# Supplementary material
Source: publisher figshare collection journal article supplement (https://acs.figshare.com/ndownloader/files/4057159)
Supplement: Supplementary file 1 [file 4057159]

data_1c
_audit_creation_date        09-06-19
_audit_creation_method CRYSTALS_ver_12.86

_oxford_structure_analysis_title  '101abdv09'
_chemical_name_systematic         .
_chemical_melting_point           .

 
_cell_length_a                    9.72840(10)
_cell_length_b                    30.8098(4)
_cell_length_c                    11.1839(2)
_cell_angle_alpha                 90
_cell_angle_beta                  96.5977(6)
_cell_angle_gamma                 90
_cell_volume                      3329.95(8)
 
_symmetry_cell_setting            'Monoclinic' 
_symmetry_space_group_name_H-M    'P 1 21/c 1 ' 
_symmetry_space_group_name_Hall   '-P 2ybc' 
loop_
 _symmetry_equiv_pos_as_xyz
 'x,y,z'
 '-x,-y,-z'
 '-x,y+1/2,-z+1/2'
 'x,-y+1/2,z+1/2'

loop_
_atom_type_symbol
_atom_type_scat_dispersion_real
_atom_type_scat_dispersion_imag
_atom_type_scat_Cromer_Mann_a1
_atom_type_scat_Cromer_Mann_b1
_atom_type_scat_Cromer_Mann_a2
_atom_type_scat_Cromer_Mann_b2
_atom_type_scat_Cromer_Mann_a3
_atom_type_scat_Cromer_Mann_b3
_atom_type_scat_Cromer_Mann_a4
_atom_type_scat_Cromer_Mann_b4
_atom_type_scat_Cromer_Mann_c
_atom_type_scat_source  
 C       0.0033   0.0016   2.3100  20.8439   1.0200  10.2075   1.5886   0.5687
   0.8650  51.6512   0.2156 'International Tables Vol C 4.2.6.8 and 6.1.1.4'
 H       0.0000   0.0000   0.4930  10.5109   0.3229  26.1257   0.1402   3.1424
   0.0408  57.7998   0.0030 'International Tables Vol C 4.2.6.8 and 6.1.1.4'
 B       0.0013   0.0007   2.0545  23.2185   1.3326   1.0210   1.0979  60.3498
   0.7068   0.1403  -0.1932 'International Tables Vol C 4.2.6.8 and 6.1.1.4'
 Fe      0.3463   0.8444  11.7695   4.7611   7.3573   0.3072   3.5222  15.3535
   2.3045  76.8805   1.0369 'International Tables Vol C 4.2.6.8 and 6.1.1.4'
 
 
_cell_formula_units_Z                    4

# Given Formula = C42 H50 B2 Fe1 
# Dc =      1.26 Fooo =   1328.00 Mu =      4.83 M =    632.33
# Found Formula = C42 H44 B2 Fe1 
# Dc =      1.25 FOOO =   1328.00 Mu =      4.82 M =    626.28

_chemical_formula_sum             'C42 H44 B2 Fe1'
_chemical_formula_moiety          'C42 H44 B2 Fe1'
_chemical_compound_source                ?
_chemical_formula_weight            626.28
 
 
_cell_measurement_reflns_used         7006
_cell_measurement_theta_min              5
_cell_measurement_theta_max             27
_cell_measurement_temperature          150
 
_exptl_crystal_description        'block' 
_exptl_crystal_colour             'red' 
_exptl_crystal_size_min           0.10 
_exptl_crystal_size_mid           0.31 
_exptl_crystal_size_max           0.42 
 
_exptl_crystal_density_diffrn     1.249 
_exptl_crystal_density_meas       ? 
_exptl_crystal_density_method     'not measured' 
# Non-dispersive F(000): 
_exptl_crystal_F_000              1328 
_exptl_absorpt_coefficient_mu     0.482 
 
# Sheldrick geometric approximatio 0.86 0.82 
_exptl_absorpt_correction_type    multi-scan 
_exptl_absorpt_process_details    'DENZO/SCALEPACK (Otwinowski & Minor, 1997)' 
_exptl_absorpt_correction_T_min   0.70 
_exptl_absorpt_correction_T_max   0.82 
# For a Kappa CCD, set Tmin to 1.0 and 
# Tmax to the ratio of max:min frame scales in scale_all.log 
_diffrn_measurement_device        'Nonius KappaCCD' 
_diffrn_measurement_device_type   'Area' 
_diffrn_radiation_monochromator   'graphite' 
_diffrn_radiation_type            'Mo K\a'
_diffrn_radiation_wavelength           0.71073
_diffrn_measurement_method        \w 
 
# If a reference occurs more than once, delete the author 
# and date from subsequent references. 
_computing_data_collection        'COLLECT (Nonius, 1997-2001).' 
_computing_cell_refinement        'DENZO/SCALEPACK (Otwinowski & Minor, 1997)' 
_computing_data_reduction         'DENZO/SCALEPACK (Otwinowski & Minor, 1997)' 
_computing_structure_solution     'SIR92 (Altomare et al., 1994)' 
_computing_structure_refinement   'CRYSTALS (Betteridge et al., 2003)' 
_computing_publication_material   'CRYSTALS (Betteridge et al., 2003)' 
_computing_molecular_graphics     'CAMERON (Watkin et al., 1996)' 
 
_diffrn_standards_interval_time   . 
_diffrn_standards_interval_count  . 
_diffrn_standards_number          0 
_diffrn_standards_decay_%         ? 
 
_diffrn_ambient_temperature        150
_diffrn_reflns_number             27276 
_reflns_number_total              7541 
_diffrn_reflns_av_R_equivalents   0.048 
# Number of reflections with Friedels Law is 7541 
# Number of reflections without Friedels Law is 13496 
# Theoretical number of reflections is about 7639 
 
 
_diffrn_reflns_theta_min          5.138 
_diffrn_reflns_theta_max          27.486 
_diffrn_measured_fraction_theta_max 0.986 
 
_diffrn_reflns_theta_full         25.287 
_diffrn_measured_fraction_theta_full 0.988 
 
 
_diffrn_reflns_limit_h_min        -12 
_diffrn_reflns_limit_h_max        12 
_diffrn_reflns_limit_k_min        -39 
_diffrn_reflns_limit_k_max        40 
_diffrn_reflns_limit_l_min        -14 
_diffrn_reflns_limit_l_max        14 
_reflns_limit_h_min               -12 
_reflns_limit_h_max               12 
_reflns_limit_k_min               0 
_reflns_limit_k_max               40 
_reflns_limit_l_min               0 
_reflns_limit_l_max               14 
 
_oxford_diffrn_Wilson_B_factor    1.94 
_oxford_diffrn_Wilson_scale       11.13 
 
_atom_sites_solution_primary      direct #heavy,direct,difmap,geom
# _atom_sites_solution_secondary  difmap
_atom_sites_solution_hydrogens    geom
 
_refine_diff_density_min          -0.48 
_refine_diff_density_max          0.68 
 
 
# The current dictionary definitions do not cover the 
# situation where the reflections used for refinement were 
# selected by a user-defined sigma threshold 
 
 
# The values actually used during refinement 
_oxford_reflns_threshold_expression_ref     I>-3.0\s(I)
_refine_ls_number_reflns          7540 
_refine_ls_number_restraints      0 
_refine_ls_number_parameters      406 
_oxford_refine_ls_R_factor_ref    0.0662 
_refine_ls_wR_factor_ref          0.1024 
_refine_ls_goodness_of_fit_ref    0.9647 
_refine_ls_shift/su_max           0.001747 
 
 
# The values computed from all data 
_oxford_reflns_number_all         7540 
_refine_ls_R_factor_all           0.0662 
_refine_ls_wR_factor_all          0.1024 
 
# The values computed with a 2 sigma cutoff - a la SHELX 
_reflns_threshold_expression      I>2.0\s(I)
_reflns_number_gt                 5636 
_refine_ls_R_factor_gt            0.0428 
_refine_ls_wR_factor_gt           0.0927 
 
# choose from: rm (reference molecule of known chirality), 
# ad (anomolous dispersion - Flack), rmad (rm and ad), 
# syn (from synthesis), unk (unknown) or . (not applicable). 
_chemical_absolute_configuration  '.' 
 
 
_refine_ls_structure_factor_coef  Fsqd 
_refine_ls_matrix_type            full
_refine_ls_hydrogen_treatment     noref          # none, undef, noref, refall,
                                                 # refxyz, refU, constr or mixed
_refine_ls_weighting_scheme       calc 
_refine_ls_weighting_details 
;
 Method= Modified Sheldrick 
 w=1/[\s^2^(F^2^) + ( 0.04P)^2^ + 2.45P] 
 ,where P=(max(Fo^2^,0) + 2Fc^2^)/3 
;
# Insert your own references if required - in alphabetical order 
_publ_section_references 
; 
Altomare, A., Cascarano, G., Giacovazzo, C., Guagliardi, A., Burla, M.C., 
Polidori, G. & Camalli, M. (1994). J. Appl. Cryst. 27, 435. 
 
Betteridge, P.W., Carruthers, J.R., Cooper, R.I., 
Prout, K. & Watkin, D.J. (2003). J. Appl. Cryst. 36, 1487. 
 
Nonius (1997-2001). COLLECT. Nonius BV, Delft, The Netherlands. 
 
Otwinowski, Z. & Minor, W. (1997). Methods in Enzymology, Vol. 276, 
edited by C. W. Carter Jr & R. M. Sweet, pp. 307--326. 
New York: Academic Press. 
 
Watkin, D.J., Prout, C.K. & Pearce, L.J. (1996). CAMERON, Chemical 
Crystallography Laboratory, Oxford, UK. 
; 

# Uequiv = arithmetic mean of Ui i.e. Ueqiv = (U1+U2+U3)/3

# Replace last . with number of unfound hydrogen atomsattached to an atom.

# ..._refinement_flags_... 
# . no refinement constraints           S special position constraint on site
# G rigid group refinement of site      R riding atom
# D distance or angle restraint on site T thermal displacement constraints
# U Uiso or Uij restraint (rigid bond)  P partial occupancy constraint


loop_
_atom_site_label
_atom_site_type_symbol
_atom_site_fract_x
_atom_site_fract_y
_atom_site_fract_z
_atom_site_U_iso_or_equiv
_atom_site_occupancy
_atom_site_adp_type
_atom_site_refinement_flags_posn
_atom_site_refinement_flags_adp
_atom_site_refinement_flags_occupancy
_atom_site_disorder_assembly
_atom_site_disorder_group
_oxford_atom_site_special_shape
_atom_site_attached_hydrogens
Fe1 Fe 0.34676(3) 0.666443(9) 0.06429(2) 0.0225 1.0000 Uani . . . . . . . 
C2 C 0.52936(19) 0.65317(6) 0.16968(17) 0.0265 1.0000 Uani . . . . . . . 
C3 C 0.5246(2) 0.69715(7) 0.13394(18) 0.0320 1.0000 Uani . . . . . . . 
C4 C 0.4077(2) 0.71675(6) 0.17828(18) 0.0307 1.0000 Uani . . . . . . . 
C5 C 0.3402(2) 0.68449(6) 0.24053(16) 0.0252 1.0000 Uani . . . . . . . 
C6 C 0.41705(19) 0.64430(6) 0.23988(16) 0.0237 1.0000 Uani . . . . . . . 
B7 B 0.3937(2) 0.60385(7) 0.31689(18) 0.0229 1.0000 Uani . . . . . . . 
C8 C 0.49872(19) 0.56364(6) 0.32905(17) 0.0237 1.0000 Uani . . . . . . . 
C9 C 0.5055(2) 0.53318(6) 0.23606(18) 0.0264 1.0000 Uani . . . . . . . 
C10 C 0.4351(2) 0.54057(7) 0.11088(18) 0.0322 1.0000 Uani . . . . . . . 
C11 C 0.5817(2) 0.49491(7) 0.2572(2) 0.0326 1.0000 Uani . . . . . . . 
C12 C 0.6616(2) 0.48796(7) 0.3653(2) 0.0376 1.0000 Uani . . . . . . . 
C13 C 0.6647(2) 0.51885(8) 0.45377(19) 0.0365 1.0000 Uani . . . . . . . 
C14 C 0.5831(2) 0.55622(7) 0.43906(18) 0.0293 1.0000 Uani . . . . . . . 
C15 C 0.5906(2) 0.58809(8) 0.54089(19) 0.0399 1.0000 Uani . . . . . . . 
C16 C 0.2674(2) 0.60363(6) 0.39595(16) 0.0245 1.0000 Uani . . . . . . . 
C17 C 0.1620(2) 0.57178(6) 0.37389(16) 0.0254 1.0000 Uani . . . . . . . 
C18 C 0.1620(2) 0.53979(7) 0.27242(18) 0.0305 1.0000 Uani . . . . . . . 
C19 C 0.0520(2) 0.57058(7) 0.44284(18) 0.0330 1.0000 Uani . . . . . . . 
C20 C 0.0428(2) 0.60002(8) 0.53419(19) 0.0406 1.0000 Uani . . . . . . . 
C21 C 0.1434(3) 0.63087(8) 0.55743(19) 0.0395 1.0000 Uani . . . . . . . 
C22 C 0.2554(2) 0.63375(6) 0.48975(17) 0.0300 1.0000 Uani . . . . . . . 
C23 C 0.3589(3) 0.66946(7) 0.52303(19) 0.0393 1.0000 Uani . . . . . . . 
C24 C 0.2319(2) 0.69502(7) -0.08078(17) 0.0290 1.0000 Uani . . . . . . . 
C25 C 0.15192(19) 0.65988(6) -0.03874(16) 0.0245 1.0000 Uani . . . . . . . 
C26 C 0.2381(2) 0.62188(6) -0.04476(17) 0.0268 1.0000 Uani . . . . . . . 
C27 C 0.3617(2) 0.63313(7) -0.09270(18) 0.0322 1.0000 Uani . . . . . . . 
C28 C 0.3578(2) 0.67867(8) -0.11433(17) 0.0340 1.0000 Uani . . . . . . . 
B29 B 0.0000(2) 0.65978(7) -0.00896(19) 0.0244 1.0000 Uani . . . . . . . 
C30 C -0.06332(18) 0.61500(6) 0.02797(16) 0.0236 1.0000 Uani . . . . . . . 
C31 C -0.07117(19) 0.57820(6) -0.04813(17) 0.0260 1.0000 Uani . . . . . . . 
C32 C -0.1290(2) 0.53976(6) -0.01149(19) 0.0309 1.0000 Uani . . . . . . . 
C33 C -0.1800(2) 0.53669(7) 0.09755(19) 0.0315 1.0000 Uani . . . . . . . 
C34 C -0.1728(2) 0.57216(7) 0.17380(17) 0.0284 1.0000 Uani . . . . . . . 
C35 C -0.11504(18) 0.61114(6) 0.14091(17) 0.0251 1.0000 Uani . . . . . . . 
C36 C -0.1038(2) 0.64795(7) 0.22978(18) 0.0315 1.0000 Uani . . . . . . . 
C37 C -0.0257(2) 0.57784(7) -0.17312(18) 0.0341 1.0000 Uani . . . . . . . 
C38 C -0.0948(2) 0.70190(6) -0.02965(18) 0.0286 1.0000 Uani . . . . . . . 
C39 C -0.0707(2) 0.74084(7) 0.0364(2) 0.0344 1.0000 Uani . . . . . . . 
C40 C 0.0422(2) 0.74467(7) 0.1398(2) 0.0451 1.0000 Uani . . . . . . . 
C41 C -0.1559(2) 0.77678(7) 0.0102(2) 0.0437 1.0000 Uani . . . . . . . 
C42 C -0.2634(2) 0.77557(8) -0.0809(2) 0.0452 1.0000 Uani . . . . . . . 
C43 C -0.2890(2) 0.73800(8) -0.1461(2) 0.0415 1.0000 Uani . . . . . . . 
C44 C -0.2088(2) 0.70116(7) -0.12145(19) 0.0338 1.0000 Uani . . . . . . . 
C45 C -0.2456(3) 0.66161(8) -0.1971(2) 0.0473 1.0000 Uani . . . . . . . 
H21 H 0.5989 0.6315 0.1497 0.0308 1.0000 Uiso . . . . . . . 
H31 H 0.5897 0.7114 0.0857 0.0369 1.0000 Uiso . . . . . . . 
H41 H 0.3745 0.7471 0.1654 0.0356 1.0000 Uiso . . . . . . . 
H51 H 0.2522 0.6883 0.2780 0.0297 1.0000 Uiso . . . . . . . 
H101 H 0.3872 0.5149 0.0784 0.0483 1.0000 Uiso . . . . . . . 
H103 H 0.5011 0.5489 0.0582 0.0478 1.0000 Uiso . . . . . . . 
H102 H 0.3697 0.5634 0.1094 0.0474 1.0000 Uiso . . . . . . . 
H111 H 0.5776 0.4739 0.1959 0.0383 1.0000 Uiso . . . . . . . 
H121 H 0.7134 0.4627 0.3785 0.0436 1.0000 Uiso . . . . . . . 
H131 H 0.7207 0.5152 0.5269 0.0417 1.0000 Uiso . . . . . . . 
H151 H 0.6554 0.5780 0.6056 0.0570 1.0000 Uiso . . . . . . . 
H153 H 0.6213 0.6156 0.5175 0.0580 1.0000 Uiso . . . . . . . 
H152 H 0.5001 0.5921 0.5694 0.0573 1.0000 Uiso . . . . . . . 
H181 H 0.0864 0.5194 0.2738 0.0441 1.0000 Uiso . . . . . . . 
H183 H 0.1479 0.5542 0.1957 0.0454 1.0000 Uiso . . . . . . . 
H182 H 0.2486 0.5237 0.2767 0.0440 1.0000 Uiso . . . . . . . 
H191 H -0.0173 0.5494 0.4261 0.0388 1.0000 Uiso . . . . . . . 
H201 H -0.0323 0.5990 0.5790 0.0492 1.0000 Uiso . . . . . . . 
H211 H 0.1387 0.6504 0.6198 0.0468 1.0000 Uiso . . . . . . . 
H231 H 0.3931 0.6680 0.6077 0.0570 1.0000 Uiso . . . . . . . 
H233 H 0.3151 0.6981 0.5074 0.0574 1.0000 Uiso . . . . . . . 
H232 H 0.4386 0.6686 0.4777 0.0573 1.0000 Uiso . . . . . . . 
H241 H 0.2031 0.7251 -0.0860 0.0328 1.0000 Uiso . . . . . . . 
H261 H 0.2125 0.5926 -0.0196 0.0315 1.0000 Uiso . . . . . . . 
H271 H 0.4400 0.6137 -0.1048 0.0394 1.0000 Uiso . . . . . . . 
H281 H 0.4305 0.6953 -0.1424 0.0399 1.0000 Uiso . . . . . . . 
H321 H -0.1319 0.5154 -0.0628 0.0349 1.0000 Uiso . . . . . . . 
H331 H -0.2192 0.5105 0.1202 0.0374 1.0000 Uiso . . . . . . . 
H341 H -0.2068 0.5695 0.2495 0.0326 1.0000 Uiso . . . . . . . 
H363 H -0.1496 0.6413 0.2981 0.0458 1.0000 Uiso . . . . . . . 
H362 H -0.1446 0.6739 0.1958 0.0451 1.0000 Uiso . . . . . . . 
H361 H -0.0098 0.6544 0.2575 0.0458 1.0000 Uiso . . . . . . . 
H373 H 0.0431 0.5549 -0.1810 0.0497 1.0000 Uiso . . . . . . . 
H372 H -0.1045 0.5721 -0.2325 0.0488 1.0000 Uiso . . . . . . . 
H371 H 0.0119 0.6054 -0.1949 0.0485 1.0000 Uiso . . . . . . . 
H403 H 0.0938 0.7712 0.1336 0.0658 1.0000 Uiso . . . . . . . 
H402 H 0.1046 0.7211 0.1422 0.0652 1.0000 Uiso . . . . . . . 
H401 H 0.0032 0.7449 0.2158 0.0654 1.0000 Uiso . . . . . . . 
H411 H -0.1365 0.8019 0.0569 0.0515 1.0000 Uiso . . . . . . . 
H421 H -0.3185 0.8001 -0.0988 0.0543 1.0000 Uiso . . . . . . . 
H431 H -0.3618 0.7370 -0.2095 0.0487 1.0000 Uiso . . . . . . . 
H453 H -0.3260 0.6677 -0.2529 0.0671 1.0000 Uiso . . . . . . . 
H452 H -0.1671 0.6537 -0.2409 0.0665 1.0000 Uiso . . . . . . . 
H451 H -0.2663 0.6378 -0.1478 0.0668 1.0000 Uiso . . . . . . . 
loop_
_atom_site_aniso_label
_atom_site_aniso_U_11
_atom_site_aniso_U_22
_atom_site_aniso_U_33
_atom_site_aniso_U_23
_atom_site_aniso_U_13
_atom_site_aniso_U_12
Fe1 0.02019(14) 0.02404(14) 0.02226(14) 0.00247(11) -0.00160(10) -0.00320(11) 
C2 0.0190(9) 0.0331(10) 0.0256(10) 0.0031(8) -0.0047(8) -0.0034(8) 
C3 0.0272(10) 0.0345(11) 0.0316(11) 0.0039(9) -0.0078(8) -0.0119(9) 
C4 0.0356(11) 0.0228(10) 0.0303(10) 0.0013(8) -0.0105(9) -0.0035(8) 
C5 0.0298(10) 0.0231(9) 0.0210(9) -0.0005(8) -0.0049(8) 0.0012(8) 
C6 0.0245(10) 0.0239(10) 0.0213(9) -0.0012(7) -0.0035(7) -0.0005(8) 
B7 0.0237(11) 0.0237(10) 0.0196(10) -0.0027(8) -0.0045(8) -0.0028(8) 
C8 0.0199(9) 0.0240(9) 0.0276(10) 0.0057(8) 0.0041(8) -0.0017(7) 
C9 0.0232(9) 0.0256(10) 0.0313(10) 0.0034(8) 0.0069(8) 0.0000(8) 
C10 0.0335(11) 0.0317(11) 0.0313(11) -0.0052(9) 0.0033(9) 0.0048(9) 
C11 0.0305(11) 0.0263(10) 0.0425(12) 0.0040(9) 0.0105(9) 0.0024(8) 
C12 0.0322(12) 0.0306(11) 0.0514(14) 0.0169(10) 0.0102(10) 0.0097(9) 
C13 0.0267(11) 0.0450(13) 0.0369(12) 0.0202(10) 0.0003(9) 0.0054(9) 
C14 0.0234(10) 0.0335(11) 0.0308(11) 0.0071(9) 0.0022(8) -0.0020(8) 
C15 0.0401(13) 0.0481(14) 0.0291(11) 0.0026(10) -0.0070(9) 0.0000(10) 
C16 0.0280(10) 0.0243(9) 0.0207(9) 0.0022(7) 0.0004(8) 0.0041(8) 
C17 0.0264(10) 0.0269(10) 0.0224(9) 0.0052(8) 0.0001(8) 0.0034(8) 
C18 0.0261(10) 0.0308(11) 0.0338(11) -0.0030(9) 0.0001(8) -0.0023(8) 
C19 0.0273(11) 0.0428(12) 0.0288(11) 0.0065(9) 0.0024(8) 0.0003(9) 
C20 0.0357(12) 0.0590(15) 0.0289(11) 0.0051(11) 0.0118(9) 0.0074(11) 
C21 0.0514(14) 0.0431(13) 0.0251(11) -0.0040(9) 0.0090(10) 0.0107(11) 
C22 0.0402(12) 0.0277(10) 0.0214(9) -0.0005(8) 0.0002(9) 0.0041(9) 
C23 0.0580(15) 0.0320(11) 0.0265(10) -0.0071(9) -0.0011(10) -0.0005(10) 
C24 0.0298(11) 0.0320(11) 0.0232(10) 0.0080(8) -0.0048(8) -0.0060(8) 
C25 0.0226(9) 0.0265(10) 0.0225(9) 0.0001(7) -0.0056(8) -0.0022(8) 
C26 0.0251(10) 0.0288(10) 0.0254(10) -0.0018(8) -0.0023(8) -0.0013(8) 
C27 0.0261(10) 0.0440(12) 0.0257(10) -0.0053(9) -0.0003(8) 0.0009(9) 
C28 0.0288(11) 0.0512(13) 0.0217(10) 0.0059(9) 0.0013(8) -0.0093(10) 
B29 0.0256(11) 0.0275(11) 0.0183(10) 0.0005(8) -0.0053(8) -0.0007(9) 
C30 0.0179(9) 0.0274(10) 0.0244(9) -0.0002(8) -0.0017(7) 0.0009(7) 
C31 0.0227(10) 0.0291(10) 0.0258(10) -0.0005(8) 0.0016(8) -0.0027(8) 
C32 0.0289(11) 0.0274(10) 0.0360(11) -0.0065(9) 0.0017(9) -0.0066(8) 
C33 0.0268(10) 0.0299(11) 0.0377(11) 0.0027(9) 0.0038(9) -0.0055(8) 
C34 0.0225(10) 0.0360(11) 0.0270(10) 0.0037(9) 0.0038(8) 0.0003(8) 
C35 0.0173(9) 0.0306(10) 0.0262(10) 0.0008(8) -0.0020(7) 0.0053(8) 
C36 0.0312(11) 0.0332(11) 0.0296(11) -0.0046(9) 0.0007(9) 0.0031(9) 
C37 0.0360(12) 0.0391(12) 0.0266(10) -0.0070(9) 0.0013(9) -0.0080(9) 
C38 0.0222(10) 0.0296(10) 0.0339(11) 0.0095(9) 0.0025(8) -0.0001(8) 
C39 0.0276(11) 0.0275(11) 0.0474(13) 0.0049(10) 0.0009(9) 0.0032(9) 
C40 0.0429(13) 0.0292(12) 0.0602(16) -0.0100(11) -0.0076(12) 0.0056(10) 
C41 0.0391(13) 0.0279(11) 0.0640(16) 0.0050(11) 0.0058(11) 0.0064(10) 
C42 0.0316(12) 0.0418(14) 0.0632(16) 0.0256(12) 0.0092(11) 0.0131(10) 
C43 0.0264(11) 0.0480(14) 0.0491(14) 0.0235(12) 0.0002(10) 0.0041(10) 
C44 0.0239(10) 0.0406(12) 0.0361(11) 0.0153(10) -0.0001(9) -0.0007(9) 
C45 0.0400(13) 0.0548(15) 0.0419(13) 0.0048(11) -0.0180(11) 0.0007(11) 

_refine_ls_extinction_method 
    'None'
_oxford_refine_ls_scale 0.3011(2) 
loop_
 _geom_bond_atom_site_label_1
 _geom_bond_site_symmetry_1
 _geom_bond_atom_site_label_2
 _geom_bond_site_symmetry_2
 _geom_bond_distance
 _geom_bond_publ_flag
Fe1 . C2 . 2.0570(18)    yes
Fe1 . C3 . 2.0459(19)    yes
Fe1 . C4 . 2.051(2)    yes
Fe1 . C5 . 2.0561(18)    yes
Fe1 . C6 . 2.1168(18)    yes
Fe1 . C24 . 2.0588(19)    yes
Fe1 . C25 . 2.1117(18)    yes
Fe1 . C26 . 2.0479(19)    yes
Fe1 . C27 . 2.053(2)    yes
Fe1 . C28 . 2.0478(19)    yes
C2 . C3 . 1.412(3)    yes
C2 . C6 . 1.443(3)    yes
C2 . H21 . 0.995    no
C3 . C4 . 1.426(3)    yes
C3 . H31 . 0.981    no
C4 . C5 . 1.417(3)    yes
C4 . H41 . 0.994    no
C5 . C6 . 1.447(3)    yes
C5 . H51 . 1.002    no
C6 . B7 . 1.546(3)    yes
B7 . C8 . 1.602(3)    yes
B7 . C16 . 1.594(3)    yes
C8 . C9 . 1.408(3)    yes
C8 . C14 . 1.417(3)    yes
C9 . C10 . 1.503(3)    yes
C9 . C11 . 1.399(3)    yes
C10 . H101 . 0.968    no
C10 . H103 . 0.955    no
C10 . H102 . 0.947    no
C11 . C12 . 1.376(3)    yes
C11 . H111 . 0.942    no
C12 . C13 . 1.371(3)    yes
C12 . H121 . 0.930    no
C13 . C14 . 1.397(3)    yes
C13 . H131 . 0.936    no
C14 . C15 . 1.499(3)    yes
C15 . H151 . 0.956    no
C15 . H153 . 0.947    no
C15 . H152 . 0.978    no
C16 . C17 . 1.420(3)    yes
C16 . C22 . 1.415(3)    yes
C17 . C18 . 1.503(3)    yes
C17 . C19 . 1.390(3)    yes
C18 . H181 . 0.969    no
C18 . H183 . 0.961    no
C18 . H182 . 0.974    no
C19 . C20 . 1.377(3)    yes
C19 . H191 . 0.941    no
C20 . C21 . 1.367(3)    yes
C20 . H201 . 0.933    no
C21 . C22 . 1.399(3)    yes
C21 . H211 . 0.926    no
C22 . C23 . 1.509(3)    yes
C23 . H231 . 0.969    no
C23 . H233 . 0.987    no
C23 . H232 . 0.975    no
C24 . C25 . 1.443(3)    yes
C24 . C28 . 1.414(3)    yes
C24 . H241 . 0.969    no
C25 . C26 . 1.446(3)    yes
C25 . B29 . 1.552(3)    yes
C26 . C27 . 1.415(3)    yes
C26 . H261 . 0.986    no
C27 . C28 . 1.424(3)    yes
C27 . H271 . 0.990    no
C28 . H281 . 0.956    no
B29 . C30 . 1.585(3)    yes
B29 . C38 . 1.593(3)    yes
C30 . C31 . 1.414(3)    yes
C30 . C35 . 1.417(3)    yes
C31 . C32 . 1.393(3)    yes
C31 . C37 . 1.514(3)    yes
C32 . C33 . 1.372(3)    yes
C32 . H321 . 0.943    no
C33 . C34 . 1.383(3)    yes
C33 . H331 . 0.941    no
C34 . C35 . 1.393(3)    yes
C34 . H341 . 0.947    no
C35 . C36 . 1.504(3)    yes
C36 . H363 . 0.950    no
C36 . H362 . 0.952    no
C36 . H361 . 0.952    no
C37 . H373 . 0.983    no
C37 . H372 . 0.971    no
C37 . H371 . 0.968    no
C38 . C39 . 1.414(3)    yes
C38 . C44 . 1.423(3)    yes
C39 . C40 . 1.506(3)    yes
C39 . C41 . 1.394(3)    yes
C40 . H403 . 0.966    no
C40 . H402 . 0.944    no
C40 . H401 . 0.970    no
C41 . C42 . 1.374(3)    yes
C41 . H411 . 0.941    no
C42 . C43 . 1.376(4)    yes
C42 . H421 . 0.933    no
C43 . C44 . 1.387(3)    yes
C43 . H431 . 0.944    no
C44 . C45 . 1.503(3)    yes
C45 . H453 . 0.961    no
C45 . H452 . 0.984    no
C45 . H451 . 0.954    no
loop_
 _geom_angle_atom_site_label_1
 _geom_angle_site_symmetry_1
 _geom_angle_atom_site_label_2
 _geom_angle_site_symmetry_2
 _geom_angle_atom_site_label_3
 _geom_angle_site_symmetry_3
 _geom_angle
 _geom_angle_publ_flag
C2 . Fe1 . C3 . 40.26(8)    yes
C2 . Fe1 . C4 . 67.98(8)    yes
C3 . Fe1 . C4 . 40.74(8)    yes
C2 . Fe1 . C5 . 67.93(8)    yes
C3 . Fe1 . C5 . 68.16(8)    yes
C4 . Fe1 . C5 . 40.38(8)    yes
C2 . Fe1 . C6 . 40.42(7)    yes
C3 . Fe1 . C6 . 68.09(8)    yes
C4 . Fe1 . C6 . 68.12(7)    yes
C5 . Fe1 . C6 . 40.54(7)    yes
C2 . Fe1 . C24 . 153.03(8)    yes
C3 . Fe1 . C24 . 117.44(8)    yes
C4 . Fe1 . C24 . 104.99(8)    yes
C5 . Fe1 . C24 . 124.48(8)    yes
C6 . Fe1 . C24 . 163.15(8)    yes
C2 . Fe1 . C25 . 162.86(8)    yes
C3 . Fe1 . C25 . 156.75(8)    yes
C4 . Fe1 . C25 . 126.08(8)    yes
C5 . Fe1 . C25 . 115.10(8)    yes
C6 . Fe1 . C25 . 130.49(7)    yes
C2 . Fe1 . C26 . 124.11(8)    yes
C3 . Fe1 . C26 . 153.25(8)    yes
C4 . Fe1 . C26 . 165.82(8)    yes
C5 . Fe1 . C26 . 132.95(8)    yes
C6 . Fe1 . C26 . 115.22(7)    yes
C2 . Fe1 . C27 . 104.43(8)    yes
C3 . Fe1 . C27 . 114.63(8)    yes
C4 . Fe1 . C27 . 149.95(9)    yes
C5 . Fe1 . C27 . 165.46(8)    yes
C6 . Fe1 . C27 . 125.81(8)    yes
C2 . Fe1 . C28 . 117.19(8)    yes
C3 . Fe1 . C28 . 98.60(8)    yes
C4 . Fe1 . C28 . 115.07(9)    yes
C5 . Fe1 . C28 . 153.69(9)    yes
C6 . Fe1 . C28 . 156.46(8)    yes
C24 . Fe1 . C25 . 40.47(7)    yes
C24 . Fe1 . C26 . 67.73(8)    yes
C25 . Fe1 . C26 . 40.64(7)    yes
C24 . Fe1 . C27 . 67.99(8)    yes
C25 . Fe1 . C27 . 68.47(8)    yes
C26 . Fe1 . C27 . 40.37(8)    yes
C24 . Fe1 . C28 . 40.27(8)    yes
C25 . Fe1 . C28 . 68.26(8)    yes
C26 . Fe1 . C28 . 67.89(8)    yes
C27 . Fe1 . C28 . 40.62(9)    yes
Fe1 . C2 . C3 . 69.45(11)    yes
Fe1 . C2 . C6 . 72.02(10)    yes
C3 . C2 . C6 . 109.49(17)    yes
Fe1 . C2 . H21 . 124.7    no
C3 . C2 . H21 . 125.6    no
C6 . C2 . H21 . 124.9    no
C2 . C3 . Fe1 . 70.29(11)    yes
C2 . C3 . C4 . 108.02(17)    yes
Fe1 . C3 . C4 . 69.81(11)    yes
C2 . C3 . H31 . 125.6    no
Fe1 . C3 . H31 . 124.6    no
C4 . C3 . H31 . 126.4    no
C3 . C4 . Fe1 . 69.45(11)    yes
C3 . C4 . C5 . 107.88(17)    yes
Fe1 . C4 . C5 . 70.01(11)    yes
C3 . C4 . H41 . 127.4    no
Fe1 . C4 . H41 . 123.7    no
C5 . C4 . H41 . 124.7    no
C4 . C5 . Fe1 . 69.60(11)    yes
C4 . C5 . C6 . 109.19(17)    yes
Fe1 . C5 . C6 . 71.99(10)    yes
C4 . C5 . H51 . 126.1    no
Fe1 . C5 . H51 . 123.7    no
C6 . C5 . H51 . 124.7    no
Fe1 . C6 . C5 . 67.47(10)    yes
Fe1 . C6 . C2 . 67.56(10)    yes
C5 . C6 . C2 . 105.35(16)    yes
Fe1 . C6 . B7 . 136.38(13)    yes
C5 . C6 . B7 . 125.29(17)    yes
C2 . C6 . B7 . 128.65(17)    yes
C6 . B7 . C8 . 122.52(17)    yes
C6 . B7 . C16 . 118.97(17)    yes
C8 . B7 . C16 . 118.32(16)    yes
B7 . C8 . C9 . 122.44(17)    yes
B7 . C8 . C14 . 119.91(17)    yes
C9 . C8 . C14 . 117.53(17)    yes
C8 . C9 . C10 . 122.13(17)    yes
C8 . C9 . C11 . 120.38(18)    yes
C10 . C9 . C11 . 117.47(18)    yes
C9 . C10 . H101 . 111.9    no
C9 . C10 . H103 . 110.4    no
H101 . C10 . H103 . 108.5    no
C9 . C10 . H102 . 111.2    no
H101 . C10 . H102 . 107.9    no
H103 . C10 . H102 . 106.8    no
C9 . C11 . C12 . 121.0(2)    yes
C9 . C11 . H111 . 118.7    no
C12 . C11 . H111 . 120.3    no
C11 . C12 . C13 . 119.29(19)    yes
C11 . C12 . H121 . 120.7    no
C13 . C12 . H121 . 120.0    no
C12 . C13 . C14 . 121.47(19)    yes
C12 . C13 . H131 . 120.7    no
C14 . C13 . H131 . 117.8    no
C8 . C14 . C13 . 119.97(19)    yes
C8 . C14 . C15 . 121.79(18)    yes
C13 . C14 . C15 . 118.22(19)    yes
C14 . C15 . H151 . 109.4    no
C14 . C15 . H153 . 111.5    no
H151 . C15 . H153 . 107.4    no
C14 . C15 . H152 . 111.3    no
H151 . C15 . H152 . 109.6    no
H153 . C15 . H152 . 107.5    no
B7 . C16 . C17 . 119.59(16)    yes
B7 . C16 . C22 . 122.86(17)    yes
C17 . C16 . C22 . 117.55(17)    yes
C16 . C17 . C18 . 121.45(17)    yes
C16 . C17 . C19 . 120.58(18)    yes
C18 . C17 . C19 . 117.91(18)    yes
C17 . C18 . H181 . 110.4    no
C17 . C18 . H183 . 111.1    no
H181 . C18 . H183 . 106.4    no
C17 . C18 . H182 . 111.8    no
H181 . C18 . H182 . 108.8    no
H183 . C18 . H182 . 108.2    no
C17 . C19 . C20 . 120.9(2)    yes
C17 . C19 . H191 . 119.2    no
C20 . C19 . H191 . 119.9    no
C19 . C20 . C21 . 119.57(19)    yes
C19 . C20 . H201 . 119.9    no
C21 . C20 . H201 . 120.6    no
C20 . C21 . C22 . 121.7(2)    yes
C20 . C21 . H211 . 119.9    no
C22 . C21 . H211 . 118.4    no
C16 . C22 . C21 . 119.66(19)    yes
C16 . C22 . C23 . 123.47(19)    yes
C21 . C22 . C23 . 116.86(18)    yes
C22 . C23 . H231 . 110.7    no
C22 . C23 . H233 . 110.3    no
H231 . C23 . H233 . 107.9    no
C22 . C23 . H232 . 113.6    no
H231 . C23 . H232 . 107.6    no
H233 . C23 . H232 . 106.5    no
Fe1 . C24 . C25 . 71.74(10)    yes
Fe1 . C24 . C28 . 69.44(11)    yes
C25 . C24 . C28 . 109.58(18)    yes
Fe1 . C24 . H241 . 125.8    no
C25 . C24 . H241 . 125.0    no
C28 . C24 . H241 . 125.4    no
Fe1 . C25 . C24 . 67.79(10)    yes
Fe1 . C25 . C26 . 67.31(10)    yes
C24 . C25 . C26 . 104.77(16)    yes
Fe1 . C25 . B29 . 134.45(13)    yes
C24 . C25 . B29 . 129.35(17)    yes
C26 . C25 . B29 . 125.44(17)    yes
C25 . C26 . Fe1 . 72.05(10)    yes
C25 . C26 . C27 . 110.00(17)    yes
Fe1 . C26 . C27 . 70.02(11)    yes
C25 . C26 . H261 . 124.2    no
Fe1 . C26 . H261 . 125.0    no
C27 . C26 . H261 . 125.8    no
C26 . C27 . Fe1 . 69.61(11)    yes
C26 . C27 . C28 . 107.35(18)    yes
Fe1 . C27 . C28 . 69.48(12)    yes
C26 . C27 . H271 . 127.2    no
Fe1 . C27 . H271 . 123.4    no
C28 . C27 . H271 . 125.4    no
C27 . C28 . C24 . 108.26(17)    yes
C27 . C28 . Fe1 . 69.90(11)    yes
C24 . C28 . Fe1 . 70.28(11)    yes
C27 . C28 . H281 . 125.4    no
C24 . C28 . H281 . 126.3    no
Fe1 . C28 . H281 . 122.9    no
C25 . B29 . C30 . 117.78(17)    yes
C25 . B29 . C38 . 121.12(17)    yes
C30 . B29 . C38 . 120.72(17)    yes
B29 . C30 . C31 . 122.45(16)    yes
B29 . C30 . C35 . 119.58(17)    yes
C31 . C30 . C35 . 117.96(17)    yes
C30 . C31 . C32 . 120.01(17)    yes
C30 . C31 . C37 . 124.07(17)    yes
C32 . C31 . C37 . 115.86(17)    yes
C31 . C32 . C33 . 121.33(18)    yes
C31 . C32 . H321 . 118.8    no
C33 . C32 . H321 . 119.9    no
C32 . C33 . C34 . 119.71(18)    yes
C32 . C33 . H331 . 119.8    no
C34 . C33 . H331 . 120.4    no
C33 . C34 . C35 . 120.80(18)    yes
C33 . C34 . H341 . 118.9    no
C35 . C34 . H341 . 120.3    no
C30 . C35 . C34 . 120.18(18)    yes
C30 . C35 . C36 . 121.30(17)    yes
C34 . C35 . C36 . 118.46(17)    yes
C35 . C36 . H363 . 111.4    no
C35 . C36 . H362 . 112.0    no
H363 . C36 . H362 . 106.7    no
C35 . C36 . H361 . 111.5    no
H363 . C36 . H361 . 107.7    no
H362 . C36 . H361 . 107.3    no
C31 . C37 . H373 . 111.2    no
C31 . C37 . H372 . 109.9    no
H373 . C37 . H372 . 107.5    no
C31 . C37 . H371 . 112.7    no
H373 . C37 . H371 . 109.1    no
H372 . C37 . H371 . 106.2    no
B29 . C38 . C39 . 123.84(17)    yes
B29 . C38 . C44 . 118.82(18)    yes
C39 . C38 . C44 . 117.32(18)    yes
C38 . C39 . C40 . 122.01(18)    yes
C38 . C39 . C41 . 120.4(2)    yes
C40 . C39 . C41 . 117.6(2)    yes
C39 . C40 . H403 . 110.5    no
C39 . C40 . H402 . 111.8    no
H403 . C40 . H402 . 108.4    no
C39 . C40 . H401 . 110.5    no
H403 . C40 . H401 . 108.4    no
H402 . C40 . H401 . 107.2    no
C39 . C41 . C42 . 121.2(2)    yes
C39 . C41 . H411 . 117.4    no
C42 . C41 . H411 . 121.4    no
C41 . C42 . C43 . 119.5(2)    yes
C41 . C42 . H421 . 120.4    no
C43 . C42 . H421 . 120.1    no
C42 . C43 . C44 . 121.3(2)    yes
C42 . C43 . H431 . 120.0    no
C44 . C43 . H431 . 118.7    no
C38 . C44 . C43 . 120.3(2)    yes
C38 . C44 . C45 . 122.32(19)    yes
C43 . C44 . C45 . 117.4(2)    yes
C44 . C45 . H453 . 109.3    no
C44 . C45 . H452 . 109.4    no
H453 . C45 . H452 . 110.1    no
C44 . C45 . H451 . 110.6    no
H453 . C45 . H451 . 108.3    no
H452 . C45 . H451 . 109.0    no


data_2
_audit_creation_date        "10-05-19"
_audit_creation_method CRYSTALS_ver_14.03
_refine_special_details
;
The difference map indicated the presence of diffuse electron
density believed to be disordered solvent.  SQUEEZE was used
leaving a void from which the electron density was removed.
;

# SQUEEZE RESULTS (APPEND TO CIF)
# Note: Data are Listed for all Voids in the P1 Unit Cell
# i.e. Centre of Gravity, Solvent Accessible Volume,
# Recovered number of Electrons in the Void and
# Details about the Squeezed Material
loop_
  _platon_squeeze_void_nr
  _platon_squeeze_void_average_x
  _platon_squeeze_void_average_y
  _platon_squeeze_void_average_z
  _platon_squeeze_void_volume
  _platon_squeeze_void_count_electrons
  _platon_squeeze_void_content
   1  0.000  0.500  0.000       478        35 ' '
_platon_squeeze_details
;
The discrete Fourier transform of the void region were treated as
contributions to the A and B parts of the calculated structure factors.
;


_oxford_structure_analysis_title  '026pfdv10'
_chemical_name_systematic         .
_chemical_melting_point           'not measured'

 
_cell_length_a                    12.8992(2)
_cell_length_b                    13.3331(2)
_cell_length_c                    15.6365(2)
_cell_angle_alpha                 96.9261(6)
_cell_angle_beta                  112.5314(6)
_cell_angle_gamma                 90.6447(6)
_cell_volume                      2461.02(6)
 
_symmetry_cell_setting            'Triclinic' 
_symmetry_space_group_name_H-M    'P -1 ' 
_symmetry_space_group_name_Hall   '-P 1' 
loop_
 _symmetry_equiv_pos_as_xyz
 'x,y,z'
 '-x,-y,-z'

loop_
_atom_type_symbol
_atom_type_scat_dispersion_real
_atom_type_scat_dispersion_imag
_atom_type_scat_Cromer_Mann_a1
_atom_type_scat_Cromer_Mann_b1
_atom_type_scat_Cromer_Mann_a2
_atom_type_scat_Cromer_Mann_b2
_atom_type_scat_Cromer_Mann_a3
_atom_type_scat_Cromer_Mann_b3
_atom_type_scat_Cromer_Mann_a4
_atom_type_scat_Cromer_Mann_b4
_atom_type_scat_Cromer_Mann_c
_atom_type_scat_source  
 C       0.0033   0.0016   2.3100  20.8439   1.0200  10.2075   1.5886   0.5687
   0.8650  51.6512   0.2156 'International Tables Vol C 4.2.6.8 and 6.1.1.4'
 H       0.0000   0.0000   0.4930  10.5109   0.3229  26.1257   0.1402   3.1424
   0.0408  57.7998   0.0030 'International Tables Vol C 4.2.6.8 and 6.1.1.4'
 B       0.0013   0.0007   2.0545  23.2185   1.3326   1.0210   1.0979  60.3498
   0.7068   0.1403  -0.1932 'International Tables Vol C 4.2.6.8 and 6.1.1.4'
 Fe      0.3463   0.8444  11.7695   4.7611   7.3573   0.3072   3.5222  15.3535
   2.3045  76.8805   1.0369 'International Tables Vol C 4.2.6.8 and 6.1.1.4'
 O       0.0106   0.0060   3.0485  13.2771   2.2868   5.7011   1.5463   0.3239
   0.8670  32.9089   0.2508 'International Tables Vol C 4.2.6.8 and 6.1.1.4'
 
 
_cell_formula_units_Z                    2

# Given Formula = C51 H40 B2 Fe1 O2 
# Dc =      1.03 Fooo =    808.00 Mu =      3.40 M =    762.35
# Found Formula = C51 H62 B2 Fe1 
# Dc =      1.02 FOOO =    808.00 Mu =      3.36 M =    752.52

_chemical_formula_sum             'C51 H62 B2 Fe1'
_chemical_formula_moiety          'C51 H62 B2 Fe1'
_chemical_compound_source                .
_chemical_formula_weight            752.52
 
 
_cell_measurement_reflns_used        10578
_cell_measurement_theta_min              5
_cell_measurement_theta_max             27
_cell_measurement_temperature          150
 
_exptl_crystal_description        'block' 
_exptl_crystal_colour             'purple' 
_exptl_crystal_size_min           0.200 
_exptl_crystal_size_mid           0.220 
_exptl_crystal_size_max           0.310 
 
_exptl_crystal_density_diffrn     1.015 
_exptl_crystal_density_meas       .
_exptl_crystal_density_method     'not measured' 
# Non-dispersive F(000): 
_exptl_crystal_F_000              808 
_exptl_absorpt_coefficient_mu     0.336 
 
# Sheldrick geometric approximatio 0.93 0.94 
_exptl_absorpt_correction_type    multi-scan 
_exptl_absorpt_process_details    'DENZO/SCALEPACK (Otwinowski & Minor, 1997)' 
_exptl_absorpt_correction_T_min   0.84 
_exptl_absorpt_correction_T_max   0.94 
# For a Kappa CCD, set Tmin to 1.0 and 
# Tmax to the ratio of max:min frame scales in scale_all.log 
_diffrn_measurement_device_type   'Nonius KappaCCD' 
_diffrn_measurement_device        'Area' 
_diffrn_radiation_monochromator   'graphite' 
_diffrn_radiation_type            'Mo K\a'
_diffrn_radiation_wavelength           0.71073
_diffrn_measurement_method        \w 
 
# If a reference occurs more than once, delete the author 
# and date from subsequent references. 
_computing_data_collection        'COLLECT (Nonius, 2001).' 
_computing_cell_refinement        'DENZO/SCALEPACK (Otwinowski & Minor, 1997)' 
_computing_data_reduction         'DENZO/SCALEPACK (Otwinowski & Minor, 1997)' 
_computing_structure_solution     'SIR92 (Altomare et al., 1994)' 
_computing_structure_refinement   'CRYSTALS (Betteridge et al., 2003)' 
_computing_publication_material   'CRYSTALS (Betteridge et al., 2003)' 
_computing_molecular_graphics     'CAMERON (Watkin et al., 1996)' 
 
_diffrn_standards_interval_time   . 
_diffrn_standards_interval_count  . 
_diffrn_standards_number          0 
_diffrn_standards_decay_%         .
 
_diffrn_ambient_temperature        150
_diffrn_reflns_number             11163 
_reflns_number_total              11163 
_diffrn_reflns_av_R_equivalents   0.026 
# Number of reflections without Friedels Law is 11163 
# Number of reflections with Friedels Law is 11163 
# Theoretical number of reflections is about 11265 
 
 
_diffrn_reflns_theta_min          5.113 
_diffrn_reflns_theta_max          27.462 
_diffrn_measured_fraction_theta_max 0.991 
 
_diffrn_reflns_theta_full         26.913 
_diffrn_measured_fraction_theta_full 0.992 
 
 
_diffrn_reflns_limit_h_min        -16 
_diffrn_reflns_limit_h_max        15 
_diffrn_reflns_limit_k_min        -17 
_diffrn_reflns_limit_k_max        17 
_diffrn_reflns_limit_l_min        0 
_diffrn_reflns_limit_l_max        20 
_reflns_limit_h_min               -16 
_reflns_limit_h_max               15 
_reflns_limit_k_min               -17 
_reflns_limit_k_max               17 
_reflns_limit_l_min               0 
_reflns_limit_l_max               20 
 
_oxford_diffrn_Wilson_B_factor    2.49 
_oxford_diffrn_Wilson_scale       4.29 
 
_atom_sites_solution_primary      direct #heavy,direct,difmap,geom
# _atom_sites_solution_secondary  difmap
_atom_sites_solution_hydrogens    geom
 
_refine_diff_density_min          -0.52 
_refine_diff_density_max          0.46 
 
 
# The current dictionary definitions do not cover the 
# situation where the reflections used for refinement were 
# selected by a user-defined sigma threshold 
 
 
# The values actually used during refinement 
_oxford_reflns_threshold_expression_ref     I>-3.0\s(I)
_refine_ls_number_reflns          11159 
_refine_ls_number_restraints      400 
_refine_ls_number_parameters      578 
_oxford_refine_ls_R_factor_ref    0.0706 
_refine_ls_wR_factor_ref          0.1663 
_refine_ls_goodness_of_fit_ref    0.9553 
_refine_ls_shift/su_max           0.0096618 
_refine_ls_shift/su_mean          3.1069937 
 
 
# The values computed from all data 
_oxford_reflns_number_all         11160 
_refine_ls_R_factor_all           0.0706 
_refine_ls_wR_factor_all          0.1663 
 
# The values computed with a 2 sigma cutoff - a la SHELX 
_reflns_threshold_expression      I>2.0\s(I)
_reflns_number_gt                 8629 
_refine_ls_R_factor_gt            0.0531 
_refine_ls_wR_factor_gt           0.1537 
 
# choose from: rm (reference molecule of known chirality), 
# ad (anomolous dispersion - Flack), rmad (rm and ad), 
# syn (from synthesis), unk (unknown) or . (not applicable). 
_chemical_absolute_configuration  '.' 
 
 
_refine_ls_structure_factor_coef  Fsqd 
_refine_ls_matrix_type            full
_refine_ls_hydrogen_treatment     none           # none, undef, noref, refall,
                                                 # refxyz, refU, constr or mixed
_refine_ls_weighting_scheme       calc 
_refine_ls_weighting_details 
;
 Method= Modified Sheldrick 
 w=1/[\s^2^(F^2^) + ( 0.10P)^2^ + 1.45P] 
 ,where P=(max(Fo^2^,0) + 2Fc^2^)/3 
;
# Insert your own references if required - in alphabetical order 
_publ_section_references 
; 
Altomare, A., Cascarano, G., Giacovazzo, C., Guagliardi, A., Burla, M.C., 
Polidori, G. & Camalli, M. (1994). J. Appl. Cryst. 27, 435. 
 
Betteridge, P.W., Carruthers, J.R., Cooper, R.I., 
Prout, K. & Watkin, D.J. (2003). J. Appl. Cryst. 36, 1487. 
 
Nonius (2001). COLLECT. Nonius BV, Delft, The Netherlands. 
 
Otwinowski, Z. & Minor, W. (1997). Methods in Enzymology, Vol. 276, 
edited by C. W. Carter Jr & R. M. Sweet, pp. 307--326. 
New York: Academic Press. 
 
Watkin, D.J., Prout, C.K. & Pearce, L.J. (1996). CAMERON, Chemical 
Crystallography Laboratory, Oxford, UK. 
; 

# Uequiv = arithmetic mean of Ui i.e. Ueqiv = (U1+U2+U3)/3

# Replace last . with number of unfound hydrogen atomsattached to an atom.

# ..._refinement_flags_... 
# . no refinement constraints           S special position constraint on site
# G rigid group refinement of site      R riding atom
# D distance or angle restraint on site T thermal displacement constraints
# U Uiso or Uij restraint (rigid bond)  P partial occupancy constraint


loop_
_atom_site_label
_atom_site_type_symbol
_atom_site_fract_x
_atom_site_fract_y
_atom_site_fract_z
_atom_site_U_iso_or_equiv
_atom_site_occupancy
_atom_site_adp_type
_atom_site_refinement_flags_posn
_atom_site_refinement_flags_adp
_atom_site_refinement_flags_occupancy
_atom_site_disorder_assembly
_atom_site_disorder_group
_oxford_atom_site_special_shape
_atom_site_attached_hydrogens
Fe1 Fe 0.47997(2) 0.30599(2) 0.77972(2) 0.0287 1.0000 Uani . . . . . . . 
C2 C 0.37421(17) 0.18141(15) 0.68931(14) 0.0256 1.0000 Uani . . . . . . . 
C3 C 0.48865(17) 0.15328(16) 0.72295(14) 0.0271 1.0000 Uani . . . . . . . 
C4 C 0.54970(17) 0.22837(17) 0.69752(15) 0.0294 1.0000 Uani . . . . . . . 
C5 C 0.47351(18) 0.29738(17) 0.64842(15) 0.0305 1.0000 Uani . . . . . . . 
C6 C 0.36103(17) 0.26801(15) 0.63990(14) 0.0266 1.0000 Uani . . . . . . . 
B7 B 0.24980(19) 0.30935(17) 0.57676(15) 0.0251 1.0000 Uani . . . . . . . 
C8 C 0.25222(16) 0.41163(15) 0.53417(14) 0.0246 1.0000 Uani . . . . . . . 
C9 C 0.31489(17) 0.42766(16) 0.47941(14) 0.0272 1.0000 Uani . . . . . . . 
C10 C 0.37232(19) 0.34537(17) 0.44258(15) 0.0314 1.0000 Uani . . . . . . . 
C11 C 0.31861(19) 0.52206(17) 0.44996(16) 0.0323 1.0000 Uani . . . . . . . 
C12 C 0.2615(2) 0.60221(17) 0.47128(17) 0.0343 1.0000 Uani . . . . . . . 
C13 C 0.19645(18) 0.58515(16) 0.52215(16) 0.0307 1.0000 Uani . . . . . . . 
C14 C 0.18980(16) 0.49244(15) 0.55251(14) 0.0256 1.0000 Uani . . . . . . . 
C15 C 0.11370(19) 0.48054(17) 0.60439(16) 0.0321 1.0000 Uani . . . . . . . 
C16 C 0.2665(3) 0.7027(2) 0.4379(2) 0.0500 1.0000 Uani . . . . . . . 
C17 C 0.13423(17) 0.24400(15) 0.54816(14) 0.0256 1.0000 Uani . . . . . . . 
C18 C 0.07346(18) 0.20621(16) 0.45258(15) 0.0285 1.0000 Uani . . . . . . . 
C19 C -0.02449(18) 0.14353(16) 0.42544(15) 0.0305 1.0000 Uani . . . . . . . 
C20 C -0.06703(17) 0.11639(16) 0.48943(16) 0.0291 1.0000 Uani . . . . . . . 
C21 C -0.17145(18) 0.04715(17) 0.45767(17) 0.0342 1.0000 Uani . . . . . . . 
C22 C -0.00864(17) 0.15480(16) 0.58261(15) 0.0291 1.0000 Uani . . . . . . . 
C23 C 0.09066(17) 0.21652(15) 0.61253(15) 0.0272 1.0000 Uani . . . . . . . 
C24 C 0.1440(2) 0.25648(18) 0.71610(15) 0.0351 1.0000 Uani . . . . . . . 
C25 C 0.1129(2) 0.2282(2) 0.37685(16) 0.0415 1.0000 Uani . . . . . . . 
B26 B 0.5334(2) 0.05156(18) 0.75794(15) 0.0267 1.0000 Uani . . . . . . . 
C27 C 0.45227(17) -0.03317(16) 0.76728(14) 0.0268 1.0000 Uani . . . . . . . 
C28 C 0.38644(18) -0.01482(16) 0.82153(15) 0.0284 1.0000 Uani . . . . . . . 
C29 C 0.4006(2) 0.08255(17) 0.88568(16) 0.0353 1.0000 Uani . . . . . . . 
C30 C 0.3104(2) -0.08967(17) 0.82188(15) 0.0330 1.0000 Uani . . . . . . . 
C31 C 0.2952(2) -0.18435(17) 0.77066(16) 0.0333 1.0000 Uani . . . . . . . 
C32 C 0.3611(2) -0.20400(17) 0.71887(16) 0.0339 1.0000 Uani . . . . . . . 
C33 C 0.43861(19) -0.13157(17) 0.71671(16) 0.0324 1.0000 Uani . . . . . . . 
C34 C 0.5022(3) -0.1615(2) 0.6546(2) 0.0522 1.0000 Uani . . . . . . . 
C35 C 0.2098(2) -0.2628(2) 0.77016(19) 0.0464 1.0000 Uani . . . . . . . 
C36 C 0.66011(17) 0.03209(17) 0.77273(14) 0.0284 1.0000 Uani . . . . . . . 
C37 C 0.70158(18) 0.03410(17) 0.70160(15) 0.0305 1.0000 Uani . . . . . . . 
C38 C 0.6254(2) 0.03920(19) 0.60100(15) 0.0354 1.0000 Uani . . . . . . . 
C39 C 0.81536(19) 0.02461(19) 0.72085(16) 0.0363 1.0000 Uani . . . . . . . 
C40 C 0.8924(2) 0.0143(2) 0.80988(18) 0.0433 1.0000 Uani . . . . . . . 
C41 C 0.8508(2) 0.0088(2) 0.87897(17) 0.0466 1.0000 Uani . . . . . . . 
C42 C 0.73683(19) 0.0149(2) 0.86202(16) 0.0369 1.0000 Uani . . . . . . . 
C43 C 0.6984(2) 0.0017(3) 0.93996(18) 0.0513 1.0000 Uani . . . . . . . 
C44 C 1.0163(2) 0.0067(3) 0.8297(2) 0.0621 1.0000 Uani . . . . . . . 
C50 C 0.5913(3) 0.3371(3) 0.9159(3) 0.0403 0.622(9) Uani D . P 1 1 . . 
C51 C 0.4801(3) 0.3584(3) 0.9099(3) 0.0416 0.622(9) Uani D . P 1 1 . . 
C52 C 0.4408(3) 0.4319(3) 0.8491(3) 0.0452 0.622(9) Uani D . P 1 1 . . 
C53 C 0.5251(4) 0.4574(3) 0.8172(3) 0.0468 0.622(9) Uani D . P 1 1 . . 
C54 C 0.6195(3) 0.3996(4) 0.8595(3) 0.0450 0.622(9) Uani D . P 1 1 . . 
C55 C 0.7315(4) 0.4035(5) 0.8497(4) 0.0670 0.622(9) Uani D . P 1 1 . . 
C56 C 0.5195(6) 0.5367(4) 0.7545(3) 0.0696 0.622(9) Uani D . P 1 1 . . 
C57 C 0.3341(4) 0.4851(4) 0.8322(4) 0.0706 0.622(9) Uani D . P 1 1 . . 
C58 C 0.4235(5) 0.3216(4) 0.9695(4) 0.0566 0.622(9) Uani D . P 1 1 . . 
C59 C 0.6699(5) 0.2680(4) 0.9759(3) 0.0584 0.622(9) Uani D . P 1 1 . . 
C60 C 0.6057(4) 0.3476(5) 0.9154(5) 0.0372 0.378(9) Uani D . P 1 2 . . 
C61 C 0.5018(5) 0.3480(4) 0.9282(4) 0.0362 0.378(9) Uani D . P 1 2 . . 
C62 C 0.4342(4) 0.4174(4) 0.8729(4) 0.0335 0.378(9) Uani D . P 1 2 . . 
C63 C 0.4947(5) 0.4618(5) 0.8273(4) 0.0370 0.378(9) Uani D . P 1 2 . . 
C64 C 0.6016(5) 0.4187(5) 0.8533(5) 0.0382 0.378(9) Uani D . P 1 2 . . 
C65 C 0.6966(6) 0.4436(6) 0.8238(5) 0.0524 0.378(9) Uani D . P 1 2 . . 
C66 C 0.4539(7) 0.5416(5) 0.7624(4) 0.0489 0.378(9) Uani D . P 1 2 . . 
C67 C 0.3232(5) 0.4490(6) 0.8732(5) 0.0476 0.378(9) Uani D . P 1 2 . . 
C68 C 0.4757(8) 0.2953(5) 0.9982(4) 0.0502 0.378(9) Uani D . P 1 2 . . 
C69 C 0.7059(6) 0.2881(6) 0.9617(5) 0.0565 0.378(9) Uani D . P 1 2 . . 
H21 H 0.3135 0.1421 0.6970 0.0265 1.0000 Uiso R . . . . . . 
H41 H 0.6321 0.2301 0.7122 0.0327 1.0000 Uiso R . . . . . . 
H51 H 0.4949 0.3541 0.6248 0.0341 1.0000 Uiso R . . . . . . 
H103 H 0.4455 0.3684 0.4582 0.0445 1.0000 Uiso R . . . . . . 
H102 H 0.3686 0.2839 0.4692 0.0426 1.0000 Uiso R . . . . . . 
H101 H 0.3335 0.3341 0.3748 0.0443 1.0000 Uiso R . . . . . . 
H111 H 0.3637 0.5323 0.4129 0.0376 1.0000 Uiso R . . . . . . 
H131 H 0.1567 0.6381 0.5373 0.0343 1.0000 Uiso R . . . . . . 
H153 H 0.0797 0.5439 0.6117 0.0443 1.0000 Uiso R . . . . . . 
H152 H 0.1531 0.4579 0.6648 0.0435 1.0000 Uiso R . . . . . . 
H151 H 0.0538 0.4301 0.5669 0.0434 1.0000 Uiso R . . . . . . 
H161 H 0.2539 0.7564 0.4782 0.0725 1.0000 Uiso R . . . . . . 
H162 H 0.3392 0.7148 0.4371 0.0718 1.0000 Uiso R . . . . . . 
H163 H 0.2136 0.6989 0.3770 0.0729 1.0000 Uiso R . . . . . . 
H191 H -0.0637 0.1177 0.3607 0.0337 1.0000 Uiso R . . . . . . 
H211 H -0.2113 0.0663 0.4975 0.0518 1.0000 Uiso R . . . . . . 
H212 H -0.2210 0.0503 0.3936 0.0503 1.0000 Uiso R . . . . . . 
H213 H -0.1511 -0.0197 0.4620 0.0513 1.0000 Uiso R . . . . . . 
H221 H -0.0374 0.1366 0.6290 0.0309 1.0000 Uiso R . . . . . . 
H243 H 0.1525 0.2020 0.7526 0.0485 1.0000 Uiso R . . . . . . 
H242 H 0.0963 0.3028 0.7322 0.0494 1.0000 Uiso R . . . . . . 
H241 H 0.2194 0.2896 0.7336 0.0472 1.0000 Uiso R . . . . . . 
H251 H 0.0615 0.1977 0.3165 0.0610 1.0000 Uiso R . . . . . . 
H252 H 0.1184 0.3007 0.3727 0.0587 1.0000 Uiso R . . . . . . 
H253 H 0.1857 0.2030 0.3835 0.0603 1.0000 Uiso R . . . . . . 
H293 H 0.3271 0.1010 0.8836 0.0520 1.0000 Uiso R . . . . . . 
H292 H 0.4487 0.0738 0.9489 0.0526 1.0000 Uiso R . . . . . . 
H291 H 0.4320 0.1362 0.8676 0.0531 1.0000 Uiso R . . . . . . 
H301 H 0.2689 -0.0735 0.8615 0.0357 1.0000 Uiso R . . . . . . 
H321 H 0.3519 -0.2692 0.6842 0.0382 1.0000 Uiso R . . . . . . 
H343 H 0.4861 -0.2355 0.6366 0.0769 1.0000 Uiso R . . . . . . 
H342 H 0.5805 -0.1504 0.6967 0.0770 1.0000 Uiso R . . . . . . 
H341 H 0.4820 -0.1244 0.5984 0.0783 1.0000 Uiso R . . . . . . 
H351 H 0.1916 -0.3153 0.7173 0.0689 1.0000 Uiso R . . . . . . 
H352 H 0.2338 -0.2942 0.8251 0.0690 1.0000 Uiso R . . . . . . 
H353 H 0.1404 -0.2351 0.7654 0.0688 1.0000 Uiso R . . . . . . 
H383 H 0.6567 0.0933 0.5746 0.0522 1.0000 Uiso R . . . . . . 
H382 H 0.5490 0.0542 0.5968 0.0520 1.0000 Uiso R . . . . . . 
H381 H 0.6238 -0.0269 0.5649 0.0517 1.0000 Uiso R . . . . . . 
H391 H 0.8423 0.0278 0.6725 0.0418 1.0000 Uiso R . . . . . . 
H411 H 0.9016 0.0005 0.9391 0.0536 1.0000 Uiso R . . . . . . 
H433 H 0.7603 -0.0013 1.0005 0.0759 1.0000 Uiso R . . . . . . 
H432 H 0.6481 0.0534 0.9457 0.0772 1.0000 Uiso R . . . . . . 
H431 H 0.6548 -0.0611 0.9234 0.0768 1.0000 Uiso R . . . . . . 
H441 H 1.0618 0.0525 0.8856 0.0902 1.0000 Uiso R . . . . . . 
H442 H 1.0348 0.0217 0.7772 0.0904 1.0000 Uiso R . . . . . . 
H443 H 1.0367 -0.0614 0.8404 0.0896 1.0000 Uiso R . . . . . . 
H551 H 0.7249 0.4201 0.7898 0.0873 0.622(9) Uiso R . P 1 1 . . 
H552 H 0.7799 0.4541 0.8976 0.0870 0.622(9) Uiso R . P 1 1 . . 
H553 H 0.7664 0.3399 0.8608 0.0867 0.622(9) Uiso R . P 1 1 . . 
H563 H 0.5814 0.5237 0.7345 0.0941 0.622(9) Uiso R . P 1 1 . . 
H562 H 0.5316 0.6014 0.7938 0.0939 0.622(9) Uiso R . P 1 1 . . 
H561 H 0.4454 0.5270 0.7031 0.0940 0.622(9) Uiso R . P 1 1 . . 
H571 H 0.3270 0.5289 0.7855 0.0935 0.622(9) Uiso R . P 1 1 . . 
H572 H 0.3380 0.5258 0.8889 0.0929 0.622(9) Uiso R . P 1 1 . . 
H573 H 0.2718 0.4338 0.8099 0.0931 0.622(9) Uiso R . P 1 1 . . 
H583 H 0.3422 0.3131 0.9350 0.0727 0.622(9) Uiso R . P 1 1 . . 
H582 H 0.4360 0.3693 1.0226 0.0733 0.622(9) Uiso R . P 1 1 . . 
H581 H 0.4496 0.2568 0.9907 0.0739 0.622(9) Uiso R . P 1 1 . . 
H591 H 0.6990 0.2226 0.9383 0.0821 0.622(9) Uiso R . P 1 1 . . 
H592 H 0.7317 0.3106 1.0227 0.0821 0.622(9) Uiso R . P 1 1 . . 
H593 H 0.6305 0.2296 1.0053 0.0816 0.622(9) Uiso R . P 1 1 . . 
H653 H 0.6647 0.4623 0.7622 0.0740 0.378(9) Uiso R . P 1 2 . . 
H652 H 0.7413 0.4997 0.8667 0.0739 0.378(9) Uiso R . P 1 2 . . 
H651 H 0.7431 0.3864 0.8264 0.0745 0.378(9) Uiso R . P 1 2 . . 
H661 H 0.4923 0.5335 0.7205 0.0775 0.378(9) Uiso R . P 1 2 . . 
H662 H 0.4714 0.6082 0.7988 0.0769 0.378(9) Uiso R . P 1 2 . . 
H663 H 0.3740 0.5300 0.7274 0.0769 0.378(9) Uiso R . P 1 2 . . 
H673 H 0.2824 0.4805 0.8182 0.0696 0.378(9) Uiso R . P 1 2 . . 
H672 H 0.3364 0.4962 0.9287 0.0690 0.378(9) Uiso R . P 1 2 . . 
H671 H 0.2792 0.3905 0.8743 0.0688 0.378(9) Uiso R . P 1 2 . . 
H683 H 0.3965 0.2695 0.9736 0.0709 0.378(9) Uiso R . P 1 2 . . 
H682 H 0.4918 0.3409 1.0543 0.0713 0.378(9) Uiso R . P 1 2 . . 
H681 H 0.5250 0.2402 1.0147 0.0708 0.378(9) Uiso R . P 1 2 . . 
H691 H 0.7720 0.3282 0.9688 0.0759 0.378(9) Uiso R . P 1 2 . . 
H692 H 0.7075 0.2781 1.0218 0.0763 0.378(9) Uiso R . P 1 2 . . 
H693 H 0.7006 0.2240 0.9235 0.0762 0.378(9) Uiso R . P 1 2 . . 
loop_
_atom_site_aniso_label
_atom_site_aniso_U_11
_atom_site_aniso_U_22
_atom_site_aniso_U_33
_atom_site_aniso_U_23
_atom_site_aniso_U_13
_atom_site_aniso_U_12
Fe1 0.02570(17) 0.02658(17) 0.02747(17) 0.00247(12) 0.00362(12) -0.00215(11) 
C2 0.0242(9) 0.0256(10) 0.0239(9) 0.0010(8) 0.0067(8) 0.0001(8) 
C3 0.0248(10) 0.0291(10) 0.0248(10) 0.0032(8) 0.0071(8) 0.0005(8) 
C4 0.0221(10) 0.0343(11) 0.0299(10) 0.0079(9) 0.0067(8) 0.0002(8) 
C5 0.0271(10) 0.0306(11) 0.0316(11) 0.0086(9) 0.0078(9) -0.0021(8) 
C6 0.0259(10) 0.0249(10) 0.0250(10) 0.0015(8) 0.0059(8) -0.0029(8) 
B7 0.0273(11) 0.0250(11) 0.0217(10) 0.0004(8) 0.0090(9) 0.0015(9) 
C8 0.0221(9) 0.0252(10) 0.0232(9) 0.0023(7) 0.0056(8) 0.0002(7) 
C9 0.0244(10) 0.0299(10) 0.0253(10) 0.0038(8) 0.0076(8) 0.0005(8) 
C10 0.0321(11) 0.0337(11) 0.0303(11) 0.0025(9) 0.0146(9) 0.0036(9) 
C11 0.0326(11) 0.0355(12) 0.0341(11) 0.0100(9) 0.0172(9) 0.0021(9) 
C12 0.0360(12) 0.0282(11) 0.0410(12) 0.0097(9) 0.0160(10) 0.0017(9) 
C13 0.0279(10) 0.0268(10) 0.0377(12) 0.0035(9) 0.0131(9) 0.0043(8) 
C14 0.0208(9) 0.0264(10) 0.0265(10) 0.0014(8) 0.0065(8) 0.0001(7) 
C15 0.0312(11) 0.0310(11) 0.0371(12) 0.0041(9) 0.0166(10) 0.0048(9) 
C16 0.0582(17) 0.0349(13) 0.0714(19) 0.0226(13) 0.0364(15) 0.0096(12) 
C17 0.0237(9) 0.0229(9) 0.0286(10) 0.0046(8) 0.0079(8) 0.0012(7) 
C18 0.0264(10) 0.0291(10) 0.0266(10) 0.0038(8) 0.0067(8) -0.0007(8) 
C19 0.0272(10) 0.0293(11) 0.0295(10) 0.0025(8) 0.0055(9) -0.0019(8) 
C20 0.0230(10) 0.0236(10) 0.0385(11) 0.0065(8) 0.0087(9) 0.0030(8) 
C21 0.0261(10) 0.0300(11) 0.0425(13) 0.0057(9) 0.0086(9) -0.0022(8) 
C22 0.0261(10) 0.0280(10) 0.0351(11) 0.0066(8) 0.0134(9) 0.0029(8) 
C23 0.0266(10) 0.0252(10) 0.0289(10) 0.0042(8) 0.0097(8) 0.0027(8) 
C24 0.0366(12) 0.0401(12) 0.0278(11) 0.0021(9) 0.0125(9) -0.0038(10) 
C25 0.0432(13) 0.0494(14) 0.0262(11) -0.0006(10) 0.0094(10) -0.0158(11) 
B26 0.0278(11) 0.0320(12) 0.0187(10) 0.0033(9) 0.0073(9) 0.0053(9) 
C27 0.0263(10) 0.0295(10) 0.0248(10) 0.0069(8) 0.0090(8) 0.0078(8) 
C28 0.0328(11) 0.0283(10) 0.0264(10) 0.0063(8) 0.0129(9) 0.0052(8) 
C29 0.0476(13) 0.0322(11) 0.0319(11) 0.0019(9) 0.0226(10) 0.0009(10) 
C30 0.0394(12) 0.0345(12) 0.0290(11) 0.0071(9) 0.0166(10) 0.0029(9) 
C31 0.0385(12) 0.0288(11) 0.0303(11) 0.0092(9) 0.0092(9) 0.0015(9) 
C32 0.0390(12) 0.0252(10) 0.0340(11) 0.0027(8) 0.0106(10) 0.0070(9) 
C33 0.0310(11) 0.0307(11) 0.0331(11) 0.0017(9) 0.0105(9) 0.0075(9) 
C34 0.0529(16) 0.0433(15) 0.0639(18) -0.0186(13) 0.0340(14) -0.0021(12) 
C35 0.0582(16) 0.0353(13) 0.0456(14) 0.0089(11) 0.0195(13) -0.0081(11) 
C36 0.0266(10) 0.0342(11) 0.0233(10) 0.0052(8) 0.0081(8) 0.0045(8) 
C37 0.0283(10) 0.0374(12) 0.0245(10) 0.0056(9) 0.0082(8) 0.0036(9) 
C38 0.0351(12) 0.0459(13) 0.0242(10) 0.0056(9) 0.0104(9) 0.0057(10) 
C39 0.0314(11) 0.0500(14) 0.0299(11) 0.0049(10) 0.0145(9) 0.0025(10) 
C40 0.0255(11) 0.0675(17) 0.0345(12) 0.0065(11) 0.0092(10) 0.0051(11) 
C41 0.0291(12) 0.081(2) 0.0276(11) 0.0115(12) 0.0067(10) 0.0126(12) 
C42 0.0303(11) 0.0547(15) 0.0249(11) 0.0082(10) 0.0088(9) 0.0097(10) 
C43 0.0410(14) 0.089(2) 0.0293(12) 0.0219(13) 0.0152(11) 0.0230(14) 
C44 0.0281(13) 0.111(3) 0.0448(15) 0.0108(17) 0.0110(12) 0.0093(15) 
C50 0.043(2) 0.033(2) 0.028(2) -0.0028(19) -0.0023(19) -0.0061(19) 
C51 0.047(2) 0.041(2) 0.028(2) -0.0124(17) 0.0113(18) -0.0160(19) 
C52 0.047(2) 0.037(2) 0.035(2) -0.0123(18) 0.0017(18) 0.0033(19) 
C53 0.065(3) 0.031(2) 0.032(2) -0.0022(17) 0.007(2) -0.008(2) 
C54 0.042(2) 0.043(2) 0.039(2) -0.0066(19) 0.0073(19) -0.0139(19) 
C55 0.044(3) 0.082(4) 0.063(3) -0.004(3) 0.012(2) -0.023(3) 
C56 0.104(5) 0.034(2) 0.048(3) 0.0018(19) 0.007(3) -0.013(3) 
C57 0.062(3) 0.050(3) 0.069(4) -0.024(3) 0.001(3) 0.014(2) 
C58 0.073(4) 0.052(3) 0.046(3) -0.019(2) 0.033(3) -0.018(3) 
C59 0.057(3) 0.052(3) 0.037(2) 0.003(2) -0.013(2) -0.002(2) 
C60 0.030(3) 0.036(3) 0.032(4) -0.002(3) -0.002(3) -0.001(3) 
C61 0.046(3) 0.033(3) 0.022(3) -0.003(2) 0.008(2) -0.007(3) 
C62 0.036(3) 0.028(3) 0.028(3) -0.008(2) 0.006(2) -0.003(2) 
C63 0.044(3) 0.023(3) 0.030(3) 0.001(2) 0.000(3) -0.004(2) 
C64 0.033(3) 0.037(3) 0.036(3) 0.000(3) 0.005(3) -0.016(3) 
C65 0.038(4) 0.055(4) 0.058(4) -0.006(4) 0.016(3) -0.026(3) 
C66 0.062(5) 0.028(3) 0.039(3) 0.004(3) 0.001(3) -0.001(3) 
C67 0.041(3) 0.045(4) 0.042(4) -0.024(3) 0.009(3) 0.001(3) 
C68 0.070(5) 0.046(4) 0.024(3) -0.007(3) 0.010(3) -0.019(4) 
C69 0.037(4) 0.045(4) 0.054(5) 0.002(4) -0.017(4) 0.001(3) 

_refine_ls_extinction_method 
    'None'
_oxford_refine_ls_scale 0.4747(8) 
loop_
 _geom_bond_atom_site_label_1
 _geom_bond_site_symmetry_1
 _geom_bond_atom_site_label_2
 _geom_bond_site_symmetry_2
 _geom_bond_distance
 _geom_bond_publ_flag
Fe1 . C2 . 2.127(2)    yes
Fe1 . C3 . 2.143(2)    yes
Fe1 . C4 . 2.029(2)    yes
Fe1 . C5 . 2.012(2)    yes
Fe1 . C6 . 2.130(2)    yes
Fe1 . C50 . 2.050(4)    yes
Fe1 . C51 . 2.071(4)    yes
Fe1 . C52 . 2.062(4)    yes
Fe1 . C53 . 2.046(4)    yes
Fe1 . C54 . 2.051(5)    yes
Fe1 . C2 . 2.127(2)    yes
Fe1 . C3 . 2.143(2)    yes
Fe1 . C4 . 2.029(2)    yes
Fe1 . C5 . 2.012(2)    yes
Fe1 . C6 . 2.130(2)    yes
Fe1 . C60 . 2.121(7)    yes
Fe1 . C61 . 2.229(5)    yes
Fe1 . C62 . 2.199(5)    yes
Fe1 . C63 . 2.101(6)    yes
Fe1 . C64 . 2.047(7)    yes
C2 . C3 . 1.436(3)    yes
C2 . C6 . 1.442(3)    yes
C2 . H21 . 0.990    no
C3 . C4 . 1.449(3)    yes
C3 . B26 . 1.558(3)    yes
C4 . C5 . 1.419(3)    yes
C4 . H41 . 0.997    no
C5 . C6 . 1.450(3)    yes
C5 . H51 . 0.961    no
C6 . B7 . 1.549(3)    yes
B7 . C8 . 1.593(3)    yes
B7 . C17 . 1.596(3)    yes
C8 . C9 . 1.415(3)    yes
C8 . C14 . 1.419(3)    yes
C9 . C10 . 1.509(3)    yes
C9 . C11 . 1.398(3)    yes
C10 . H103 . 0.919    no
C10 . H102 . 0.972    no
C10 . H101 . 0.974    no
C11 . C12 . 1.385(3)    yes
C11 . H111 . 0.984    no
C12 . C13 . 1.392(3)    yes
C12 . C16 . 1.506(3)    yes
C13 . C14 . 1.390(3)    yes
C13 . H131 . 0.937    no
C14 . C15 . 1.511(3)    yes
C15 . H153 . 0.971    no
C15 . H152 . 0.972    no
C15 . H151 . 0.969    no
C16 . H161 . 0.952    no
C16 . H162 . 0.954    no
C16 . H163 . 0.929    no
C17 . C18 . 1.419(3)    yes
C17 . C23 . 1.408(3)    yes
C18 . C19 . 1.398(3)    yes
C18 . C25 . 1.513(3)    yes
C19 . C20 . 1.392(3)    yes
C19 . H191 . 0.958    no
C20 . C21 . 1.504(3)    yes
C20 . C22 . 1.387(3)    yes
C21 . H211 . 0.963    no
C21 . H212 . 0.966    no
C21 . H213 . 0.935    no
C22 . C23 . 1.400(3)    yes
C22 . H221 . 0.985    no
C23 . C24 . 1.520(3)    yes
C24 . H243 . 0.959    no
C24 . H242 . 0.956    no
C24 . H241 . 0.987    no
C25 . H251 . 0.958    no
C25 . H252 . 0.980    no
C25 . H253 . 0.972    no
B26 . C27 . 1.589(3)    yes
B26 . C36 . 1.589(3)    yes
C27 . C28 . 1.417(3)    yes
C27 . C33 . 1.420(3)    yes
C28 . C29 . 1.505(3)    yes
C28 . C30 . 1.393(3)    yes
C29 . H293 . 0.970    no
C29 . H292 . 0.968    no
C29 . H291 . 0.941    no
C30 . C31 . 1.380(3)    yes
C30 . H301 . 0.970    no
C31 . C32 . 1.388(3)    yes
C31 . C35 . 1.508(3)    yes
C32 . C33 . 1.395(3)    yes
C32 . H321 . 0.948    no
C33 . C34 . 1.516(3)    yes
C34 . H343 . 0.990    no
C34 . H342 . 0.970    no
C34 . H341 . 1.008    no
C35 . H351 . 0.968    no
C35 . H352 . 0.946    no
C35 . H353 . 0.952    no
C36 . C37 . 1.410(3)    yes
C36 . C42 . 1.416(3)    yes
C37 . C38 . 1.512(3)    yes
C37 . C39 . 1.391(3)    yes
C38 . H383 . 1.024    no
C38 . H382 . 0.987    no
C38 . H381 . 0.984    no
C39 . C40 . 1.391(3)    yes
C39 . H391 . 0.951    no
C40 . C41 . 1.386(4)    yes
C40 . C44 . 1.514(3)    yes
C41 . C42 . 1.396(3)    yes
C41 . H411 . 0.938    no
C42 . C43 . 1.508(3)    yes
C43 . H433 . 0.982    no
C43 . H432 . 0.971    no
C43 . H431 . 0.954    no
C44 . H441 . 0.975    no
C44 . H442 . 0.979    no
C44 . H443 . 0.965    no
C50 . C51 . 1.435(4)    yes
C50 . C54 . 1.422(4)    yes
C50 . C59 . 1.503(5)    yes
C51 . C52 . 1.410(4)    yes
C51 . C58 . 1.505(5)    yes
C52 . C53 . 1.413(4)    yes
C52 . C57 . 1.502(5)    yes
C53 . C54 . 1.428(4)    yes
C53 . C56 . 1.510(5)    yes
C54 . C55 . 1.512(5)    yes
C55 . H551 . 0.960    no
C55 . H552 . 0.957    no
C55 . H553 . 0.967    no
C56 . H563 . 0.973    no
C56 . H562 . 0.971    no
C56 . H561 . 0.980    no
C57 . H571 . 0.966    no
C57 . H572 . 0.966    no
C57 . H573 . 0.976    no
C58 . H583 . 0.976    no
C58 . H582 . 0.942    no
C58 . H581 . 0.979    no
C59 . H591 . 0.970    no
C59 . H592 . 0.967    no
C59 . H593 . 0.981    no
C60 . C61 . 1.430(5)    yes
C60 . C64 . 1.423(5)    yes
C60 . C69 . 1.506(6)    yes
C61 . C62 . 1.413(4)    yes
C61 . C68 . 1.506(6)    yes
C62 . C63 . 1.409(5)    yes
C62 . C67 . 1.498(6)    yes
C63 . C64 . 1.429(5)    yes
C63 . C66 . 1.517(6)    yes
C64 . C65 . 1.512(6)    yes
C65 . H653 . 0.958    no
C65 . H652 . 0.956    no
C65 . H651 . 0.970    no
C66 . H661 . 0.959    no
C66 . H662 . 0.969    no
C66 . H663 . 0.964    no
C67 . H673 . 0.968    no
C67 . H672 . 0.965    no
C67 . H671 . 0.965    no
C68 . H683 . 0.984    no
C68 . H682 . 0.954    no
C68 . H681 . 0.971    no
C69 . H691 . 0.963    no
C69 . H692 . 0.958    no
C69 . H693 . 0.968    no
loop_
 _geom_angle_atom_site_label_1
 _geom_angle_site_symmetry_1
 _geom_angle_atom_site_label_2
 _geom_angle_site_symmetry_2
 _geom_angle_atom_site_label_3
 _geom_angle_site_symmetry_3
 _geom_angle
 _geom_angle_publ_flag
C2 . Fe1 . C3 . 39.30(7)    yes
C2 . Fe1 . C4 . 66.93(8)    yes
C3 . Fe1 . C4 . 40.53(8)    yes
C2 . Fe1 . C5 . 67.26(8)    yes
C3 . Fe1 . C5 . 68.38(8)    yes
C4 . Fe1 . C5 . 41.12(8)    yes
C2 . Fe1 . C6 . 39.59(8)    yes
C3 . Fe1 . C6 . 67.50(8)    yes
C4 . Fe1 . C6 . 68.44(8)    yes
C5 . Fe1 . C6 . 40.87(8)    yes
C2 . Fe1 . C50 . 137.96(12)    yes
C3 . Fe1 . C50 . 111.06(12)    yes
C4 . Fe1 . C50 . 112.03(12)    yes
C5 . Fe1 . C50 . 141.09(12)    yes
C6 . Fe1 . C50 . 177.38(12)    yes
C2 . Fe1 . C51 . 123.62(11)    yes
C3 . Fe1 . C51 . 128.18(12)    yes
C4 . Fe1 . C51 . 151.24(13)    yes
C5 . Fe1 . C51 . 163.41(13)    yes
C6 . Fe1 . C51 . 138.23(12)    yes
C2 . Fe1 . C52 . 130.03(12)    yes
C3 . Fe1 . C52 . 162.96(15)    yes
C4 . Fe1 . C52 . 156.48(16)    yes
C5 . Fe1 . C52 . 123.84(15)    yes
C6 . Fe1 . C52 . 112.75(12)    yes
C2 . Fe1 . C53 . 152.26(12)    yes
C3 . Fe1 . C53 . 156.55(16)    yes
C4 . Fe1 . C53 . 116.63(16)    yes
C5 . Fe1 . C53 . 96.91(14)    yes
C6 . Fe1 . C53 . 113.79(12)    yes
C2 . Fe1 . C54 . 162.05(14)    yes
C3 . Fe1 . C54 . 123.25(14)    yes
C4 . Fe1 . C54 . 96.38(14)    yes
C5 . Fe1 . C54 . 105.01(13)    yes
C6 . Fe1 . C54 . 142.01(12)    yes
C50 . Fe1 . C51 . 40.74(13)    yes
C50 . Fe1 . C52 . 67.93(14)    yes
C51 . Fe1 . C52 . 39.90(12)    yes
C50 . Fe1 . C53 . 68.45(14)    yes
C51 . Fe1 . C53 . 67.82(14)    yes
C52 . Fe1 . C53 . 40.24(13)    yes
C50 . Fe1 . C54 . 40.59(12)    yes
C51 . Fe1 . C54 . 68.09(14)    yes
C52 . Fe1 . C54 . 67.89(14)    yes
C53 . Fe1 . C54 . 40.81(13)    yes
C2 . Fe1 . C3 . 39.30(7)    yes
C2 . Fe1 . C4 . 66.93(8)    yes
C3 . Fe1 . C4 . 40.53(8)    yes
C2 . Fe1 . C5 . 67.26(8)    yes
C3 . Fe1 . C5 . 68.38(8)    yes
C4 . Fe1 . C5 . 41.12(8)    yes
C2 . Fe1 . C6 . 39.59(8)    yes
C3 . Fe1 . C6 . 67.50(8)    yes
C4 . Fe1 . C6 . 68.44(8)    yes
C5 . Fe1 . C6 . 40.87(8)    yes
C2 . Fe1 . C60 . 142.70(17)    yes
C3 . Fe1 . C60 . 112.71(16)    yes
C4 . Fe1 . C60 . 109.13(16)    yes
C5 . Fe1 . C60 . 135.46(17)    yes
C6 . Fe1 . C60 . 176.26(17)    yes
C2 . Fe1 . C61 . 124.08(14)    yes
C3 . Fe1 . C61 . 122.12(14)    yes
C4 . Fe1 . C61 . 142.74(16)    yes
C5 . Fe1 . C61 . 168.14(14)    yes
C6 . Fe1 . C61 . 145.05(16)    yes
C2 . Fe1 . C62 . 125.60(14)    yes
C3 . Fe1 . C62 . 151.62(16)    yes
C4 . Fe1 . C62 . 166.78(15)    yes
C5 . Fe1 . C62 . 135.27(16)    yes
C6 . Fe1 . C62 . 117.57(14)    yes
C2 . Fe1 . C63 . 146.60(15)    yes
C3 . Fe1 . C63 . 169.66(17)    yes
C4 . Fe1 . C63 . 129.32(18)    yes
C5 . Fe1 . C63 . 104.82(17)    yes
C6 . Fe1 . C63 . 112.93(15)    yes
C2 . Fe1 . C64 . 168.95(17)    yes
C3 . Fe1 . C64 . 132.15(17)    yes
C4 . Fe1 . C64 . 102.05(18)    yes
C5 . Fe1 . C64 . 104.11(17)    yes
C6 . Fe1 . C64 . 137.08(16)    yes
C60 . Fe1 . C61 . 38.28(15)    yes
C60 . Fe1 . C62 . 64.17(17)    yes
C61 . Fe1 . C62 . 37.20(13)    yes
C60 . Fe1 . C63 . 66.14(19)    yes
C61 . Fe1 . C63 . 63.95(17)    yes
C62 . Fe1 . C63 . 38.18(14)    yes
C60 . Fe1 . C64 . 39.87(16)    yes
C61 . Fe1 . C64 . 65.07(17)    yes
C62 . Fe1 . C64 . 65.31(18)    yes
C63 . Fe1 . C64 . 40.28(16)    yes
Fe1 . C2 . C3 . 70.95(12)    yes
Fe1 . C2 . C6 . 70.31(11)    yes
C3 . C2 . C6 . 111.17(18)    yes
Fe1 . C2 . H21 . 128.8    no
C3 . C2 . H21 . 122.4    no
C6 . C2 . H21 . 126.3    no
Fe1 . C3 . C2 . 69.75(12)    yes
Fe1 . C3 . C4 . 65.52(12)    yes
C2 . C3 . C4 . 105.31(18)    yes
Fe1 . C3 . B26 . 138.95(14)    yes
C2 . C3 . B26 . 127.41(19)    yes
C4 . C3 . B26 . 125.90(19)    yes
C3 . C4 . Fe1 . 73.95(13)    yes
C3 . C4 . C5 . 109.14(18)    yes
Fe1 . C4 . C5 . 68.77(13)    yes
C3 . C4 . H41 . 124.7    no
Fe1 . C4 . H41 . 123.9    no
C5 . C4 . H41 . 126.1    no
C4 . C5 . Fe1 . 70.11(13)    yes
C4 . C5 . C6 . 109.30(18)    yes
Fe1 . C5 . C6 . 73.93(12)    yes
C4 . C5 . H51 . 124.2    no
Fe1 . C5 . H51 . 122.4    no
C6 . C5 . H51 . 126.5    no
Fe1 . C6 . C5 . 65.20(11)    yes
Fe1 . C6 . C2 . 70.10(11)    yes
C5 . C6 . C2 . 104.99(17)    yes
Fe1 . C6 . B7 . 136.28(15)    yes
C5 . C6 . B7 . 126.63(19)    yes
C2 . C6 . B7 . 127.59(18)    yes
C6 . B7 . C8 . 120.11(18)    yes
C6 . B7 . C17 . 119.34(18)    yes
C8 . B7 . C17 . 120.36(17)    yes
B7 . C8 . C9 . 123.63(18)    yes
B7 . C8 . C14 . 118.99(18)    yes
C9 . C8 . C14 . 117.37(18)    yes
C8 . C9 . C10 . 123.82(19)    yes
C8 . C9 . C11 . 120.05(19)    yes
C10 . C9 . C11 . 115.93(19)    yes
C9 . C10 . H103 . 107.8    no
C9 . C10 . H102 . 109.9    no
H103 . C10 . H102 . 111.3    no
C9 . C10 . H101 . 107.4    no
H103 . C10 . H101 . 109.6    no
H102 . C10 . H101 . 110.8    no
C9 . C11 . C12 . 122.5(2)    yes
C9 . C11 . H111 . 119.0    no
C12 . C11 . H111 . 118.5    no
C11 . C12 . C13 . 117.4(2)    yes
C11 . C12 . C16 . 121.2(2)    yes
C13 . C12 . C16 . 121.4(2)    yes
C12 . C13 . C14 . 122.1(2)    yes
C12 . C13 . H131 . 119.0    no
C14 . C13 . H131 . 118.8    no
C8 . C14 . C13 . 120.47(19)    yes
C8 . C14 . C15 . 121.50(19)    yes
C13 . C14 . C15 . 118.03(18)    yes
C14 . C15 . H153 . 109.8    no
C14 . C15 . H152 . 112.3    no
H153 . C15 . H152 . 110.6    no
C14 . C15 . H151 . 108.1    no
H153 . C15 . H151 . 107.8    no
H152 . C15 . H151 . 108.1    no
C12 . C16 . H161 . 111.2    no
C12 . C16 . H162 . 109.0    no
H161 . C16 . H162 . 108.5    no
C12 . C16 . H163 . 108.0    no
H161 . C16 . H163 . 111.8    no
H162 . C16 . H163 . 108.3    no
B7 . C17 . C18 . 118.70(18)    yes
B7 . C17 . C23 . 124.11(18)    yes
C18 . C17 . C23 . 117.11(19)    yes
C17 . C18 . C19 . 120.4(2)    yes
C17 . C18 . C25 . 122.23(19)    yes
C19 . C18 . C25 . 117.35(19)    yes
C18 . C19 . C20 . 122.3(2)    yes
C18 . C19 . H191 . 119.2    no
C20 . C19 . H191 . 118.5    no
C19 . C20 . C21 . 120.6(2)    yes
C19 . C20 . C22 . 117.29(19)    yes
C21 . C20 . C22 . 122.1(2)    yes
C20 . C21 . H211 . 108.3    no
C20 . C21 . H212 . 112.9    no
H211 . C21 . H212 . 108.8    no
C20 . C21 . H213 . 109.2    no
H211 . C21 . H213 . 110.2    no
H212 . C21 . H213 . 107.4    no
C20 . C22 . C23 . 122.0(2)    yes
C20 . C22 . H221 . 118.6    no
C23 . C22 . H221 . 119.4    no
C17 . C23 . C22 . 120.91(19)    yes
C17 . C23 . C24 . 122.35(19)    yes
C22 . C23 . C24 . 116.65(19)    yes
C23 . C24 . H243 . 110.2    no
C23 . C24 . H242 . 109.8    no
H243 . C24 . H242 . 107.4    no
C23 . C24 . H241 . 111.9    no
H243 . C24 . H241 . 107.3    no
H242 . C24 . H241 . 110.1    no
C18 . C25 . H251 . 111.2    no
C18 . C25 . H252 . 112.8    no
H251 . C25 . H252 . 105.7    no
C18 . C25 . H253 . 114.5    no
H251 . C25 . H253 . 105.6    no
H252 . C25 . H253 . 106.4    no
C3 . B26 . C27 . 121.27(18)    yes
C3 . B26 . C36 . 116.64(19)    yes
C27 . B26 . C36 . 121.75(18)    yes
B26 . C27 . C28 . 123.05(19)    yes
B26 . C27 . C33 . 120.41(18)    yes
C28 . C27 . C33 . 116.5(2)    yes
C27 . C28 . C29 . 122.0(2)    yes
C27 . C28 . C30 . 120.7(2)    yes
C29 . C28 . C30 . 117.11(19)    yes
C28 . C29 . H293 . 108.7    no
C28 . C29 . H292 . 109.9    no
H293 . C29 . H292 . 109.6    no
C28 . C29 . H291 . 112.1    no
H293 . C29 . H291 . 107.8    no
H292 . C29 . H291 . 108.7    no
C28 . C30 . C31 . 122.6(2)    yes
C28 . C30 . H301 . 117.2    no
C31 . C30 . H301 . 120.2    no
C30 . C31 . C32 . 117.2(2)    yes
C30 . C31 . C35 . 121.4(2)    yes
C32 . C31 . C35 . 121.4(2)    yes
C31 . C32 . C33 . 122.2(2)    yes
C31 . C32 . H321 . 117.7    no
C33 . C32 . H321 . 120.1    no
C27 . C33 . C32 . 120.7(2)    yes
C27 . C33 . C34 . 122.3(2)    yes
C32 . C33 . C34 . 116.9(2)    yes
C33 . C34 . H343 . 104.9    no
C33 . C34 . H342 . 103.8    no
H343 . C34 . H342 . 107.2    no
C33 . C34 . H341 . 114.4    no
H343 . C34 . H341 . 112.0    no
H342 . C34 . H341 . 113.6    no
C31 . C35 . H351 . 111.3    no
C31 . C35 . H352 . 113.1    no
H351 . C35 . H352 . 108.0    no
C31 . C35 . H353 . 112.6    no
H351 . C35 . H353 . 105.9    no
H352 . C35 . H353 . 105.5    no
B26 . C36 . C37 . 123.14(18)    yes
B26 . C36 . C42 . 119.11(19)    yes
C37 . C36 . C42 . 117.72(19)    yes
C36 . C37 . C38 . 122.45(19)    yes
C36 . C37 . C39 . 120.42(19)    yes
C38 . C37 . C39 . 117.0(2)    yes
C37 . C38 . H383 . 110.3    no
C37 . C38 . H382 . 109.8    no
H383 . C38 . H382 . 110.3    no
C37 . C38 . H381 . 107.7    no
H383 . C38 . H381 . 108.5    no
H382 . C38 . H381 . 110.2    no
C37 . C39 . C40 . 122.1(2)    yes
C37 . C39 . H391 . 119.4    no
C40 . C39 . H391 . 118.5    no
C39 . C40 . C41 . 117.4(2)    yes
C39 . C40 . C44 . 121.1(2)    yes
C41 . C40 . C44 . 121.5(2)    yes
C40 . C41 . C42 . 122.4(2)    yes
C40 . C41 . H411 . 118.3    no
C42 . C41 . H411 . 119.3    no
C36 . C42 . C41 . 119.8(2)    yes
C36 . C42 . C43 . 121.6(2)    yes
C41 . C42 . C43 . 118.6(2)    yes
C42 . C43 . H433 . 113.8    no
C42 . C43 . H432 . 111.4    no
H433 . C43 . H432 . 110.7    no
C42 . C43 . H431 . 107.6    no
H433 . C43 . H431 . 107.0    no
H432 . C43 . H431 . 105.8    no
C40 . C44 . H441 . 110.6    no
C40 . C44 . H442 . 112.2    no
H441 . C44 . H442 . 109.3    no
C40 . C44 . H443 . 109.2    no
H441 . C44 . H443 . 108.1    no
H442 . C44 . H443 . 107.3    no
Fe1 . C50 . C51 . 70.42(19)    yes
Fe1 . C50 . C54 . 69.8(2)    yes
C51 . C50 . C54 . 107.75(5)    yes
Fe1 . C50 . C59 . 128.8(3)    yes
C51 . C50 . C59 . 127.53(6)    yes
C54 . C50 . C59 . 124.57(6)    yes
C50 . C51 . Fe1 . 68.8(2)    yes
C50 . C51 . C52 . 107.68(6)    yes
Fe1 . C51 . C52 . 69.70(17)    yes
C50 . C51 . C58 . 125.80(6)    yes
Fe1 . C51 . C58 . 134.1(3)    yes
C52 . C51 . C58 . 125.85(6)    yes
C51 . C52 . Fe1 . 70.40(17)    yes
C51 . C52 . C53 . 108.88(6)    yes
Fe1 . C52 . C53 . 69.3(2)    yes
C51 . C52 . C57 . 125.28(6)    yes
Fe1 . C52 . C57 . 133.0(3)    yes
C53 . C52 . C57 . 125.29(6)    yes
C52 . C53 . Fe1 . 70.5(2)    yes
C52 . C53 . C54 . 107.87(5)    yes
Fe1 . C53 . C54 . 69.8(2)    yes
C52 . C53 . C56 . 126.07(6)    yes
Fe1 . C53 . C56 . 128.2(3)    yes
C54 . C53 . C56 . 125.95(6)    yes
C53 . C54 . C50 . 107.80(5)    yes
C53 . C54 . Fe1 . 69.4(2)    yes
C50 . C54 . Fe1 . 69.6(2)    yes
C53 . C54 . C55 . 127.56(6)    yes
C50 . C54 . C55 . 124.63(6)    yes
Fe1 . C54 . C55 . 127.4(4)    yes
C54 . C55 . H551 . 112.3    no
C54 . C55 . H552 . 107.7    no
H551 . C55 . H552 . 109.2    no
C54 . C55 . H553 . 110.3    no
H551 . C55 . H553 . 110.5    no
H552 . C55 . H553 . 106.7    no
C53 . C56 . H563 . 104.5    no
C53 . C56 . H562 . 105.7    no
H563 . C56 . H562 . 111.7    no
C53 . C56 . H561 . 107.2    no
H563 . C56 . H561 . 113.5    no
H562 . C56 . H561 . 113.4    no
C52 . C57 . H571 . 107.2    no
C52 . C57 . H572 . 110.4    no
H571 . C57 . H572 . 109.1    no
C52 . C57 . H573 . 108.0    no
H571 . C57 . H573 . 111.1    no
H572 . C57 . H573 . 111.0    no
C51 . C58 . H583 . 110.6    no
C51 . C58 . H582 . 110.7    no
H583 . C58 . H582 . 106.5    no
C51 . C58 . H581 . 112.8    no
H583 . C58 . H581 . 107.9    no
H582 . C58 . H581 . 108.2    no
C50 . C59 . H591 . 109.8    no
C50 . C59 . H592 . 106.8    no
H591 . C59 . H592 . 108.9    no
C50 . C59 . H593 . 109.9    no
H591 . C59 . H593 . 110.6    no
H592 . C59 . H593 . 110.7    no
Fe1 . C60 . C61 . 74.9(3)    yes
Fe1 . C60 . C64 . 67.3(4)    yes
C61 . C60 . C64 . 107.76(6)    yes
Fe1 . C60 . C69 . 125.4(5)    yes
C61 . C60 . C69 . 127.55(6)    yes
C64 . C60 . C69 . 124.62(6)    yes
Fe1 . C61 . C60 . 66.8(3)    yes
Fe1 . C61 . C62 . 70.2(2)    yes
C60 . C61 . C62 . 107.73(6)    yes
Fe1 . C61 . C68 . 134.7(4)    yes
C60 . C61 . C68 . 125.83(7)    yes
C62 . C61 . C68 . 125.93(7)    yes
Fe1 . C62 . C61 . 72.6(2)    yes
Fe1 . C62 . C63 . 67.2(3)    yes
C61 . C62 . C63 . 108.86(6)    yes
Fe1 . C62 . C67 . 132.6(3)    yes
C61 . C62 . C67 . 125.30(6)    yes
C63 . C62 . C67 . 125.34(7)    yes
Fe1 . C63 . C62 . 74.7(3)    yes
Fe1 . C63 . C64 . 67.8(4)    yes
C62 . C63 . C64 . 107.86(5)    yes
Fe1 . C63 . C66 . 123.2(4)    yes
C62 . C63 . C66 . 126.14(6)    yes
C64 . C63 . C66 . 126.00(6)    yes
C63 . C64 . C60 . 107.77(5)    yes
C63 . C64 . Fe1 . 71.9(4)    yes
C60 . C64 . Fe1 . 72.9(4)    yes
C63 . C64 . C65 . 127.58(6)    yes
C60 . C64 . C65 . 124.63(6)    yes
Fe1 . C64 . C65 . 122.0(5)    yes
C64 . C65 . H653 . 108.3    no
C64 . C65 . H652 . 107.5    no
H653 . C65 . H652 . 109.8    no
C64 . C65 . H651 . 110.5    no
H653 . C65 . H651 . 111.7    no
H652 . C65 . H651 . 109.0    no
C63 . C66 . H661 . 106.5    no
C63 . C66 . H662 . 109.4    no
H661 . C66 . H662 . 111.1    no
C63 . C66 . H663 . 109.3    no
H661 . C66 . H663 . 109.7    no
H662 . C66 . H663 . 110.6    no
C62 . C67 . H673 . 110.6    no
C62 . C67 . H672 . 108.8    no
H673 . C67 . H672 . 109.7    no
C62 . C67 . H671 . 109.6    no
H673 . C67 . H671 . 109.4    no
H672 . C67 . H671 . 108.7    no
C61 . C68 . H683 . 111.6    no
C61 . C68 . H682 . 109.8    no
H683 . C68 . H682 . 109.5    no
C61 . C68 . H681 . 108.9    no
H683 . C68 . H681 . 110.2    no
H682 . C68 . H681 . 106.7    no
C60 . C69 . H691 . 107.2    no
C60 . C69 . H692 . 108.0    no
H691 . C69 . H692 . 110.0    no
C60 . C69 . H693 . 110.1    no
H691 . C69 . H693 . 110.4    no
H692 . C69 . H693 . 111.0    no
loop_
 _geom_hbond_atom_site_label_D
 _geom_hbond_site_symmetry_D
 _geom_hbond_atom_site_label_H
 _geom_hbond_site_symmetry_H
 _geom_hbond_atom_site_label_A
 _geom_hbond_site_symmetry_A
 _geom_hbond_angle_DHA
 _geom_hbond_distance_DH
 _geom_hbond_distance_HA
 _geom_hbond_distance_DA
 _geom_hbond_publ_flag
C58 . H581 . C29 . 125 0.98 2.60 3.261(5)    yes


# start Validation Reply Form
_vrf_PLAT605_2
;
PROBLEM: VERY LARGE Solvent Accessible VOID(S) in Structure        !
RESPONSE: Unsuccessful attempts have been made to model disordered 
acetone molecules. Thus, the molecules have been removed using 
PLATON Squeeze.

;
# end Validation Reply Form


data_9
_audit_creation_date        "2012-09-28"
_audit_creation_method CRYSTALS_ver_14.52

_oxford_structure_analysis_title  '012mk12 At 11:28 on 28/ 9'
_chemical_name_systematic         .
_chemical_melting_point           .

 
_cell_length_a                    14.9853(2)
_cell_length_b                    8.91110(10)
_cell_length_c                    20.9000(3)
_cell_angle_alpha                 90
_cell_angle_beta                  96.4694(5)
_cell_angle_gamma                 90
_cell_volume                      2773.12(6)
 
_symmetry_cell_setting            'monoclinic' 
_symmetry_space_group_name_H-M    'P 1 21/c 1 ' 
_symmetry_space_group_name_Hall   '-P 2ybc'
loop_
 _symmetry_equiv_pos_as_xyz
 'x,y,z'
 '-x,-y,-z'
 '-x,y+1/2,-z+1/2'
 'x,-y+1/2,z+1/2'

loop_
_atom_type_symbol
_atom_type_scat_dispersion_real
_atom_type_scat_dispersion_imag
_atom_type_scat_Cromer_Mann_a1
_atom_type_scat_Cromer_Mann_b1
_atom_type_scat_Cromer_Mann_a2
_atom_type_scat_Cromer_Mann_b2
_atom_type_scat_Cromer_Mann_a3
_atom_type_scat_Cromer_Mann_b3
_atom_type_scat_Cromer_Mann_a4
_atom_type_scat_Cromer_Mann_b4
_atom_type_scat_Cromer_Mann_c
_atom_type_scat_source  
 C       0.0033   0.0016   2.3100  20.8439   1.0200  10.2075   1.5886   0.5687
   0.8650  51.6512   0.2156 'International Tables Vol C 4.2.6.8 and 6.1.1.4'
 H       0.0000   0.0000   0.4930  10.5109   0.3229  26.1257   0.1402   3.1424
   0.0408  57.7998   0.0030 'International Tables Vol C 4.2.6.8 and 6.1.1.4'
 O       0.0106   0.0060   3.0485  13.2771   2.2868   5.7011   1.5463   0.3239
   0.8670  32.9089   0.2508 'International Tables Vol C 4.2.6.8 and 6.1.1.4'
 Fe      0.3463   0.8444  11.7695   4.7611   7.3573   0.3072   3.5222  15.3535
   2.3045  76.8805   1.0369 'International Tables Vol C 4.2.6.8 and 6.1.1.4'
 B       0.0013   0.0007   2.0545  23.2185   1.3326   1.0210   1.0979  60.3498
   0.7068   0.1403  -0.1932 'International Tables Vol C 4.2.6.8 and 6.1.1.4'
 Si      0.0817   0.0704   6.2915   2.4386   3.0353  32.3337   1.9891   0.6785
   1.5410  81.6937   1.1407 'International Tables Vol C 4.2.6.8 and 6.1.1.4'
 
 
_cell_formula_units_Z                    4

# Given Formula = C30 H30 B1 Fe1 O1 Si1 
# Dc =      1.20 Fooo =   1112.00 Mu =      6.06 M =    501.31
# Found Formula = C31 H39 B1 Fe1 O1 Si1 
# Dc =      1.25 FOOO =   1112.00 Mu =      6.09 M =    522.39

_chemical_formula_sum             'C31 H39 B1 Fe1 O1 Si1'
_chemical_formula_moiety          'C31 H39 B1 Fe1 O1 Si1'
_chemical_compound_source                .
_chemical_formula_weight            522.39
 
 
_cell_measurement_reflns_used         6640
_cell_measurement_theta_min              5
_cell_measurement_theta_max             27
_cell_measurement_temperature          150
 
_exptl_crystal_description        'block' 
_exptl_crystal_colour             'orange' 
_exptl_crystal_size_min           0.150 
_exptl_crystal_size_mid           0.150 
_exptl_crystal_size_max           0.200 
 
_exptl_crystal_density_diffrn     1.251 
_exptl_crystal_density_meas       . 
_exptl_crystal_density_method     'not measured' 
# Non-dispersive F(000): 
_exptl_crystal_F_000              1112 
_exptl_absorpt_coefficient_mu     0.609 
 
# Sheldrick geometric approximatio 0.91 0.91 
_exptl_absorpt_correction_type    multi-scan 
_exptl_absorpt_process_details    'DENZO/SCALEPACK (Otwinowski & Minor, 1997)' 
_exptl_absorpt_correction_T_min   0.80 
_exptl_absorpt_correction_T_max   0.91 
# For a Kappa CCD, set Tmin to 1.0 and 
# Tmax to the ratio of max:min frame scales in scale_all.log 
_diffrn_measurement_device_type   'Nonius KappaCCD' 
_diffrn_measurement_device        'Area' 
_diffrn_radiation_monochromator   'graphite' 
_diffrn_radiation_type            'Mo K\a'
_diffrn_radiation_wavelength           0.71073
_diffrn_measurement_method        \w 
 
# If a reference occurs more than once, delete the author 
# and date from subsequent references. 
_computing_data_collection        'COLLECT (Nonius, 2001).' 
_computing_cell_refinement        'DENZO/SCALEPACK (Otwinowski & Minor, 1997)' 
_computing_data_reduction         'DENZO/SCALEPACK (Otwinowski & Minor, 1997)' 
_computing_structure_solution     'SIR92 (Altomare et al., 1994)' 
_computing_structure_refinement   'CRYSTALS (Betteridge et al., 2003)' 
_computing_publication_material   'CRYSTALS (Betteridge et al., 2003)' 
_computing_molecular_graphics     'CAMERON (Watkin et al., 1996)' 
 
_diffrn_standards_interval_time   . 
_diffrn_standards_interval_count  . 
_diffrn_standards_number          0 
_diffrn_standards_decay_%         . 
 
_diffrn_ambient_temperature        150
_diffrn_reflns_number             92997 
_reflns_number_total              6283 
_diffrn_reflns_av_R_equivalents   0.024 
# Number of reflections without Friedels Law is 11887 
# Number of reflections with Friedels Law is 6283 
# Theoretical number of reflections is about 6333 
 
 
_diffrn_reflns_theta_min          5.105 
_diffrn_reflns_theta_max          27.441 
_diffrn_measured_fraction_theta_max 0.991 
 
_diffrn_reflns_theta_full         26.892 
_diffrn_measured_fraction_theta_full 0.992 
 
 
_diffrn_reflns_limit_h_min        -19 
_diffrn_reflns_limit_h_max        19 
_diffrn_reflns_limit_k_min        -11 
_diffrn_reflns_limit_k_max        11 
_diffrn_reflns_limit_l_min        -27 
_diffrn_reflns_limit_l_max        26 
_reflns_limit_h_min               -19 
_reflns_limit_h_max               19 
_reflns_limit_k_min               0 
_reflns_limit_k_max               11 
_reflns_limit_l_min               0 
_reflns_limit_l_max               27 
 
_oxford_diffrn_Wilson_B_factor    2.38 
_oxford_diffrn_Wilson_scale       6.80 
 
_atom_sites_solution_primary      direct #heavy,direct,difmap,geom
# _atom_sites_solution_secondary  difmap
_atom_sites_solution_hydrogens    difmap
 
_refine_diff_density_min          -0.45 
_refine_diff_density_max          0.47 
 
 
# The current dictionary definitions do not cover the 
# situation where the reflections used for refinement were 
# selected by a user-defined sigma threshold 
 
 
# The values actually used during refinement 
_oxford_reflns_threshold_expression_ref     I>-3.0\s(I)
_refine_ls_number_reflns          6283 
_refine_ls_number_restraints      0 
_refine_ls_number_parameters      316 
_oxford_refine_ls_R_factor_ref    0.0556 
_refine_ls_wR_factor_ref          0.0981 
_refine_ls_goodness_of_fit_ref    0.9131 
_refine_ls_shift/su_max           0.0011051 
_refine_ls_shift/su_mean          0.0000270 
 
 
# The values computed with all filters except I/sigma 
_oxford_reflns_number_all         6283 
_refine_ls_R_factor_all           0.0556 
_refine_ls_wR_factor_all          0.0981 
 
# The values computed with a 2 sigma cutoff - a la SHELX 
_reflns_threshold_expression      I>2.0\s(I)
_reflns_number_gt                 5269 
_refine_ls_R_factor_gt            0.0434 
_refine_ls_wR_factor_gt           0.0902 
 
# choose from: rm (reference molecule of known chirality), 
# ad (anomolous dispersion - Flack), rmad (rm and ad), 
# syn (from synthesis), unk (unknown) or . (not applicable). 
_chemical_absolute_configuration  '.' 
 
 
_refine_ls_structure_factor_coef  Fsqd 
_refine_ls_matrix_type            full
_refine_ls_hydrogen_treatment     constr         #undef, noref, refall,
                                                 # refxyz, refU, constr or mixed
_refine_ls_weighting_scheme       calc 
_refine_ls_weighting_details 
;
 Method, part 1, Chebychev polynomial, (Watkin, 1994, Prince, 1982) 
 [weight] = 1.0/[A~0~*T~0~(x)+A~1~*T~1~(x) ... +A~n-1~]*T~n-1~(x)] 
 where A~i~ are the Chebychev coefficients listed below and x= Fcalc/Fmax 
 Method = Robust Weighting (Prince, 1982) 
 W = [weight] * [1-(deltaF/6*sigmaF)^2^]^2^ 
 A~i~ are: 
 12.5 17.3 8.08 1.96 
;
# Insert your own references if required - in alphabetical order 
_publ_section_references 
; 
Altomare, A., Cascarano, G., Giacovazzo, C., Guagliardi, A., Burla, M.C., 
Polidori, G. & Camalli, M. (1994). J. Appl. Cryst. 27, 435. 
 
Betteridge, P.W., Carruthers, J.R., Cooper, R.I., 
Prout, K. & Watkin, D.J. (2003). J. Appl. Cryst. 36, 1487. 
 
Nonius (2001). COLLECT. Nonius BV, Delft, The Netherlands. 
 
Otwinowski, Z. & Minor, W. (1997). Methods in Enzymology, Vol. 276, 
edited by C. W. Carter Jr & R. M. Sweet, pp. 307--326. 
New York: Academic Press. 
 
Prince, E. 
Mathematical Techniques in Crystallography 
and Materials Science 
Springer-Verlag, New York, 1982. 
 
Watkin D.J. (1994). 
Acta Cryst, A50, 411-437. 
 
Watkin, D.J., Prout, C.K. & Pearce, L.J. (1996). CAMERON, Chemical 
Crystallography Laboratory, Oxford, UK. 
; 

# Uequiv = arithmetic mean of Ui i.e. Ueqiv = (U1+U2+U3)/3

# Replace last . with number of unfound hydrogen atoms attached to an atom.

# ..._refinement_flags_... 
# . no refinement constraints           S special position constraint on site
# G rigid group refinement of site      R riding atom
# D distance or angle restraint on site T thermal displacement constraints
# U Uiso or Uij restraint (rigid bond)  P partial occupancy constraint


loop_
_atom_site_label
_atom_site_type_symbol
_atom_site_fract_x
_atom_site_fract_y
_atom_site_fract_z
_atom_site_U_iso_or_equiv
_atom_site_occupancy
_atom_site_adp_type
_atom_site_refinement_flags_posn
_atom_site_refinement_flags_adp
_atom_site_refinement_flags_occupancy
_atom_site_disorder_assembly
_atom_site_disorder_group
_atom_site_attached_hydrogens
Fe1 Fe 0.58224(2) 0.58700(4) 0.384105(14) 0.0301 1.0000 Uani . . . . . . 
C2 C 0.66136(13) 0.4148(2) 0.42570(9) 0.0281 1.0000 Uani . . . . . . 
C3 C 0.71596(13) 0.5169(2) 0.39276(9) 0.0276 1.0000 Uani . . . . . . 
C4 C 0.70472(15) 0.6646(3) 0.41986(11) 0.0332 1.0000 Uani . . . . . . 
C5 C 0.64910(15) 0.6526(3) 0.47060(11) 0.0356 1.0000 Uani . . . . . . 
C6 C 0.62140(14) 0.5013(3) 0.47336(10) 0.0321 1.0000 Uani . . . . . . 
B7 B 0.79293(15) 0.4903(3) 0.34878(10) 0.0263 1.0000 Uani . . . . . . 
C8 C 0.79866(13) 0.6046(2) 0.29125(9) 0.0264 1.0000 Uani . . . . . . 
C9 C 0.74453(13) 0.5937(2) 0.23166(10) 0.0297 1.0000 Uani . . . . . . 
C10 C 0.68438(15) 0.4607(3) 0.21496(11) 0.0365 1.0000 Uani . . . . . . 
C11 C 0.74907(15) 0.7048(3) 0.18510(10) 0.0338 1.0000 Uani . . . . . . 
C12 C 0.80534(15) 0.8270(3) 0.19461(10) 0.0353 1.0000 Uani . . . . . . 
C13 C 0.85948(15) 0.8376(3) 0.25331(10) 0.0331 1.0000 Uani . . . . . . 
C14 C 0.85724(14) 0.7287(2) 0.30083(10) 0.0299 1.0000 Uani . . . . . . 
C15 C 0.91858(16) 0.7475(3) 0.36295(11) 0.0386 1.0000 Uani . . . . . . 
C16 C 0.8105(2) 0.9451(3) 0.14324(12) 0.0495 1.0000 Uani . . . . . . 
C17 C 0.87079(13) 0.3741(2) 0.37029(9) 0.0265 1.0000 Uani . . . . . . 
C18 C 0.91501(13) 0.2915(2) 0.32486(10) 0.0292 1.0000 Uani . . . . . . 
C19 C 0.88918(16) 0.3024(3) 0.25299(10) 0.0387 1.0000 Uani . . . . . . 
C20 C 0.98410(14) 0.1918(3) 0.34495(11) 0.0335 1.0000 Uani . . . . . . 
C21 C 1.01537(14) 0.1721(3) 0.40945(11) 0.0353 1.0000 Uani . . . . . . 
C22 C 0.97428(15) 0.2550(3) 0.45380(11) 0.0355 1.0000 Uani . . . . . . 
C23 C 0.90396(14) 0.3538(3) 0.43634(10) 0.0305 1.0000 Uani . . . . . . 
C24 C 0.86991(16) 0.4395(3) 0.49135(10) 0.0392 1.0000 Uani . . . . . . 
C25 C 1.09269(17) 0.0690(3) 0.43050(14) 0.0499 1.0000 Uani . . . . . . 
Si26 Si 0.64433(4) 0.21244(7) 0.41045(3) 0.0312 1.0000 Uani . . . . . . 
O27 O 0.66096(15) 0.1857(2) 0.33505(9) 0.0590 1.0000 Uani . . . . . . 
C28 C 0.7026(2) 0.0639(3) 0.30949(15) 0.0536 1.0000 Uani . . . . . . 
C29 C 0.52531(17) 0.1581(3) 0.42294(14) 0.0487 1.0000 Uani . . . . . . 
C30 C 0.7219(2) 0.0985(3) 0.46634(14) 0.0530 1.0000 Uani . . . . . . 
C31 C 0.53927(17) 0.6542(3) 0.29197(11) 0.0439 1.0000 Uani . . . . . . 
C32 C 0.51254(17) 0.7599(3) 0.33640(12) 0.0458 1.0000 Uani . . . . . . 
C33 C 0.45725(17) 0.6846(3) 0.37706(13) 0.0473 1.0000 Uani . . . . . . 
C34 C 0.45019(16) 0.5330(3) 0.35838(13) 0.0471 1.0000 Uani . . . . . . 
C35 C 0.50142(17) 0.5138(3) 0.30514(12) 0.0474 1.0000 Uani . . . . . . 
H41 H 0.7309 0.7584 0.4056 0.0406 1.0000 Uiso R . . . . . 
H51 H 0.6298 0.7343 0.4966 0.0439 1.0000 Uiso R . . . . . 
H61 H 0.5787 0.4628 0.5014 0.0398 1.0000 Uiso R . . . . . 
H101 H 0.6279 0.4928 0.1923 0.0545 1.0000 Uiso R . . . . . 
H102 H 0.7115 0.3947 0.1863 0.0543 1.0000 Uiso R . . . . . 
H103 H 0.6732 0.4041 0.2519 0.0552 1.0000 Uiso R . . . . . 
H111 H 0.7119 0.6959 0.1460 0.0408 1.0000 Uiso R . . . . . 
H131 H 0.8976 0.9209 0.2604 0.0407 1.0000 Uiso R . . . . . 
H151 H 0.9506 0.8386 0.3633 0.0593 1.0000 Uiso R . . . . . 
H152 H 0.9614 0.6686 0.3672 0.0597 1.0000 Uiso R . . . . . 
H153 H 0.8871 0.7446 0.3986 0.0592 1.0000 Uiso R . . . . . 
H163 H 0.8712 0.9675 0.1382 0.0754 1.0000 Uiso R . . . . . 
H162 H 0.7818 0.9117 0.1027 0.0756 1.0000 Uiso R . . . . . 
H161 H 0.7828 1.0345 0.1557 0.0754 1.0000 Uiso R . . . . . 
H191 H 0.9283 0.2404 0.2313 0.0575 1.0000 Uiso R . . . . . 
H192 H 0.8954 0.4033 0.2385 0.0576 1.0000 Uiso R . . . . . 
H193 H 0.8297 0.2684 0.2416 0.0585 1.0000 Uiso R . . . . . 
H201 H 1.0119 0.1369 0.3143 0.0395 1.0000 Uiso R . . . . . 
H221 H 0.9944 0.2456 0.4971 0.0429 1.0000 Uiso R . . . . . 
H241 H 0.9120 0.4332 0.5290 0.0586 1.0000 Uiso R . . . . . 
H242 H 0.8608 0.5434 0.4814 0.0588 1.0000 Uiso R . . . . . 
H243 H 0.8143 0.3993 0.5017 0.0591 1.0000 Uiso R . . . . . 
H251 H 1.0799 0.0026 0.4629 0.0755 1.0000 Uiso R . . . . . 
H252 H 1.1436 0.1233 0.4468 0.0760 1.0000 Uiso R . . . . . 
H253 H 1.1095 0.0106 0.3961 0.0757 1.0000 Uiso R . . . . . 
H283 H 0.6973 0.0751 0.2619 0.0819 1.0000 Uiso R . . . . . 
H282 H 0.7658 0.0639 0.3276 0.0812 1.0000 Uiso R . . . . . 
H281 H 0.6741 -0.0289 0.3211 0.0817 1.0000 Uiso R . . . . . 
H303 H 0.7061 -0.0054 0.4626 0.0802 1.0000 Uiso R . . . . . 
H301 H 0.7832 0.1133 0.4567 0.0804 1.0000 Uiso R . . . . . 
H302 H 0.7162 0.1316 0.5096 0.0794 1.0000 Uiso R . . . . . 
H311 H 0.5800 0.6733 0.2597 0.0529 1.0000 Uiso R . . . . . 
H321 H 0.5317 0.8663 0.3397 0.0556 1.0000 Uiso R . . . . . 
H331 H 0.4300 0.7295 0.4132 0.0572 1.0000 Uiso R . . . . . 
H341 H 0.4175 0.4548 0.3782 0.0565 1.0000 Uiso R . . . . . 
H351 H 0.5116 0.4214 0.2833 0.0567 1.0000 Uiso R . . . . . 
H293 H 0.4875 0.1939 0.3884 0.0739 1.0000 Uiso R . . . . . 
H291 H 0.5120 0.2008 0.4614 0.0742 1.0000 Uiso R . . . . . 
H292 H 0.5228 0.0535 0.4255 0.0731 1.0000 Uiso R . . . . . 
loop_
_atom_site_aniso_label
_atom_site_aniso_U_11
_atom_site_aniso_U_22
_atom_site_aniso_U_33
_atom_site_aniso_U_23
_atom_site_aniso_U_13
_atom_site_aniso_U_12
Fe1 0.02877(15) 0.03203(16) 0.02984(15) 0.00451(13) 0.00463(11) 0.00557(12) 
C2 0.0270(9) 0.0309(10) 0.0265(9) 0.0036(8) 0.0037(7) 0.0043(8) 
C3 0.0273(9) 0.0283(10) 0.0271(9) 0.0031(8) 0.0024(7) 0.0015(8) 
C4 0.0340(11) 0.0289(10) 0.0366(11) -0.0005(9) 0.0040(9) 0.0006(9) 
C5 0.0374(11) 0.0371(12) 0.0326(11) -0.0037(9) 0.0054(9) 0.0052(9) 
C6 0.0337(11) 0.0377(11) 0.0254(9) 0.0052(8) 0.0061(8) 0.0056(9) 
B7 0.0265(10) 0.0284(11) 0.0234(10) -0.0015(9) 0.0004(8) -0.0039(9) 
C8 0.0251(9) 0.0302(10) 0.0241(9) 0.0016(8) 0.0042(7) 0.0007(8) 
C9 0.0274(9) 0.0342(11) 0.0275(9) 0.0001(8) 0.0032(7) 0.0014(8) 
C10 0.0345(11) 0.0413(12) 0.0323(11) -0.0009(9) -0.0024(9) -0.0039(10) 
C11 0.0337(11) 0.0435(13) 0.0240(9) 0.0036(9) 0.0017(8) 0.0035(9) 
C12 0.0376(11) 0.0384(12) 0.0310(10) 0.0087(9) 0.0090(9) 0.0032(9) 
C13 0.0354(11) 0.0313(11) 0.0337(11) 0.0022(9) 0.0086(9) -0.0029(9) 
C14 0.0297(10) 0.0323(10) 0.0281(10) -0.0012(8) 0.0049(8) -0.0005(8) 
C15 0.0391(12) 0.0438(13) 0.0318(11) 0.0032(9) -0.0007(9) -0.0119(10) 
C16 0.0613(16) 0.0498(15) 0.0381(13) 0.0165(11) 0.0077(12) -0.0006(13) 
C17 0.0244(9) 0.0276(10) 0.0273(9) 0.0021(8) 0.0024(7) -0.0030(8) 
C18 0.0286(10) 0.0299(10) 0.0294(10) 0.0011(8) 0.0050(8) -0.0039(8) 
C19 0.0442(13) 0.0437(13) 0.0293(10) -0.0035(9) 0.0085(9) 0.0059(10) 
C20 0.0317(10) 0.0306(11) 0.0396(11) 0.0001(9) 0.0103(9) 0.0009(9) 
C21 0.0280(10) 0.0336(11) 0.0439(12) 0.0089(9) 0.0021(9) 0.0002(9) 
C22 0.0321(11) 0.0418(12) 0.0312(10) 0.0081(9) -0.0033(8) -0.0029(9) 
C23 0.0283(10) 0.0345(11) 0.0284(10) 0.0003(8) 0.0020(8) -0.0032(8) 
C24 0.0379(12) 0.0518(14) 0.0265(10) -0.0028(10) -0.0020(9) 0.0018(10) 
C25 0.0377(13) 0.0505(15) 0.0608(16) 0.0146(13) 0.0028(11) 0.0119(11) 
Si26 0.0347(3) 0.0272(3) 0.0322(3) 0.0019(2) 0.0049(2) 0.0014(2) 
O27 0.0791(14) 0.0578(12) 0.0411(10) -0.0031(9) 0.0113(9) 0.0222(11) 
C28 0.0581(16) 0.0445(15) 0.0612(17) -0.0094(13) 0.0200(13) -0.0022(13) 
C29 0.0430(13) 0.0373(13) 0.0676(17) -0.0056(12) 0.0142(12) -0.0080(11) 
C30 0.0627(17) 0.0330(13) 0.0598(16) 0.0108(12) -0.0081(13) 0.0046(12) 
C31 0.0420(13) 0.0563(16) 0.0332(11) 0.0115(11) 0.0033(10) 0.0154(12) 
C32 0.0455(14) 0.0477(14) 0.0447(13) 0.0146(11) 0.0080(11) 0.0203(11) 
C33 0.0377(12) 0.0607(17) 0.0441(13) 0.0108(12) 0.0072(10) 0.0211(12) 
C34 0.0290(11) 0.0631(17) 0.0479(14) 0.0096(13) -0.0015(10) 0.0015(11) 
C35 0.0408(13) 0.0569(16) 0.0417(13) -0.0033(12) -0.0070(10) 0.0082(12) 

_refine_ls_extinction_method 
    'None'
_oxford_refine_ls_scale 0.3893(4) 
loop_
 _geom_bond_atom_site_label_1
 _geom_bond_site_symmetry_1
 _geom_bond_atom_site_label_2
 _geom_bond_site_symmetry_2
 _geom_bond_distance
 _geom_bond_publ_flag
Fe1 . C2 . 2.070(2)    yes
Fe1 . C3 . 2.087(2)    yes
Fe1 . C4 . 2.024(2)    yes
Fe1 . C5 . 2.051(2)    yes
Fe1 . C6 . 2.040(2)    yes
Fe1 . C31 . 2.050(2)    yes
Fe1 . C32 . 2.055(2)    yes
Fe1 . C33 . 2.055(2)    yes
Fe1 . C34 . 2.048(2)    yes
Fe1 . C35 . 2.041(2)    yes
C2 . C3 . 1.449(3)    yes
C2 . C6 . 1.442(3)    yes
C2 . Si26 . 1.844(2)    yes
C3 . C4 . 1.450(3)    yes
C3 . B7 . 1.572(3)    yes
C4 . C5 . 1.425(3)    yes
C4 . H41 . 0.983    no
C5 . C6 . 1.414(3)    yes
C5 . H51 . 0.972    no
C6 . H61 . 0.977    no
B7 . C8 . 1.585(3)    yes
B7 . C17 . 1.586(3)    yes
C8 . C9 . 1.411(3)    yes
C8 . C14 . 1.412(3)    yes
C9 . C10 . 1.506(3)    yes
C9 . C11 . 1.395(3)    yes
C10 . H101 . 0.965    no
C10 . H102 . 0.961    no
C10 . H103 . 0.954    no
C11 . C12 . 1.378(3)    yes
C11 . H111 . 0.939    no
C12 . C13 . 1.396(3)    yes
C12 . C16 . 1.511(3)    yes
C13 . C14 . 1.392(3)    yes
C13 . H131 . 0.938    no
C14 . C15 . 1.513(3)    yes
C15 . H151 . 0.942    no
C15 . H152 . 0.950    no
C15 . H153 . 0.926    no
C16 . H163 . 0.949    no
C16 . H162 . 0.953    no
C16 . H161 . 0.948    no
C17 . C18 . 1.423(3)    yes
C17 . C23 . 1.425(3)    yes
C18 . C19 . 1.511(3)    yes
C18 . C20 . 1.393(3)    yes
C19 . H191 . 0.955    no
C19 . H192 . 0.957    no
C19 . H193 . 0.947    no
C20 . C21 . 1.388(3)    yes
C20 . H201 . 0.939    no
C21 . C22 . 1.383(3)    yes
C21 . C25 . 1.505(3)    yes
C22 . C23 . 1.390(3)    yes
C22 . H221 . 0.925    no
C23 . C24 . 1.516(3)    yes
C24 . H241 . 0.953    no
C24 . H242 . 0.955    no
C24 . H243 . 0.954    no
C25 . H251 . 0.935    no
C25 . H252 . 0.935    no
C25 . H253 . 0.945    no
Si26 . O27 . 1.6404(19)    yes
Si26 . C29 . 1.894(3)    yes
Si26 . C30 . 1.855(3)    yes
O27 . C28 . 1.388(3)    yes
C28 . H283 . 0.993    no
C28 . H282 . 0.980    no
C28 . H281 . 0.974    no
C29 . H293 . 0.923    no
C29 . H291 . 0.931    no
C29 . H292 . 0.935    no
C30 . H303 . 0.958    no
C30 . H301 . 0.971    no
C30 . H302 . 0.964    no
C31 . C32 . 1.412(4)    yes
C31 . C35 . 1.414(4)    yes
C31 . H311 . 0.974    no
C32 . C33 . 1.420(4)    yes
C32 . H321 . 0.991    no
C33 . C34 . 1.407(4)    yes
C33 . H331 . 0.982    no
C34 . C35 . 1.432(4)    yes
C34 . H341 . 0.971    no
C35 . H351 . 0.961    no
loop_
 _geom_angle_atom_site_label_1
 _geom_angle_site_symmetry_1
 _geom_angle_atom_site_label_2
 _geom_angle_site_symmetry_2
 _geom_angle_atom_site_label_3
 _geom_angle_site_symmetry_3
 _geom_angle
 _geom_angle_publ_flag
C2 . Fe1 . C3 . 40.79(8)    yes
C2 . Fe1 . C4 . 69.23(9)    yes
C3 . Fe1 . C4 . 41.26(8)    yes
C2 . Fe1 . C5 . 68.97(9)    yes
C3 . Fe1 . C5 . 68.90(8)    yes
C4 . Fe1 . C5 . 40.93(9)    yes
C2 . Fe1 . C6 . 41.08(8)    yes
C3 . Fe1 . C6 . 68.55(8)    yes
C4 . Fe1 . C6 . 68.57(9)    yes
C5 . Fe1 . C6 . 40.43(9)    yes
C2 . Fe1 . C31 . 135.70(9)    yes
C3 . Fe1 . C31 . 111.45(9)    yes
C4 . Fe1 . C31 . 115.01(10)    yes
C5 . Fe1 . C31 . 144.61(11)    yes
C6 . Fe1 . C31 . 174.92(11)    yes
C2 . Fe1 . C32 . 174.43(9)    yes
C3 . Fe1 . C32 . 134.16(9)    yes
C4 . Fe1 . C32 . 108.25(11)    yes
C5 . Fe1 . C32 . 112.65(11)    yes
C6 . Fe1 . C32 . 143.35(10)    yes
C2 . Fe1 . C33 . 144.90(10)    yes
C3 . Fe1 . C33 . 172.34(10)    yes
C4 . Fe1 . C33 . 131.53(11)    yes
C5 . Fe1 . C33 . 107.05(10)    yes
C6 . Fe1 . C33 . 112.94(9)    yes
C2 . Fe1 . C34 . 115.28(10)    yes
C3 . Fe1 . C34 . 147.37(10)    yes
C4 . Fe1 . C34 . 170.44(10)    yes
C5 . Fe1 . C34 . 131.29(10)    yes
C6 . Fe1 . C34 . 108.79(10)    yes
C2 . Fe1 . C35 . 111.24(10)    yes
C3 . Fe1 . C35 . 116.79(10)    yes
C4 . Fe1 . C35 . 146.98(10)    yes
C5 . Fe1 . C35 . 172.06(10)    yes
C6 . Fe1 . C35 . 134.69(11)    yes
C31 . Fe1 . C32 . 40.22(10)    yes
C31 . Fe1 . C33 . 67.77(10)    yes
C32 . Fe1 . C33 . 40.43(10)    yes
C31 . Fe1 . C34 . 68.29(11)    yes
C32 . Fe1 . C34 . 68.01(12)    yes
C33 . Fe1 . C34 . 40.09(12)    yes
C31 . Fe1 . C35 . 40.44(11)    yes
C32 . Fe1 . C35 . 67.95(12)    yes
C33 . Fe1 . C35 . 67.95(11)    yes
C34 . Fe1 . C35 . 40.99(11)    yes
Fe1 . C2 . C3 . 70.25(11)    yes
Fe1 . C2 . C6 . 68.34(11)    yes
C3 . C2 . C6 . 107.04(18)    yes
Fe1 . C2 . Si26 . 126.21(11)    yes
C3 . C2 . Si26 . 127.36(15)    yes
C6 . C2 . Si26 . 125.60(16)    yes
C2 . C3 . Fe1 . 68.96(11)    yes
C2 . C3 . C4 . 106.72(17)    yes
Fe1 . C3 . C4 . 67.03(12)    yes
C2 . C3 . B7 . 132.38(19)    yes
Fe1 . C3 . B7 . 139.04(14)    yes
C4 . C3 . B7 . 119.39(18)    yes
C3 . C4 . Fe1 . 71.71(12)    yes
C3 . C4 . C5 . 109.04(19)    yes
Fe1 . C4 . C5 . 70.55(13)    yes
C3 . C4 . H41 . 125.8    no
Fe1 . C4 . H41 . 123.7    no
C5 . C4 . H41 . 125.2    no
C4 . C5 . Fe1 . 68.52(12)    yes
C4 . C5 . C6 . 107.51(19)    yes
Fe1 . C5 . C6 . 69.36(13)    yes
C4 . C5 . H51 . 126.6    no
Fe1 . C5 . H51 . 124.1    no
C6 . C5 . H51 . 125.7    no
C2 . C6 . C5 . 109.58(19)    yes
C2 . C6 . Fe1 . 70.58(11)    yes
C5 . C6 . Fe1 . 70.21(13)    yes
C2 . C6 . H61 . 125.2    no
C5 . C6 . H61 . 125.1    no
Fe1 . C6 . H61 . 122.7    no
C3 . B7 . C8 . 116.91(18)    yes
C3 . B7 . C17 . 119.84(17)    yes
C8 . B7 . C17 . 122.22(17)    yes
B7 . C8 . C9 . 123.40(18)    yes
B7 . C8 . C14 . 118.79(17)    yes
C9 . C8 . C14 . 117.72(18)    yes
C8 . C9 . C10 . 121.87(19)    yes
C8 . C9 . C11 . 119.9(2)    yes
C10 . C9 . C11 . 118.14(18)    yes
C9 . C10 . H101 . 110.4    no
C9 . C10 . H102 . 110.0    no
H101 . C10 . H102 . 106.5    no
C9 . C10 . H103 . 112.6    no
H101 . C10 . H103 . 109.2    no
H102 . C10 . H103 . 107.8    no
C9 . C11 . C12 . 122.50(19)    yes
C9 . C11 . H111 . 118.5    no
C12 . C11 . H111 . 119.0    no
C11 . C12 . C13 . 117.8(2)    yes
C11 . C12 . C16 . 121.8(2)    yes
C13 . C12 . C16 . 120.4(2)    yes
C12 . C13 . C14 . 121.4(2)    yes
C12 . C13 . H131 . 118.4    no
C14 . C13 . H131 . 120.1    no
C8 . C14 . C13 . 120.63(19)    yes
C8 . C14 . C15 . 121.08(19)    yes
C13 . C14 . C15 . 118.29(19)    yes
C14 . C15 . H151 . 111.2    no
C14 . C15 . H152 . 109.7    no
H151 . C15 . H152 . 107.4    no
C14 . C15 . H153 . 111.8    no
H151 . C15 . H153 . 108.9    no
H152 . C15 . H153 . 107.7    no
C12 . C16 . H163 . 110.5    no
C12 . C16 . H162 . 111.1    no
H163 . C16 . H162 . 108.0    no
C12 . C16 . H161 . 109.4    no
H163 . C16 . H161 . 107.9    no
H162 . C16 . H161 . 109.8    no
B7 . C17 . C18 . 122.10(17)    yes
B7 . C17 . C23 . 121.51(18)    yes
C18 . C17 . C23 . 116.28(18)    yes
C17 . C18 . C19 . 122.93(19)    yes
C17 . C18 . C20 . 121.01(19)    yes
C19 . C18 . C20 . 116.03(19)    yes
C18 . C19 . H191 . 109.4    no
C18 . C19 . H192 . 110.6    no
H191 . C19 . H192 . 107.8    no
C18 . C19 . H193 . 111.0    no
H191 . C19 . H193 . 107.8    no
H192 . C19 . H193 . 110.1    no
C18 . C20 . C21 . 122.1(2)    yes
C18 . C20 . H201 . 119.9    no
C21 . C20 . H201 . 118.0    no
C20 . C21 . C22 . 117.2(2)    yes
C20 . C21 . C25 . 121.7(2)    yes
C22 . C21 . C25 . 121.1(2)    yes
C21 . C22 . C23 . 122.9(2)    yes
C21 . C22 . H221 . 119.2    no
C23 . C22 . H221 . 117.9    no
C17 . C23 . C22 . 120.4(2)    yes
C17 . C23 . C24 . 124.08(19)    yes
C22 . C23 . C24 . 115.46(19)    yes
C23 . C24 . H241 . 110.4    no
C23 . C24 . H242 . 112.0    no
H241 . C24 . H242 . 107.6    no
C23 . C24 . H243 . 111.1    no
H241 . C24 . H243 . 107.8    no
H242 . C24 . H243 . 107.8    no
C21 . C25 . H251 . 112.6    no
C21 . C25 . H252 . 111.1    no
H251 . C25 . H252 . 106.8    no
C21 . C25 . H253 . 112.1    no
H251 . C25 . H253 . 107.2    no
H252 . C25 . H253 . 106.7    no
C2 . Si26 . O27 . 105.96(10)    yes
C2 . Si26 . C29 . 109.89(11)    yes
O27 . Si26 . C29 . 110.04(13)    yes
C2 . Si26 . C30 . 111.19(11)    yes
O27 . Si26 . C30 . 111.91(13)    yes
C29 . Si26 . C30 . 107.86(14)    yes
Si26 . O27 . C28 . 127.34(19)    yes
O27 . C28 . H283 . 108.6    no
O27 . C28 . H282 . 108.0    no
H283 . C28 . H282 . 110.5    no
O27 . C28 . H281 . 109.9    no
H283 . C28 . H281 . 110.3    no
H282 . C28 . H281 . 109.6    no
Si26 . C29 . H293 . 107.9    no
Si26 . C29 . H291 . 108.1    no
H293 . C29 . H291 . 111.2    no
Si26 . C29 . H292 . 107.9    no
H293 . C29 . H292 . 111.4    no
H291 . C29 . H292 . 110.1    no
Si26 . C30 . H303 . 110.2    no
Si26 . C30 . H301 . 109.6    no
H303 . C30 . H301 . 110.3    no
Si26 . C30 . H302 . 107.9    no
H303 . C30 . H302 . 108.9    no
H301 . C30 . H302 . 109.8    no
Fe1 . C31 . C32 . 70.09(13)    yes
Fe1 . C31 . C35 . 69.44(14)    yes
C32 . C31 . C35 . 108.2(2)    yes
Fe1 . C31 . H311 . 123.1    no
C32 . C31 . H311 . 125.8    no
C35 . C31 . H311 . 125.8    no
C31 . C32 . Fe1 . 69.68(14)    yes
C31 . C32 . C33 . 107.9(3)    yes
Fe1 . C32 . C33 . 69.79(14)    yes
C31 . C32 . H321 . 125.6    no
Fe1 . C32 . H321 . 123.8    no
C33 . C32 . H321 . 126.5    no
C32 . C33 . Fe1 . 69.78(13)    yes
C32 . C33 . C34 . 108.5(2)    yes
Fe1 . C33 . C34 . 69.69(14)    yes
C32 . C33 . H331 . 126.0    no
Fe1 . C33 . H331 . 124.8    no
C34 . C33 . H331 . 125.4    no
C33 . C34 . Fe1 . 70.22(15)    yes
C33 . C34 . C35 . 107.5(2)    yes
Fe1 . C34 . C35 . 69.23(14)    yes
C33 . C34 . H341 . 126.6    no
Fe1 . C34 . H341 . 125.1    no
C35 . C34 . H341 . 125.8    no
C34 . C35 . C31 . 107.9(2)    yes
C34 . C35 . Fe1 . 69.78(14)    yes
C31 . C35 . Fe1 . 70.12(15)    yes
C34 . C35 . H351 . 126.8    no
C31 . C35 . H351 . 125.2    no
Fe1 . C35 . H351 . 123.1    no


_iucr_refine_instructions_details_constraints
;
#
# Punched on 28/09/12 at 11:35:49
#
#LIST     12                                                                    
BLOCK SCALE X'S, U'S 
RIDE C   (   4,X'S) H   (  41,X'S) 
RIDE C   (   5,X'S) H   (  51,X'S) 
RIDE C   (   6,X'S) H   (  61,X'S) 
RIDE C   (  10,X'S) H   ( 101,X'S) H   ( 102,X'S) H   ( 103,X'S) 
RIDE C   (  11,X'S) H   ( 111,X'S) 
RIDE C   (  13,X'S) H   ( 131,X'S) 
RIDE C   (  15,X'S) H   ( 151,X'S) H   ( 152,X'S) H   ( 153,X'S) 
RIDE C   (  16,X'S) H   ( 163,X'S) H   ( 162,X'S) H   ( 161,X'S) 
RIDE C   (  19,X'S) H   ( 191,X'S) H   ( 192,X'S) H   ( 193,X'S) 
RIDE C   (  20,X'S) H   ( 201,X'S) 
RIDE C   (  22,X'S) H   ( 221,X'S) 
RIDE C   (  24,X'S) H   ( 241,X'S) H   ( 242,X'S) H   ( 243,X'S) 
RIDE C   (  25,X'S) H   ( 251,X'S) H   ( 252,X'S) H   ( 253,X'S) 
RIDE C   (  28,X'S) H   ( 283,X'S) H   ( 282,X'S) H   ( 281,X'S) 
RIDE C   (  29,X'S) H   ( 293,X'S) H   ( 291,X'S) H   ( 292,X'S) 
RIDE C   (  30,X'S) H   ( 303,X'S) H   ( 301,X'S) H   ( 302,X'S) 
RIDE C   (  31,X'S) H   ( 311,X'S) 
RIDE C   (  32,X'S) H   ( 321,X'S) 
RIDE C   (  33,X'S) H   ( 331,X'S) 
RIDE C   (  34,X'S) H   ( 341,X'S) 
RIDE C   (  35,X'S) H   ( 351,X'S) 
END                                                                             
;


_iucr_refine_instructions_details_restraints
;
#
# Punched on 28/09/12 at 11:35:49
#
#LIST     16                                                                    
NO 
REM   HREST   START (DO NOT REMOVE THIS LINE) 
REM   HREST   END (DO NOT REMOVE THIS LINE) 
END                                                                             
;


data_1a.CN
 
_chemical_name_systematic 
; 
 . 
; 
_chemical_name_common             . 
_chemical_melting_point           'not measured' 
_chemical_formula_moiety          
 'C59 H76 B2 Fe K N O6, C H Cl3, 0.25(C H Cl3), 0.25(C4 H10 O)' 
_chemical_formula_sum 
 'C61.25 H79.75 B2 Cl3.75 Fe K N O6.25' 
_chemical_formula_weight          1179.52 
 
loop_ 
 _atom_type_symbol 
 _atom_type_description 
 _atom_type_scat_dispersion_real 
 _atom_type_scat_dispersion_imag 
 _atom_type_scat_source 
 'C'  'C'   0.0033   0.0016 
 'International Tables Vol C Tables 4.2.6.8 and 6.1.1.4' 
 'H'  'H'   0.0000   0.0000 
 'International Tables Vol C Tables 4.2.6.8 and 6.1.1.4' 
 'B'  'B'   0.0013   0.0007 
 'International Tables Vol C Tables 4.2.6.8 and 6.1.1.4' 
 'N'  'N'   0.0061   0.0033 
 'International Tables Vol C Tables 4.2.6.8 and 6.1.1.4' 
 'O'  'O'   0.0106   0.0060 
 'International Tables Vol C Tables 4.2.6.8 and 6.1.1.4' 
 'K'  'K'   0.2009   0.2494 
 'International Tables Vol C Tables 4.2.6.8 and 6.1.1.4' 
 'Fe'  'Fe'   0.3463   0.8444 
 'International Tables Vol C Tables 4.2.6.8 and 6.1.1.4' 
 'Cl'  'Cl'   0.1484   0.1585 
 'International Tables Vol C Tables 4.2.6.8 and 6.1.1.4' 
 
_symmetry_cell_setting            Monoclinic 
_symmetry_space_group_name_H-M    P2(1)/c
_symmetry_space_group_name_Hall   '-P 2ybc'
 
loop_ 
 _symmetry_equiv_pos_as_xyz 
 'x, y, z' 
 '-x, y+1/2, -z+1/2' 
 '-x, -y, -z' 
 'x, -y-1/2, z-1/2' 
 
_cell_length_a                    21.6605(2) 
_cell_length_b                    13.79520(10) 
_cell_length_c                    22.32550(10) 
_cell_angle_alpha                 90.00 
_cell_angle_beta                  109.2120(10) 
_cell_angle_gamma                 90.00 
_cell_volume                      6299.57(8) 
_cell_formula_units_Z             4 
_cell_measurement_temperature     150(2) 
_cell_measurement_reflns_used     111256
_cell_measurement_theta_min       5.097
_cell_measurement_theta_max       27.485
 
_exptl_crystal_description        block 
_exptl_crystal_colour             clear_intense_red
_exptl_crystal_size_max           0.30 
_exptl_crystal_size_mid           0.25 
_exptl_crystal_size_min           0.17 
_exptl_crystal_density_meas       'not measured' 
_exptl_crystal_density_diffrn     1.244 
_exptl_crystal_density_method     'not measured' 
_exptl_crystal_F_000              2492 
_exptl_absorpt_coefficient_mu     0.513 
_exptl_absorpt_correction_type    multi-scan
_exptl_absorpt_correction_T_min   0.840 
_exptl_absorpt_correction_T_max   0.920 
_exptl_absorpt_process_details    
;
Multi-scan from symmetry-related measurements using 
Sortav (Blessing 1995). 
;

_exptl_special_details 
; 
The data collection nominally covered a hemisphere 
of reciprocal Space, by a combination of \w scans.
; 
 
_diffrn_ambient_temperature       150(2) 
_diffrn_radiation_wavelength      0.71073 
_diffrn_radiation_type            MoK\a 
_diffrn_radiation_source          'fine-focus sealed tube' 
_diffrn_radiation_monochromator   graphite 
_diffrn_measurement_device_type   'KappaCCD'
_diffrn_measurement_method        'CCD' 
_diffrn_detector_area_resol_mean  9 
_diffrn_standards_number          . 
_diffrn_standards_interval_count  . 
_diffrn_standards_interval_time   . 
_diffrn_standards_decay_%         . 
_diffrn_reflns_number             93176 
_diffrn_reflns_av_R_equivalents   0.0831 
_diffrn_reflns_av_sigmaI/netI     0.0558 
_diffrn_reflns_limit_h_min        -28 
_diffrn_reflns_limit_h_max        27 
_diffrn_reflns_limit_k_min        -16 
_diffrn_reflns_limit_k_max        17 
_diffrn_reflns_limit_l_min        -28 
_diffrn_reflns_limit_l_max        28 
_diffrn_reflns_theta_min          5.12 
_diffrn_reflns_theta_max          27.48 
_reflns_number_total              14307 
_reflns_number_gt                 9412 
_reflns_threshold_expression      >2sigma(I) 
 
_computing_data_collection        'Collect (Nonius BV, 1997-2000)'
_computing_cell_refinement        'HKL Scalepack (Otwinowski & Minor 1997)'
_computing_data_reduction         
 'HKL Denzo and Scalepack (Otwinowski & Minor 1997)'
_computing_structure_solution     'SHELXS-97 (Sheldrick, 1997)' 
_computing_structure_refinement   'SHELXL-97 (Sheldrick, 1997)' 
_computing_molecular_graphics     'Bruker SHELXTL' 
_computing_publication_material   'Bruker SHELXTL' 
 
_refine_special_details 
; 
 Refinement of F^2^ against ALL reflections.  The weighted R-factor wR and 
 goodness of fit S are based on F^2^, conventional R-factors R are based 
 on F, with F set to zero for negative F^2^. The threshold expression of 
 F^2^ > 2sigma(F^2^) is used only for calculating R-factors(gt) etc. and is 
 not relevant to the choice of reflections for refinement.  R-factors based 
 on F^2^ are statistically about twice as large as those based on F, and R- 
 factors based on ALL data will be even larger. 
; 
 
_refine_ls_structure_factor_coef  Fsqd  
_refine_ls_matrix_type            full 
_refine_ls_weighting_scheme       calc  
_refine_ls_weighting_details 
 'calc w=1/[\s^2^(Fo^2^)+(0.1505P)^2^+12.9710P] where P=(Fo^2^+2Fc^2^)/3' 
_atom_sites_solution_primary      direct 
_atom_sites_solution_secondary    difmap 
_atom_sites_solution_hydrogens    geom 
_refine_ls_hydrogen_treatment     constr 
_refine_ls_extinction_method      none 
_refine_ls_extinction_coef        .
_refine_ls_number_reflns          14307 
_refine_ls_number_parameters      697 
_refine_ls_number_restraints      196 
_refine_ls_R_factor_all           0.1375 
_refine_ls_R_factor_gt            0.0932 
_refine_ls_wR_factor_ref          0.2875 
_refine_ls_wR_factor_gt           0.2520 
_refine_ls_goodness_of_fit_ref    1.039 
_refine_ls_restrained_S_all       1.057 
_refine_ls_shift/su_max           0.001 
_refine_ls_shift/su_mean          0.000 
 
loop_ 
 _atom_site_label 
 _atom_site_type_symbol 
 _atom_site_fract_x 
 _atom_site_fract_y 
 _atom_site_fract_z 
 _atom_site_U_iso_or_equiv 
 _atom_site_adp_type 
 _atom_site_occupancy 
 _atom_site_symmetry_multiplicity 
 _atom_site_calc_flag 
 _atom_site_refinement_flags 
 _atom_site_disorder_assembly 
 _atom_site_disorder_group 
Fe1 Fe 0.29742(3) 0.79568(4) 0.74553(3) 0.03158(19) Uani 1 1 d . . . 
B1 B 0.1924(2) 0.9751(3) 0.7617(2) 0.0346(10) Uani 1 1 d . . . 
B2 B 0.4591(2) 0.7717(3) 0.8170(2) 0.0311(9) Uani 1 1 d . . . 
N1 N 0.1605(2) 1.0056(3) 0.6330(2) 0.0607(12) Uani 1 1 d . A . 
C1 C 0.21908(18) 0.8627(3) 0.7681(2) 0.0336(8) Uani 1 1 d . . . 
C2 C 0.1982(2) 0.7873(3) 0.7213(2) 0.0375(9) Uani 1 1 d . . . 
H2 H 0.1667 0.7964 0.6774 0.045 Uiso 1 1 calc R . . 
C3 C 0.2275(2) 0.6975(3) 0.7468(2) 0.0424(10) Uani 1 1 d . . . 
H3 H 0.2194 0.6333 0.7248 0.051 Uiso 1 1 calc R . . 
C4 C 0.2695(2) 0.7156(3) 0.8093(2) 0.0393(9) Uani 1 1 d . . . 
H4 H 0.2968 0.6665 0.8394 0.047 Uiso 1 1 calc R . . 
C5 C 0.26511(19) 0.8164(3) 0.82203(19) 0.0326(8) Uani 1 1 d . . . 
H5 H 0.2904 0.8498 0.8624 0.039 Uiso 1 1 calc R . . 
C6 C 0.1762(2) 0.9981(3) 0.6870(2) 0.0441(10) Uani 1 1 d . . . 
C7 C 0.24877(18) 1.0441(3) 0.81176(19) 0.0317(8) Uani 1 1 d . . . 
C8 C 0.25515(18) 1.0420(3) 0.87702(19) 0.0317(8) Uani 1 1 d . . . 
C9 C 0.30436(19) 1.0955(3) 0.9219(2) 0.0343(9) Uani 1 1 d . . . 
H9 H 0.3079 1.0914 0.9654 0.041 Uiso 1 1 calc R . . 
C10 C 0.34772(19) 1.1538(3) 0.9048(2) 0.0344(9) Uani 1 1 d . . . 
C11 C 0.34097(19) 1.1580(3) 0.8412(2) 0.0361(9) Uani 1 1 d . . . 
H11 H 0.3697 1.1983 0.8282 0.043 Uiso 1 1 calc R . . 
C12 C 0.29344(19) 1.1051(3) 0.79536(19) 0.0332(8) Uani 1 1 d . . . 
C13 C 0.2105(2) 0.9849(3) 0.9033(2) 0.0374(9) Uani 1 1 d . . . 
H13A H 0.2317 0.9754 0.9490 0.056 Uiso 1 1 calc R . . 
H13B H 0.2012 0.9217 0.8822 0.056 Uiso 1 1 calc R . . 
H13C H 0.1695 1.0204 0.8958 0.056 Uiso 1 1 calc R . . 
C14 C 0.4021(2) 1.2079(3) 0.9540(2) 0.0447(11) Uani 1 1 d . . . 
H14A H 0.4078 1.1811 0.9961 0.067 Uiso 1 1 calc R . . 
H14B H 0.3908 1.2767 0.9532 0.067 Uiso 1 1 calc R . . 
H14C H 0.4429 1.2006 0.9444 0.067 Uiso 1 1 calc R . . 
C15 C 0.2924(2) 1.1198(4) 0.7278(2) 0.0443(10) Uani 1 1 d . . . 
H15A H 0.3319 1.1548 0.7280 0.066 Uiso 1 1 calc R . . 
H15B H 0.2537 1.1575 0.7042 0.066 Uiso 1 1 calc R . . 
H15C H 0.2911 1.0566 0.7073 0.066 Uiso 1 1 calc R . . 
C16 C 0.11913(19) 0.9923(3) 0.7703(2) 0.0384(9) Uani 1 1 d . . . 
C17 C 0.0785(2) 0.9206(3) 0.7826(2) 0.0422(10) Uani 1 1 d . . . 
C18 C 0.0185(2) 0.9452(4) 0.7901(3) 0.0597(14) Uani 1 1 d . . . 
H18 H -0.0078 0.8948 0.7978 0.072 Uiso 1 1 calc R . . 
C19 C -0.0038(2) 1.0388(4) 0.7867(4) 0.080(2) Uani 1 1 d . . . 
C20 C 0.0350(2) 1.1095(4) 0.7736(4) 0.079(2) Uani 1 1 d . . . 
H20 H 0.0204 1.1749 0.7700 0.095 Uiso 1 1 calc R . . 
C21 C 0.0949(2) 1.0889(3) 0.7654(3) 0.0514(13) Uani 1 1 d . . . 
C22 C 0.0946(2) 0.8140(3) 0.7890(3) 0.0508(12) Uani 1 1 d . . . 
H22A H 0.1394 0.8051 0.8178 0.076 Uiso 1 1 calc R . . 
H22B H 0.0906 0.7872 0.7473 0.076 Uiso 1 1 calc R . . 
H22C H 0.0642 0.7805 0.8062 0.076 Uiso 1 1 calc R . . 
C23 C -0.0685(3) 1.0644(6) 0.7968(6) 0.130(4) Uani 1 1 d . . . 
H23A H -0.0612 1.1166 0.8281 0.194 Uiso 1 1 calc R . . 
H23B H -0.0855 1.0071 0.8122 0.194 Uiso 1 1 calc R . . 
H23C H -0.1003 1.0858 0.7565 0.194 Uiso 1 1 calc R . . 
C24 C 0.1314(2) 1.1750(4) 0.7506(3) 0.0653(17) Uani 1 1 d . . . 
H24A H 0.1027 1.2320 0.7414 0.098 Uiso 1 1 calc R . . 
H24B H 0.1446 1.1600 0.7137 0.098 Uiso 1 1 calc R . . 
H24C H 0.1703 1.1886 0.7872 0.098 Uiso 1 1 calc R . . 
C25 C 0.39874(19) 0.7948(3) 0.75961(18) 0.0322(8) Uani 1 1 d . . . 
C26 C 0.3692(2) 0.8879(3) 0.73645(19) 0.0351(9) Uani 1 1 d . . . 
H26 H 0.3818 0.9513 0.7589 0.042 Uiso 1 1 calc R . . 
C27 C 0.3193(2) 0.8747(4) 0.6771(2) 0.0408(10) Uani 1 1 d . . . 
H27 H 0.2916 0.9271 0.6505 0.049 Uiso 1 1 calc R . . 
C28 C 0.3152(2) 0.7741(4) 0.6623(2) 0.0436(10) Uani 1 1 d . . . 
H28 H 0.2846 0.7436 0.6231 0.052 Uiso 1 1 calc R . . 
C29 C 0.3621(2) 0.7247(3) 0.7126(2) 0.0382(9) Uani 1 1 d . . . 
H29 H 0.3697 0.6531 0.7148 0.046 Uiso 1 1 calc R . . 
C30 C 0.47741(18) 0.6605(3) 0.83273(18) 0.0297(8) Uani 1 1 d . . . 
C31 C 0.47200(18) 0.6194(3) 0.88921(17) 0.0305(8) Uani 1 1 d . . . 
C32 C 0.4841(2) 0.5213(3) 0.90244(19) 0.0356(9) Uani 1 1 d . . . 
H32 H 0.4797 0.4956 0.9403 0.043 Uiso 1 1 calc R . . 
C33 C 0.5024(2) 0.4594(3) 0.8618(2) 0.0362(9) Uani 1 1 d . . . 
C34 C 0.5069(2) 0.4995(3) 0.8064(2) 0.0360(9) Uani 1 1 d . . . 
H34 H 0.5188 0.4588 0.7777 0.043 Uiso 1 1 calc R . . 
C35 C 0.49469(18) 0.5970(3) 0.79146(18) 0.0308(8) Uani 1 1 d . . . 
C36 C 0.4506(2) 0.6802(3) 0.9351(2) 0.0398(10) Uani 1 1 d . . . 
H36A H 0.4527 0.6412 0.9723 0.060 Uiso 1 1 calc R . . 
H36B H 0.4057 0.7025 0.9143 0.060 Uiso 1 1 calc R . . 
H36C H 0.4797 0.7363 0.9483 0.060 Uiso 1 1 calc R . . 
C37 C 0.5149(3) 0.3530(3) 0.8762(2) 0.0485(11) Uani 1 1 d . . . 
H37A H 0.5499 0.3308 0.8607 0.073 Uiso 1 1 calc R . . 
H37B H 0.4749 0.3162 0.8552 0.073 Uiso 1 1 calc R . . 
H37C H 0.5280 0.3428 0.9222 0.073 Uiso 1 1 calc R . . 
C38 C 0.5025(2) 0.6295(3) 0.72938(19) 0.0373(9) Uani 1 1 d . . . 
H38A H 0.4748 0.5896 0.6946 0.056 Uiso 1 1 calc R . . 
H38B H 0.5483 0.6222 0.7319 0.056 Uiso 1 1 calc R . . 
H38C H 0.4896 0.6976 0.7216 0.056 Uiso 1 1 calc R . . 
C39 C 0.50497(18) 0.8572(3) 0.85596(17) 0.0303(8) Uani 1 1 d . . . 
C40 C 0.56935(19) 0.8693(3) 0.85309(19) 0.0343(9) Uani 1 1 d . . . 
C41 C 0.6080(2) 0.9475(3) 0.8842(2) 0.0358(9) Uani 1 1 d . . . 
H41 H 0.6505 0.9543 0.8811 0.043 Uiso 1 1 calc R . . 
C42 C 0.5873(2) 1.0150(3) 0.91893(19) 0.0343(9) Uani 1 1 d . . . 
C43 C 0.5246(2) 1.0018(3) 0.92248(18) 0.0330(8) Uani 1 1 d . . . 
H43 H 0.5092 1.0460 0.9470 0.040 Uiso 1 1 calc R . . 
C44 C 0.48389(19) 0.9263(3) 0.89143(18) 0.0308(8) Uani 1 1 d . . . 
C45 C 0.5966(2) 0.8029(3) 0.8145(2) 0.0461(11) Uani 1 1 d . . . 
H45A H 0.6432 0.8168 0.8236 0.069 Uiso 1 1 calc R . . 
H45B H 0.5732 0.8133 0.7692 0.069 Uiso 1 1 calc R . . 
H45C H 0.5913 0.7354 0.8255 0.069 Uiso 1 1 calc R . . 
C46 C 0.6285(2) 1.1003(3) 0.9493(2) 0.0433(10) Uani 1 1 d . . . 
H46A H 0.6643 1.1076 0.9319 0.065 Uiso 1 1 calc R . . 
H46B H 0.6467 1.0900 0.9952 0.065 Uiso 1 1 calc R . . 
H46C H 0.6016 1.1591 0.9406 0.065 Uiso 1 1 calc R . . 
C47 C 0.41677(19) 0.9217(3) 0.89726(19) 0.0355(9) Uani 1 1 d . . . 
H47A H 0.4205 0.9208 0.9422 0.053 Uiso 1 1 calc R . . 
H47B H 0.3946 0.8626 0.8767 0.053 Uiso 1 1 calc R . . 
H47C H 0.3915 0.9785 0.8767 0.053 Uiso 1 1 calc R . . 
K1 K 0.16413(5) 1.03318(8) 0.51171(5) 0.0518(3) Uani 1 1 d . . . 
O1 O 0.0969(4) 0.8801(6) 0.4467(4) 0.097(3) Uiso 0.60 1 d PD A 1 
C101 C 0.1302(7) 0.7909(9) 0.4571(9) 0.102(5) Uiso 0.60 1 d PD A 1 
H10A H 0.1040 0.7433 0.4258 0.122 Uiso 0.60 1 calc PR A 1 
H10B H 0.1335 0.7669 0.4998 0.122 Uiso 0.60 1 calc PR A 1 
C102 C 0.1962(7) 0.7954(10) 0.4522(7) 0.104(5) Uiso 0.60 1 d PD A 1 
H10C H 0.2170 0.7308 0.4611 0.125 Uiso 0.60 1 calc PR A 1 
H10D H 0.1932 0.8141 0.4085 0.125 Uiso 0.60 1 calc PR A 1 
O2 O 0.2347(3) 0.8636(5) 0.4955(4) 0.0737(19) Uiso 0.60 1 d PD A 1 
C103 C 0.2918(4) 0.8779(7) 0.4801(5) 0.057(2) Uiso 0.60 1 d PD A 1 
H10E H 0.2803 0.9013 0.4358 0.068 Uiso 0.60 1 calc PR A 1 
H10F H 0.3155 0.8157 0.4834 0.068 Uiso 0.60 1 calc PR A 1 
C104 C 0.3337(4) 0.9486(6) 0.5229(4) 0.056(2) Uiso 0.60 1 d PD A 1 
H10G H 0.3455 0.9255 0.5672 0.067 Uiso 0.60 1 calc PR A 1 
H10H H 0.3745 0.9573 0.5126 0.067 Uiso 0.60 1 calc PR A 1 
O3 O 0.3000(3) 1.0373(4) 0.5161(3) 0.0539(14) Uiso 0.60 1 d PD A 1 
C105 C 0.3360(4) 1.1095(5) 0.5574(4) 0.0472(19) Uiso 0.60 1 d PD A 1 
H10I H 0.3805 1.1141 0.5545 0.057 Uiso 0.60 1 calc PR A 1 
H10J H 0.3399 1.0933 0.6017 0.057 Uiso 0.60 1 calc PR A 1 
C106 C 0.3017(4) 1.2021(6) 0.5393(5) 0.063(2) Uiso 0.60 1 d PD A 1 
H10K H 0.3305 1.2565 0.5604 0.076 Uiso 0.60 1 calc PR A 1 
H10L H 0.2887 1.2114 0.4928 0.076 Uiso 0.60 1 calc PR A 1 
O4 O 0.2465(3) 1.1993(5) 0.5582(3) 0.0727(19) Uiso 0.60 1 d PD A 1 
C107 C 0.2149(7) 1.2876(8) 0.5544(7) 0.103(4) Uiso 0.60 1 d PD A 1 
H10M H 0.2475 1.3406 0.5630 0.124 Uiso 0.60 1 calc PR A 1 
H10N H 0.1934 1.2903 0.5873 0.124 Uiso 0.60 1 calc PR A 1 
C108 C 0.1665(7) 1.3023(10) 0.4929(7) 0.129(6) Uiso 0.60 1 d PD A 1 
H10O H 0.1423 1.3633 0.4924 0.155 Uiso 0.60 1 calc PR A 1 
H10P H 0.1878 1.3063 0.4599 0.155 Uiso 0.60 1 calc PR A 1 
O5 O 0.1237(5) 1.2225(8) 0.4813(6) 0.121(3) Uiso 0.60 1 d PD A 1 
C109 C 0.0713(10) 1.2410(13) 0.4260(10) 0.205(12) Uiso 0.60 1 d PD A 1 
H10Q H 0.0884 1.2596 0.3916 0.246 Uiso 0.60 1 calc PR A 1 
H10R H 0.0453 1.2959 0.4334 0.246 Uiso 0.60 1 calc PR A 1 
C110 C 0.0298(5) 1.1567(7) 0.4067(6) 0.074(3) Uiso 0.60 1 d PD A 1 
H11A H 0.0056 1.1475 0.4369 0.089 Uiso 0.60 1 calc PR A 1 
H11B H -0.0027 1.1696 0.3645 0.089 Uiso 0.60 1 calc PR A 1 
O6 O 0.0625(3) 1.0700(5) 0.4034(3) 0.0721(18) Uiso 0.60 1 d PD A 1 
C111 C 0.0199(5) 0.9911(7) 0.3829(6) 0.087(3) Uiso 0.60 1 d PD A 1 
H11C H -0.0101 1.0029 0.3393 0.104 Uiso 0.60 1 calc PR A 1 
H11D H -0.0067 0.9827 0.4111 0.104 Uiso 0.60 1 calc PR A 1 
C112 C 0.0587(7) 0.9037(10) 0.3842(5) 0.110(5) Uiso 0.60 1 d PD A 1 
H11E H 0.0292 0.8490 0.3653 0.132 Uiso 0.60 1 calc PR A 1 
H11F H 0.0876 0.9145 0.3585 0.132 Uiso 0.60 1 calc PR A 1 
O1A O 0.0437(7) 0.9195(10) 0.4675(7) 0.115(5) Uiso 0.40 1 d PD A 2 
C201 C 0.0410(8) 0.8414(13) 0.4261(9) 0.087(5) Uiso 0.40 1 d PD A 2 
H20A H 0.0392 0.8644 0.3836 0.104 Uiso 0.40 1 calc PR A 2 
H20B H 0.0027 0.7993 0.4218 0.104 Uiso 0.40 1 calc PR A 2 
C202 C 0.1049(8) 0.7886(14) 0.4595(11) 0.091(6) Uiso 0.40 1 d PD A 2 
H20C H 0.1106 0.7811 0.5051 0.109 Uiso 0.40 1 calc PR A 2 
H20D H 0.1038 0.7232 0.4409 0.109 Uiso 0.40 1 calc PR A 2 
O2A O 0.1584(6) 0.8428(9) 0.4523(6) 0.093(4) Uiso 0.40 1 d PD A 2 
C203 C 0.2171(9) 0.7975(16) 0.4863(14) 0.116(8) Uiso 0.40 1 d PD A 2 
H20E H 0.2189 0.7318 0.4691 0.139 Uiso 0.40 1 calc PR A 2 
H20F H 0.2205 0.7911 0.5315 0.139 Uiso 0.40 1 calc PR A 2 
C204 C 0.2722(9) 0.8578(12) 0.4806(9) 0.075(5) Uiso 0.40 1 d PD A 2 
H20G H 0.3139 0.8225 0.4990 0.090 Uiso 0.40 1 calc PR A 2 
H20H H 0.2657 0.8703 0.4353 0.090 Uiso 0.40 1 calc PR A 2 
O3A O 0.2749(4) 0.9480(6) 0.5133(5) 0.062(2) Uiso 0.40 1 d PD A 2 
C205 C 0.3328(7) 1.0029(10) 0.5246(7) 0.059(3) Uiso 0.40 1 d PD A 2 
H20I H 0.3694 0.9713 0.5577 0.071 Uiso 0.40 1 calc PR A 2 
H20J H 0.3443 1.0078 0.4854 0.071 Uiso 0.40 1 calc PR A 2 
C206 C 0.3213(10) 1.0954(16) 0.5447(19) 0.23(2) Uiso 0.40 1 d PD A 2 
H20K H 0.3518 1.0990 0.5888 0.273 Uiso 0.40 1 calc PR A 2 
H20L H 0.3398 1.1395 0.5200 0.273 Uiso 0.40 1 calc PR A 2 
O4A O 0.2697(5) 1.1419(8) 0.5473(5) 0.080(3) Uiso 0.40 1 d PD A 2 
C207 C 0.2730(9) 1.2214(14) 0.5104(10) 0.099(6) Uiso 0.40 1 d PD A 2 
H20M H 0.2827 1.1997 0.4722 0.119 Uiso 0.40 1 calc PR A 2 
H20N H 0.3085 1.2653 0.5348 0.119 Uiso 0.40 1 calc PR A 2 
C208 C 0.2109(8) 1.2726(11) 0.4916(9) 0.083(5) Uiso 0.40 1 d PD A 2 
H20O H 0.1992 1.2904 0.5295 0.100 Uiso 0.40 1 calc PR A 2 
H20P H 0.2138 1.3327 0.4684 0.100 Uiso 0.40 1 calc PR A 2 
O5A O 0.1623(6) 1.2083(10) 0.4512(7) 0.114(5) Uiso 0.40 1 d PD A 2 
C209 C 0.1010(7) 1.2466(11) 0.4131(7) 0.067(4) Uiso 0.40 1 d PD A 2 
H20R H 0.1083 1.2883 0.3800 0.080 Uiso 0.40 1 calc PR A 2 
H20S H 0.0839 1.2884 0.4402 0.080 Uiso 0.40 1 calc PR A 2 
C210 C 0.0520(8) 1.1769(12) 0.3828(8) 0.076(4) Uiso 0.40 1 d PD A 2 
H21A H 0.0103 1.2099 0.3602 0.091 Uiso 0.40 1 calc PR A 2 
H21B H 0.0656 1.1389 0.3516 0.091 Uiso 0.40 1 calc PR A 2 
O6A O 0.0444(6) 1.1163(10) 0.4295(6) 0.094(4) Uiso 0.40 1 d PD A 2 
C211 C -0.0098(9) 1.0554(13) 0.4004(9) 0.089(5) Uiso 0.40 1 d PD A 2 
H21C H -0.0056 1.0270 0.3612 0.107 Uiso 0.40 1 calc PR A 2 
H21D H -0.0507 1.0939 0.3886 0.107 Uiso 0.40 1 calc PR A 2 
C212 C -0.0127(13) 0.9794(19) 0.4434(17) 0.193(16) Uiso 0.40 1 d PD A 2 
H21E H -0.0219 1.0093 0.4799 0.231 Uiso 0.40 1 calc PR A 2 
H21F H -0.0503 0.9371 0.4215 0.231 Uiso 0.40 1 calc PR A 2 
C1S C 0.7402(3) 0.6203(7) 0.1986(2) 0.086(2) Uiso 0.80 1 d PDU B 3 
H1S H 0.7313 0.6911 0.1907 0.103 Uiso 0.80 1 calc PRD B 3 
CL1S Cl 0.66594(12) 0.55876(18) 0.1696(2) 0.198(2) Uani 0.80 1 d PDU B 3 
CL2S Cl 0.79385(17) 0.5841(2) 0.15843(13) 0.1494(11) Uani 0.80 1 d PDU B 3 
CL3S Cl 0.77623(12) 0.60318(18) 0.28014(14) 0.1196(8) Uani 0.80 1 d PDU B 3 
C1SA C 0.7501(3) 0.5436(9) 0.2067(3) 0.080 Uiso 0.20 1 d PDU C 4 
H1SA H 0.7589 0.4727 0.2146 0.096 Uiso 0.20 1 calc PRD C 4 
Cl1A Cl 0.66594(12) 0.55876(18) 0.1696(2) 0.198(2) Uani 0.20 1 d PDU C 4 
Cl2A Cl 0.79385(17) 0.5841(2) 0.15843(13) 0.1494(11) Uani 0.20 1 d PDU C 4 
Cl3A Cl 0.77623(12) 0.60318(18) 0.28014(14) 0.1196(8) Uani 0.20 1 d PDU C 4 
C2S C 0.975(2) 0.435(3) 0.487(2) 0.126(13) Uiso 0.25 1 d P D 5 
H2SA H 1.0201 0.4099 0.5108 0.152 Uiso 0.25 1 calc PR D 5 
Cl5S Cl 0.9372(7) 0.3431(11) 0.4330(7) 0.154(4) Uiso 0.25 1 d P D 5 
Cl6S Cl 0.9435(6) 0.4673(9) 0.5414(6) 0.130(3) Uiso 0.25 1 d P . 5 
Cl4S Cl 0.9883(9) 0.5381(13) 0.4368(9) 0.182(6) Uiso 0.25 1 d P . 5 
O1S O 0.1232(8) 0.3931(11) 0.5817(8) 0.071(4) Uiso 0.25 1 d PD E 6 
C3S C 0.1658(15) 0.5469(19) 0.5702(14) 0.086(8) Uiso 0.25 1 d PD E 6 
H3SA H 0.2054 0.5834 0.5725 0.128 Uiso 0.25 1 calc PR E 6 
H3SB H 0.1356 0.5890 0.5826 0.128 Uiso 0.25 1 calc PR E 6 
H3SC H 0.1447 0.5238 0.5268 0.128 Uiso 0.25 1 calc PR E 6 
C4S C 0.185(2) 0.459(2) 0.6159(18) 0.125(13) Uiso 0.25 1 d PD E 6 
H4SA H 0.1869 0.4764 0.6596 0.150 Uiso 0.25 1 calc PR E 6 
H4SB H 0.2261 0.4287 0.6164 0.150 Uiso 0.25 1 calc PR E 6 
C5S C 0.124(3) 0.283(3) 0.560(3) 0.20(3) Uiso 0.25 1 d PD E 6 
H5SA H 0.1136 0.2763 0.5141 0.242 Uiso 0.25 1 calc PR E 6 
H5SB H 0.1657 0.2503 0.5830 0.242 Uiso 0.25 1 calc PR E 6 
C6S C 0.0674(17) 0.247(2) 0.5828(18) 0.106(10) Uiso 0.25 1 d PD E 6 
H6SA H 0.0415 0.1987 0.5528 0.158 Uiso 0.25 1 calc PR E 6 
H6SB H 0.0394 0.3018 0.5849 0.158 Uiso 0.25 1 calc PR E 6 
H6SC H 0.0855 0.2175 0.6250 0.158 Uiso 0.25 1 calc PR E 6 
 
loop_ 
 _atom_site_aniso_label 
 _atom_site_aniso_U_11 
 _atom_site_aniso_U_22 
 _atom_site_aniso_U_33 
 _atom_site_aniso_U_23 
 _atom_site_aniso_U_13 
 _atom_site_aniso_U_12 
Fe1 0.0294(3) 0.0342(3) 0.0277(3) -0.0031(2) 0.0048(2) -0.0017(2) 
B1 0.029(2) 0.032(2) 0.035(2) 0.0006(18) -0.0004(18) -0.0022(17) 
B2 0.032(2) 0.039(2) 0.025(2) -0.0034(17) 0.0136(17) 0.0016(18) 
N1 0.064(3) 0.059(3) 0.042(2) 0.006(2) -0.006(2) -0.009(2) 
C1 0.0248(18) 0.034(2) 0.037(2) -0.0028(16) 0.0038(15) -0.0036(15) 
C2 0.0285(19) 0.040(2) 0.039(2) -0.0071(18) 0.0033(17) -0.0055(16) 
C3 0.039(2) 0.034(2) 0.053(3) -0.0075(19) 0.013(2) -0.0052(18) 
C4 0.037(2) 0.036(2) 0.046(2) 0.0044(18) 0.0153(19) 0.0038(17) 
C5 0.0299(19) 0.036(2) 0.032(2) 0.0011(16) 0.0105(16) -0.0034(16) 
C6 0.042(2) 0.038(2) 0.041(3) 0.0017(19) -0.0022(19) -0.0053(19) 
C7 0.0251(18) 0.0307(19) 0.033(2) -0.0014(15) 0.0011(15) 0.0017(15) 
C8 0.0284(19) 0.0297(19) 0.034(2) -0.0014(15) 0.0063(16) 0.0002(15) 
C9 0.0297(19) 0.034(2) 0.035(2) -0.0035(16) 0.0036(16) 0.0033(16) 
C10 0.0289(19) 0.0279(19) 0.041(2) -0.0057(16) 0.0033(16) -0.0009(15) 
C11 0.0293(19) 0.029(2) 0.045(2) 0.0010(17) 0.0055(17) -0.0022(15) 
C12 0.0326(19) 0.0295(19) 0.033(2) 0.0017(15) 0.0048(16) 0.0011(15) 
C13 0.031(2) 0.041(2) 0.039(2) -0.0034(18) 0.0097(17) -0.0022(17) 
C14 0.040(2) 0.039(2) 0.046(3) -0.0099(19) 0.0021(19) -0.0059(18) 
C15 0.044(2) 0.048(3) 0.038(2) 0.0045(19) 0.0095(19) -0.011(2) 
C16 0.0264(19) 0.033(2) 0.045(2) -0.0030(18) -0.0020(17) -0.0001(16) 
C17 0.028(2) 0.036(2) 0.053(3) -0.0036(19) 0.0012(18) -0.0036(17) 
C18 0.030(2) 0.050(3) 0.092(4) -0.003(3) 0.010(2) -0.005(2) 
C19 0.029(2) 0.052(3) 0.153(7) 0.000(4) 0.021(3) 0.004(2) 
C20 0.031(2) 0.040(3) 0.154(7) -0.001(3) 0.015(3) 0.007(2) 
C21 0.030(2) 0.034(2) 0.077(4) 0.000(2) -0.001(2) 0.0017(17) 
C22 0.038(2) 0.038(2) 0.079(4) 0.002(2) 0.023(2) -0.0031(19) 
C23 0.051(4) 0.073(5) 0.277(14) 0.003(6) 0.072(6) 0.010(3) 
C24 0.036(2) 0.035(2) 0.113(5) 0.010(3) 0.008(3) -0.001(2) 
C25 0.0319(19) 0.037(2) 0.0272(19) -0.0034(16) 0.0085(15) 0.0006(16) 
C26 0.035(2) 0.042(2) 0.028(2) 0.0020(16) 0.0087(16) -0.0025(17) 
C27 0.038(2) 0.053(3) 0.028(2) 0.0037(18) 0.0052(17) 0.0013(19) 
C28 0.039(2) 0.062(3) 0.026(2) -0.0093(19) 0.0065(17) -0.005(2) 
C29 0.035(2) 0.044(2) 0.032(2) -0.0106(17) 0.0065(17) 0.0001(17) 
C30 0.0255(18) 0.036(2) 0.0264(18) -0.0058(15) 0.0073(14) -0.0050(15) 
C31 0.0265(18) 0.039(2) 0.0238(18) -0.0047(15) 0.0050(14) -0.0043(15) 
C32 0.038(2) 0.040(2) 0.0275(19) -0.0002(16) 0.0086(16) -0.0082(17) 
C33 0.036(2) 0.032(2) 0.038(2) -0.0019(17) 0.0082(17) -0.0050(16) 
C34 0.037(2) 0.036(2) 0.035(2) -0.0079(17) 0.0124(17) -0.0035(17) 
C35 0.0267(18) 0.036(2) 0.0289(19) -0.0063(15) 0.0085(15) -0.0067(15) 
C36 0.043(2) 0.049(2) 0.029(2) -0.0022(18) 0.0136(18) 0.0005(19) 
C37 0.064(3) 0.037(2) 0.043(3) -0.0037(19) 0.016(2) -0.008(2) 
C38 0.046(2) 0.038(2) 0.031(2) -0.0064(17) 0.0166(18) -0.0031(18) 
C39 0.0286(18) 0.035(2) 0.0247(18) 0.0002(15) 0.0052(15) 0.0019(15) 
C40 0.032(2) 0.038(2) 0.033(2) -0.0033(16) 0.0099(16) -0.0015(16) 
C41 0.032(2) 0.039(2) 0.036(2) 0.0023(17) 0.0108(17) -0.0028(17) 
C42 0.037(2) 0.033(2) 0.0272(19) 0.0037(15) 0.0015(16) -0.0002(16) 
C43 0.037(2) 0.033(2) 0.0255(19) -0.0003(15) 0.0064(16) 0.0014(16) 
C44 0.0312(19) 0.034(2) 0.0233(18) -0.0013(15) 0.0040(15) 0.0023(15) 
C45 0.043(2) 0.046(3) 0.059(3) -0.017(2) 0.029(2) -0.010(2) 
C46 0.048(2) 0.038(2) 0.040(2) 0.0010(18) 0.009(2) -0.0093(19) 
C47 0.0289(19) 0.045(2) 0.030(2) -0.0089(17) 0.0068(16) 0.0018(17) 
K1 0.0530(6) 0.0533(6) 0.0400(6) -0.0076(4) 0.0029(5) 0.0048(5) 
CL1S 0.0797(15) 0.0720(14) 0.364(6) 0.001(2) -0.033(2) -0.0108(11) 
CL2S 0.173(3) 0.137(2) 0.1054(19) -0.0056(17) 0.0001(18) -0.029(2) 
CL3S 0.1135(17) 0.0948(15) 0.157(2) -0.0296(15) 0.0535(16) -0.0091(13) 
Cl1A 0.0797(15) 0.0720(14) 0.364(6) 0.001(2) -0.033(2) -0.0108(11) 
Cl2A 0.173(3) 0.137(2) 0.1054(19) -0.0056(17) 0.0001(18) -0.029(2) 
Cl3A 0.1135(17) 0.0948(15) 0.157(2) -0.0296(15) 0.0535(16) -0.0091(13) 
 
_geom_special_details 
; 
 All esds (except the esd in the dihedral angle between two l.s. planes) 
 are estimated using the full covariance matrix.  The cell esds are taken 
 into account individually in the estimation of esds in distances, angles 
 and torsion angles; correlations between esds in cell parameters are only 
 used when they are defined by crystal symmetry.  An approximate (isotropic) 
 treatment of cell esds is used for estimating esds involving l.s. planes. 
; 
 
loop_ 
 _geom_bond_atom_site_label_1 
 _geom_bond_atom_site_label_2 
 _geom_bond_distance 
 _geom_bond_site_symmetry_2 
 _geom_bond_publ_flag 
Fe1 C29 2.035(4) . ? 
Fe1 C3 2.040(4) . ? 
Fe1 C2 2.040(4) . ? 
Fe1 C28 2.041(4) . ? 
Fe1 C4 2.044(4) . ? 
Fe1 C27 2.054(4) . ? 
Fe1 C5 2.068(4) . ? 
Fe1 C26 2.069(4) . ? 
Fe1 C25 2.112(4) . ? 
Fe1 C1 2.133(4) . ? 
B1 C6 1.619(7) . ? 
B1 C1 1.645(6) . ? 
B1 C7 1.658(6) . ? 
B1 C16 1.676(6) . ? 
B2 C25 1.534(6) . ? 
B2 C30 1.594(6) . ? 
B2 C39 1.602(6) . ? 
N1 C6 1.145(6) . ? 
N1 K1 2.760(5) . ? 
C1 C5 1.436(6) . ? 
C1 C2 1.437(6) . ? 
C2 C3 1.423(6) . ? 
C2 H2 1.0000 . ? 
C3 C4 1.415(7) . ? 
C3 H3 1.0000 . ? 
C4 C5 1.429(6) . ? 
C4 H4 1.0000 . ? 
C5 H5 1.0000 . ? 
C7 C8 1.418(6) . ? 
C7 C12 1.419(6) . ? 
C8 C9 1.408(5) . ? 
C8 C13 1.509(6) . ? 
C9 C10 1.384(6) . ? 
C9 H9 0.9500 . ? 
C10 C11 1.379(6) . ? 
C10 C14 1.516(6) . ? 
C11 C12 1.395(6) . ? 
C11 H11 0.9500 . ? 
C12 C15 1.516(6) . ? 
C13 H13A 0.9800 . ? 
C13 H13B 0.9800 . ? 
C13 H13C 0.9800 . ? 
C14 H14A 0.9800 . ? 
C14 H14B 0.9800 . ? 
C14 H14C 0.9800 . ? 
C15 H15A 0.9800 . ? 
C15 H15B 0.9800 . ? 
C15 H15C 0.9800 . ? 
C16 C17 1.411(6) . ? 
C16 C21 1.424(6) . ? 
C17 C18 1.404(7) . ? 
C17 C22 1.507(6) . ? 
C18 C19 1.373(8) . ? 
C18 H18 0.9500 . ? 
C19 C20 1.380(9) . ? 
C19 C23 1.533(9) . ? 
C20 C21 1.399(8) . ? 
C20 H20 0.9500 . ? 
C21 C24 1.521(7) . ? 
C22 H22A 0.9800 . ? 
C22 H22B 0.9800 . ? 
C22 H22C 0.9800 . ? 
C23 H23A 0.9800 . ? 
C23 H23B 0.9800 . ? 
C23 H23C 0.9800 . ? 
C24 H24A 0.9800 . ? 
C24 H24B 0.9800 . ? 
C24 H24C 0.9800 . ? 
C25 C26 1.453(6) . ? 
C25 C29 1.455(6) . ? 
C26 C27 1.418(6) . ? 
C26 H26 1.0000 . ? 
C27 C28 1.423(7) . ? 
C27 H27 1.0000 . ? 
C28 C29 1.416(6) . ? 
C28 H28 1.0000 . ? 
C29 H29 1.0000 . ? 
C30 C35 1.408(5) . ? 
C30 C31 1.422(5) . ? 
C31 C32 1.393(6) . ? 
C31 C36 1.508(6) . ? 
C32 C33 1.395(6) . ? 
C32 H32 0.9500 . ? 
C33 C34 1.386(6) . ? 
C33 C37 1.509(6) . ? 
C34 C35 1.391(6) . ? 
C34 H34 0.9500 . ? 
C35 C38 1.518(6) . ? 
C36 H36A 0.9800 . ? 
C36 H36B 0.9800 . ? 
C36 H36C 0.9800 . ? 
C37 H37A 0.9800 . ? 
C37 H37B 0.9800 . ? 
C37 H37C 0.9800 . ? 
C38 H38A 0.9800 . ? 
C38 H38B 0.9800 . ? 
C38 H38C 0.9800 . ? 
C39 C44 1.408(5) . ? 
C39 C40 1.427(6) . ? 
C40 C41 1.402(6) . ? 
C40 C45 1.505(6) . ? 
C41 C42 1.379(6) . ? 
C41 H41 0.9500 . ? 
C42 C43 1.397(6) . ? 
C42 C46 1.499(6) . ? 
C43 C44 1.393(6) . ? 
C43 H43 0.9500 . ? 
C44 C47 1.503(5) . ? 
C45 H45A 0.9800 . ? 
C45 H45B 0.9800 . ? 
C45 H45C 0.9800 . ? 
C46 H46A 0.9800 . ? 
C46 H46B 0.9800 . ? 
C46 H46C 0.9800 . ? 
C47 H47A 0.9800 . ? 
C47 H47B 0.9800 . ? 
C47 H47C 0.9800 . ? 
K1 O4A 2.630(11) . ? 
K1 O3A 2.662(9) . ? 
K1 O1 2.701(9) . ? 
K1 O6 2.729(7) . ? 
K1 O5A 2.761(14) . ? 
K1 O5 2.767(11) . ? 
K1 O6A 2.877(13) . ? 
K1 O4 2.881(7) . ? 
K1 O2 2.882(7) . ? 
K1 O3 2.913(6) . ? 
K1 O1A 2.924(14) . ? 
O1 C101 1.407(7) . ? 
O1 C112 1.407(8) . ? 
C101 C102 1.471(9) . ? 
C101 H10A 0.9900 . ? 
C101 H10B 0.9900 . ? 
C102 O2 1.409(7) . ? 
C102 H10C 0.9900 . ? 
C102 H10D 0.9900 . ? 
O2 C103 1.404(7) . ? 
C103 C104 1.454(9) . ? 
C103 H10E 0.9900 . ? 
C103 H10F 0.9900 . ? 
C104 O3 1.408(7) . ? 
C104 H10G 0.9900 . ? 
C104 H10H 0.9900 . ? 
O3 C105 1.405(7) . ? 
C105 C106 1.467(9) . ? 
C105 H10I 0.9900 . ? 
C105 H10J 0.9900 . ? 
C106 O4 1.392(7) . ? 
C106 H10K 0.9900 . ? 
C106 H10L 0.9900 . ? 
O4 C107 1.387(7) . ? 
C107 C108 1.441(9) . ? 
C107 H10M 0.9900 . ? 
C107 H10N 0.9900 . ? 
C108 O5 1.408(8) . ? 
C108 H10O 0.9900 . ? 
C108 H10P 0.9900 . ? 
O5 C109 1.398(8) . ? 
C109 C110 1.446(10) . ? 
C109 H10Q 0.9900 . ? 
C109 H10R 0.9900 . ? 
C110 O6 1.404(7) . ? 
C110 H11A 0.9900 . ? 
C110 H11B 0.9900 . ? 
O6 C111 1.404(7) . ? 
C111 C112 1.465(9) . ? 
C111 H11C 0.9900 . ? 
C111 H11D 0.9900 . ? 
C112 H11E 0.9900 . ? 
C112 H11F 0.9900 . ? 
O1A C201 1.409(16) . ? 
O1A C212 1.425(19) . ? 
C201 C202 1.524(18) . ? 
C201 H20A 0.9900 . ? 
C201 H20B 0.9900 . ? 
C202 O2A 1.432(16) . ? 
C202 H20C 0.9900 . ? 
C202 H20D 0.9900 . ? 
O2A C203 1.397(17) . ? 
C203 C204 1.493(18) . ? 
C203 H20E 0.9900 . ? 
C203 H20F 0.9900 . ? 
C204 O3A 1.433(15) . ? 
C204 H20G 0.9900 . ? 
C204 H20H 0.9900 . ? 
O3A C205 1.413(13) . ? 
C205 C206 1.403(18) . ? 
C205 H20I 0.9900 . ? 
C205 H20J 0.9900 . ? 
C206 O4A 1.304(17) . ? 
C206 H20K 0.9900 . ? 
C206 H20L 0.9900 . ? 
O4A C207 1.388(16) . ? 
C207 C208 1.452(17) . ? 
C207 H20M 0.9900 . ? 
C207 H20N 0.9900 . ? 
C208 O5A 1.443(15) . ? 
C208 H20O 0.9900 . ? 
C208 H20P 0.9900 . ? 
O5A C209 1.423(15) . ? 
C209 C210 1.426(16) . ? 
C209 H20R 0.9900 . ? 
C209 H20S 0.9900 . ? 
C210 O6A 1.388(15) . ? 
C210 H21A 0.9900 . ? 
C210 H21B 0.9900 . ? 
O6A C211 1.416(15) . ? 
C211 C212 1.438(19) . ? 
C211 H21C 0.9900 . ? 
C211 H21D 0.9900 . ? 
C212 H21E 0.9900 . ? 
C212 H21F 0.9900 . ? 
C1S CL1S 1.743(5) . ? 
C1S CL3S 1.745(5) . ? 
C1S CL2S 1.758(5) . ? 
C1S H1S 1.0000 . ? 
C1SA H1SA 1.0000 . ? 
C2S Cl6S 1.65(5) . ? 
C2S Cl5S 1.76(5) . ? 
C2S Cl4S 1.89(5) . ? 
C2S H2SA 1.0000 . ? 
Cl6S Cl4S 1.40(2) 3_766 ? 
Cl4S Cl6S 1.40(2) 3_766 ? 
Cl4S C2S 1.66(5) 3_766 ? 
O1S C4S 1.58(4) . ? 
O1S C5S 1.59(4) . ? 
C3S C4S 1.549(10) . ? 
C3S H3SA 0.9800 . ? 
C3S H3SB 0.9800 . ? 
C3S H3SC 0.9800 . ? 
C4S H4SA 0.9900 . ? 
C4S H4SB 0.9900 . ? 
C5S C6S 1.548(10) . ? 
C5S H5SA 0.9900 . ? 
C5S H5SB 0.9900 . ? 
C6S H6SA 0.9800 . ? 
C6S H6SB 0.9800 . ? 
C6S H6SC 0.9800 . ? 
 
loop_ 
 _geom_angle_atom_site_label_1 
 _geom_angle_atom_site_label_2 
 _geom_angle_atom_site_label_3 
 _geom_angle 
 _geom_angle_site_symmetry_1 
 _geom_angle_site_symmetry_3 
 _geom_angle_publ_flag 
C29 Fe1 C3 106.78(18) . . ? 
C29 Fe1 C2 131.89(17) . . ? 
C3 Fe1 C2 40.83(18) . . ? 
C29 Fe1 C28 40.67(18) . . ? 
C3 Fe1 C28 106.27(19) . . ? 
C2 Fe1 C28 104.41(18) . . ? 
C29 Fe1 C4 112.85(18) . . ? 
C3 Fe1 C4 40.55(19) . . ? 
C2 Fe1 C4 68.10(18) . . ? 
C28 Fe1 C4 138.04(19) . . ? 
C29 Fe1 C27 68.41(19) . . ? 
C3 Fe1 C27 135.81(19) . . ? 
C2 Fe1 C27 108.27(18) . . ? 
C28 Fe1 C27 40.66(19) . . ? 
C4 Fe1 C27 176.16(17) . . ? 
C29 Fe1 C5 145.65(17) . . ? 
C3 Fe1 C5 68.00(17) . . ? 
C2 Fe1 C5 67.26(17) . . ? 
C28 Fe1 C5 171.66(17) . . ? 
C4 Fe1 C5 40.67(16) . . ? 
C27 Fe1 C5 139.81(17) . . ? 
C29 Fe1 C26 68.39(18) . . ? 
C3 Fe1 C26 174.27(18) . . ? 
C2 Fe1 C26 140.23(17) . . ? 
C28 Fe1 C26 68.10(18) . . ? 
C4 Fe1 C26 143.52(17) . . ? 
C27 Fe1 C26 40.24(16) . . ? 
C5 Fe1 C26 117.71(16) . . ? 
C29 Fe1 C25 41.03(15) . . ? 
C3 Fe1 C25 137.24(17) . . ? 
C2 Fe1 C25 172.62(16) . . ? 
C28 Fe1 C25 68.65(16) . . ? 
C4 Fe1 C25 115.08(17) . . ? 
C27 Fe1 C25 68.37(16) . . ? 
C5 Fe1 C25 119.70(15) . . ? 
C26 Fe1 C25 40.64(16) . . ? 
C29 Fe1 C1 171.76(16) . . ? 
C3 Fe1 C1 68.42(17) . . ? 
C2 Fe1 C1 40.21(16) . . ? 
C28 Fe1 C1 132.97(17) . . ? 
C4 Fe1 C1 68.25(16) . . ? 
C27 Fe1 C1 109.95(17) . . ? 
C5 Fe1 C1 39.95(16) . . ? 
C26 Fe1 C1 115.98(16) . . ? 
C25 Fe1 C1 146.70(15) . . ? 
C6 B1 C1 103.0(4) . . ? 
C6 B1 C7 116.4(4) . . ? 
C1 B1 C7 108.8(3) . . ? 
C6 B1 C16 101.4(3) . . ? 
C1 B1 C16 116.3(3) . . ? 
C7 B1 C16 110.9(3) . . ? 
C25 B2 C30 117.7(3) . . ? 
C25 B2 C39 120.4(4) . . ? 
C30 B2 C39 121.6(3) . . ? 
C6 N1 K1 162.0(4) . . ? 
C5 C1 C2 104.7(4) . . ? 
C5 C1 B1 128.2(4) . . ? 
C2 C1 B1 127.0(4) . . ? 
C5 C1 Fe1 67.6(2) . . ? 
C2 C1 Fe1 66.4(2) . . ? 
B1 C1 Fe1 132.3(3) . . ? 
C3 C2 C1 110.3(4) . . ? 
C3 C2 Fe1 69.6(2) . . ? 
C1 C2 Fe1 73.4(2) . . ? 
C3 C2 H2 124.8 . . ? 
C1 C2 H2 124.8 . . ? 
Fe1 C2 H2 124.8 . . ? 
C4 C3 C2 107.4(4) . . ? 
C4 C3 Fe1 69.9(2) . . ? 
C2 C3 Fe1 69.6(2) . . ? 
C4 C3 H3 126.3 . . ? 
C2 C3 H3 126.3 . . ? 
Fe1 C3 H3 126.3 . . ? 
C3 C4 C5 107.7(4) . . ? 
C3 C4 Fe1 69.6(3) . . ? 
C5 C4 Fe1 70.6(2) . . ? 
C3 C4 H4 126.1 . . ? 
C5 C4 H4 126.1 . . ? 
Fe1 C4 H4 126.1 . . ? 
C4 C5 C1 109.8(4) . . ? 
C4 C5 Fe1 68.8(2) . . ? 
C1 C5 Fe1 72.5(2) . . ? 
C4 C5 H5 125.1 . . ? 
C1 C5 H5 125.1 . . ? 
Fe1 C5 H5 125.1 . . ? 
N1 C6 B1 172.5(5) . . ? 
C8 C7 C12 115.7(3) . . ? 
C8 C7 B1 118.8(4) . . ? 
C12 C7 B1 125.5(4) . . ? 
C9 C8 C7 121.1(4) . . ? 
C9 C8 C13 115.4(4) . . ? 
C7 C8 C13 123.5(3) . . ? 
C10 C9 C8 122.1(4) . . ? 
C10 C9 H9 119.0 . . ? 
C8 C9 H9 119.0 . . ? 
C11 C10 C9 117.2(4) . . ? 
C11 C10 C14 121.3(4) . . ? 
C9 C10 C14 121.4(4) . . ? 
C10 C11 C12 122.4(4) . . ? 
C10 C11 H11 118.8 . . ? 
C12 C11 H11 118.8 . . ? 
C11 C12 C7 121.5(4) . . ? 
C11 C12 C15 115.2(4) . . ? 
C7 C12 C15 123.3(4) . . ? 
C8 C13 H13A 109.5 . . ? 
C8 C13 H13B 109.5 . . ? 
H13A C13 H13B 109.5 . . ? 
C8 C13 H13C 109.5 . . ? 
H13A C13 H13C 109.5 . . ? 
H13B C13 H13C 109.5 . . ? 
C10 C14 H14A 109.5 . . ? 
C10 C14 H14B 109.5 . . ? 
H14A C14 H14B 109.5 . . ? 
C10 C14 H14C 109.5 . . ? 
H14A C14 H14C 109.5 . . ? 
H14B C14 H14C 109.5 . . ? 
C12 C15 H15A 109.5 . . ? 
C12 C15 H15B 109.5 . . ? 
H15A C15 H15B 109.5 . . ? 
C12 C15 H15C 109.5 . . ? 
H15A C15 H15C 109.5 . . ? 
H15B C15 H15C 109.5 . . ? 
C17 C16 C21 115.7(4) . . ? 
C17 C16 B1 126.7(4) . . ? 
C21 C16 B1 117.5(4) . . ? 
C18 C17 C16 121.0(4) . . ? 
C18 C17 C22 114.8(4) . . ? 
C16 C17 C22 124.2(4) . . ? 
C19 C18 C17 122.9(5) . . ? 
C19 C18 H18 118.5 . . ? 
C17 C18 H18 118.5 . . ? 
C18 C19 C20 116.7(5) . . ? 
C18 C19 C23 122.1(6) . . ? 
C20 C19 C23 121.2(6) . . ? 
C19 C20 C21 122.7(5) . . ? 
C19 C20 H20 118.7 . . ? 
C21 C20 H20 118.7 . . ? 
C20 C21 C16 121.0(5) . . ? 
C20 C21 C24 116.1(4) . . ? 
C16 C21 C24 122.9(4) . . ? 
C17 C22 H22A 109.5 . . ? 
C17 C22 H22B 109.5 . . ? 
H22A C22 H22B 109.5 . . ? 
C17 C22 H22C 109.5 . . ? 
H22A C22 H22C 109.5 . . ? 
H22B C22 H22C 109.5 . . ? 
C19 C23 H23A 109.5 . . ? 
C19 C23 H23B 109.5 . . ? 
H23A C23 H23B 109.5 . . ? 
C19 C23 H23C 109.5 . . ? 
H23A C23 H23C 109.5 . . ? 
H23B C23 H23C 109.5 . . ? 
C21 C24 H24A 109.5 . . ? 
C21 C24 H24B 109.5 . . ? 
H24A C24 H24B 109.5 . . ? 
C21 C24 H24C 109.5 . . ? 
H24A C24 H24C 109.5 . . ? 
H24B C24 H24C 109.5 . . ? 
C26 C25 C29 105.0(3) . . ? 
C26 C25 B2 129.5(4) . . ? 
C29 C25 B2 125.3(4) . . ? 
C26 C25 Fe1 68.1(2) . . ? 
C29 C25 Fe1 66.6(2) . . ? 
B2 C25 Fe1 133.2(3) . . ? 
C27 C26 C25 109.3(4) . . ? 
C27 C26 Fe1 69.3(2) . . ? 
C25 C26 Fe1 71.3(2) . . ? 
C27 C26 H26 125.4 . . ? 
C25 C26 H26 125.4 . . ? 
Fe1 C26 H26 125.4 . . ? 
C26 C27 C28 108.2(4) . . ? 
C26 C27 Fe1 70.4(2) . . ? 
C28 C27 Fe1 69.2(3) . . ? 
C26 C27 H27 125.9 . . ? 
C28 C27 H27 125.9 . . ? 
Fe1 C27 H27 125.9 . . ? 
C29 C28 C27 108.1(4) . . ? 
C29 C28 Fe1 69.4(2) . . ? 
C27 C28 Fe1 70.2(2) . . ? 
C29 C28 H28 125.9 . . ? 
C27 C28 H28 125.9 . . ? 
Fe1 C28 H28 125.9 . . ? 
C28 C29 C25 109.3(4) . . ? 
C28 C29 Fe1 69.9(3) . . ? 
C25 C29 Fe1 72.3(2) . . ? 
C28 C29 H29 125.3 . . ? 
C25 C29 H29 125.3 . . ? 
Fe1 C29 H29 125.3 . . ? 
C35 C30 C31 116.8(4) . . ? 
C35 C30 B2 123.7(3) . . ? 
C31 C30 B2 119.4(3) . . ? 
C32 C31 C30 120.7(4) . . ? 
C32 C31 C36 118.3(4) . . ? 
C30 C31 C36 120.9(4) . . ? 
C31 C32 C33 122.0(4) . . ? 
C31 C32 H32 119.0 . . ? 
C33 C32 H32 119.0 . . ? 
C34 C33 C32 117.1(4) . . ? 
C34 C33 C37 121.2(4) . . ? 
C32 C33 C37 121.7(4) . . ? 
C33 C34 C35 122.4(4) . . ? 
C33 C34 H34 118.8 . . ? 
C35 C34 H34 118.8 . . ? 
C34 C35 C30 121.0(4) . . ? 
C34 C35 C38 115.8(4) . . ? 
C30 C35 C38 123.2(4) . . ? 
C31 C36 H36A 109.5 . . ? 
C31 C36 H36B 109.5 . . ? 
H36A C36 H36B 109.5 . . ? 
C31 C36 H36C 109.5 . . ? 
H36A C36 H36C 109.5 . . ? 
H36B C36 H36C 109.5 . . ? 
C33 C37 H37A 109.5 . . ? 
C33 C37 H37B 109.5 . . ? 
H37A C37 H37B 109.5 . . ? 
C33 C37 H37C 109.5 . . ? 
H37A C37 H37C 109.5 . . ? 
H37B C37 H37C 109.5 . . ? 
C35 C38 H38A 109.5 . . ? 
C35 C38 H38B 109.5 . . ? 
H38A C38 H38B 109.5 . . ? 
C35 C38 H38C 109.5 . . ? 
H38A C38 H38C 109.5 . . ? 
H38B C38 H38C 109.5 . . ? 
C44 C39 C40 116.7(4) . . ? 
C44 C39 B2 123.1(3) . . ? 
C40 C39 B2 120.1(3) . . ? 
C41 C40 C39 120.1(4) . . ? 
C41 C40 C45 117.9(4) . . ? 
C39 C40 C45 121.9(4) . . ? 
C42 C41 C40 123.1(4) . . ? 
C42 C41 H41 118.5 . . ? 
C40 C41 H41 118.5 . . ? 
C41 C42 C43 116.6(4) . . ? 
C41 C42 C46 121.9(4) . . ? 
C43 C42 C46 121.5(4) . . ? 
C44 C43 C42 122.5(4) . . ? 
C44 C43 H43 118.7 . . ? 
C42 C43 H43 118.7 . . ? 
C43 C44 C39 121.1(4) . . ? 
C43 C44 C47 117.5(4) . . ? 
C39 C44 C47 121.4(3) . . ? 
C40 C45 H45A 109.5 . . ? 
C40 C45 H45B 109.5 . . ? 
H45A C45 H45B 109.5 . . ? 
C40 C45 H45C 109.5 . . ? 
H45A C45 H45C 109.5 . . ? 
H45B C45 H45C 109.5 . . ? 
C42 C46 H46A 109.5 . . ? 
C42 C46 H46B 109.5 . . ? 
H46A C46 H46B 109.5 . . ? 
C42 C46 H46C 109.5 . . ? 
H46A C46 H46C 109.5 . . ? 
H46B C46 H46C 109.5 . . ? 
C44 C47 H47A 109.5 . . ? 
C44 C47 H47B 109.5 . . ? 
H47A C47 H47B 109.5 . . ? 
C44 C47 H47C 109.5 . . ? 
H47A C47 H47C 109.5 . . ? 
H47B C47 H47C 109.5 . . ? 
O4A K1 O3A 63.7(3) . . ? 
O4A K1 O1 150.4(3) . . ? 
O3A K1 O1 89.2(3) . . ? 
O4A K1 O6 121.9(3) . . ? 
O3A K1 O6 123.7(3) . . ? 
O1 K1 O6 62.3(2) . . ? 
O4A K1 N1 94.9(3) . . ? 
O3A K1 N1 104.0(2) . . ? 
O1 K1 N1 103.5(2) . . ? 
O6 K1 N1 128.29(19) . . ? 
O4A K1 O5A 61.3(4) . . ? 
O3A K1 O5A 105.1(4) . . ? 
O1 K1 O5A 120.2(3) . . ? 
O6 K1 O5A 61.7(3) . . ? 
N1 K1 O5A 126.9(4) . . ? 
O4A K1 O5 73.1(4) . . ? 
O3A K1 O5 129.1(3) . . ? 
O1 K1 O5 122.3(3) . . ? 
O6 K1 O5 60.6(3) . . ? 
N1 K1 O5 105.2(3) . . ? 
O5A K1 O5 26.1(4) . . ? 
O4A K1 O6A 118.5(3) . . ? 
O3A K1 O6A 143.5(3) . . ? 
O1 K1 O6A 75.8(3) . . ? 
O6 K1 O6A 20.9(3) . . ? 
N1 K1 O6A 111.7(3) . . ? 
O5A K1 O6A 58.3(3) . . ? 
O5 K1 O6A 47.2(4) . . ? 
O4A K1 O4 20.5(2) . . ? 
O3A K1 O4 84.1(2) . . ? 
O1 K1 O4 167.6(2) . . ? 
O6 K1 O4 113.2(2) . . ? 
N1 K1 O4 88.30(17) . . ? 
O5A K1 O4 52.2(3) . . ? 
O5 K1 O4 56.4(3) . . ? 
O6A K1 O4 103.6(3) . . ? 
O4A K1 O2 93.2(3) . . ? 
O3A K1 O2 29.6(2) . . ? 
O1 K1 O2 60.8(2) . . ? 
O6 K1 O2 110.3(2) . . ? 
N1 K1 O2 101.45(19) . . ? 
O5A K1 O2 124.9(4) . . ? 
O5 K1 O2 150.9(3) . . ? 
O6A K1 O2 130.4(3) . . ? 
O4 K1 O2 113.6(2) . . ? 
O4A K1 O3 37.8(3) . . ? 
O3A K1 O3 27.3(2) . . ? 
O1 K1 O3 113.2(2) . . ? 
O6 K1 O3 122.5(2) . . ? 
N1 K1 O3 108.91(16) . . ? 
O5A K1 O3 81.4(3) . . ? 
O5 K1 O3 103.0(3) . . ? 
O6A K1 O3 134.6(3) . . ? 
O4 K1 O3 58.19(17) . . ? 
O2 K1 O3 56.53(18) . . ? 
O4A K1 O1A 177.2(4) . . ? 
O3A K1 O1A 117.9(3) . . ? 
O1 K1 O1A 30.2(3) . . ? 
O6 K1 O1A 55.3(3) . . ? 
N1 K1 O1A 86.9(3) . . ? 
O5A K1 O1A 115.9(4) . . ? 
O5 K1 O1A 104.4(4) . . ? 
O6A K1 O1A 58.8(4) . . ? 
O4 K1 O1A 157.9(3) . . ? 
O2 K1 O1A 88.5(3) . . ? 
O3 K1 O1A 143.3(3) . . ? 
C101 O1 C112 117.9(11) . . ? 
C101 O1 K1 116.1(8) . . ? 
C112 O1 K1 112.9(8) . . ? 
O1 C101 C102 114.1(13) . . ? 
O1 C101 H10A 108.7 . . ? 
C102 C101 H10A 108.7 . . ? 
O1 C101 H10B 108.7 . . ? 
C102 C101 H10B 108.7 . . ? 
H10A C101 H10B 107.6 . . ? 
O2 C102 C101 110.4(11) . . ? 
O2 C102 H10C 109.6 . . ? 
C101 C102 H10C 109.6 . . ? 
O2 C102 H10D 109.6 . . ? 
C101 C102 H10D 109.6 . . ? 
H10C C102 H10D 108.1 . . ? 
C103 O2 C102 107.3(9) . . ? 
C103 O2 K1 117.6(6) . . ? 
C102 O2 K1 114.1(7) . . ? 
O2 C103 C104 110.1(7) . . ? 
O2 C103 H10E 109.6 . . ? 
C104 C103 H10E 109.6 . . ? 
O2 C103 H10F 109.6 . . ? 
C104 C103 H10F 109.6 . . ? 
H10E C103 H10F 108.2 . . ? 
O3 C104 C103 108.9(7) . . ? 
O3 C104 H10G 109.9 . . ? 
C103 C104 H10G 109.9 . . ? 
O3 C104 H10H 109.9 . . ? 
C103 C104 H10H 109.9 . . ? 
H10G C104 H10H 108.3 . . ? 
C105 O3 C104 113.0(6) . . ? 
C105 O3 K1 111.8(5) . . ? 
C104 O3 K1 118.0(5) . . ? 
O3 C105 C106 108.3(7) . . ? 
O3 C105 H10I 110.0 . . ? 
C106 C105 H10I 110.0 . . ? 
O3 C105 H10J 110.0 . . ? 
C106 C105 H10J 110.0 . . ? 
H10I C105 H10J 108.4 . . ? 
O4 C106 C105 107.4(7) . . ? 
O4 C106 H10K 110.2 . . ? 
C105 C106 H10K 110.2 . . ? 
O4 C106 H10L 110.2 . . ? 
C105 C106 H10L 110.2 . . ? 
H10K C106 H10L 108.5 . . ? 
C107 O4 C106 114.4(9) . . ? 
C107 O4 K1 116.2(7) . . ? 
C106 O4 K1 113.8(6) . . ? 
O4 C107 C108 111.8(11) . . ? 
O4 C107 H10M 109.3 . . ? 
C108 C107 H10M 109.3 . . ? 
O4 C107 H10N 109.3 . . ? 
C108 C107 H10N 109.3 . . ? 
H10M C107 H10N 107.9 . . ? 
O5 C108 C107 107.1(12) . . ? 
O5 C108 H10O 110.3 . . ? 
C107 C108 H10O 110.3 . . ? 
O5 C108 H10P 110.3 . . ? 
C107 C108 H10P 110.3 . . ? 
H10O C108 H10P 108.6 . . ? 
C109 O5 C108 108.3(11) . . ? 
C109 O5 K1 119.2(10) . . ? 
C108 O5 K1 123.8(9) . . ? 
O5 C109 C110 111.1(12) . . ? 
O5 C109 H10Q 109.4 . . ? 
C110 C109 H10Q 109.4 . . ? 
O5 C109 H10R 109.4 . . ? 
C110 C109 H10R 109.4 . . ? 
H10Q C109 H10R 108.0 . . ? 
O6 C110 C109 115.2(13) . . ? 
O6 C110 H11A 108.5 . . ? 
C109 C110 H11A 108.5 . . ? 
O6 C110 H11B 108.5 . . ? 
C109 C110 H11B 108.5 . . ? 
H11A C110 H11B 107.5 . . ? 
C110 O6 C111 112.8(8) . . ? 
C110 O6 K1 112.7(7) . . ? 
C111 O6 K1 113.4(6) . . ? 
O6 C111 C112 108.7(10) . . ? 
O6 C111 K1 45.2(5) . . ? 
C112 C111 K1 76.7(7) . . ? 
O6 C111 H11C 110.0 . . ? 
C112 C111 H11C 110.0 . . ? 
K1 C111 H11C 153.2 . . ? 
O6 C111 H11D 110.0 . . ? 
C112 C111 H11D 110.0 . . ? 
K1 C111 H11D 92.6 . . ? 
H11C C111 H11D 108.3 . . ? 
O1 C112 C111 110.9(11) . . ? 
O1 C112 H11E 109.5 . . ? 
C111 C112 H11E 109.5 . . ? 
O1 C112 H11F 109.5 . . ? 
C111 C112 H11F 109.5 . . ? 
H11E C112 H11F 108.0 . . ? 
C201 O1A C212 110.5(18) . . ? 
C201 O1A K1 118.1(11) . . ? 
C212 O1A K1 112.1(15) . . ? 
O1A C201 C202 102.1(15) . . ? 
O1A C201 H20A 111.3 . . ? 
C202 C201 H20A 111.3 . . ? 
O1A C201 H20B 111.3 . . ? 
C202 C201 H20B 111.3 . . ? 
H20A C201 H20B 109.2 . . ? 
O2A C202 C201 109.5(14) . . ? 
O2A C202 H20C 109.8 . . ? 
C201 C202 H20C 109.8 . . ? 
O2A C202 H20D 109.8 . . ? 
C201 C202 H20D 109.8 . . ? 
H20C C202 H20D 108.2 . . ? 
C203 O2A C202 109.4(14) . . ? 
C203 O2A K1 105.0(13) . . ? 
C202 O2A K1 109.5(11) . . ? 
O2A C203 C204 108.3(16) . . ? 
O2A C203 H20E 110.0 . . ? 
C204 C203 H20E 110.0 . . ? 
O2A C203 H20F 110.0 . . ? 
C204 C203 H20F 110.0 . . ? 
H20E C203 H20F 108.4 . . ? 
O3A C204 C203 110.0(16) . . ? 
O3A C204 H20G 109.7 . . ? 
C203 C204 H20G 109.7 . . ? 
O3A C204 H20H 109.7 . . ? 
C203 C204 H20H 109.7 . . ? 
H20G C204 H20H 108.2 . . ? 
C205 O3A C204 116.3(11) . . ? 
C205 O3A K1 120.5(8) . . ? 
C204 O3A K1 119.3(9) . . ? 
C206 C205 O3A 107.7(14) . . ? 
C206 C205 H20I 110.2 . . ? 
O3A C205 H20I 110.2 . . ? 
C206 C205 H20J 110.2 . . ? 
O3A C205 H20J 110.2 . . ? 
H20I C205 H20J 108.5 . . ? 
O4A C206 C205 134.9(19) . . ? 
O4A C206 K1 46.6(9) . . ? 
C205 C206 K1 88.3(11) . . ? 
O4A C206 H20K 103.5 . . ? 
C205 C206 H20K 103.5 . . ? 
K1 C206 H20K 121.9 . . ? 
O4A C206 H20L 103.5 . . ? 
C205 C206 H20L 103.5 . . ? 
K1 C206 H20L 127.2 . . ? 
H20K C206 H20L 105.3 . . ? 
C206 O4A C207 98.7(18) . . ? 
C206 O4A K1 112.3(12) . . ? 
C207 O4A K1 118.7(10) . . ? 
O4A C207 C208 109.5(15) . . ? 
O4A C207 H20M 109.8 . . ? 
C208 C207 H20M 109.8 . . ? 
O4A C207 H20N 109.8 . . ? 
C208 C207 H20N 109.8 . . ? 
H20M C207 H20N 108.2 . . ? 
O5A C208 C207 107.2(14) . . ? 
O5A C208 K1 47.3(8) . . ? 
C207 C208 K1 77.6(10) . . ? 
O5A C208 H20O 110.3 . . ? 
C207 C208 H20O 110.3 . . ? 
K1 C208 H20O 87.6 . . ? 
O5A C208 H20P 110.3 . . ? 
C207 C208 H20P 110.3 . . ? 
K1 C208 H20P 157.0 . . ? 
H20O C208 H20P 108.5 . . ? 
C209 O5A C208 119.4(13) . . ? 
C209 O5A K1 118.5(10) . . ? 
C208 O5A K1 110.0(10) . . ? 
O5A C209 C210 115.8(13) . . ? 
O5A C209 H20R 108.3 . . ? 
C210 C209 H20R 108.3 . . ? 
O5A C209 H20S 108.3 . . ? 
C210 C209 H20S 108.3 . . ? 
H20R C209 H20S 107.4 . . ? 
O6A C210 C209 107.6(13) . . ? 
O6A C210 H21A 110.2 . . ? 
C209 C210 H21A 110.2 . . ? 
O6A C210 H21B 110.2 . . ? 
C209 C210 H21B 110.2 . . ? 
H21A C210 H21B 108.5 . . ? 
C210 O6A C211 107.4(13) . . ? 
C210 O6A K1 114.4(10) . . ? 
C211 O6A K1 119.6(11) . . ? 
O6A C211 C212 109.8(18) . . ? 
O6A C211 H21C 109.7 . . ? 
C212 C211 H21C 109.7 . . ? 
O6A C211 H21D 109.7 . . ? 
C212 C211 H21D 109.7 . . ? 
H21C C211 H21D 108.2 . . ? 
O1A C212 C211 117(2) . . ? 
O1A C212 H21E 108.0 . . ? 
C211 C212 H21E 108.0 . . ? 
O1A C212 H21F 108.0 . . ? 
C211 C212 H21F 108.0 . . ? 
H21E C212 H21F 107.3 . . ? 
CL1S C1S CL3S 111.3(4) . . ? 
CL1S C1S CL2S 110.9(4) . . ? 
CL3S C1S CL2S 110.5(4) . . ? 
CL1S C1S H1S 108.0 . . ? 
CL3S C1S H1S 108.0 . . ? 
CL2S C1S H1S 108.0 . . ? 
Cl6S C2S Cl5S 119(3) . . ? 
Cl6S C2S Cl4S 115(3) . . ? 
Cl5S C2S Cl4S 105(3) . . ? 
Cl6S C2S H2SA 105.7 . . ? 
Cl5S C2S H2SA 105.7 . . ? 
Cl4S C2S H2SA 105.7 . . ? 
Cl4S Cl6S C2S 65.8(18) 3_766 . ? 
Cl6S Cl4S C2S 64.3(18) 3_766 3_766 ? 
Cl6S Cl4S C2S 95.7(19) 3_766 . ? 
C2S Cl4S C2S 71(3) 3_766 . ? 
C4S O1S C5S 127(3) . . ? 
C3S C4S O1S 98(2) . . ? 
C3S C4S H4SA 112.2 . . ? 
O1S C4S H4SA 112.2 . . ? 
C3S C4S H4SB 112.2 . . ? 
O1S C4S H4SB 112.2 . . ? 
H4SA C4S H4SB 109.8 . . ? 
C6S C5S O1S 97(2) . . ? 
C6S C5S H5SA 112.3 . . ? 
O1S C5S H5SA 112.3 . . ? 
C6S C5S H5SB 112.3 . . ? 
O1S C5S H5SB 112.3 . . ? 
H5SA C5S H5SB 109.9 . . ? 
 
loop_ 
 _geom_torsion_atom_site_label_1 
 _geom_torsion_atom_site_label_2 
 _geom_torsion_atom_site_label_3 
 _geom_torsion_atom_site_label_4 
 _geom_torsion 
 _geom_torsion_site_symmetry_1 
 _geom_torsion_site_symmetry_2 
 _geom_torsion_site_symmetry_3 
 _geom_torsion_site_symmetry_4 
 _geom_torsion_publ_flag 
C6 B1 C1 C5 150.7(4) . . . . ? 
C7 B1 C1 C5 26.7(6) . . . . ? 
C16 B1 C1 C5 -99.4(5) . . . . ? 
C6 B1 C1 C2 -33.2(5) . . . . ? 
C7 B1 C1 C2 -157.2(4) . . . . ? 
C16 B1 C1 C2 76.7(5) . . . . ? 
C6 B1 C1 Fe1 57.3(4) . . . . ? 
C7 B1 C1 Fe1 -66.8(5) . . . . ? 
C16 B1 C1 Fe1 167.2(3) . . . . ? 
C3 Fe1 C1 C5 81.1(3) . . . . ? 
C2 Fe1 C1 C5 118.7(3) . . . . ? 
C28 Fe1 C1 C5 173.6(3) . . . . ? 
C4 Fe1 C1 C5 37.3(2) . . . . ? 
C27 Fe1 C1 C5 -146.3(2) . . . . ? 
C26 Fe1 C1 C5 -102.9(2) . . . . ? 
C25 Fe1 C1 C5 -65.6(4) . . . . ? 
C3 Fe1 C1 C2 -37.6(3) . . . . ? 
C28 Fe1 C1 C2 54.9(3) . . . . ? 
C4 Fe1 C1 C2 -81.4(3) . . . . ? 
C27 Fe1 C1 C2 95.0(3) . . . . ? 
C5 Fe1 C1 C2 -118.7(3) . . . . ? 
C26 Fe1 C1 C2 138.4(3) . . . . ? 
C25 Fe1 C1 C2 175.7(3) . . . . ? 
C3 Fe1 C1 B1 -156.9(4) . . . . ? 
C2 Fe1 C1 B1 -119.3(5) . . . . ? 
C28 Fe1 C1 B1 -64.4(4) . . . . ? 
C4 Fe1 C1 B1 159.3(4) . . . . ? 
C27 Fe1 C1 B1 -24.3(4) . . . . ? 
C5 Fe1 C1 B1 122.0(5) . . . . ? 
C26 Fe1 C1 B1 19.1(4) . . . . ? 
C25 Fe1 C1 B1 56.4(5) . . . . ? 
C5 C1 C2 C3 3.1(5) . . . . ? 
B1 C1 C2 C3 -173.8(4) . . . . ? 
Fe1 C1 C2 C3 60.1(3) . . . . ? 
C5 C1 C2 Fe1 -57.0(3) . . . . ? 
B1 C1 C2 Fe1 126.2(4) . . . . ? 
C29 Fe1 C2 C3 63.6(4) . . . . ? 
C28 Fe1 C2 C3 98.3(3) . . . . ? 
C4 Fe1 C2 C3 -38.1(3) . . . . ? 
C27 Fe1 C2 C3 140.6(3) . . . . ? 
C5 Fe1 C2 C3 -82.2(3) . . . . ? 
C26 Fe1 C2 C3 171.3(3) . . . . ? 
C1 Fe1 C2 C3 -119.8(4) . . . . ? 
C29 Fe1 C2 C1 -176.6(3) . . . . ? 
C3 Fe1 C2 C1 119.8(4) . . . . ? 
C28 Fe1 C2 C1 -141.8(3) . . . . ? 
C4 Fe1 C2 C1 81.8(3) . . . . ? 
C27 Fe1 C2 C1 -99.6(3) . . . . ? 
C5 Fe1 C2 C1 37.6(2) . . . . ? 
C26 Fe1 C2 C1 -68.9(4) . . . . ? 
C1 C2 C3 C4 -2.4(5) . . . . ? 
Fe1 C2 C3 C4 60.0(3) . . . . ? 
C1 C2 C3 Fe1 -62.4(3) . . . . ? 
C29 Fe1 C3 C4 105.8(3) . . . . ? 
C2 Fe1 C3 C4 -118.4(4) . . . . ? 
C28 Fe1 C3 C4 148.3(3) . . . . ? 
C27 Fe1 C3 C4 -178.2(3) . . . . ? 
C5 Fe1 C3 C4 -38.2(2) . . . . ? 
C25 Fe1 C3 C4 72.3(3) . . . . ? 
C1 Fe1 C3 C4 -81.3(3) . . . . ? 
C29 Fe1 C3 C2 -135.9(3) . . . . ? 
C28 Fe1 C3 C2 -93.4(3) . . . . ? 
C4 Fe1 C3 C2 118.4(4) . . . . ? 
C27 Fe1 C3 C2 -59.8(4) . . . . ? 
C5 Fe1 C3 C2 80.2(3) . . . . ? 
C25 Fe1 C3 C2 -169.3(2) . . . . ? 
C1 Fe1 C3 C2 37.0(2) . . . . ? 
C2 C3 C4 C5 0.7(5) . . . . ? 
Fe1 C3 C4 C5 60.5(3) . . . . ? 
C2 C3 C4 Fe1 -59.8(3) . . . . ? 
C29 Fe1 C4 C3 -89.4(3) . . . . ? 
C2 Fe1 C4 C3 38.3(3) . . . . ? 
C28 Fe1 C4 C3 -49.1(4) . . . . ? 
C5 Fe1 C4 C3 118.4(4) . . . . ? 
C26 Fe1 C4 C3 -173.5(3) . . . . ? 
C25 Fe1 C4 C3 -134.4(3) . . . . ? 
C1 Fe1 C4 C3 81.8(3) . . . . ? 
C29 Fe1 C4 C5 152.2(2) . . . . ? 
C3 Fe1 C4 C5 -118.4(4) . . . . ? 
C2 Fe1 C4 C5 -80.1(3) . . . . ? 
C28 Fe1 C4 C5 -167.5(3) . . . . ? 
C26 Fe1 C4 C5 68.0(4) . . . . ? 
C25 Fe1 C4 C5 107.1(2) . . . . ? 
C1 Fe1 C4 C5 -36.7(2) . . . . ? 
C3 C4 C5 C1 1.2(5) . . . . ? 
Fe1 C4 C5 C1 61.1(3) . . . . ? 
C3 C4 C5 Fe1 -59.9(3) . . . . ? 
C2 C1 C5 C4 -2.6(5) . . . . ? 
B1 C1 C5 C4 174.2(4) . . . . ? 
Fe1 C1 C5 C4 -58.8(3) . . . . ? 
C2 C1 C5 Fe1 56.2(3) . . . . ? 
B1 C1 C5 Fe1 -127.0(4) . . . . ? 
C29 Fe1 C5 C4 -49.7(4) . . . . ? 
C3 Fe1 C5 C4 38.1(3) . . . . ? 
C2 Fe1 C5 C4 82.4(3) . . . . ? 
C27 Fe1 C5 C4 174.1(3) . . . . ? 
C26 Fe1 C5 C4 -141.5(3) . . . . ? 
C25 Fe1 C5 C4 -94.9(3) . . . . ? 
C1 Fe1 C5 C4 120.3(3) . . . . ? 
C29 Fe1 C5 C1 -169.9(3) . . . . ? 
C3 Fe1 C5 C1 -82.2(3) . . . . ? 
C2 Fe1 C5 C1 -37.9(2) . . . . ? 
C4 Fe1 C5 C1 -120.3(3) . . . . ? 
C27 Fe1 C5 C1 53.9(3) . . . . ? 
C26 Fe1 C5 C1 98.3(3) . . . . ? 
C25 Fe1 C5 C1 144.9(2) . . . . ? 
C6 B1 C7 C8 166.5(4) . . . . ? 
C1 B1 C7 C8 -77.7(5) . . . . ? 
C16 B1 C7 C8 51.4(5) . . . . ? 
C6 B1 C7 C12 -14.9(6) . . . . ? 
C1 B1 C7 C12 100.8(4) . . . . ? 
C16 B1 C7 C12 -130.1(4) . . . . ? 
C12 C7 C8 C9 -1.8(5) . . . . ? 
B1 C7 C8 C9 176.8(4) . . . . ? 
C12 C7 C8 C13 177.4(4) . . . . ? 
B1 C7 C8 C13 -4.0(6) . . . . ? 
C7 C8 C9 C10 1.4(6) . . . . ? 
C13 C8 C9 C10 -177.9(4) . . . . ? 
C8 C9 C10 C11 0.1(6) . . . . ? 
C8 C9 C10 C14 -177.6(4) . . . . ? 
C9 C10 C11 C12 -1.0(6) . . . . ? 
C14 C10 C11 C12 176.7(4) . . . . ? 
C10 C11 C12 C7 0.4(6) . . . . ? 
C10 C11 C12 C15 179.1(4) . . . . ? 
C8 C7 C12 C11 1.0(6) . . . . ? 
B1 C7 C12 C11 -177.6(4) . . . . ? 
C8 C7 C12 C15 -177.5(4) . . . . ? 
B1 C7 C12 C15 3.9(6) . . . . ? 
C6 B1 C16 C17 111.1(5) . . . . ? 
C1 B1 C16 C17 0.3(6) . . . . ? 
C7 B1 C16 C17 -124.7(5) . . . . ? 
C6 B1 C16 C21 -69.6(5) . . . . ? 
C1 B1 C16 C21 179.6(4) . . . . ? 
C7 B1 C16 C21 54.6(5) . . . . ? 
C21 C16 C17 C18 -0.7(7) . . . . ? 
B1 C16 C17 C18 178.7(5) . . . . ? 
C21 C16 C17 C22 179.5(5) . . . . ? 
B1 C16 C17 C22 -1.1(7) . . . . ? 
C16 C17 C18 C19 -0.7(9) . . . . ? 
C22 C17 C18 C19 179.1(6) . . . . ? 
C17 C18 C19 C20 1.8(11) . . . . ? 
C17 C18 C19 C23 -178.3(8) . . . . ? 
C18 C19 C20 C21 -1.4(12) . . . . ? 
C23 C19 C20 C21 178.7(8) . . . . ? 
C19 C20 C21 C16 -0.1(11) . . . . ? 
C19 C20 C21 C24 179.4(7) . . . . ? 
C17 C16 C21 C20 1.1(8) . . . . ? 
B1 C16 C21 C20 -178.4(5) . . . . ? 
C17 C16 C21 C24 -178.4(5) . . . . ? 
B1 C16 C21 C24 2.2(7) . . . . ? 
C30 B2 C25 C26 176.6(4) . . . . ? 
C39 B2 C25 C26 -8.2(6) . . . . ? 
C30 B2 C25 C29 -9.7(6) . . . . ? 
C39 B2 C25 C29 165.6(4) . . . . ? 
C30 B2 C25 Fe1 80.2(5) . . . . ? 
C39 B2 C25 Fe1 -104.5(4) . . . . ? 
C29 Fe1 C25 C26 118.5(3) . . . . ? 
C3 Fe1 C25 C26 172.0(3) . . . . ? 
C28 Fe1 C25 C26 80.8(3) . . . . ? 
C4 Fe1 C25 C26 -144.9(2) . . . . ? 
C27 Fe1 C25 C26 37.0(2) . . . . ? 
C5 Fe1 C25 C26 -99.1(3) . . . . ? 
C1 Fe1 C25 C26 -56.7(4) . . . . ? 
C3 Fe1 C25 C29 53.5(4) . . . . ? 
C28 Fe1 C25 C29 -37.7(3) . . . . ? 
C4 Fe1 C25 C29 96.6(3) . . . . ? 
C27 Fe1 C25 C29 -81.5(3) . . . . ? 
C5 Fe1 C25 C29 142.4(3) . . . . ? 
C26 Fe1 C25 C29 -118.5(3) . . . . ? 
C1 Fe1 C25 C29 -175.3(3) . . . . ? 
C29 Fe1 C25 B2 -117.2(5) . . . . ? 
C3 Fe1 C25 B2 -63.8(5) . . . . ? 
C28 Fe1 C25 B2 -154.9(4) . . . . ? 
C4 Fe1 C25 B2 -20.6(4) . . . . ? 
C27 Fe1 C25 B2 161.2(4) . . . . ? 
C5 Fe1 C25 B2 25.2(5) . . . . ? 
C26 Fe1 C25 B2 124.3(5) . . . . ? 
C1 Fe1 C25 B2 67.5(5) . . . . ? 
C29 C25 C26 C27 -2.5(5) . . . . ? 
B2 C25 C26 C27 172.3(4) . . . . ? 
Fe1 C25 C26 C27 -59.1(3) . . . . ? 
C29 C25 C26 Fe1 56.6(3) . . . . ? 
B2 C25 C26 Fe1 -128.6(4) . . . . ? 
C29 Fe1 C26 C27 81.7(3) . . . . ? 
C2 Fe1 C26 C27 -48.6(4) . . . . ? 
C28 Fe1 C26 C27 37.7(3) . . . . ? 
C4 Fe1 C26 C27 -178.7(3) . . . . ? 
C5 Fe1 C26 C27 -135.6(3) . . . . ? 
C25 Fe1 C26 C27 120.0(4) . . . . ? 
C1 Fe1 C26 C27 -90.7(3) . . . . ? 
C29 Fe1 C26 C25 -38.3(2) . . . . ? 
C2 Fe1 C26 C25 -168.6(3) . . . . ? 
C28 Fe1 C26 C25 -82.3(3) . . . . ? 
C4 Fe1 C26 C25 61.3(4) . . . . ? 
C27 Fe1 C26 C25 -120.0(4) . . . . ? 
C5 Fe1 C26 C25 104.3(2) . . . . ? 
C1 Fe1 C26 C25 149.3(2) . . . . ? 
C25 C26 C27 C28 1.2(5) . . . . ? 
Fe1 C26 C27 C28 -59.1(3) . . . . ? 
C25 C26 C27 Fe1 60.3(3) . . . . ? 
C29 Fe1 C27 C26 -81.6(3) . . . . ? 
C3 Fe1 C27 C26 -173.8(3) . . . . ? 
C2 Fe1 C27 C26 149.6(3) . . . . ? 
C28 Fe1 C27 C26 -119.3(4) . . . . ? 
C5 Fe1 C27 C26 73.5(3) . . . . ? 
C25 Fe1 C27 C26 -37.3(2) . . . . ? 
C1 Fe1 C27 C26 107.0(3) . . . . ? 
C29 Fe1 C27 C28 37.7(3) . . . . ? 
C3 Fe1 C27 C28 -54.5(4) . . . . ? 
C2 Fe1 C27 C28 -91.0(3) . . . . ? 
C5 Fe1 C27 C28 -167.1(3) . . . . ? 
C26 Fe1 C27 C28 119.3(4) . . . . ? 
C25 Fe1 C27 C28 82.0(3) . . . . ? 
C1 Fe1 C27 C28 -133.7(3) . . . . ? 
C26 C27 C28 C29 0.6(5) . . . . ? 
Fe1 C27 C28 C29 -59.3(3) . . . . ? 
C26 C27 C28 Fe1 59.9(3) . . . . ? 
C3 Fe1 C28 C29 -97.0(3) . . . . ? 
C2 Fe1 C28 C29 -139.4(3) . . . . ? 
C4 Fe1 C28 C29 -66.2(4) . . . . ? 
C27 Fe1 C28 C29 119.3(4) . . . . ? 
C26 Fe1 C28 C29 81.9(3) . . . . ? 
C25 Fe1 C28 C29 38.0(3) . . . . ? 
C1 Fe1 C28 C29 -172.4(2) . . . . ? 
C29 Fe1 C28 C27 -119.3(4) . . . . ? 
C3 Fe1 C28 C27 143.8(3) . . . . ? 
C2 Fe1 C28 C27 101.4(3) . . . . ? 
C4 Fe1 C28 C27 174.5(3) . . . . ? 
C26 Fe1 C28 C27 -37.4(2) . . . . ? 
C25 Fe1 C28 C27 -81.2(3) . . . . ? 
C1 Fe1 C28 C27 68.3(3) . . . . ? 
C27 C28 C29 C25 -2.2(5) . . . . ? 
Fe1 C28 C29 C25 -61.9(3) . . . . ? 
C27 C28 C29 Fe1 59.7(3) . . . . ? 
C26 C25 C29 C28 2.8(5) . . . . ? 
B2 C25 C29 C28 -172.2(4) . . . . ? 
Fe1 C25 C29 C28 60.4(3) . . . . ? 
C26 C25 C29 Fe1 -57.6(3) . . . . ? 
B2 C25 C29 Fe1 127.4(4) . . . . ? 
C3 Fe1 C29 C28 95.6(3) . . . . ? 
C2 Fe1 C29 C28 57.9(4) . . . . ? 
C4 Fe1 C29 C28 138.4(3) . . . . ? 
C27 Fe1 C29 C28 -37.7(3) . . . . ? 
C5 Fe1 C29 C28 171.0(3) . . . . ? 
C26 Fe1 C29 C28 -81.1(3) . . . . ? 
C25 Fe1 C29 C28 -119.1(4) . . . . ? 
C3 Fe1 C29 C25 -145.3(3) . . . . ? 
C2 Fe1 C29 C25 177.0(2) . . . . ? 
C28 Fe1 C29 C25 119.1(4) . . . . ? 
C4 Fe1 C29 C25 -102.5(3) . . . . ? 
C27 Fe1 C29 C25 81.4(3) . . . . ? 
C5 Fe1 C29 C25 -69.9(4) . . . . ? 
C26 Fe1 C29 C25 38.0(2) . . . . ? 
C25 B2 C30 C35 62.7(5) . . . . ? 
C39 B2 C30 C35 -112.5(4) . . . . ? 
C25 B2 C30 C31 -112.8(4) . . . . ? 
C39 B2 C30 C31 72.0(5) . . . . ? 
C35 C30 C31 C32 0.6(5) . . . . ? 
B2 C30 C31 C32 176.4(4) . . . . ? 
C35 C30 C31 C36 -177.1(3) . . . . ? 
B2 C30 C31 C36 -1.3(5) . . . . ? 
C30 C31 C32 C33 0.6(6) . . . . ? 
C36 C31 C32 C33 178.3(4) . . . . ? 
C31 C32 C33 C34 -1.2(6) . . . . ? 
C31 C32 C33 C37 -179.6(4) . . . . ? 
C32 C33 C34 C35 0.7(6) . . . . ? 
C37 C33 C34 C35 179.0(4) . . . . ? 
C33 C34 C35 C30 0.5(6) . . . . ? 
C33 C34 C35 C38 179.4(4) . . . . ? 
C31 C30 C35 C34 -1.2(5) . . . . ? 
B2 C30 C35 C34 -176.7(4) . . . . ? 
C31 C30 C35 C38 -179.9(3) . . . . ? 
B2 C30 C35 C38 4.5(6) . . . . ? 
C25 B2 C39 C44 66.1(5) . . . . ? 
C30 B2 C39 C44 -118.9(4) . . . . ? 
C25 B2 C39 C40 -110.5(4) . . . . ? 
C30 B2 C39 C40 64.5(5) . . . . ? 
C44 C39 C40 C41 -0.6(6) . . . . ? 
B2 C39 C40 C41 176.3(4) . . . . ? 
C44 C39 C40 C45 -177.3(4) . . . . ? 
B2 C39 C40 C45 -0.5(6) . . . . ? 
C39 C40 C41 C42 0.7(6) . . . . ? 
C45 C40 C41 C42 177.6(4) . . . . ? 
C40 C41 C42 C43 0.4(6) . . . . ? 
C40 C41 C42 C46 -177.3(4) . . . . ? 
C41 C42 C43 C44 -1.6(6) . . . . ? 
C46 C42 C43 C44 176.0(4) . . . . ? 
C42 C43 C44 C39 1.8(6) . . . . ? 
C42 C43 C44 C47 -178.2(4) . . . . ? 
C40 C39 C44 C43 -0.6(6) . . . . ? 
B2 C39 C44 C43 -177.4(4) . . . . ? 
C40 C39 C44 C47 179.3(4) . . . . ? 
B2 C39 C44 C47 2.6(6) . . . . ? 
C6 N1 K1 O4A -26.7(14) . . . . ? 
C6 N1 K1 O3A 37.4(14) . . . . ? 
C6 N1 K1 O1 130.0(13) . . . . ? 
C6 N1 K1 O6 -164.8(13) . . . . ? 
C6 N1 K1 O5A -84.1(14) . . . . ? 
C6 N1 K1 O5 -100.5(14) . . . . ? 
C6 N1 K1 O6A -150.0(14) . . . . ? 
C6 N1 K1 O4 -46.1(14) . . . . ? 
C6 N1 K1 O2 67.6(14) . . . . ? 
C6 N1 K1 O3 9.3(14) . . . . ? 
C6 N1 K1 O1A 155.4(14) . . . . ? 
O4A K1 O1 C101 50.7(12) . . . . ? 
O3A K1 O1 C101 27.9(9) . . . . ? 
O6 K1 O1 C101 157.2(10) . . . . ? 
N1 K1 O1 C101 -76.4(9) . . . . ? 
O5A K1 O1 C101 134.9(9) . . . . ? 
O5 K1 O1 C101 165.5(9) . . . . ? 
O6A K1 O1 C101 174.3(10) . . . . ? 
O4 K1 O1 C101 85.5(14) . . . . ? 
O2 K1 O1 C101 19.3(9) . . . . ? 
O3 K1 O1 C101 41.4(9) . . . . ? 
O1A K1 O1 C101 -134.8(12) . . . . ? 
O4A K1 O1 C112 -89.8(10) . . . . ? 
O3A K1 O1 C112 -112.6(8) . . . . ? 
O6 K1 O1 C112 16.8(8) . . . . ? 
N1 K1 O1 C112 143.2(8) . . . . ? 
O5A K1 O1 C112 -5.5(10) . . . . ? 
O5 K1 O1 C112 25.1(9) . . . . ? 
O6A K1 O1 C112 33.8(8) . . . . ? 
O4 K1 O1 C112 -55.0(15) . . . . ? 
O2 K1 O1 C112 -121.1(9) . . . . ? 
O3 K1 O1 C112 -99.1(8) . . . . ? 
O1A K1 O1 C112 84.8(10) . . . . ? 
C112 O1 C101 C102 89.5(17) . . . . ? 
K1 O1 C101 C102 -48.9(16) . . . . ? 
O1 C101 C102 O2 57.7(19) . . . . ? 
C101 C102 O2 C103 -168.9(11) . . . . ? 
C101 C102 O2 K1 -36.7(16) . . . . ? 
O4A K1 O2 C103 -27.9(7) . . . . ? 
O3A K1 O2 C103 -25.2(7) . . . . ? 
O1 K1 O2 C103 137.2(7) . . . . ? 
O6 K1 O2 C103 98.0(6) . . . . ? 
N1 K1 O2 C103 -123.5(6) . . . . ? 
O5A K1 O2 C103 29.0(7) . . . . ? 
O5 K1 O2 C103 32.4(9) . . . . ? 
O6A K1 O2 C103 104.6(7) . . . . ? 
O4 K1 O2 C103 -30.4(7) . . . . ? 
O3 K1 O2 C103 -18.3(6) . . . . ? 
O1A K1 O2 C103 149.9(7) . . . . ? 
O4A K1 O2 C102 -154.8(9) . . . . ? 
O3A K1 O2 C102 -152.2(11) . . . . ? 
O1 K1 O2 C102 10.3(9) . . . . ? 
O6 K1 O2 C102 -29.0(9) . . . . ? 
N1 K1 O2 C102 109.5(9) . . . . ? 
O5A K1 O2 C102 -98.0(10) . . . . ? 
O5 K1 O2 C102 -94.6(10) . . . . ? 
O6A K1 O2 C102 -22.4(10) . . . . ? 
O4 K1 O2 C102 -157.3(9) . . . . ? 
O3 K1 O2 C102 -145.3(9) . . . . ? 
O1A K1 O2 C102 23.0(9) . . . . ? 
C102 O2 C103 C104 179.4(11) . . . . ? 
K1 O2 C103 C104 49.2(9) . . . . ? 
O2 C103 C104 O3 -61.1(10) . . . . ? 
C103 C104 O3 C105 177.9(7) . . . . ? 
C103 C104 O3 K1 44.9(9) . . . . ? 
O4A K1 O3 C105 15.8(6) . . . . ? 
O3A K1 O3 C105 -141.1(8) . . . . ? 
O1 K1 O3 C105 -171.6(5) . . . . ? 
O6 K1 O3 C105 117.4(5) . . . . ? 
N1 K1 O3 C105 -57.0(5) . . . . ? 
O5A K1 O3 C105 69.1(6) . . . . ? 
O5 K1 O3 C105 54.2(5) . . . . ? 
O6A K1 O3 C105 95.5(6) . . . . ? 
O4 K1 O3 C105 18.5(5) . . . . ? 
O2 K1 O3 C105 -148.5(5) . . . . ? 
O1A K1 O3 C105 -168.4(6) . . . . ? 
O4A K1 O3 C104 149.3(7) . . . . ? 
O3A K1 O3 C104 -7.6(6) . . . . ? 
O1 K1 O3 C104 -38.2(6) . . . . ? 
O6 K1 O3 C104 -109.1(5) . . . . ? 
N1 K1 O3 C104 76.4(5) . . . . ? 
O5A K1 O3 C104 -157.4(6) . . . . ? 
O5 K1 O3 C104 -172.3(6) . . . . ? 
O6A K1 O3 C104 -131.0(6) . . . . ? 
O4 K1 O3 C104 152.0(6) . . . . ? 
O2 K1 O3 C104 -15.0(5) . . . . ? 
O1A K1 O3 C104 -34.9(8) . . . . ? 
C104 O3 C105 C106 170.6(7) . . . . ? 
K1 O3 C105 C106 -53.5(7) . . . . ? 
O3 C105 C106 O4 73.3(9) . . . . ? 
C105 C106 O4 C107 169.4(9) . . . . ? 
C105 C106 O4 K1 -53.7(9) . . . . ? 
O4A K1 O4 C107 159.8(13) . . . . ? 
O3A K1 O4 C107 164.3(8) . . . . ? 
O1 K1 O4 C107 106.2(13) . . . . ? 
O6 K1 O4 C107 40.1(8) . . . . ? 
N1 K1 O4 C107 -91.4(8) . . . . ? 
O5A K1 O4 C107 50.1(9) . . . . ? 
O5 K1 O4 C107 18.1(8) . . . . ? 
O6A K1 O4 C107 20.6(9) . . . . ? 
O2 K1 O4 C107 166.9(8) . . . . ? 
O3 K1 O4 C107 155.0(9) . . . . ? 
O1A K1 O4 C107 -13.9(13) . . . . ? 
O4A K1 O4 C106 23.7(8) . . . . ? 
O3A K1 O4 C106 28.2(6) . . . . ? 
O1 K1 O4 C106 -29.9(14) . . . . ? 
O6 K1 O4 C106 -96.0(6) . . . . ? 
N1 K1 O4 C106 132.5(6) . . . . ? 
O5A K1 O4 C106 -86.0(7) . . . . ? 
O5 K1 O4 C106 -118.0(7) . . . . ? 
O6A K1 O4 C106 -115.6(6) . . . . ? 
O2 K1 O4 C106 30.7(6) . . . . ? 
O3 K1 O4 C106 18.9(5) . . . . ? 
O1A K1 O4 C106 -150.0(9) . . . . ? 
C106 O4 C107 C108 88.6(14) . . . . ? 
K1 O4 C107 C108 -47.2(14) . . . . ? 
O4 C107 C108 O5 55.6(17) . . . . ? 
C107 C108 O5 C109 172.1(18) . . . . ? 
C107 C108 O5 K1 -40.8(17) . . . . ? 
O4A K1 O5 C109 144.1(17) . . . . ? 
O3A K1 O5 C109 111.6(16) . . . . ? 
O1 K1 O5 C109 -8.0(17) . . . . ? 
O6 K1 O5 C109 0.4(16) . . . . ? 
N1 K1 O5 C109 -125.4(16) . . . . ? 
O5A K1 O5 C109 85.5(18) . . . . ? 
O6A K1 O5 C109 -19.6(16) . . . . ? 
O4 K1 O5 C109 157.2(17) . . . . ? 
O2 K1 O5 C109 79.1(17) . . . . ? 
O3 K1 O5 C109 120.6(16) . . . . ? 
O1A K1 O5 C109 -34.7(17) . . . . ? 
O4A K1 O5 C108 0.3(12) . . . . ? 
O3A K1 O5 C108 -32.2(13) . . . . ? 
O1 K1 O5 C108 -151.8(11) . . . . ? 
O6 K1 O5 C108 -143.4(13) . . . . ? 
N1 K1 O5 C108 90.9(12) . . . . ? 
O5A K1 O5 C108 -58.3(12) . . . . ? 
O6A K1 O5 C108 -163.4(14) . . . . ? 
O4 K1 O5 C108 13.4(11) . . . . ? 
O2 K1 O5 C108 -64.6(14) . . . . ? 
O3 K1 O5 C108 -23.2(12) . . . . ? 
O1A K1 O5 C108 -178.5(12) . . . . ? 
C108 O5 C109 C110 172.5(18) . . . . ? 
K1 O5 C109 C110 24(3) . . . . ? 
O5 C109 C110 O6 -50(3) . . . . ? 
C109 C110 O6 C111 -178.4(14) . . . . ? 
C109 C110 O6 K1 51.5(15) . . . . ? 
O4A K1 O6 C110 -67.3(8) . . . . ? 
O3A K1 O6 C110 -145.1(7) . . . . ? 
O1 K1 O6 C110 146.6(8) . . . . ? 
N1 K1 O6 C110 61.0(8) . . . . ? 
O5A K1 O6 C110 -55.3(8) . . . . ? 
O5 K1 O6 C110 -25.4(7) . . . . ? 
O6A K1 O6 C110 19.4(9) . . . . ? 
O4 K1 O6 C110 -46.3(8) . . . . ? 
O2 K1 O6 C110 -174.8(7) . . . . ? 
O3 K1 O6 C110 -112.3(7) . . . . ? 
O1A K1 O6 C110 112.0(8) . . . . ? 
O4A K1 O6 C111 162.9(7) . . . . ? 
O3A K1 O6 C111 85.2(7) . . . . ? 
O1 K1 O6 C111 16.8(7) . . . . ? 
N1 K1 O6 C111 -68.7(7) . . . . ? 
O5A K1 O6 C111 174.9(8) . . . . ? 
O5 K1 O6 C111 -155.2(8) . . . . ? 
O6A K1 O6 C111 -110.3(11) . . . . ? 
O4 K1 O6 C111 -176.1(7) . . . . ? 
O2 K1 O6 C111 55.4(7) . . . . ? 
O3 K1 O6 C111 117.9(7) . . . . ? 
O1A K1 O6 C111 -17.7(7) . . . . ? 
C110 O6 C111 C112 -177.1(11) . . . . ? 
K1 O6 C111 C112 -47.4(11) . . . . ? 
C110 O6 C111 K1 -129.7(11) . . . . ? 
O4A K1 C111 O6 -23.9(10) . . . . ? 
O3A K1 C111 O6 -107.9(7) . . . . ? 
O1 K1 C111 O6 -157.6(9) . . . . ? 
N1 K1 C111 O6 123.9(7) . . . . ? 
O5A K1 C111 O6 -4.5(7) . . . . ? 
O5 K1 C111 O6 21.8(7) . . . . ? 
O6A K1 C111 O6 36.2(7) . . . . ? 
O4 K1 C111 O6 5.1(9) . . . . ? 
O2 K1 C111 O6 -128.9(7) . . . . ? 
O3 K1 C111 O6 -77.1(7) . . . . ? 
O1A K1 C111 O6 154.3(10) . . . . ? 
O4A K1 C111 C112 110.3(9) . . . . ? 
O3A K1 C111 C112 26.3(9) . . . . ? 
O1 K1 C111 C112 -23.3(7) . . . . ? 
O6 K1 C111 C112 134.2(12) . . . . ? 
N1 K1 C111 C112 -101.9(8) . . . . ? 
O5A K1 C111 C112 129.7(9) . . . . ? 
O5 K1 C111 C112 156.0(8) . . . . ? 
O6A K1 C111 C112 170.4(11) . . . . ? 
O4 K1 C111 C112 139.3(7) . . . . ? 
O2 K1 C111 C112 5.4(8) . . . . ? 
O3 K1 C111 C112 57.2(9) . . . . ? 
O1A K1 C111 C112 -71.4(9) . . . . ? 
C101 O1 C112 C111 171.5(11) . . . . ? 
K1 O1 C112 C111 -48.8(13) . . . . ? 
O6 C111 C112 O1 65.5(15) . . . . ? 
K1 C111 C112 O1 33.0(10) . . . . ? 
O3A K1 O1A C201 -24.8(13) . . . . ? 
O1 K1 O1A C201 -5.1(10) . . . . ? 
O6 K1 O1A C201 88.6(13) . . . . ? 
N1 K1 O1A C201 -129.1(12) . . . . ? 
O5A K1 O1A C201 101.0(13) . . . . ? 
O5 K1 O1A C201 126.0(12) . . . . ? 
O6A K1 O1A C201 113.1(13) . . . . ? 
O4 K1 O1A C201 153.1(10) . . . . ? 
O2 K1 O1A C201 -27.5(12) . . . . ? 
O3 K1 O1A C201 -11.0(15) . . . . ? 
O3A K1 O1A C212 -154.9(16) . . . . ? 
O1 K1 O1A C212 -135.2(19) . . . . ? 
O6 K1 O1A C212 -41.5(16) . . . . ? 
N1 K1 O1A C212 100.8(17) . . . . ? 
O5A K1 O1A C212 -29.1(18) . . . . ? 
O5 K1 O1A C212 -4.1(17) . . . . ? 
O6A K1 O1A C212 -17.0(16) . . . . ? 
O4 K1 O1A C212 23(2) . . . . ? 
O2 K1 O1A C212 -157.6(17) . . . . ? 
O3 K1 O1A C212 -141.1(16) . . . . ? 
C212 O1A C201 C202 179.1(16) . . . . ? 
K1 O1A C201 C202 48.3(17) . . . . ? 
O1A C201 C202 O2A -73.9(19) . . . . ? 
C201 C202 O2A C203 176.2(19) . . . . ? 
C201 C202 O2A K1 61.6(17) . . . . ? 
O4A K1 O2A C203 42.0(13) . . . . ? 
O3A K1 O2A C203 29.5(12) . . . . ? 
O1 K1 O2A C203 -152.0(16) . . . . ? 
O6 K1 O2A C203 165.3(13) . . . . ? 
N1 K1 O2A C203 -66.9(13) . . . . ? 
O5A K1 O2A C203 118.1(12) . . . . ? 
O5 K1 O2A C203 146.9(12) . . . . ? 
O6A K1 O2A C203 176.2(12) . . . . ? 
O4 K1 O2A C203 46.2(14) . . . . ? 
O2 K1 O2A C203 16.2(11) . . . . ? 
O3 K1 O2A C203 41.6(12) . . . . ? 
O1A K1 O2A C203 -141.0(14) . . . . ? 
O4A K1 O2A C202 159.3(10) . . . . ? 
O3A K1 O2A C202 146.8(11) . . . . ? 
O1 K1 O2A C202 -34.6(10) . . . . ? 
O6 K1 O2A C202 -77.3(10) . . . . ? 
N1 K1 O2A C202 50.5(11) . . . . ? 
O5A K1 O2A C202 -124.6(11) . . . . ? 
O5 K1 O2A C202 -95.7(11) . . . . ? 
O6A K1 O2A C202 -66.4(11) . . . . ? 
O4 K1 O2A C202 163.6(9) . . . . ? 
O2 K1 O2A C202 133.6(13) . . . . ? 
O3 K1 O2A C202 159.0(10) . . . . ? 
O1A K1 O2A C202 -23.7(10) . . . . ? 
C202 O2A C203 C204 -177.3(18) . . . . ? 
K1 O2A C203 C204 -60(2) . . . . ? 
O2A C203 C204 O3A 68(2) . . . . ? 
C203 C204 O3A C205 165.9(15) . . . . ? 
C203 C204 O3A K1 -36.2(18) . . . . ? 
O4A K1 O3A C205 -7.3(9) . . . . ? 
O1 K1 O3A C205 160.4(10) . . . . ? 
O6 K1 O3A C205 105.1(9) . . . . ? 
N1 K1 O3A C205 -95.8(9) . . . . ? 
O5A K1 O3A C205 39.3(10) . . . . ? 
O5 K1 O3A C205 27.7(11) . . . . ? 
O6A K1 O3A C205 95.9(10) . . . . ? 
O4 K1 O3A C205 -9.0(9) . . . . ? 
O2 K1 O3A C205 175.7(12) . . . . ? 
O3 K1 O3A C205 8.3(8) . . . . ? 
O1A K1 O3A C205 170.2(9) . . . . ? 
O4A K1 O3A C204 -164.3(12) . . . . ? 
O1 K1 O3A C204 3.4(11) . . . . ? 
O6 K1 O3A C204 -51.9(11) . . . . ? 
N1 K1 O3A C204 107.2(11) . . . . ? 
O5A K1 O3A C204 -117.7(11) . . . . ? 
O5 K1 O3A C204 -129.3(11) . . . . ? 
O6A K1 O3A C204 -61.1(12) . . . . ? 
O4 K1 O3A C204 -166.0(11) . . . . ? 
O2 K1 O3A C204 18.7(10) . . . . ? 
O3 K1 O3A C204 -148.7(13) . . . . ? 
O1A K1 O3A C204 13.2(12) . . . . ? 
C204 O3A C205 C206 168(2) . . . . ? 
K1 O3A C205 C206 11(2) . . . . ? 
O3A C205 C206 O4A -10(5) . . . . ? 
O3A C205 C206 K1 -7.2(16) . . . . ? 
O3A K1 C206 O4A -177(3) . . . . ? 
O1 K1 C206 O4A 165.0(15) . . . . ? 
O6 K1 C206 O4A 82(2) . . . . ? 
N1 K1 C206 O4A -77(2) . . . . ? 
O5A K1 C206 O4A 48.3(19) . . . . ? 
O5 K1 C206 O4A 28(2) . . . . ? 
O6A K1 C206 O4A 55(2) . . . . ? 
O4 K1 C206 O4A -1.6(13) . . . . ? 
O2 K1 C206 O4A -176(2) . . . . ? 
O3 K1 C206 O4A 160(4) . . . . ? 
O1A K1 C206 O4A 173.1(12) . . . . ? 
O4A K1 C206 C205 -177(4) . . . . ? 
O3A K1 C206 C205 5.4(12) . . . . ? 
O1 K1 C206 C205 -12(2) . . . . ? 
O6 K1 C206 C205 -95.8(17) . . . . ? 
N1 K1 C206 C205 105.2(18) . . . . ? 
O5A K1 C206 C205 -129(2) . . . . ? 
O5 K1 C206 C205 -149.0(18) . . . . ? 
O6A K1 C206 C205 -122.5(15) . . . . ? 
O4 K1 C206 C205 -179(3) . . . . ? 
O2 K1 C206 C205 6.3(16) . . . . ? 
O3 K1 C206 C205 -17.4(9) . . . . ? 
O1A K1 C206 C205 -4(4) . . . . ? 
C205 C206 O4A C207 -122(4) . . . . ? 
K1 C206 O4A C207 -126.0(16) . . . . ? 
C205 C206 O4A K1 4(5) . . . . ? 
O3A K1 O4A C206 2(2) . . . . ? 
O1 K1 O4A C206 -24(2) . . . . ? 
O6 K1 O4A C206 -113(2) . . . . ? 
N1 K1 O4A C206 105(2) . . . . ? 
O5A K1 O4A C206 -125(2) . . . . ? 
O5 K1 O4A C206 -150(2) . . . . ? 
O6A K1 O4A C206 -137(2) . . . . ? 
O4 K1 O4A C206 177(2) . . . . ? 
O2 K1 O4A C206 4(2) . . . . ? 
O3 K1 O4A C206 -10(2) . . . . ? 
O3A K1 O4A C207 116.3(13) . . . . ? 
O1 K1 O4A C207 90.7(14) . . . . ? 
O6 K1 O4A C207 1.4(14) . . . . ? 
N1 K1 O4A C207 -140.4(12) . . . . ? 
O5A K1 O4A C207 -10.7(12) . . . . ? 
O5 K1 O4A C207 -36.0(13) . . . . ? 
O6A K1 O4A C207 -22.5(14) . . . . ? 
O4 K1 O4A C207 -68.7(13) . . . . ? 
O2 K1 O4A C207 117.8(13) . . . . ? 
O3 K1 O4A C207 104.7(14) . . . . ? 
C206 O4A C207 C208 164.9(19) . . . . ? 
K1 O4A C207 C208 43(2) . . . . ? 
O4A C207 C208 O5A -65(2) . . . . ? 
O4A C207 C208 K1 -27.4(13) . . . . ? 
O4A K1 C208 O5A 148.4(14) . . . . ? 
O3A K1 C208 O5A 113.1(11) . . . . ? 
O1 K1 C208 O5A 15.5(14) . . . . ? 
O6 K1 C208 O5A -10.2(11) . . . . ? 
N1 K1 C208 O5A -139.0(11) . . . . ? 
O5 K1 C208 O5A -52.9(11) . . . . ? 
O6A K1 C208 O5A -30.3(11) . . . . ? 
O4 K1 C208 O5A 178.3(15) . . . . ? 
O2 K1 C208 O5A 100.2(11) . . . . ? 
O3 K1 C208 O5A 117.7(12) . . . . ? 
O1A K1 C208 O5A -30.7(14) . . . . ? 
O4A K1 C208 C207 20.4(10) . . . . ? 
O3A K1 C208 C207 -14.8(12) . . . . ? 
O1 K1 C208 C207 -112.5(11) . . . . ? 
O6 K1 C208 C207 -138.2(12) . . . . ? 
N1 K1 C208 C207 93.1(12) . . . . ? 
O5A K1 C208 C207 -128.0(18) . . . . ? 
O5 K1 C208 C207 179.1(15) . . . . ? 
O6A K1 C208 C207 -158.2(12) . . . . ? 
O4 K1 C208 C207 50.3(11) . . . . ? 
O2 K1 C208 C207 -27.8(13) . . . . ? 
O3 K1 C208 C207 -10.2(11) . . . . ? 
O1A K1 C208 C207 -158.6(11) . . . . ? 
C207 C208 O5A C209 -164.3(16) . . . . ? 
K1 C208 O5A C209 142(2) . . . . ? 
C207 C208 O5A K1 53.7(16) . . . . ? 
O4A K1 O5A C209 -165.5(14) . . . . ? 
O3A K1 O5A C209 146.6(12) . . . . ? 
O1 K1 O5A C209 48.5(14) . . . . ? 
O6 K1 O5A C209 26.1(11) . . . . ? 
N1 K1 O5A C209 -92.3(12) . . . . ? 
O5 K1 O5A C209 -54.1(11) . . . . ? 
O6A K1 O5A C209 2.3(11) . . . . ? 
O4 K1 O5A C209 -143.5(14) . . . . ? 
O2 K1 O5A C209 122.1(12) . . . . ? 
O3 K1 O5A C209 160.4(13) . . . . ? 
O1A K1 O5A C209 14.5(14) . . . . ? 
O4A K1 O5A C208 -23.2(10) . . . . ? 
O3A K1 O5A C208 -71.0(12) . . . . ? 
O1 K1 O5A C208 -169.1(10) . . . . ? 
O6 K1 O5A C208 168.5(13) . . . . ? 
N1 K1 O5A C208 50.0(12) . . . . ? 
O5 K1 O5A C208 88.3(14) . . . . ? 
O6A K1 O5A C208 144.7(13) . . . . ? 
O4 K1 O5A C208 -1.1(10) . . . . ? 
O2 K1 O5A C208 -95.5(12) . . . . ? 
O3 K1 O5A C208 -57.2(11) . . . . ? 
O1A K1 O5A C208 156.9(11) . . . . ? 
C208 O5A C209 C210 -170.1(16) . . . . ? 
K1 O5A C209 C210 -31.2(19) . . . . ? 
O5A C209 C210 O6A 56(2) . . . . ? 
C209 C210 O6A C211 172.6(15) . . . . ? 
C209 C210 O6A K1 -52.1(17) . . . . ? 
O4A K1 O6A C210 39.1(12) . . . . ? 
O3A K1 O6A C210 -44.4(13) . . . . ? 
O1 K1 O6A C210 -113.1(11) . . . . ? 
O6 K1 O6A C210 -66.4(12) . . . . ? 
N1 K1 O6A C210 147.8(10) . . . . ? 
O5A K1 O6A C210 26.9(11) . . . . ? 
O5 K1 O6A C210 56.9(11) . . . . ? 
O4 K1 O6A C210 54.1(11) . . . . ? 
O2 K1 O6A C210 -84.0(11) . . . . ? 
O3 K1 O6A C210 -4.3(13) . . . . ? 
O1A K1 O6A C210 -140.2(12) . . . . ? 
O4A K1 O6A C211 168.5(12) . . . . ? 
O3A K1 O6A C211 85.0(13) . . . . ? 
O1 K1 O6A C211 16.4(12) . . . . ? 
O6 K1 O6A C211 63.1(13) . . . . ? 
N1 K1 O6A C211 -82.8(13) . . . . ? 
O5A K1 O6A C211 156.3(14) . . . . ? 
O5 K1 O6A C211 -173.7(14) . . . . ? 
O4 K1 O6A C211 -176.4(12) . . . . ? 
O2 K1 O6A C211 45.4(13) . . . . ? 
O3 K1 O6A C211 125.2(11) . . . . ? 
O1A K1 O6A C211 -10.8(12) . . . . ? 
C210 O6A C211 C212 169.3(19) . . . . ? 
K1 O6A C211 C212 37(2) . . . . ? 
C201 O1A C212 C211 -87(3) . . . . ? 
K1 O1A C212 C211 47(3) . . . . ? 
O6A C211 C212 O1A -57(3) . . . . ? 
Cl5S C2S Cl6S Cl4S 139(3) . . . 3_766 ? 
Cl4S C2S Cl6S Cl4S -95(3) . . . 3_766 ? 
Cl6S C2S Cl4S Cl6S 114(2) . . . 3_766 ? 
Cl5S C2S Cl4S Cl6S -113(2) . . . 3_766 ? 
Cl6S C2S Cl4S C2S 54(2) . . . 3_766 ? 
Cl5S C2S Cl4S C2S -174(4) . . . 3_766 ? 
C5S O1S C4S C3S 129(3) . . . . ? 
C4S O1S C5S C6S 137(3) . . . . ? 
 
_diffrn_measured_fraction_theta_max    0.991 
_diffrn_reflns_theta_full              27.48 
_diffrn_measured_fraction_theta_full   0.991 
_refine_diff_density_max    1.520 
_refine_diff_density_min   -1.117 
_refine_diff_density_rms    0.097 

# start Validation Reply Form
_vrf_PLAT201_1a.CN
;
PROBLEM: Isotropic non-H Atoms in Main Residue       18 
RESPONSE: This arises from the disordered 18-crown-6 group.
No attempt is made to discuss structural metrics in the text
;

_vrf_PLAT220_1a.CN
;
PROBLEM:  Large Non-Solvent    C     Ueq(max)/Ueq(min) ...        7.8 Ratio 
RESPONSE: This arises from the disordered 18-crown-6 group.
No attempt is made to discuss structural metrics in the text
;

_vrf_PLAT411_1a.CN
;
PROBLEM:  Short Inter H Contact H3  H1SA  1.94 Ang 
RESPONSE: This arises between one component of the disordered Et2O and a Fc H.
;
# end Validation Reply Form


data_1a.2CN
 
_audit_creation_method            SHELXL-97 
_chemical_name_systematic 
; 
 . 
; 
_chemical_name_common             . 
_chemical_melting_point           'not measured' 
_chemical_formula_moiety          'C72 H100 B2 Fe K2 N2 O12, C4 H10 O'
_chemical_formula_sum 
 'C76 H110 B2 Fe K2 N2 O13' 
_chemical_formula_weight          1415.33 
 
loop_ 
 _atom_type_symbol 
 _atom_type_description 
 _atom_type_scat_dispersion_real 
 _atom_type_scat_dispersion_imag 
 _atom_type_scat_source 
 'C'  'C'   0.0033   0.0016 
 'International Tables Vol C Tables 4.2.6.8 and 6.1.1.4' 
 'H'  'H'   0.0000   0.0000 
 'International Tables Vol C Tables 4.2.6.8 and 6.1.1.4' 
 'B'  'B'   0.0013   0.0007 
 'International Tables Vol C Tables 4.2.6.8 and 6.1.1.4' 
 'N'  'N'   0.0061   0.0033 
 'International Tables Vol C Tables 4.2.6.8 and 6.1.1.4' 
 'O'  'O'   0.0106   0.0060 
 'International Tables Vol C Tables 4.2.6.8 and 6.1.1.4' 
 'K'  'K'   0.2009   0.2494 
 'International Tables Vol C Tables 4.2.6.8 and 6.1.1.4' 
 'Fe'  'Fe'   0.3463   0.8444 
 'International Tables Vol C Tables 4.2.6.8 and 6.1.1.4' 
 
_symmetry_cell_setting            Monoclinic 
_symmetry_space_group_name_H-M    C2/c
_symmetry_space_group_name_Hall   '-C 2yc'
 
loop_ 
 _symmetry_equiv_pos_as_xyz 
 'x, y, z' 
 '-x, y, -z+1/2' 
 'x+1/2, y+1/2, z' 
 '-x+1/2, y+1/2, -z+1/2' 
 '-x, -y, -z' 
 'x, -y, z-1/2' 
 '-x+1/2, -y+1/2, -z' 
 'x+1/2, -y+1/2, z-1/2' 
 
_cell_length_a                    23.3200(4) 
_cell_length_b                    16.0340(3) 
_cell_length_c                    22.3901(4) 
_cell_angle_alpha                 90.00 
_cell_angle_beta                  113.4784(9) 
_cell_angle_gamma                 90.00 
_cell_volume                      7678.8(2) 
_cell_formula_units_Z             4 
_cell_measurement_temperature     150(2) 
_cell_measurement_reflns_used     8782
_cell_measurement_theta_min       5.097
_cell_measurement_theta_max       27.485
 
_exptl_crystal_description        'block' 
_exptl_crystal_colour             'clear_intense_orange'
_exptl_crystal_size_max           0.20 
_exptl_crystal_size_mid           0.20 
_exptl_crystal_size_min           0.10 
_exptl_crystal_density_meas       'not measured' 
_exptl_crystal_density_diffrn     1.224 
_exptl_crystal_density_method     'not measured' 
_exptl_crystal_F_000              3032 
_exptl_absorpt_coefficient_mu     0.365 
_exptl_absorpt_correction_type    multi-scan
_exptl_absorpt_correction_T_min   0.9306 
_exptl_absorpt_correction_T_max   0.9644 
_exptl_absorpt_process_details   
'DENZO/SCALEPACK (Otwinowski & Minor, 1997)'
 
_exptl_special_details 
; 
The data collection was carried out by a 
combination of \w scans.
; 
 
_diffrn_ambient_temperature       150(2) 
_diffrn_radiation_wavelength      0.71073 
_diffrn_radiation_type            MoK\a 
_diffrn_radiation_source          'fine-focus sealed tube'
_diffrn_radiation_monochromator   graphite 
_diffrn_measurement_device_type   'KappaCCD'
_diffrn_measurement_method        'CCD' 
_diffrn_detector_area_resol_mean  9 
_diffrn_standards_number          . 
_diffrn_standards_interval_count  . 
_diffrn_standards_interval_time   . 
_diffrn_standards_decay_%         . 
_diffrn_reflns_number             16489 
_diffrn_reflns_av_R_equivalents   0.0343 
_diffrn_reflns_av_sigmaI/netI     0.0509 
_diffrn_reflns_limit_h_min        -30 
_diffrn_reflns_limit_h_max        30 
_diffrn_reflns_limit_k_min        -20 
_diffrn_reflns_limit_k_max        20 
_diffrn_reflns_limit_l_min        -29 
_diffrn_reflns_limit_l_max        28 
_diffrn_reflns_theta_min          5.10 
_diffrn_reflns_theta_max          27.43 
_reflns_number_total              8649 
_reflns_number_gt                 6831 
_reflns_threshold_expression      >2sigma(I) 
 
_computing_data_collection        'Collect (Nonius BV, 1997-2000)' 
_computing_cell_refinement        'HKL Scalepack (Otwinowski & Minor 1997)' 
_computing_data_reduction 
 'HKL Denzo and Scalepack (Otwinowski & Minor 1997)' 
_computing_structure_solution     'SHELXS-97 (Sheldrick, 1997)' 
_computing_structure_refinement   'SHELXL-97 (Sheldrick, 1997)' 
_computing_molecular_graphics     'Bruker SHELXTL' 
_computing_publication_material   'Bruker SHELXTL'
 
_refine_special_details 
; 
 Refinement of F^2^ against ALL reflections.  The weighted R-factor wR and 
 goodness of fit S are based on F^2^, conventional R-factors R are based 
 on F, with F set to zero for negative F^2^. The threshold expression of 
 F^2^ > 2sigma(F^2^) is used only for calculating R-factors(gt) etc. and is 
 not relevant to the choice of reflections for refinement.  R-factors based 
 on F^2^ are statistically about twice as large as those based on F, and R- 
 factors based on ALL data will be even larger. 

 The crystals were weak and the structure suffered from extensive disorder
 which meant that vibrational, thermal similarity and same distance 
 restraints were required for the crown ether and diethyl ether.  In 
 addition there was some other unidentified problem which ultimately gave
 rise to the large R-indices, however, despite this, the there seems to be
 no reason to doubt the connectivity.
; 
 
_refine_ls_structure_factor_coef  Fsqd  
_refine_ls_matrix_type            full 
_refine_ls_weighting_scheme       calc  
_refine_ls_weighting_details 
 'calc w=1/[\s^2^(Fo^2^)+(0.0000P)^2^+155.0272P] where P=(Fo^2^+2Fc^2^)/3' 
_atom_sites_solution_primary      direct 
_atom_sites_solution_secondary    difmap 
_atom_sites_solution_hydrogens    geom 
_refine_ls_hydrogen_treatment     constr 
_refine_ls_extinction_method      SHELXL 
_refine_ls_extinction_coef        0.0029(3) 
_refine_ls_extinction_expression 
 'Fc^*^=kFc[1+0.001xFc^2^\l^3^/sin(2\q)]^-1/4^' 
_refine_ls_number_reflns          8649 
_refine_ls_number_parameters      629 
_refine_ls_number_restraints      1141 
_refine_ls_R_factor_all           0.1618 
_refine_ls_R_factor_gt            0.1400 
_refine_ls_wR_factor_ref          0.3200 
_refine_ls_wR_factor_gt           0.3115 
_refine_ls_goodness_of_fit_ref    1.200 
_refine_ls_restrained_S_all       1.298 
_refine_ls_shift/su_max           0.000 
_refine_ls_shift/su_mean          0.000 
 
loop_ 
 _atom_site_label 
 _atom_site_type_symbol 
 _atom_site_fract_x 
 _atom_site_fract_y 
 _atom_site_fract_z 
 _atom_site_U_iso_or_equiv 
 _atom_site_adp_type 
 _atom_site_occupancy 
 _atom_site_symmetry_multiplicity 
 _atom_site_calc_flag 
 _atom_site_refinement_flags 
 _atom_site_disorder_assembly 
 _atom_site_disorder_group 
Fe1 Fe 0.2500 0.2500 0.5000 0.0272(4) Uani 1 2 d S . . 
K1 K 0.44800(8) 0.25519(12) 0.43507(10) 0.0520(6) Uani 1 1 d D . . 
N1 N 0.3696(3) 0.1239(5) 0.4321(3) 0.0408(16) Uani 1 1 d . B . 
C1 C 0.2272(3) 0.2168(4) 0.4016(3) 0.0245(13) Uani 1 1 d . . . 
C2 C 0.1728(3) 0.2346(4) 0.4147(3) 0.0284(14) Uani 1 1 d . . . 
H2A H 0.1381 0.1961 0.4079 0.034 Uiso 1 1 calc R . . 
C3 C 0.1774(3) 0.3193(5) 0.4385(3) 0.0296(15) Uani 1 1 d . . . 
H3A H 0.1462 0.3485 0.4498 0.035 Uiso 1 1 calc R . . 
C4 C 0.2354(3) 0.3531(4) 0.4419(3) 0.0296(15) Uani 1 1 d . . . 
H4A H 0.2513 0.4094 0.4560 0.036 Uiso 1 1 calc R . . 
C5 C 0.2660(3) 0.2890(4) 0.4211(3) 0.0285(15) Uani 1 1 d . . . 
H5A H 0.3073 0.2943 0.4198 0.034 Uiso 1 1 calc R . . 
C6 C 0.3156(3) 0.1217(5) 0.4070(4) 0.0312(15) Uani 1 1 d . . . 
C16 C 0.2365(3) 0.1441(5) 0.2912(4) 0.0310(15) Uani 1 1 d . . . 
C21 C 0.2149(4) 0.2153(5) 0.2508(4) 0.0357(17) Uani 1 1 d . A 1 
C20 C 0.2159(4) 0.2172(6) 0.1889(4) 0.048(2) Uani 1 1 d . A 1 
H20A H 0.2019 0.2651 0.1639 0.058 Uiso 1 1 calc R A 1 
C19 C 0.2363(4) 0.1527(7) 0.1631(4) 0.053(2) Uani 1 1 d . . . 
C18 C 0.2569(4) 0.0822(7) 0.2012(5) 0.052(2) Uani 1 1 d . A . 
H18A H 0.2706 0.0367 0.1847 0.062 Uiso 1 1 calc R . . 
C17 C 0.2575(3) 0.0772(5) 0.2635(4) 0.0385(18) Uani 1 1 d . A . 
C24 C 0.1899(4) 0.2935(5) 0.2712(4) 0.043(2) Uani 1 1 d . A 1 
H24A H 0.1664 0.3259 0.2333 0.065 Uiso 1 1 calc R A 1 
H24B H 0.2243 0.3260 0.3002 0.065 Uiso 1 1 calc R A 1 
H24C H 0.1634 0.2777 0.2929 0.065 Uiso 1 1 calc R A 1 
C23 C 0.2376(7) 0.1563(10) 0.0960(5) 0.092(5) Uani 1 1 d . A 1 
H23A H 0.2338 0.1009 0.0786 0.138 Uiso 1 1 calc R A 1 
H23B H 0.2763 0.1805 0.0991 0.138 Uiso 1 1 calc R A 1 
H23C H 0.2033 0.1898 0.0679 0.138 Uiso 1 1 calc R A 1 
C22 C 0.2829(5) -0.0031(6) 0.2990(5) 0.051(2) Uani 1 1 d . A 1 
H22A H 0.2858 -0.0438 0.2688 0.077 Uiso 1 1 calc R A 1 
H22B H 0.2554 -0.0233 0.3182 0.077 Uiso 1 1 calc R A 1 
H22C H 0.3236 0.0065 0.3325 0.077 Uiso 1 1 calc R A 1 
C7 C 0.1969(3) 0.0542(4) 0.3731(3) 0.0293(15) Uani 1 1 d . . . 
C8 C 0.2177(4) -0.0142(5) 0.4180(4) 0.0385(18) Uani 1 1 d . A . 
C9 C 0.1774(5) -0.0765(5) 0.4194(4) 0.047(2) Uani 1 1 d . . . 
H9A H 0.1933 -0.1196 0.4493 0.057 Uiso 1 1 calc R A . 
C10 C 0.1149(5) -0.0781(5) 0.3790(4) 0.045(2) Uani 1 1 d . A . 
C11 C 0.0934(4) -0.0143(5) 0.3342(4) 0.0415(19) Uani 1 1 d . . . 
H11A H 0.0517 -0.0141 0.3051 0.050 Uiso 1 1 calc R A . 
C12 C 0.1328(3) 0.0504(5) 0.3313(3) 0.0309(15) Uani 1 1 d . A . 
C13 C 0.2853(5) -0.0232(6) 0.4648(4) 0.050(2) Uani 1 1 d . . . 
H13A H 0.2888 -0.0671 0.4952 0.075 Uiso 1 1 calc R A . 
H13B H 0.2995 0.0282 0.4880 0.075 Uiso 1 1 calc R . . 
H13C H 0.3104 -0.0365 0.4410 0.075 Uiso 1 1 calc R . . 
C14 C 0.0708(6) -0.1471(7) 0.3830(6) 0.073(3) Uani 1 1 d . . . 
H14A H 0.0912 -0.1785 0.4223 0.110 Uiso 1 1 calc R A . 
H14B H 0.0605 -0.1835 0.3461 0.110 Uiso 1 1 calc R . . 
H14C H 0.0333 -0.1224 0.3830 0.110 Uiso 1 1 calc R . . 
C15 C 0.1020(4) 0.1157(5) 0.2793(4) 0.0393(18) Uani 1 1 d . . . 
H15A H 0.0576 0.1068 0.2604 0.059 Uiso 1 1 calc R A . 
H15B H 0.1181 0.1114 0.2461 0.059 Uiso 1 1 calc R . . 
H15C H 0.1108 0.1702 0.2985 0.059 Uiso 1 1 calc R . . 
B1 B 0.2415(4) 0.1326(5) 0.3686(4) 0.0277(16) Uani 1 1 d . A . 
O1 O 0.4451(6) 0.2003(7) 0.3170(5) 0.047(3) Uani 0.551(9) 1 d PDU B 1 
C25 C 0.3904(11) 0.2260(11) 0.2624(7) 0.085(8) Uani 0.551(9) 1 d PDU B 1 
H25A H 0.3543 0.1954 0.2619 0.102 Uiso 0.551(9) 1 calc PR B 1 
H25B H 0.3955 0.2142 0.2223 0.102 Uiso 0.551(9) 1 calc PR B 1 
C26 C 0.3804(9) 0.3184(9) 0.2673(6) 0.058(4) Uani 0.551(9) 1 d PDU B 1 
H26A H 0.4135 0.3482 0.2604 0.069 Uiso 0.551(9) 1 calc PR B 1 
H26B H 0.3411 0.3338 0.2325 0.069 Uiso 0.551(9) 1 calc PR B 1 
O2 O 0.3794(5) 0.3450(6) 0.3266(4) 0.046(3) Uani 0.551(9) 1 d PDU B 1 
C27 C 0.3763(12) 0.4326(8) 0.3305(8) 0.054(5) Uani 0.551(9) 1 d PDU B 1 
H27A H 0.3400 0.4532 0.2940 0.065 Uiso 0.551(9) 1 calc PR B 1 
H27B H 0.4133 0.4574 0.3281 0.065 Uiso 0.551(9) 1 calc PR B 1 
C28 C 0.3720(7) 0.4573(9) 0.3923(7) 0.059(4) Uani 0.551(9) 1 d PDU B 1 
H28A H 0.3733 0.5176 0.3958 0.071 Uiso 0.551(9) 1 calc PR B 1 
H28B H 0.3322 0.4386 0.3919 0.071 Uiso 0.551(9) 1 calc PR B 1 
O3 O 0.4214(5) 0.4228(6) 0.4475(5) 0.050(3) Uani 0.551(9) 1 d PDU B 1 
C29 C 0.4128(11) 0.4407(12) 0.5051(7) 0.063(6) Uani 0.551(9) 1 d PDU B 1 
H29A H 0.3760 0.4123 0.5049 0.075 Uiso 0.551(9) 1 calc PR B 1 
H29B H 0.4075 0.5002 0.5088 0.075 Uiso 0.551(9) 1 calc PR B 1 
C30 C 0.4701(8) 0.4107(8) 0.5606(7) 0.065(4) Uani 0.551(9) 1 d PDU B 1 
H30A H 0.5072 0.4331 0.5570 0.078 Uiso 0.551(9) 1 calc PR B 1 
H30B H 0.4695 0.4294 0.6016 0.078 Uiso 0.551(9) 1 calc PR B 1 
O4 O 0.4711(5) 0.3233(7) 0.5588(5) 0.056(3) Uani 0.551(9) 1 d PDU B 1 
C31 C 0.5189(10) 0.2873(12) 0.6119(6) 0.081(6) Uani 0.551(9) 1 d PDU B 1 
H31A H 0.5120 0.2991 0.6510 0.097 Uiso 0.551(9) 1 calc PR B 1 
H31B H 0.5584 0.3126 0.6170 0.097 Uiso 0.551(9) 1 calc PR B 1 
C32 C 0.5234(10) 0.1954(11) 0.6053(6) 0.088(6) Uani 0.551(9) 1 d PDU B 1 
H32A H 0.5547 0.1716 0.6446 0.106 Uiso 0.551(9) 1 calc PR B 1 
H32B H 0.4835 0.1688 0.5966 0.106 Uiso 0.551(9) 1 calc PR B 1 
O5 O 0.5408(7) 0.1857(9) 0.5518(5) 0.080(5) Uani 0.551(9) 1 d PDU B 1 
C33 C 0.5527(12) 0.1011(12) 0.5434(9) 0.082(6) Uani 0.551(9) 1 d PDU B 1 
H33A H 0.5164 0.0677 0.5385 0.099 Uiso 0.551(9) 1 calc PR B 1 
H33B H 0.5878 0.0814 0.5814 0.099 Uiso 0.551(9) 1 calc PR B 1 
C34 C 0.5668(8) 0.0919(13) 0.4846(8) 0.078(6) Uani 0.551(9) 1 d PDU B 1 
H34A H 0.5999 0.1299 0.4866 0.094 Uiso 0.551(9) 1 calc PR B 1 
H34B H 0.5801 0.0353 0.4813 0.094 Uiso 0.551(9) 1 calc PR B 1 
O6 O 0.5117(5) 0.1105(8) 0.4315(5) 0.064(4) Uani 0.551(9) 1 d PDU B 1 
C35 C 0.5139(9) 0.0909(13) 0.3714(7) 0.067(6) Uani 0.551(9) 1 d PDU B 1 
H35A H 0.5220 0.0317 0.3701 0.080 Uiso 0.551(9) 1 calc PR B 1 
H35B H 0.5481 0.1211 0.3671 0.080 Uiso 0.551(9) 1 calc PR B 1 
C36 C 0.4539(9) 0.1127(9) 0.3154(8) 0.073(5) Uani 0.551(9) 1 d PDU B 1 
H36A H 0.4561 0.0969 0.2746 0.088 Uiso 0.551(9) 1 calc PR B 1 
H36B H 0.4192 0.0833 0.3194 0.088 Uiso 0.551(9) 1 calc PR B 1 
O1' O 0.4604(8) 0.1658(10) 0.3320(6) 0.063(5) Uani 0.449(9) 1 d PDU B 2 
C25' C 0.4425(10) 0.2055(14) 0.2722(7) 0.067(6) Uani 0.449(9) 1 d PDU B 2 
H25C H 0.4351 0.1643 0.2381 0.080 Uiso 0.449(9) 1 calc PR B 2 
H25D H 0.4757 0.2423 0.2726 0.080 Uiso 0.449(9) 1 calc PR B 2 
C26' C 0.3843(10) 0.2545(13) 0.2589(7) 0.074(8) Uani 0.449(9) 1 d PDU B 2 
H26C H 0.3657 0.2735 0.2141 0.089 Uiso 0.449(9) 1 calc PR B 2 
H26D H 0.3538 0.2225 0.2686 0.089 Uiso 0.449(9) 1 calc PR B 2 
O2' O 0.4080(6) 0.3220(8) 0.3028(6) 0.057(4) Uani 0.449(9) 1 d PDU B 2 
C27' C 0.3620(8) 0.3834(10) 0.2912(8) 0.062(5) Uani 0.449(9) 1 d PDU B 2 
H27C H 0.3246 0.3593 0.2931 0.075 Uiso 0.449(9) 1 calc PR B 2 
H27D H 0.3511 0.4080 0.2485 0.075 Uiso 0.449(9) 1 calc PR B 2 
C28' C 0.3885(15) 0.4475(10) 0.3425(7) 0.053(6) Uani 0.449(9) 1 d PDU B 2 
H28C H 0.4296 0.4644 0.3457 0.063 Uiso 0.449(9) 1 calc PR B 2 
H28D H 0.3617 0.4963 0.3322 0.063 Uiso 0.449(9) 1 calc PR B 2 
O3' O 0.3927(6) 0.4125(7) 0.4009(6) 0.054(4) Uani 0.449(9) 1 d PDU B 2 
C29' C 0.4063(11) 0.4709(9) 0.4511(8) 0.061(5) Uani 0.449(9) 1 d PDU B 2 
H29C H 0.3704 0.5073 0.4408 0.074 Uiso 0.449(9) 1 calc PR B 2 
H29D H 0.4410 0.5050 0.4520 0.074 Uiso 0.449(9) 1 calc PR B 2 
C30' C 0.4223(14) 0.4359(14) 0.5172(8) 0.064(8) Uani 0.449(9) 1 d PDU B 2 
H30C H 0.4349 0.4802 0.5494 0.076 Uiso 0.449(9) 1 calc PR B 2 
H30D H 0.3865 0.4076 0.5193 0.076 Uiso 0.449(9) 1 calc PR B 2 
O4' O 0.4720(6) 0.3792(7) 0.5296(5) 0.054(4) Uani 0.449(9) 1 d PDU B 2 
C31' C 0.4930(9) 0.3467(11) 0.5940(6) 0.056(5) Uani 0.449(9) 1 d PDU B 2 
H31C H 0.4595 0.3163 0.5994 0.067 Uiso 0.449(9) 1 calc PR B 2 
H31D H 0.5057 0.3920 0.6253 0.067 Uiso 0.449(9) 1 calc PR B 2 
C32' C 0.5472(8) 0.2897(11) 0.6052(8) 0.056(6) Uani 0.449(9) 1 d PDU B 2 
H32C H 0.5806 0.3205 0.5998 0.067 Uiso 0.449(9) 1 calc PR B 2 
H32D H 0.5630 0.2687 0.6495 0.067 Uiso 0.449(9) 1 calc PR B 2 
O5' O 0.5293(7) 0.2227(8) 0.5616(5) 0.050(4) Uani 0.449(9) 1 d PDU B 2 
C33' C 0.5734(9) 0.1611(11) 0.5715(8) 0.057(5) Uani 0.449(9) 1 d PDU B 2 
H33C H 0.5828 0.1360 0.6138 0.068 Uiso 0.449(9) 1 calc PR B 2 
H33D H 0.6115 0.1868 0.5727 0.068 Uiso 0.449(9) 1 calc PR B 2 
C34' C 0.5549(12) 0.0928(10) 0.5211(7) 0.053(6) Uani 0.449(9) 1 d PDU B 2 
H34C H 0.5894 0.0541 0.5301 0.064 Uiso 0.449(9) 1 calc PR B 2 
H34D H 0.5194 0.0622 0.5221 0.064 Uiso 0.449(9) 1 calc PR B 2 
O6' O 0.5391(7) 0.1300(8) 0.4592(6) 0.054(4) Uani 0.449(9) 1 d PDU B 2 
C35' C 0.5247(12) 0.0703(10) 0.4095(8) 0.064(6) Uani 0.449(9) 1 d PDU B 2 
H35C H 0.4880 0.0387 0.4060 0.077 Uiso 0.449(9) 1 calc PR B 2 
H35D H 0.5593 0.0318 0.4188 0.077 Uiso 0.449(9) 1 calc PR B 2 
C36' C 0.5126(12) 0.1156(14) 0.3481(9) 0.074(8) Uani 0.449(9) 1 d PDU B 2 
H36C H 0.5486 0.1496 0.3530 0.089 Uiso 0.449(9) 1 calc PR B 2 
H36D H 0.5062 0.0759 0.3133 0.089 Uiso 0.449(9) 1 calc PR B 2 
O1S O -0.002(2) 0.4444(6) 0.2437(18) 0.046(4) Uani 0.50 1 d PU C -2 
C1S C -0.107(2) 0.450(3) 0.199(2) 0.044(6) Uani 0.50 1 d PU C -2 
H1SA H -0.1433 0.4169 0.1744 0.067 Uiso 0.50 1 calc PR C -2 
H1SB H -0.1064 0.4985 0.1742 0.067 Uiso 0.50 1 calc PR C -2 
H1SC H -0.1082 0.4660 0.2394 0.067 Uiso 0.50 1 calc PR C -2 
C2S C -0.0509(11) 0.4004(16) 0.2110(12) 0.048(4) Uani 0.50 1 d PU C -2 
H2SA H -0.0515 0.3506 0.2353 0.058 Uiso 0.50 1 calc PR C -2 
H2SB H -0.0496 0.3833 0.1699 0.058 Uiso 0.50 1 calc PR C -2 
C3S C 0.0601(11) 0.4039(16) 0.2691(12) 0.051(5) Uani 0.50 1 d PU C -2 
H3SA H 0.0686 0.3828 0.2328 0.061 Uiso 0.50 1 calc PR C -2 
H3SB H 0.0596 0.3568 0.2960 0.061 Uiso 0.50 1 calc PR C -2 
C4S C 0.112(2) 0.463(3) 0.309(3) 0.062(9) Uani 0.50 1 d PU C -2 
H4SA H 0.1521 0.4367 0.3197 0.093 Uiso 0.50 1 calc PR C -2 
H4SB H 0.1076 0.4780 0.3484 0.093 Uiso 0.50 1 calc PR C -2 
H4SC H 0.1103 0.5129 0.2841 0.093 Uiso 0.50 1 calc PR C -2 
 
loop_ 
 _atom_site_aniso_label 
 _atom_site_aniso_U_11 
 _atom_site_aniso_U_22 
 _atom_site_aniso_U_33 
 _atom_site_aniso_U_23 
 _atom_site_aniso_U_13 
 _atom_site_aniso_U_12 
Fe1 0.0258(7) 0.0268(7) 0.0294(7) -0.0021(6) 0.0115(6) -0.0002(6) 
K1 0.0375(10) 0.0439(11) 0.0624(13) -0.0164(10) 0.0071(9) 0.0034(8) 
N1 0.030(3) 0.049(4) 0.042(4) -0.004(3) 0.012(3) 0.003(3) 
C1 0.025(3) 0.031(3) 0.021(3) -0.001(3) 0.012(3) 0.002(3) 
C2 0.025(3) 0.029(4) 0.032(4) -0.003(3) 0.012(3) 0.000(3) 
C3 0.030(3) 0.033(4) 0.030(4) 0.000(3) 0.015(3) 0.007(3) 
C4 0.034(4) 0.024(3) 0.030(4) -0.001(3) 0.013(3) 0.003(3) 
C5 0.025(3) 0.031(4) 0.033(4) -0.002(3) 0.015(3) 0.000(3) 
C6 0.034(4) 0.032(4) 0.030(4) 0.000(3) 0.016(3) 0.003(3) 
C16 0.026(3) 0.037(4) 0.033(4) -0.004(3) 0.014(3) -0.005(3) 
C21 0.034(4) 0.039(4) 0.034(4) 0.003(3) 0.015(3) -0.007(3) 
C20 0.053(5) 0.063(6) 0.029(4) 0.004(4) 0.016(4) -0.010(4) 
C19 0.054(5) 0.081(7) 0.032(4) -0.014(5) 0.026(4) -0.014(5) 
C18 0.042(5) 0.069(6) 0.051(5) -0.032(5) 0.025(4) -0.009(4) 
C17 0.027(4) 0.047(5) 0.044(5) -0.013(4) 0.017(3) -0.003(3) 
C24 0.061(5) 0.036(4) 0.030(4) 0.005(3) 0.016(4) -0.001(4) 
C23 0.129(12) 0.119(11) 0.045(6) -0.023(7) 0.053(7) -0.024(10) 
C22 0.056(5) 0.045(5) 0.056(6) -0.017(4) 0.024(5) 0.012(4) 
C7 0.035(4) 0.028(3) 0.029(4) -0.005(3) 0.018(3) -0.004(3) 
C8 0.058(5) 0.032(4) 0.031(4) -0.001(3) 0.023(4) 0.004(4) 
C9 0.080(7) 0.027(4) 0.048(5) -0.002(4) 0.040(5) -0.001(4) 
C10 0.068(6) 0.035(4) 0.046(5) -0.011(4) 0.038(5) -0.015(4) 
C11 0.044(4) 0.048(5) 0.039(4) -0.012(4) 0.023(4) -0.015(4) 
C12 0.037(4) 0.031(4) 0.028(4) -0.008(3) 0.017(3) -0.005(3) 
C13 0.066(6) 0.037(5) 0.042(5) 0.005(4) 0.016(4) 0.014(4) 
C14 0.101(9) 0.048(6) 0.090(8) -0.009(6) 0.058(7) -0.035(6) 
C15 0.031(4) 0.046(5) 0.036(4) -0.002(4) 0.008(3) -0.007(3) 
B1 0.028(4) 0.030(4) 0.026(4) -0.001(3) 0.013(3) 0.003(3) 
O1 0.059(8) 0.062(8) 0.028(6) -0.003(5) 0.026(5) -0.018(6) 
C25 0.056(14) 0.087(11) 0.079(15) -0.035(10) -0.007(10) -0.010(10) 
C26 0.064(12) 0.074(9) 0.043(9) 0.011(7) 0.028(9) -0.014(9) 
O2 0.038(6) 0.049(6) 0.051(6) 0.016(5) 0.018(5) -0.001(5) 
C27 0.022(10) 0.052(8) 0.075(9) 0.010(9) 0.006(8) -0.001(9) 
C28 0.038(9) 0.051(10) 0.097(10) 0.009(8) 0.034(8) 0.005(7) 
O3 0.036(6) 0.042(7) 0.075(7) -0.019(6) 0.025(5) 0.004(5) 
C29 0.054(12) 0.063(13) 0.079(10) -0.037(10) 0.035(9) -0.004(9) 
C30 0.056(10) 0.075(9) 0.072(9) -0.038(9) 0.034(8) -0.017(8) 
O4 0.045(7) 0.073(8) 0.052(7) -0.025(6) 0.020(5) -0.013(6) 
C31 0.050(12) 0.119(13) 0.060(11) -0.022(10) 0.008(9) 0.008(12) 
C32 0.070(13) 0.114(12) 0.053(11) -0.002(10) -0.005(9) 0.010(12) 
O5 0.071(11) 0.088(12) 0.060(9) -0.028(9) 0.003(7) -0.009(9) 
C33 0.049(11) 0.090(13) 0.110(11) 0.009(14) 0.034(12) 0.018(12) 
C34 0.044(10) 0.076(14) 0.108(12) -0.013(12) 0.022(9) 0.020(10) 
O6 0.038(7) 0.061(9) 0.090(9) -0.022(8) 0.024(6) 0.017(6) 
C35 0.063(11) 0.041(11) 0.108(12) -0.022(12) 0.047(10) 0.009(8) 
C36 0.074(12) 0.070(10) 0.086(10) -0.018(10) 0.042(9) -0.004(10) 
O1' 0.061(11) 0.086(15) 0.041(9) 0.011(9) 0.019(8) -0.016(9) 
C25' 0.054(12) 0.080(14) 0.064(13) 0.019(10) 0.021(11) 0.004(10) 
C26' 0.038(12) 0.112(17) 0.069(16) -0.018(11) 0.019(10) 0.013(12) 
O2' 0.037(8) 0.066(9) 0.062(10) 0.020(7) 0.014(7) -0.005(6) 
C27' 0.038(10) 0.077(13) 0.071(11) 0.011(11) 0.021(10) -0.002(9) 
C28' 0.031(14) 0.053(11) 0.063(10) 0.029(8) 0.008(11) -0.005(10) 
O3' 0.041(8) 0.059(10) 0.066(8) 0.021(7) 0.024(7) 0.002(7) 
C29' 0.043(11) 0.064(14) 0.077(11) 0.010(8) 0.023(10) -0.002(10) 
C30' 0.066(18) 0.066(18) 0.073(10) -0.001(12) 0.043(13) 0.016(13) 
O4' 0.052(8) 0.046(9) 0.061(9) -0.017(7) 0.018(7) 0.001(6) 
C31' 0.046(11) 0.057(12) 0.071(12) -0.006(10) 0.031(10) -0.006(8) 
C32' 0.037(11) 0.055(11) 0.058(12) -0.020(8) 0.000(9) -0.005(8) 
O5' 0.053(8) 0.058(9) 0.038(8) -0.026(7) 0.016(7) -0.018(7) 
C33' 0.063(13) 0.050(11) 0.051(10) -0.013(9) 0.016(11) -0.014(9) 
C34' 0.071(16) 0.027(9) 0.066(10) -0.004(7) 0.031(12) 0.001(10) 
O6' 0.065(12) 0.034(8) 0.058(8) -0.006(6) 0.019(9) 0.010(8) 
C35' 0.082(16) 0.048(13) 0.064(10) -0.013(8) 0.031(12) 0.013(11) 
C36' 0.086(16) 0.055(16) 0.064(10) -0.005(10) 0.011(13) -0.005(11) 
O1S 0.043(5) 0.043(4) 0.056(10) -0.002(6) 0.024(6) -0.004(6) 
C1S 0.040(8) 0.038(14) 0.056(14) -0.009(12) 0.020(11) -0.005(9) 
C2S 0.047(7) 0.045(8) 0.056(10) -0.018(8) 0.025(7) -0.003(7) 
C3S 0.045(7) 0.048(8) 0.063(11) -0.010(8) 0.025(7) 0.004(7) 
C4S 0.041(10) 0.053(16) 0.080(17) -0.011(13) 0.010(11) 0.008(11) 
 
_geom_special_details 
; 
 All esds (except the esd in the dihedral angle between two l.s. planes) 
 are estimated using the full covariance matrix.  The cell esds are taken 
 into account individually in the estimation of esds in distances, angles 
 and torsion angles; correlations between esds in cell parameters are only 
 used when they are defined by crystal symmetry.  An approximate (isotropic) 
 treatment of cell esds is used for estimating esds involving l.s. planes. 
; 
 
loop_ 
 _geom_bond_atom_site_label_1 
 _geom_bond_atom_site_label_2 
 _geom_bond_distance 
 _geom_bond_site_symmetry_2 
 _geom_bond_publ_flag 
Fe1 C3 2.034(7) . ? 
Fe1 C3 2.034(7) 7_556 ? 
Fe1 C5 2.044(7) . ? 
Fe1 C5 2.044(7) 7_556 ? 
Fe1 C4 2.046(7) . ? 
Fe1 C4 2.046(7) 7_556 ? 
Fe1 C2 2.052(7) . ? 
Fe1 C2 2.052(7) 7_556 ? 
Fe1 C1 2.118(6) . ? 
Fe1 C1 2.118(6) 7_556 ? 
K1 O2 2.727(9) . ? 
K1 O5' 2.758(11) . ? 
K1 O1 2.761(10) . ? 
K1 N1 2.771(8) . ? 
K1 O6 2.773(10) . ? 
K1 O4' 2.793(11) . ? 
K1 O3' 2.797(11) . ? 
K1 O3 2.797(9) . ? 
K1 O6' 2.815(11) . ? 
K1 O4 2.823(9) . ? 
K1 O1' 2.826(12) . ? 
K1 O5 2.873(11) . ? 
N1 C6 1.159(9) . ? 
C1 C5 1.426(10) . ? 
C1 C2 1.440(9) . ? 
C1 B1 1.637(10) . ? 
C2 C3 1.447(10) . ? 
C2 H2A 0.9800 . ? 
C3 C4 1.430(10) . ? 
C3 H3A 0.9800 . ? 
C4 C5 1.430(9) . ? 
C4 H4A 0.9800 . ? 
C5 H5A 0.9800 . ? 
C6 B1 1.602(10) . ? 
C16 C21 1.418(11) . ? 
C16 C17 1.421(10) . ? 
C16 B1 1.700(10) . ? 
C21 C20 1.397(11) . ? 
C21 C24 1.525(11) . ? 
C20 C19 1.359(14) . ? 
C20 H20A 0.9300 . ? 
C19 C18 1.383(15) . ? 
C19 C23 1.515(12) . ? 
C18 C17 1.391(12) . ? 
C18 H18A 0.9300 . ? 
C17 C22 1.505(13) . ? 
C24 H24A 0.9600 . ? 
C24 H24B 0.9600 . ? 
C24 H24C 0.9600 . ? 
C23 H23A 0.9600 . ? 
C23 H23B 0.9600 . ? 
C23 H23C 0.9600 . ? 
C22 H22A 0.9600 . ? 
C22 H22B 0.9600 . ? 
C22 H22C 0.9600 . ? 
C7 C12 1.413(10) . ? 
C7 C8 1.434(10) . ? 
C7 B1 1.661(11) . ? 
C8 C9 1.381(12) . ? 
C8 C13 1.513(12) . ? 
C9 C10 1.375(13) . ? 
C9 H9A 0.9300 . ? 
C10 C11 1.381(13) . ? 
C10 C14 1.537(12) . ? 
C11 C12 1.405(10) . ? 
C11 H11A 0.9300 . ? 
C12 C15 1.517(11) . ? 
C13 H13A 0.9600 . ? 
C13 H13B 0.9600 . ? 
C13 H13C 0.9600 . ? 
C14 H14A 0.9600 . ? 
C14 H14B 0.9600 . ? 
C14 H14C 0.9600 . ? 
C15 H15A 0.9600 . ? 
C15 H15B 0.9600 . ? 
C15 H15C 0.9600 . ? 
O1 C36 1.421(13) . ? 
O1 C25 1.431(13) . ? 
C25 C26 1.509(16) . ? 
C25 H25A 0.9700 . ? 
C25 H25B 0.9700 . ? 
C26 O2 1.404(12) . ? 
C26 H26A 0.9700 . ? 
C26 H26B 0.9700 . ? 
O2 C27 1.411(12) . ? 
C27 C28 1.481(17) . ? 
C27 H27A 0.9700 . ? 
C27 H27B 0.9700 . ? 
C28 O3 1.424(12) . ? 
C28 H28A 0.9700 . ? 
C28 H28B 0.9700 . ? 
O3 C29 1.410(13) . ? 
C29 C30 1.497(17) . ? 
C29 H29A 0.9700 . ? 
C29 H29B 0.9700 . ? 
C30 O4 1.402(12) . ? 
C30 H30A 0.9700 . ? 
C30 H30B 0.9700 . ? 
O4 C31 1.392(12) . ? 
C31 C32 1.489(18) . ? 
C31 H31A 0.9700 . ? 
C31 H31B 0.9700 . ? 
C32 O5 1.418(14) . ? 
C32 H32A 0.9700 . ? 
C32 H32B 0.9700 . ? 
O5 C33 1.412(14) . ? 
C33 C34 1.487(17) . ? 
C33 H33A 0.9700 . ? 
C33 H33B 0.9700 . ? 
C34 O6 1.391(12) . ? 
C34 H34A 0.9700 . ? 
C34 H34B 0.9700 . ? 
O6 C35 1.402(13) . ? 
C35 C36 1.502(17) . ? 
C35 H35A 0.9700 . ? 
C35 H35B 0.9700 . ? 
C36 H36A 0.9700 . ? 
C36 H36B 0.9700 . ? 
O1' C36' 1.383(14) . ? 
O1' C25' 1.389(13) . ? 
C25' C26' 1.493(17) . ? 
C25' H25C 0.9700 . ? 
C25' H25D 0.9700 . ? 
C26' O2' 1.417(14) . ? 
C26' H26C 0.9700 . ? 
C26' H26D 0.9700 . ? 
O2' C27' 1.403(13) . ? 
C27' C28' 1.480(18) . ? 
C27' H27C 0.9700 . ? 
C27' H27D 0.9700 . ? 
C28' O3' 1.391(13) . ? 
C28' H28C 0.9700 . ? 
C28' H28D 0.9700 . ? 
O3' C29' 1.399(13) . ? 
C29' C30' 1.485(18) . ? 
C29' H29C 0.9700 . ? 
C29' H29D 0.9700 . ? 
C30' O4' 1.411(14) . ? 
C30' H30C 0.9700 . ? 
C30' H30D 0.9700 . ? 
O4' C31' 1.425(13) . ? 
C31' C32' 1.498(17) . ? 
C31' H31C 0.9700 . ? 
C31' H31D 0.9700 . ? 
C32' O5' 1.400(13) . ? 
C32' H32C 0.9700 . ? 
C32' H32D 0.9700 . ? 
O5' C33' 1.379(13) . ? 
C33' C34' 1.506(17) . ? 
C33' H33C 0.9700 . ? 
C33' H33D 0.9700 . ? 
C34' O6' 1.417(14) . ? 
C34' H34C 0.9700 . ? 
C34' H34D 0.9700 . ? 
O6' C35' 1.403(13) . ? 
C35' C36' 1.479(18) . ? 
C35' H35C 0.9700 . ? 
C35' H35D 0.9700 . ? 
C36' H36C 0.9700 . ? 
C36' H36D 0.9700 . ? 
O1S C2S 1.29(4) . ? 
O1S C3S 1.48(5) . ? 
C1S C2S 1.46(4) . ? 
C1S H1SA 0.9600 . ? 
C1S H1SB 0.9600 . ? 
C1S H1SC 0.9600 . ? 
C2S H2SA 0.9700 . ? 
C2S H2SB 0.9700 . ? 
C3S C4S 1.53(5) . ? 
C3S H3SA 0.9700 . ? 
C3S H3SB 0.9700 . ? 
C4S H4SA 0.9600 . ? 
C4S H4SB 0.9600 . ? 
C4S H4SC 0.9600 . ? 
 
loop_ 
 _geom_angle_atom_site_label_1 
 _geom_angle_atom_site_label_2 
 _geom_angle_atom_site_label_3 
 _geom_angle 
 _geom_angle_site_symmetry_1 
 _geom_angle_site_symmetry_3 
 _geom_angle_publ_flag 
C3 Fe1 C3 180.000(2) . 7_556 ? 
C3 Fe1 C5 68.7(3) . . ? 
C3 Fe1 C5 111.3(3) 7_556 . ? 
C3 Fe1 C5 111.3(3) . 7_556 ? 
C3 Fe1 C5 68.7(3) 7_556 7_556 ? 
C5 Fe1 C5 180.000(1) . 7_556 ? 
C3 Fe1 C4 41.0(3) . . ? 
C3 Fe1 C4 139.0(3) 7_556 . ? 
C5 Fe1 C4 40.9(3) . . ? 
C5 Fe1 C4 139.1(3) 7_556 . ? 
C3 Fe1 C4 139.0(3) . 7_556 ? 
C3 Fe1 C4 41.0(3) 7_556 7_556 ? 
C5 Fe1 C4 139.1(3) . 7_556 ? 
C5 Fe1 C4 40.9(3) 7_556 7_556 ? 
C4 Fe1 C4 180.000(1) . 7_556 ? 
C3 Fe1 C2 41.5(3) . . ? 
C3 Fe1 C2 138.5(3) 7_556 . ? 
C5 Fe1 C2 68.1(3) . . ? 
C5 Fe1 C2 111.9(3) 7_556 . ? 
C4 Fe1 C2 69.1(3) . . ? 
C4 Fe1 C2 110.9(3) 7_556 . ? 
C3 Fe1 C2 138.5(3) . 7_556 ? 
C3 Fe1 C2 41.5(3) 7_556 7_556 ? 
C5 Fe1 C2 111.9(3) . 7_556 ? 
C5 Fe1 C2 68.1(3) 7_556 7_556 ? 
C4 Fe1 C2 110.9(3) . 7_556 ? 
C4 Fe1 C2 69.1(3) 7_556 7_556 ? 
C2 Fe1 C2 180.000(1) . 7_556 ? 
C3 Fe1 C1 68.7(3) . . ? 
C3 Fe1 C1 111.3(3) 7_556 . ? 
C5 Fe1 C1 40.0(3) . . ? 
C5 Fe1 C1 140.0(3) 7_556 . ? 
C4 Fe1 C1 68.4(3) . . ? 
C4 Fe1 C1 111.6(3) 7_556 . ? 
C2 Fe1 C1 40.3(2) . . ? 
C2 Fe1 C1 139.7(2) 7_556 . ? 
C3 Fe1 C1 111.3(3) . 7_556 ? 
C3 Fe1 C1 68.7(3) 7_556 7_556 ? 
C5 Fe1 C1 140.0(3) . 7_556 ? 
C5 Fe1 C1 40.0(3) 7_556 7_556 ? 
C4 Fe1 C1 111.6(3) . 7_556 ? 
C4 Fe1 C1 68.4(3) 7_556 7_556 ? 
C2 Fe1 C1 139.7(2) . 7_556 ? 
C2 Fe1 C1 40.3(2) 7_556 7_556 ? 
C1 Fe1 C1 180.000(1) . 7_556 ? 
O2 K1 O5' 159.0(3) . . ? 
O2 K1 O1 62.2(3) . . ? 
O5' K1 O1 131.9(3) . . ? 
O2 K1 N1 103.4(3) . . ? 
O5' K1 N1 93.3(4) . . ? 
O1 K1 N1 88.3(3) . . ? 
O2 K1 O6 123.2(3) . . ? 
O5' K1 O6 73.4(3) . . ? 
O1 K1 O6 61.0(3) . . ? 
N1 K1 O6 73.7(3) . . ? 
O2 K1 O4' 99.7(3) . . ? 
O5' K1 O4' 60.5(3) . . ? 
O1 K1 O4' 150.8(4) . . ? 
N1 K1 O4' 119.4(4) . . ? 
O6 K1 O4' 132.0(3) . . ? 
O2 K1 O3' 40.3(3) . . ? 
O5' K1 O3' 120.3(3) . . ? 
O1 K1 O3' 101.1(3) . . ? 
N1 K1 O3' 116.8(3) . . ? 
O6 K1 O3' 160.1(4) . . ? 
O4' K1 O3' 59.8(3) . . ? 
O2 K1 O3 60.4(2) . . ? 
O5' K1 O3 99.7(3) . . ? 
O1 K1 O3 118.7(3) . . ? 
N1 K1 O3 124.2(3) . . ? 
O6 K1 O3 161.7(4) . . ? 
O4' K1 O3 39.3(3) . . ? 
O3' K1 O3 20.7(3) . . ? 
O2 K1 O6' 132.7(3) . . ? 
O5' K1 O6' 60.7(3) . . ? 
O1 K1 O6' 71.6(3) . . ? 
N1 K1 O6' 84.4(4) . . ? 
O6 K1 O6' 15.5(3) . . ? 
O4' K1 O6' 117.0(3) . . ? 
O3' K1 O6' 157.8(4) . . ? 
O3 K1 O6' 147.9(4) . . ? 
O2 K1 O4 119.0(3) . . ? 
O5' K1 O4 44.0(3) . . ? 
O1 K1 O4 170.1(4) . . ? 
N1 K1 O4 100.6(3) . . ? 
O6 K1 O4 117.2(3) . . ? 
O4' K1 O4 22.9(3) . . ? 
O3' K1 O4 78.8(3) . . ? 
O3 K1 O4 59.6(2) . . ? 
O6' K1 O4 104.7(3) . . ? 
O2 K1 O1' 75.8(3) . . ? 
O5' K1 O1' 119.4(3) . . ? 
O1 K1 O1' 13.7(3) . . ? 
N1 K1 O1' 82.9(4) . . ? 
O6 K1 O1' 47.3(3) . . ? 
O4' K1 O1' 157.6(5) . . ? 
O3' K1 O1' 114.8(3) . . ? 
O3 K1 O1' 131.9(4) . . ? 
O6' K1 O1' 58.7(3) . . ? 
O4 K1 O1' 162.8(4) . . ? 
O2 K1 O5 167.8(4) . . ? 
O5' K1 O5 14.5(3) . . ? 
O1 K1 O5 118.0(3) . . ? 
N1 K1 O5 88.7(4) . . ? 
O6 K1 O5 58.9(3) . . ? 
O4' K1 O5 74.7(3) . . ? 
O3' K1 O5 134.2(3) . . ? 
O3 K1 O5 113.5(3) . . ? 
O6' K1 O5 46.5(3) . . ? 
O4 K1 O5 58.5(3) . . ? 
O1' K1 O5 105.1(3) . . ? 
C6 N1 K1 127.9(6) . . ? 
C5 C1 C2 106.3(6) . . ? 
C5 C1 B1 126.0(6) . . ? 
C2 C1 B1 127.6(6) . . ? 
C5 C1 Fe1 67.2(4) . . ? 
C2 C1 Fe1 67.4(4) . . ? 
B1 C1 Fe1 131.7(5) . . ? 
C1 C2 C3 108.5(6) . . ? 
C1 C2 Fe1 72.3(4) . . ? 
C3 C2 Fe1 68.6(4) . . ? 
C1 C2 H2A 125.7 . . ? 
C3 C2 H2A 125.7 . . ? 
Fe1 C2 H2A 125.7 . . ? 
C4 C3 C2 107.8(6) . . ? 
C4 C3 Fe1 69.9(4) . . ? 
C2 C3 Fe1 69.9(4) . . ? 
C4 C3 H3A 126.1 . . ? 
C2 C3 H3A 126.1 . . ? 
Fe1 C3 H3A 126.1 . . ? 
C5 C4 C3 107.1(6) . . ? 
C5 C4 Fe1 69.5(4) . . ? 
C3 C4 Fe1 69.0(4) . . ? 
C5 C4 H4A 126.4 . . ? 
C3 C4 H4A 126.4 . . ? 
Fe1 C4 H4A 126.4 . . ? 
C1 C5 C4 110.1(6) . . ? 
C1 C5 Fe1 72.8(4) . . ? 
C4 C5 Fe1 69.6(4) . . ? 
C1 C5 H5A 124.9 . . ? 
C4 C5 H5A 124.9 . . ? 
Fe1 C5 H5A 124.9 . . ? 
N1 C6 B1 171.4(8) . . ? 
C21 C16 C17 115.3(7) . . ? 
C21 C16 B1 126.9(7) . . ? 
C17 C16 B1 117.8(7) . . ? 
C20 C21 C16 120.5(8) . . ? 
C20 C21 C24 116.0(7) . . ? 
C16 C21 C24 123.5(7) . . ? 
C19 C20 C21 123.6(9) . . ? 
C19 C20 H20A 118.2 . . ? 
C21 C20 H20A 118.2 . . ? 
C20 C19 C18 117.0(8) . . ? 
C20 C19 C23 122.7(11) . . ? 
C18 C19 C23 120.3(10) . . ? 
C19 C18 C17 121.9(8) . . ? 
C19 C18 H18A 119.0 . . ? 
C17 C18 H18A 119.0 . . ? 
C18 C17 C16 121.7(8) . . ? 
C18 C17 C22 115.1(8) . . ? 
C16 C17 C22 123.2(7) . . ? 
C19 C23 H23A 109.5 . . ? 
C19 C23 H23B 109.5 . . ? 
C19 C23 H23C 109.5 . . ? 
C17 C22 H22A 109.5 . . ? 
C17 C22 H22B 109.5 . . ? 
C17 C22 H22C 109.5 . . ? 
C12 C7 C8 113.8(7) . . ? 
C12 C7 B1 121.0(6) . . ? 
C8 C7 B1 125.2(7) . . ? 
C9 C8 C7 121.8(8) . . ? 
C9 C8 C13 116.4(8) . . ? 
C7 C8 C13 121.8(7) . . ? 
C10 C9 C8 123.3(8) . . ? 
C10 C9 H9A 118.3 . . ? 
C8 C9 H9A 118.3 . . ? 
C9 C10 C11 116.7(8) . . ? 
C9 C10 C14 122.2(9) . . ? 
C11 C10 C14 121.2(9) . . ? 
C10 C11 C12 121.6(8) . . ? 
C10 C11 H11A 119.2 . . ? 
C12 C11 H11A 119.2 . . ? 
C11 C12 C7 122.7(7) . . ? 
C11 C12 C15 115.2(7) . . ? 
C7 C12 C15 122.1(7) . . ? 
C8 C13 H13A 109.5 . . ? 
C8 C13 H13B 109.5 . . ? 
H13A C13 H13B 109.5 . . ? 
C8 C13 H13C 109.5 . . ? 
H13A C13 H13C 109.5 . . ? 
H13B C13 H13C 109.5 . . ? 
C10 C14 H14A 109.5 . . ? 
C10 C14 H14B 109.5 . . ? 
H14A C14 H14B 109.5 . . ? 
C10 C14 H14C 109.5 . . ? 
H14A C14 H14C 109.5 . . ? 
H14B C14 H14C 109.5 . . ? 
C12 C15 H15A 109.5 . . ? 
C12 C15 H15B 109.5 . . ? 
H15A C15 H15B 109.5 . . ? 
C12 C15 H15C 109.5 . . ? 
H15A C15 H15C 109.5 . . ? 
H15B C15 H15C 109.5 . . ? 
C6 B1 C1 102.6(6) . . ? 
C6 B1 C7 116.9(6) . . ? 
C1 B1 C7 110.6(5) . . ? 
C6 B1 C16 100.5(5) . . ? 
C1 B1 C16 115.3(6) . . ? 
C7 B1 C16 110.7(6) . . ? 
C36 O1 C25 110.6(11) . . ? 
C36 O1 K1 112.9(8) . . ? 
C25 O1 K1 113.5(9) . . ? 
O1 C25 C26 109.4(13) . . ? 
O1 C25 H25A 109.8 . . ? 
C26 C25 H25A 109.8 . . ? 
O1 C25 H25B 109.8 . . ? 
C26 C25 H25B 109.8 . . ? 
H25A C25 H25B 108.2 . . ? 
O2 C26 C25 115.4(11) . . ? 
O2 C26 H26A 108.4 . . ? 
C25 C26 H26A 108.4 . . ? 
O2 C26 H26B 108.4 . . ? 
C25 C26 H26B 108.4 . . ? 
H26A C26 H26B 107.5 . . ? 
C26 O2 C27 112.4(10) . . ? 
C26 O2 K1 117.1(8) . . ? 
C27 O2 K1 119.8(8) . . ? 
O2 C27 C28 110.3(12) . . ? 
O2 C27 H27A 109.6 . . ? 
C28 C27 H27A 109.6 . . ? 
O2 C27 H27B 109.6 . . ? 
C28 C27 H27B 109.6 . . ? 
H27A C27 H27B 108.1 . . ? 
O3 C28 C27 112.1(11) . . ? 
O3 C28 H28A 109.2 . . ? 
C27 C28 H28A 109.2 . . ? 
O3 C28 H28B 109.2 . . ? 
C27 C28 H28B 109.2 . . ? 
H28A C28 H28B 107.9 . . ? 
C29 O3 C28 110.7(10) . . ? 
C29 O3 K1 113.9(9) . . ? 
C28 O3 K1 114.9(8) . . ? 
O3 C29 C30 106.8(13) . . ? 
O3 C29 H29A 110.4 . . ? 
C30 C29 H29A 110.4 . . ? 
O3 C29 H29B 110.4 . . ? 
C30 C29 H29B 110.4 . . ? 
H29A C29 H29B 108.6 . . ? 
O4 C30 C29 108.4(12) . . ? 
O4 C30 H30A 110.0 . . ? 
C29 C30 H30A 110.0 . . ? 
O4 C30 H30B 110.0 . . ? 
C29 C30 H30B 110.0 . . ? 
H30A C30 H30B 108.4 . . ? 
C31 O4 C30 114.0(11) . . ? 
C31 O4 K1 116.9(8) . . ? 
C30 O4 K1 114.6(8) . . ? 
O4 C31 C32 112.9(12) . . ? 
O4 C31 H31A 109.0 . . ? 
C32 C31 H31A 109.0 . . ? 
O4 C31 H31B 109.0 . . ? 
C32 C31 H31B 109.0 . . ? 
H31A C31 H31B 107.8 . . ? 
O5 C32 C31 104.3(14) . . ? 
O5 C32 H32A 110.9 . . ? 
C31 C32 H32A 110.9 . . ? 
O5 C32 H32B 110.9 . . ? 
C31 C32 H32B 110.9 . . ? 
H32A C32 H32B 108.9 . . ? 
C33 O5 C32 110.9(13) . . ? 
C33 O5 K1 111.5(9) . . ? 
C32 O5 K1 111.1(9) . . ? 
O5 C33 C34 109.8(15) . . ? 
O5 C33 H33A 109.7 . . ? 
C34 C33 H33A 109.7 . . ? 
O5 C33 H33B 109.7 . . ? 
C34 C33 H33B 109.7 . . ? 
H33A C33 H33B 108.2 . . ? 
O6 C34 C33 106.2(13) . . ? 
O6 C34 H34A 110.5 . . ? 
C33 C34 H34A 110.5 . . ? 
O6 C34 H34B 110.5 . . ? 
C33 C34 H34B 110.5 . . ? 
H34A C34 H34B 108.7 . . ? 
C34 O6 C35 113.4(11) . . ? 
C34 O6 K1 118.6(9) . . ? 
C35 O6 K1 116.1(8) . . ? 
O6 C35 C36 111.8(12) . . ? 
O6 C35 H35A 109.3 . . ? 
C36 C35 H35A 109.3 . . ? 
O6 C35 H35B 109.3 . . ? 
C36 C35 H35B 109.3 . . ? 
H35A C35 H35B 107.9 . . ? 
O1 C36 C35 107.8(13) . . ? 
O1 C36 H36A 110.2 . . ? 
C35 C36 H36A 110.2 . . ? 
O1 C36 H36B 110.2 . . ? 
C35 C36 H36B 110.2 . . ? 
H36A C36 H36B 108.5 . . ? 
C36' O1' C25' 114.3(13) . . ? 
C36' O1' K1 116.7(10) . . ? 
C25' O1' K1 117.8(10) . . ? 
O1' C25' C26' 109.4(13) . . ? 
O1' C25' H25C 109.8 . . ? 
C26' C25' H25C 109.8 . . ? 
O1' C25' H25D 109.8 . . ? 
C26' C25' H25D 109.8 . . ? 
H25C C25' H25D 108.2 . . ? 
O2' C26' C25' 101.0(15) . . ? 
O2' C26' H26C 111.6 . . ? 
C25' C26' H26C 111.6 . . ? 
O2' C26' H26D 111.6 . . ? 
C25' C26' H26D 111.6 . . ? 
H26C C26' H26D 109.4 . . ? 
C27' O2' C26' 110.5(12) . . ? 
C27' O2' K1 110.8(9) . . ? 
C26' O2' K1 107.5(10) . . ? 
O2' C27' C28' 107.0(14) . . ? 
O2' C27' H27C 110.3 . . ? 
C28' C27' H27C 110.3 . . ? 
O2' C27' H27D 110.3 . . ? 
C28' C27' H27D 110.3 . . ? 
H27C C27' H27D 108.6 . . ? 
O3' C28' C27' 107.4(14) . . ? 
O3' C28' H28C 110.2 . . ? 
C27' C28' H28C 110.2 . . ? 
O3' C28' H28D 110.2 . . ? 
C27' C28' H28D 110.2 . . ? 
H28C C28' H28D 108.5 . . ? 
C28' O3' C29' 113.2(12) . . ? 
C28' O3' K1 118.3(10) . . ? 
C29' O3' K1 116.9(8) . . ? 
O3' C29' C30' 115.8(12) . . ? 
O3' C29' H29C 108.3 . . ? 
C30' C29' H29C 108.3 . . ? 
O3' C29' H29D 108.3 . . ? 
C30' C29' H29D 108.3 . . ? 
H29C C29' H29D 107.4 . . ? 
O4' C30' C29' 107.5(15) . . ? 
O4' C30' H30C 110.2 . . ? 
C29' C30' H30C 110.2 . . ? 
O4' C30' H30D 110.2 . . ? 
C29' C30' H30D 110.2 . . ? 
H30C C30' H30D 108.5 . . ? 
C30' O4' C31' 111.0(12) . . ? 
C30' O4' K1 114.2(11) . . ? 
C31' O4' K1 113.0(9) . . ? 
O4' C31' C32' 108.7(13) . . ? 
O4' C31' H31C 110.0 . . ? 
C32' C31' H31C 110.0 . . ? 
O4' C31' H31D 110.0 . . ? 
C32' C31' H31D 110.0 . . ? 
H31C C31' H31D 108.3 . . ? 
O5' C32' C31' 110.7(12) . . ? 
O5' C32' H32C 109.5 . . ? 
C31' C32' H32C 109.5 . . ? 
O5' C32' H32D 109.5 . . ? 
C31' C32' H32D 109.5 . . ? 
H32C C32' H32D 108.1 . . ? 
C33' O5' C32' 116.2(11) . . ? 
C33' O5' K1 117.6(8) . . ? 
C32' O5' K1 117.7(9) . . ? 
O5' C33' C34' 115.3(12) . . ? 
O5' C33' H33C 108.4 . . ? 
C34' C33' H33C 108.4 . . ? 
O5' C33' H33D 108.4 . . ? 
C34' C33' H33D 108.4 . . ? 
H33C C33' H33D 107.5 . . ? 
O6' C34' C33' 108.2(14) . . ? 
O6' C34' H34C 110.1 . . ? 
C33' C34' H34C 110.1 . . ? 
O6' C34' H34D 110.1 . . ? 
C33' C34' H34D 110.1 . . ? 
H34C C34' H34D 108.4 . . ? 
C35' O6' C34' 112.1(12) . . ? 
C35' O6' K1 114.2(10) . . ? 
C34' O6' K1 111.7(10) . . ? 
O6' C35' C36' 107.4(15) . . ? 
O6' C35' H35C 110.2 . . ? 
C36' C35' H35C 110.2 . . ? 
O6' C35' H35D 110.2 . . ? 
C36' C35' H35D 110.2 . . ? 
H35C C35' H35D 108.5 . . ? 
O1' C36' C35' 110.4(15) . . ? 
O1' C36' H36C 109.6 . . ? 
C35' C36' H36C 109.6 . . ? 
O1' C36' H36D 109.6 . . ? 
C35' C36' H36D 109.6 . . ? 
H36C C36' H36D 108.1 . . ? 
C2S O1S C3S 119.1(16) . . ? 
C2S C1S H1SA 109.5 . . ? 
C2S C1S H1SB 109.5 . . ? 
H1SA C1S H1SB 109.5 . . ? 
C2S C1S H1SC 109.5 . . ? 
H1SA C1S H1SC 109.5 . . ? 
H1SB C1S H1SC 109.5 . . ? 
O1S C2S C1S 109(3) . . ? 
O1S C2S H2SA 109.8 . . ? 
C1S C2S H2SA 109.8 . . ? 
O1S C2S H2SB 109.8 . . ? 
C1S C2S H2SB 109.8 . . ? 
H2SA C2S H2SB 108.2 . . ? 
O1S C3S C4S 112(3) . . ? 
O1S C3S H3SA 109.1 . . ? 
C4S C3S H3SA 109.1 . . ? 
O1S C3S H3SB 109.1 . . ? 
C4S C3S H3SB 109.1 . . ? 
H3SA C3S H3SB 107.8 . . ? 
C3S C4S H4SA 109.5 . . ? 
C3S C4S H4SB 109.5 . . ? 
H4SA C4S H4SB 109.5 . . ? 
C3S C4S H4SC 109.5 . . ? 
H4SA C4S H4SC 109.5 . . ? 
H4SB C4S H4SC 109.5 . . ? 
 
_diffrn_measured_fraction_theta_max    0.986 
_diffrn_reflns_theta_full              27.43 
_diffrn_measured_fraction_theta_full   0.986 
_refine_diff_density_max    0.538 
_refine_diff_density_min   -0.722 
_refine_diff_density_rms    0.112 


data_1b.2CN

_audit_creation_method            SHELXL-97
_chemical_name_systematic
;
 ?
;
_chemical_name_common             ?
_chemical_melting_point           ?
_chemical_formula_moiety          ?
_chemical_formula_sum
 'C68 H88 B2 F4 Fe K2 N2 O12'
_chemical_formula_weight          1357.07
 
loop_
 _atom_type_symbol
 _atom_type_description
 _atom_type_scat_dispersion_real
 _atom_type_scat_dispersion_imag
 _atom_type_scat_source
 'C'  'C'   0.0033   0.0016
 'International Tables Vol C Tables 4.2.6.8 and 6.1.1.4'
 'H'  'H'   0.0000   0.0000
 'International Tables Vol C Tables 4.2.6.8 and 6.1.1.4'
 'B'  'B'   0.0013   0.0007
 'International Tables Vol C Tables 4.2.6.8 and 6.1.1.4'
 'N'  'N'   0.0061   0.0033
 'International Tables Vol C Tables 4.2.6.8 and 6.1.1.4'
 'F'  'F'   0.0171   0.0103
 'International Tables Vol C Tables 4.2.6.8 and 6.1.1.4'
 'Fe'  'Fe'   0.3463   0.8444
 'International Tables Vol C Tables 4.2.6.8 and 6.1.1.4'
 'K'  'K'   0.2009   0.2494
 'International Tables Vol C Tables 4.2.6.8 and 6.1.1.4'
 'O'  'O'   0.0106   0.0060
 'International Tables Vol C Tables 4.2.6.8 and 6.1.1.4'
 
_symmetry_cell_setting            triclinic
_symmetry_space_group_name_H-M    P-1
 
loop_
 _symmetry_equiv_pos_as_xyz
 'x, y, z'
 '-x, -y, -z'
 
_cell_length_a                    11.0600(3)
_cell_length_b                    12.3916(2)
_cell_length_c                    14.0340(3)
_cell_angle_alpha                 64.5730(10)
_cell_angle_beta                  75.4720(10)
_cell_angle_gamma                 79.9570(10)
_cell_volume                      1676.62(6)
_cell_formula_units_Z             1
_cell_measurement_temperature     120(2)
_cell_measurement_reflns_used     7237
_cell_measurement_theta_min       2.910
_cell_measurement_theta_max       27.485
 
_exptl_crystal_description        'Cut Block'
_exptl_crystal_colour             'Light Yellow'
_exptl_crystal_size_max           0.09
_exptl_crystal_size_mid           0.06
_exptl_crystal_size_min           0.05
_exptl_crystal_density_meas       ?
_exptl_crystal_density_diffrn     1.344
_exptl_crystal_density_method     'not measured'
_exptl_crystal_F_000              716
_exptl_absorpt_coefficient_mu     0.422
_exptl_absorpt_correction_type    multi-scan
_exptl_absorpt_correction_T_min   0.9630
_exptl_absorpt_correction_T_max   0.9792
_exptl_absorpt_process_details       'SADABS 2007/2 (Sheldrick, G.M., 2007)'

_exptl_special_details
;
SADABS was used to perform the Absorption correction
Parameter refinement on 26963 reflections reduced R(int) from 0.0988 to 0.0562
Ratio of minimum to maximum apparent transmission: 0.805173
The given Tmin and Tmax were generated using the SHELX SIZE command
;

_diffrn_ambient_temperature           120(2)
_diffrn_radiation_wavelength           0.71073
_diffrn_radiation_type                      MoK\a
_diffrn_radiation_source                  'Bruker-Nonius FR591 rotating anode'
_diffrn_radiation_monochromator    '10cm confocal mirrors'
_diffrn_measurement_device_type   
'Bruker-Nonius APEX II CCD camera on \k-goniostat'
_diffrn_measurement_method          '\f & \w scans'
_diffrn_detector_area_resol_mean   '4096x4096pixels / 62x62mm'
_diffrn_standards_number          ?
_diffrn_standards_interval_count  ?
_diffrn_standards_interval_time   ?
_diffrn_standards_decay_%         ?
_diffrn_reflns_number             30041
_diffrn_reflns_av_R_equivalents   0.0532
_diffrn_reflns_av_sigmaI/netI     0.0449
_diffrn_reflns_limit_h_min        -14
_diffrn_reflns_limit_h_max        14
_diffrn_reflns_limit_k_min        -15
_diffrn_reflns_limit_k_max        16
_diffrn_reflns_limit_l_min        -18
_diffrn_reflns_limit_l_max        18
_diffrn_reflns_theta_min          3.00
_diffrn_reflns_theta_max          27.48
_reflns_number_total              7649
_reflns_number_gt                 6248
_reflns_threshold_expression      >2sigma(I)
 
_computing_data_collection        
'COLLECT (Hooft, R.W.W., 1998)'
_computing_cell_refinement        
'DENZO (Otwinowski & Minor, 1997) & COLLECT (Hooft, R.W.W., 1998)'
#Although determined using DirAx, the cell is refined in the HKL
#package during data reduction
_computing_data_reduction         
'DENZO (Otwinowski & Minor, 1997) & COLLECT (Hooft, R.W.W., 1998)' 
_computing_structure_solution     'SHELXS-97 (Sheldrick, 1997a)' 
_computing_structure_refinement   'SHELXL-97 (Sheldrick, 1997b)' 
_computing_molecular_graphics     'ORTEP3 for Windows (Farrugia, 1997)'
_computing_publication_material   'WinGX (Farrugia, 1999)'
 
_refine_special_details
;
 Refinement of F^2^ against ALL reflections.  The weighted R-factor wR and
 goodness of fit S are based on F^2^, conventional R-factors R are based
 on F, with F set to zero for negative F^2^. The threshold expression of
 F^2^ > 2sigma(F^2^) is used only for calculating R-factors(gt) etc. and is
 not relevant to the choice of reflections for refinement.  R-factors based
 on F^2^ are statistically about twice as large as those based on F, and R-
 factors based on ALL data will be even larger.
;
 
_refine_ls_structure_factor_coef  Fsqd
_refine_ls_matrix_type            full
_refine_ls_weighting_scheme       calc
_refine_ls_weighting_details
 'calc w=1/[\s^2^(Fo^2^)+(0.0557P)^2^+2.8877P] where P=(Fo^2^+2Fc^2^)/3'
_atom_sites_solution_primary      direct
_atom_sites_solution_secondary    difmap
_atom_sites_solution_hydrogens    geom
_refine_ls_hydrogen_treatment     constr
_refine_ls_extinction_method      none
_refine_ls_extinction_coef        ?
_refine_ls_number_reflns          7649
_refine_ls_number_parameters      416
_refine_ls_number_restraints      0
_refine_ls_R_factor_all           0.0816
_refine_ls_R_factor_gt            0.0640
_refine_ls_wR_factor_ref          0.1666
_refine_ls_wR_factor_gt           0.1554
_refine_ls_goodness_of_fit_ref    1.187
_refine_ls_restrained_S_all       1.187
_refine_ls_shift/su_max           0.000
_refine_ls_shift/su_mean          0.000
 
loop_
 _atom_site_label
 _atom_site_type_symbol
 _atom_site_fract_x
 _atom_site_fract_y
 _atom_site_fract_z
 _atom_site_U_iso_or_equiv
 _atom_site_adp_type
 _atom_site_occupancy
 _atom_site_symmetry_multiplicity
 _atom_site_calc_flag
 _atom_site_refinement_flags
 _atom_site_disorder_assembly
 _atom_site_disorder_group
K1 K 0.20802(6) 0.46357(6) 0.87284(5) 0.02514(16) Uani 1 1 d . . .
C1 C 0.4491(3) 0.0579(3) 0.8491(2) 0.0204(6) Uani 1 1 d . . .
C2 C 0.4975(3) -0.0648(3) 0.8892(2) 0.0228(6) Uani 1 1 d . . .
H2 H 0.5690 -0.0973 0.8534 0.027 Uiso 1 1 calc R . .
C3 C 0.4229(3) -0.1311(3) 0.9905(2) 0.0252(6) Uani 1 1 d . . .
H3 H 0.4348 -0.2144 1.0329 0.030 Uiso 1 1 calc R . .
C4 C 0.3273(3) -0.0499(3) 1.0169(2) 0.0236(6) Uani 1 1 d . . .
H4 H 0.2634 -0.0690 1.0799 0.028 Uiso 1 1 calc R . .
C5 C 0.3451(3) 0.0654(3) 0.9315(2) 0.0223(6) Uani 1 1 d . . .
H5 H 0.2953 0.1368 0.9294 0.027 Uiso 1 1 calc R . .
C6 C 0.4638(3) 0.2842(3) 0.7584(2) 0.0214(6) Uani 1 1 d . . .
C7 C 0.4102(3) 0.2021(3) 0.6379(2) 0.0207(6) Uani 1 1 d . . .
C8 C 0.4468(3) 0.3005(3) 0.5379(2) 0.0228(6) Uani 1 1 d . . .
C9 C 0.3777(3) 0.3440(3) 0.4565(2) 0.0283(7) Uani 1 1 d . . .
H9 H 0.4028 0.4107 0.3912 0.034 Uiso 1 1 calc R . .
C10 C 0.2736(3) 0.2891(3) 0.4723(3) 0.0319(7) Uani 1 1 d . . .
C11 C 0.2343(3) 0.1923(3) 0.5648(3) 0.0296(7) Uani 1 1 d . . .
H11 H 0.1622 0.1551 0.5725 0.036 Uiso 1 1 calc R . .
C12 C 0.3018(3) 0.1487(3) 0.6482(2) 0.0243(6) Uani 1 1 d . . .
C13 C 0.5643(3) 0.3629(3) 0.5122(2) 0.0259(6) Uani 1 1 d . . .
H13A H 0.5712 0.4289 0.4407 0.039 Uiso 1 1 calc R . .
H13B H 0.6377 0.3055 0.5133 0.039 Uiso 1 1 calc R . .
H13C H 0.5600 0.3946 0.5661 0.039 Uiso 1 1 calc R . .
C14 C 0.2474(3) 0.0430(3) 0.7478(3) 0.0276(6) Uani 1 1 d . . .
H14A H 0.2053 0.0701 0.8048 0.041 Uiso 1 1 calc R . .
H14B H 0.3150 -0.0181 0.7725 0.041 Uiso 1 1 calc R . .
H14C H 0.1869 0.0089 0.7301 0.041 Uiso 1 1 calc R . .
C15 C 0.6450(3) 0.1312(2) 0.6891(2) 0.0192(5) Uani 1 1 d . . .
C16 C 0.7478(3) 0.1791(3) 0.6963(2) 0.0210(6) Uani 1 1 d . . .
C17 C 0.8715(3) 0.1350(3) 0.6690(2) 0.0232(6) Uani 1 1 d . . .
H17 H 0.9395 0.1663 0.6764 0.028 Uiso 1 1 calc R . .
C18 C 0.8933(3) 0.0471(3) 0.6317(2) 0.0229(6) Uani 1 1 d . . .
C19 C 0.7984(3) 0.0004(3) 0.6187(2) 0.0221(6) Uani 1 1 d . . .
H19 H 0.8164 -0.0593 0.5906 0.027 Uiso 1 1 calc R . .
C20 C 0.6744(3) 0.0417(2) 0.6471(2) 0.0207(6) Uani 1 1 d . . .
C21 C 0.7345(3) 0.2829(3) 0.7291(3) 0.0260(6) Uani 1 1 d . . .
H21A H 0.8165 0.2954 0.7361 0.039 Uiso 1 1 calc R . .
H21B H 0.6760 0.2648 0.7983 0.039 Uiso 1 1 calc R . .
H21C H 0.7026 0.3557 0.6742 0.039 Uiso 1 1 calc R . .
C22 C 0.5769(3) -0.0133(3) 0.6270(3) 0.0262(6) Uani 1 1 d . . .
H22A H 0.5500 0.0422 0.5599 0.039 Uiso 1 1 calc R . .
H22B H 0.5047 -0.0288 0.6869 0.039 Uiso 1 1 calc R . .
H22C H 0.6128 -0.0888 0.6211 0.039 Uiso 1 1 calc R . .
B1 B 0.4955(3) 0.1653(3) 0.7319(2) 0.0188(6) Uani 1 1 d . . .
N1 N 0.4253(3) 0.3647(2) 0.7806(2) 0.0282(6) Uani 1 1 d . . .
F1 F 0.2049(2) 0.3309(2) 0.39238(16) 0.0482(6) Uani 1 1 d . . .
F2 F 1.01423(17) 0.00376(17) 0.60643(15) 0.0326(4) Uani 1 1 d . . .
Fe1 Fe 0.5000 0.0000 1.0000 0.01917(15) Uani 1 2 d S . .
C31 C 0.0173(4) 0.2090(3) 1.0535(3) 0.0395(8) Uani 1 1 d . . .
H31A H -0.0035 0.1272 1.0708 0.047 Uiso 1 1 calc R . .
H31B H -0.0612 0.2564 1.0684 0.047 Uiso 1 1 calc R . .
C32 C 0.1060(4) 0.2033(3) 1.1204(3) 0.0371(8) Uani 1 1 d . . .
H32A H 0.0688 0.1623 1.1977 0.044 Uiso 1 1 calc R . .
H32B H 0.1849 0.1570 1.1042 0.044 Uiso 1 1 calc R . .
C33 C 0.2182(4) 0.3189(3) 1.1579(3) 0.0361(8) Uani 1 1 d . . .
H33A H 0.2968 0.2727 1.1410 0.043 Uiso 1 1 calc R . .
H33B H 0.1830 0.2789 1.2358 0.043 Uiso 1 1 calc R . .
C34 C 0.2448(4) 0.4445(3) 1.1308(3) 0.0362(8) Uani 1 1 d . . .
H34A H 0.1655 0.4928 1.1418 0.043 Uiso 1 1 calc R . .
H34B H 0.2983 0.4440 1.1779 0.043 Uiso 1 1 calc R . .
C35 C 0.3530(3) 0.6074(3) 0.9923(3) 0.0344(7) Uani 1 1 d . . .
H35A H 0.4226 0.5959 1.0293 0.041 Uiso 1 1 calc R . .
H35B H 0.2855 0.6606 1.0147 0.041 Uiso 1 1 calc R . .
C36 C 0.3980(3) 0.6629(3) 0.8738(3) 0.0366(8) Uani 1 1 d . . .
H36A H 0.4378 0.7375 0.8532 0.044 Uiso 1 1 calc R . .
H36B H 0.4610 0.6072 0.8506 0.044 Uiso 1 1 calc R . .
C37 C 0.3264(4) 0.7514(3) 0.7092(3) 0.0394(9) Uani 1 1 d . . .
H37A H 0.3972 0.7064 0.6796 0.047 Uiso 1 1 calc R . .
H37B H 0.3525 0.8316 0.6908 0.047 Uiso 1 1 calc R . .
C38 C 0.2166(4) 0.7638(3) 0.6623(3) 0.0436(9) Uani 1 1 d . . .
H38A H 0.1435 0.8023 0.6966 0.052 Uiso 1 1 calc R . .
H38B H 0.2346 0.8146 0.5842 0.052 Uiso 1 1 calc R . .
C39 C 0.1011(4) 0.6494(4) 0.6226(3) 0.0472(10) Uani 1 1 d . . .
H39A H 0.1236 0.7055 0.5462 0.057 Uiso 1 1 calc R . .
H39B H 0.0169 0.6761 0.6535 0.057 Uiso 1 1 calc R . .
C40 C 0.1014(4) 0.5254(4) 0.6308(3) 0.0495(11) Uani 1 1 d . . .
H40A H 0.0458 0.5247 0.5857 0.059 Uiso 1 1 calc R . .
H40B H 0.1872 0.4969 0.6045 0.059 Uiso 1 1 calc R . .
C41 C 0.0750(3) 0.3253(4) 0.7586(3) 0.0392(9) Uani 1 1 d . . .
H41A H 0.1654 0.2994 0.7473 0.047 Uiso 1 1 calc R . .
H41B H 0.0374 0.3128 0.7074 0.047 Uiso 1 1 calc R . .
C42 C 0.0124(3) 0.2537(3) 0.8719(3) 0.0368(8) Uani 1 1 d . . .
H42A H -0.0764 0.2843 0.8851 0.044 Uiso 1 1 calc R . .
H42B H 0.0148 0.1686 0.8841 0.044 Uiso 1 1 calc R . .
O31 O 0.0766(2) 0.2640(2) 0.94309(19) 0.0308(5) Uani 1 1 d . . .
O32 O 0.1315(2) 0.32199(19) 1.09741(17) 0.0307(5) Uani 1 1 d . . .
O33 O 0.3072(2) 0.4949(2) 1.02104(18) 0.0315(5) Uani 1 1 d . . .
O34 O 0.2935(2) 0.6889(2) 0.82325(18) 0.0315(5) Uani 1 1 d . . .
O35 O 0.1898(2) 0.6475(2) 0.68011(18) 0.0338(5) Uani 1 1 d . . .
O36 O 0.0585(2) 0.4479(2) 0.74087(19) 0.0357(5) Uani 1 1 d . . .
 
loop_
 _atom_site_aniso_label
 _atom_site_aniso_U_11
 _atom_site_aniso_U_22
 _atom_site_aniso_U_33
 _atom_site_aniso_U_23
 _atom_site_aniso_U_13
 _atom_site_aniso_U_12
K1 0.0301(4) 0.0247(3) 0.0205(3) -0.0086(2) -0.0047(2) -0.0038(2)
C1 0.0222(14) 0.0231(14) 0.0195(13) -0.0104(11) -0.0057(11) -0.0032(11)
C2 0.0256(15) 0.0244(14) 0.0231(14) -0.0128(12) -0.0072(11) -0.0019(11)
C3 0.0365(17) 0.0200(14) 0.0246(15) -0.0111(12) -0.0090(12) -0.0056(12)
C4 0.0255(15) 0.0276(15) 0.0221(14) -0.0127(12) -0.0043(11) -0.0064(12)
C5 0.0200(14) 0.0272(15) 0.0216(14) -0.0116(12) -0.0039(11) -0.0019(11)
C6 0.0212(14) 0.0246(14) 0.0164(13) -0.0062(11) -0.0036(10) -0.0025(11)
C7 0.0188(14) 0.0249(14) 0.0215(13) -0.0146(11) -0.0027(10) 0.0022(11)
C8 0.0215(14) 0.0263(14) 0.0228(14) -0.0134(12) -0.0050(11) 0.0026(11)
C9 0.0288(17) 0.0341(16) 0.0212(14) -0.0123(13) -0.0049(12) 0.0028(13)
C10 0.0272(17) 0.051(2) 0.0240(15) -0.0203(15) -0.0115(12) 0.0046(14)
C11 0.0186(15) 0.049(2) 0.0284(16) -0.0227(15) -0.0050(12) -0.0016(13)
C12 0.0220(15) 0.0337(16) 0.0238(14) -0.0190(13) -0.0041(11) 0.0002(12)
C13 0.0290(16) 0.0249(14) 0.0204(14) -0.0063(12) -0.0046(11) -0.0015(12)
C14 0.0214(15) 0.0371(17) 0.0301(16) -0.0165(14) -0.0059(12) -0.0071(12)
C15 0.0218(14) 0.0200(13) 0.0134(12) -0.0044(10) -0.0042(10) -0.0012(10)
C16 0.0239(15) 0.0220(13) 0.0136(12) -0.0037(10) -0.0041(10) -0.0019(11)
C17 0.0196(14) 0.0267(14) 0.0187(13) -0.0030(11) -0.0061(11) -0.0036(11)
C18 0.0194(14) 0.0247(14) 0.0174(13) -0.0035(11) -0.0019(10) 0.0006(11)
C19 0.0277(15) 0.0198(13) 0.0152(13) -0.0061(11) -0.0020(11) 0.0009(11)
C20 0.0237(15) 0.0212(13) 0.0142(12) -0.0040(10) -0.0034(10) -0.0033(11)
C21 0.0250(16) 0.0278(15) 0.0276(15) -0.0109(13) -0.0077(12) -0.0050(12)
C22 0.0259(16) 0.0291(15) 0.0293(15) -0.0178(13) -0.0042(12) -0.0023(12)
B1 0.0186(15) 0.0206(14) 0.0187(14) -0.0099(12) -0.0023(11) -0.0021(11)
N1 0.0325(15) 0.0259(13) 0.0266(13) -0.0124(11) -0.0045(11) 0.0000(11)
F1 0.0393(12) 0.0795(17) 0.0281(11) -0.0174(11) -0.0177(9) -0.0059(11)
F2 0.0210(9) 0.0365(10) 0.0362(10) -0.0144(8) -0.0028(7) 0.0032(7)
Fe1 0.0223(3) 0.0193(3) 0.0182(3) -0.0092(2) -0.0046(2) -0.0021(2)
C31 0.0356(19) 0.0326(18) 0.043(2) -0.0097(16) 0.0008(15) -0.0118(14)
C32 0.043(2) 0.0263(16) 0.0316(18) -0.0029(14) -0.0026(15) -0.0068(14)
C33 0.045(2) 0.0382(19) 0.0235(16) -0.0100(14) -0.0119(14) 0.0007(15)
C34 0.046(2) 0.0418(19) 0.0248(16) -0.0178(15) -0.0071(14) -0.0006(15)
C35 0.0355(19) 0.0349(18) 0.044(2) -0.0239(16) -0.0124(15) -0.0019(14)
C36 0.0300(18) 0.0334(18) 0.052(2) -0.0230(16) -0.0032(15) -0.0071(14)
C37 0.051(2) 0.0278(17) 0.0348(19) -0.0138(15) 0.0089(16) -0.0129(15)
C38 0.060(3) 0.0266(17) 0.0259(17) -0.0014(14) 0.0003(16) 0.0033(16)
C39 0.035(2) 0.065(3) 0.0282(18) -0.0020(17) -0.0127(15) -0.0042(18)
C40 0.039(2) 0.089(3) 0.0234(17) -0.0208(19) -0.0056(15) -0.017(2)
C41 0.0260(17) 0.065(2) 0.046(2) -0.041(2) -0.0038(15) -0.0070(16)
C42 0.0263(17) 0.0421(19) 0.054(2) -0.0306(18) -0.0061(15) -0.0055(14)
O31 0.0278(12) 0.0310(12) 0.0351(12) -0.0143(10) -0.0046(9) -0.0061(9)
O32 0.0384(13) 0.0267(11) 0.0231(11) -0.0060(9) -0.0063(9) -0.0030(9)
O33 0.0388(13) 0.0323(12) 0.0295(12) -0.0181(10) -0.0043(10) -0.0060(10)
O34 0.0331(13) 0.0293(12) 0.0281(12) -0.0113(9) 0.0027(9) -0.0058(9)
O35 0.0314(13) 0.0356(13) 0.0256(11) -0.0035(10) -0.0078(9) -0.0008(10)
O36 0.0306(13) 0.0517(15) 0.0282(12) -0.0198(11) -0.0052(9) -0.0028(11)
 
_geom_special_details
;
 All esds (except the esd in the dihedral angle between two l.s. planes)
 are estimated using the full covariance matrix.  The cell esds are taken
 into account individually in the estimation of esds in distances, angles
 and torsion angles; correlations between esds in cell parameters are only
 used when they are defined by crystal symmetry.  An approximate (isotropic)
 treatment of cell esds is used for estimating esds involving l.s. planes.
;
 
loop_
 _geom_bond_atom_site_label_1
 _geom_bond_atom_site_label_2
 _geom_bond_distance
 _geom_bond_site_symmetry_2
 _geom_bond_publ_flag
K1 O35 2.715(2) . ?
K1 O31 2.765(2) . ?
K1 O33 2.769(2) . ?
K1 N1 2.780(3) . ?
K1 O34 2.846(2) . ?
K1 O32 2.856(2) . ?
K1 O36 2.856(2) . ?
C1 C2 1.432(4) . ?
C1 C5 1.434(4) . ?
C1 B1 1.636(4) . ?
C1 Fe1 2.114(3) . ?
C2 C3 1.422(4) . ?
C2 Fe1 2.040(3) . ?
C2 H2 0.9500 . ?
C3 C4 1.421(4) . ?
C3 Fe1 2.027(3) . ?
C3 H3 0.9500 . ?
C4 C5 1.423(4) . ?
C4 Fe1 2.036(3) . ?
C4 H4 0.9500 . ?
C5 Fe1 2.047(3) . ?
C5 H5 0.9500 . ?
C6 N1 1.151(4) . ?
C6 B1 1.630(4) . ?
C7 C12 1.414(4) . ?
C7 C8 1.428(4) . ?
C7 B1 1.673(4) . ?
C8 C9 1.395(4) . ?
C8 C13 1.514(4) . ?
C9 C10 1.361(5) . ?
C9 H9 0.9500 . ?
C10 C11 1.368(5) . ?
C10 F1 1.377(4) . ?
C11 C12 1.406(4) . ?
C11 H11 0.9500 . ?
C12 C14 1.520(4) . ?
C13 H13A 0.9800 . ?
C13 H13B 0.9800 . ?
C13 H13C 0.9800 . ?
C14 H14A 0.9800 . ?
C14 H14B 0.9800 . ?
C14 H14C 0.9800 . ?
C15 C16 1.415(4) . ?
C15 C20 1.422(4) . ?
C15 B1 1.658(4) . ?
C16 C17 1.404(4) . ?
C16 C21 1.515(4) . ?
C17 C18 1.361(4) . ?
C17 H17 0.9500 . ?
C18 C19 1.367(4) . ?
C18 F2 1.370(3) . ?
C19 C20 1.399(4) . ?
C19 H19 0.9500 . ?
C20 C22 1.510(4) . ?
C21 H21A 0.9800 . ?
C21 H21B 0.9800 . ?
C21 H21C 0.9800 . ?
C22 H22A 0.9800 . ?
C22 H22B 0.9800 . ?
C22 H22C 0.9800 . ?
Fe1 C3 2.027(3) 2_657 ?
Fe1 C4 2.036(3) 2_657 ?
Fe1 C2 2.040(3) 2_657 ?
Fe1 C5 2.047(3) 2_657 ?
Fe1 C1 2.114(3) 2_657 ?
C31 O31 1.427(4) . ?
C31 C32 1.493(5) . ?
C31 H31A 0.9900 . ?
C31 H31B 0.9900 . ?
C32 O32 1.428(4) . ?
C32 H32A 0.9900 . ?
C32 H32B 0.9900 . ?
C33 O32 1.418(4) . ?
C33 C34 1.500(5) . ?
C33 H33A 0.9900 . ?
C33 H33B 0.9900 . ?
C34 O33 1.424(4) . ?
C34 H34A 0.9900 . ?
C34 H34B 0.9900 . ?
C35 O33 1.422(4) . ?
C35 C36 1.486(5) . ?
C35 H35A 0.9900 . ?
C35 H35B 0.9900 . ?
C36 O34 1.424(4) . ?
C36 H36A 0.9900 . ?
C36 H36B 0.9900 . ?
C37 O34 1.427(4) . ?
C37 C38 1.476(6) . ?
C37 H37A 0.9900 . ?
C37 H37B 0.9900 . ?
C38 O35 1.425(4) . ?
C38 H38A 0.9900 . ?
C38 H38B 0.9900 . ?
C39 O35 1.410(4) . ?
C39 C40 1.490(6) . ?
C39 H39A 0.9900 . ?
C39 H39B 0.9900 . ?
C40 O36 1.432(4) . ?
C40 H40A 0.9900 . ?
C40 H40B 0.9900 . ?
C41 O36 1.416(5) . ?
C41 C42 1.499(5) . ?
C41 H41A 0.9900 . ?
C41 H41B 0.9900 . ?
C42 O31 1.419(4) . ?
C42 H42A 0.9900 . ?
C42 H42B 0.9900 . ?
 
loop_
 _geom_angle_atom_site_label_1
 _geom_angle_atom_site_label_2
 _geom_angle_atom_site_label_3
 _geom_angle
 _geom_angle_site_symmetry_1
 _geom_angle_site_symmetry_3
 _geom_angle_publ_flag
O35 K1 O31 119.77(8) . . ?
O35 K1 O33 120.41(8) . . ?
O31 K1 O33 118.12(7) . . ?
O35 K1 N1 91.41(8) . . ?
O31 K1 N1 94.04(8) . . ?
O33 K1 N1 97.59(8) . . ?
O35 K1 O34 60.52(7) . . ?
O31 K1 O34 167.28(7) . . ?
O33 K1 O34 59.90(7) . . ?
N1 K1 O34 98.68(7) . . ?
O35 K1 O32 156.12(7) . . ?
O31 K1 O32 59.24(7) . . ?
O33 K1 O32 60.16(7) . . ?
N1 K1 O32 112.42(7) . . ?
O34 K1 O32 114.70(7) . . ?
O35 K1 O36 59.98(7) . . ?
O31 K1 O36 59.81(7) . . ?
O33 K1 O36 168.30(7) . . ?
N1 K1 O36 94.07(8) . . ?
O34 K1 O36 119.21(8) . . ?
O32 K1 O36 114.19(7) . . ?
C2 C1 C5 105.0(2) . . ?
C2 C1 B1 127.9(2) . . ?
C5 C1 B1 127.0(3) . . ?
C2 C1 Fe1 67.11(16) . . ?
C5 C1 Fe1 67.34(16) . . ?
B1 C1 Fe1 132.3(2) . . ?
C3 C2 C1 110.0(3) . . ?
C3 C2 Fe1 69.02(16) . . ?
C1 C2 Fe1 72.62(16) . . ?
C3 C2 H2 125.0 . . ?
C1 C2 H2 125.0 . . ?
Fe1 C2 H2 124.9 . . ?
C4 C3 C2 107.5(3) . . ?
C4 C3 Fe1 69.87(17) . . ?
C2 C3 Fe1 70.06(17) . . ?
C4 C3 H3 126.2 . . ?
C2 C3 H3 126.2 . . ?
Fe1 C3 H3 125.4 . . ?
C3 C4 C5 107.3(3) . . ?
C3 C4 Fe1 69.19(17) . . ?
C5 C4 Fe1 70.02(17) . . ?
C3 C4 H4 126.3 . . ?
C5 C4 H4 126.3 . . ?
Fe1 C4 H4 126.0 . . ?
C4 C5 C1 110.0(3) . . ?
C4 C5 Fe1 69.19(17) . . ?
C1 C5 Fe1 72.39(17) . . ?
C4 C5 H5 125.0 . . ?
C1 C5 H5 125.0 . . ?
Fe1 C5 H5 125.0 . . ?
N1 C6 B1 171.0(3) . . ?
C12 C7 C8 116.0(3) . . ?
C12 C7 B1 126.8(3) . . ?
C8 C7 B1 117.1(2) . . ?
C9 C8 C7 122.0(3) . . ?
C9 C8 C13 115.6(3) . . ?
C7 C8 C13 122.4(3) . . ?
C10 C9 C8 118.8(3) . . ?
C10 C9 H9 120.6 . . ?
C8 C9 H9 120.6 . . ?
C9 C10 C11 122.6(3) . . ?
C9 C10 F1 119.3(3) . . ?
C11 C10 F1 118.1(3) . . ?
C10 C11 C12 119.2(3) . . ?
C10 C11 H11 120.4 . . ?
C12 C11 H11 120.4 . . ?
C11 C12 C7 121.3(3) . . ?
C11 C12 C14 114.4(3) . . ?
C7 C12 C14 124.3(3) . . ?
C8 C13 H13A 109.5 . . ?
C8 C13 H13B 109.5 . . ?
H13A C13 H13B 109.5 . . ?
C8 C13 H13C 109.5 . . ?
H13A C13 H13C 109.5 . . ?
H13B C13 H13C 109.5 . . ?
C12 C14 H14A 109.5 . . ?
C12 C14 H14B 109.5 . . ?
H14A C14 H14B 109.5 . . ?
C12 C14 H14C 109.5 . . ?
H14A C14 H14C 109.5 . . ?
H14B C14 H14C 109.5 . . ?
C16 C15 C20 116.3(3) . . ?
C16 C15 B1 125.3(2) . . ?
C20 C15 B1 118.3(2) . . ?
C17 C16 C15 121.2(3) . . ?
C17 C16 C21 115.3(3) . . ?
C15 C16 C21 123.5(3) . . ?
C18 C17 C16 119.6(3) . . ?
C18 C17 H17 120.2 . . ?
C16 C17 H17 120.2 . . ?
C17 C18 C19 122.1(3) . . ?
C17 C18 F2 119.1(3) . . ?
C19 C18 F2 118.8(3) . . ?
C18 C19 C20 119.2(3) . . ?
C18 C19 H19 120.4 . . ?
C20 C19 H19 120.4 . . ?
C19 C20 C15 121.5(3) . . ?
C19 C20 C22 115.0(3) . . ?
C15 C20 C22 123.4(3) . . ?
C16 C21 H21A 109.5 . . ?
C16 C21 H21B 109.5 . . ?
H21A C21 H21B 109.5 . . ?
C16 C21 H21C 109.5 . . ?
H21A C21 H21C 109.5 . . ?
H21B C21 H21C 109.5 . . ?
C20 C22 H22A 109.5 . . ?
C20 C22 H22B 109.5 . . ?
H22A C22 H22B 109.5 . . ?
C20 C22 H22C 109.5 . . ?
H22A C22 H22C 109.5 . . ?
H22B C22 H22C 109.5 . . ?
C6 B1 C1 102.6(2) . . ?
C6 B1 C15 116.8(2) . . ?
C1 B1 C15 107.5(2) . . ?
C6 B1 C7 100.4(2) . . ?
C1 B1 C7 117.4(2) . . ?
C15 B1 C7 112.1(2) . . ?
C6 N1 K1 142.3(2) . . ?
C3 Fe1 C3 180.000(1) 2_657 . ?
C3 Fe1 C4 40.93(12) 2_657 2_657 ?
C3 Fe1 C4 139.07(12) . 2_657 ?
C3 Fe1 C4 139.07(12) 2_657 . ?
C3 Fe1 C4 40.93(12) . . ?
C4 Fe1 C4 180.00(17) 2_657 . ?
C3 Fe1 C2 139.08(12) 2_657 . ?
C3 Fe1 C2 40.92(12) . . ?
C4 Fe1 C2 111.54(12) 2_657 . ?
C4 Fe1 C2 68.46(12) . . ?
C3 Fe1 C2 40.92(12) 2_657 2_657 ?
C3 Fe1 C2 139.08(12) . 2_657 ?
C4 Fe1 C2 68.46(12) 2_657 2_657 ?
C4 Fe1 C2 111.54(12) . 2_657 ?
C2 Fe1 C2 180.0 . 2_657 ?
C3 Fe1 C5 68.42(12) 2_657 2_657 ?
C3 Fe1 C5 111.58(12) . 2_657 ?
C4 Fe1 C5 40.79(12) 2_657 2_657 ?
C4 Fe1 C5 139.21(12) . 2_657 ?
C2 Fe1 C5 112.42(12) . 2_657 ?
C2 Fe1 C5 67.58(12) 2_657 2_657 ?
C3 Fe1 C5 111.58(12) 2_657 . ?
C3 Fe1 C5 68.42(12) . . ?
C4 Fe1 C5 139.21(12) 2_657 . ?
C4 Fe1 C5 40.79(12) . . ?
C2 Fe1 C5 67.58(12) . . ?
C2 Fe1 C5 112.42(12) 2_657 . ?
C5 Fe1 C5 180.0 2_657 . ?
C3 Fe1 C1 68.71(11) 2_657 2_657 ?
C3 Fe1 C1 111.29(11) . 2_657 ?
C4 Fe1 C1 68.64(11) 2_657 2_657 ?
C4 Fe1 C1 111.36(11) . 2_657 ?
C2 Fe1 C1 139.73(11) . 2_657 ?
C2 Fe1 C1 40.27(11) 2_657 2_657 ?
C5 Fe1 C1 40.27(11) 2_657 2_657 ?
C5 Fe1 C1 139.73(11) . 2_657 ?
C3 Fe1 C1 111.29(11) 2_657 . ?
C3 Fe1 C1 68.71(11) . . ?
C4 Fe1 C1 111.36(11) 2_657 . ?
C4 Fe1 C1 68.64(11) . . ?
C2 Fe1 C1 40.27(11) . . ?
C2 Fe1 C1 139.73(11) 2_657 . ?
C5 Fe1 C1 139.73(11) 2_657 . ?
C5 Fe1 C1 40.27(11) . . ?
C1 Fe1 C1 180.000(1) 2_657 . ?
O31 C31 C32 107.9(3) . . ?
O31 C31 H31A 110.1 . . ?
C32 C31 H31A 110.1 . . ?
O31 C31 H31B 110.1 . . ?
C32 C31 H31B 110.1 . . ?
H31A C31 H31B 108.4 . . ?
O32 C32 C31 109.4(3) . . ?
O32 C32 H32A 109.8 . . ?
C31 C32 H32A 109.8 . . ?
O32 C32 H32B 109.8 . . ?
C31 C32 H32B 109.8 . . ?
H32A C32 H32B 108.2 . . ?
O32 C33 C34 109.3(3) . . ?
O32 C33 H33A 109.8 . . ?
C34 C33 H33A 109.8 . . ?
O32 C33 H33B 109.8 . . ?
C34 C33 H33B 109.8 . . ?
H33A C33 H33B 108.3 . . ?
O33 C34 C33 108.3(3) . . ?
O33 C34 H34A 110.0 . . ?
C33 C34 H34A 110.0 . . ?
O33 C34 H34B 110.0 . . ?
C33 C34 H34B 110.0 . . ?
H34A C34 H34B 108.4 . . ?
O33 C35 C36 109.0(3) . . ?
O33 C35 H35A 109.9 . . ?
C36 C35 H35A 109.9 . . ?
O33 C35 H35B 109.9 . . ?
C36 C35 H35B 109.9 . . ?
H35A C35 H35B 108.3 . . ?
O34 C36 C35 108.5(3) . . ?
O34 C36 H36A 110.0 . . ?
C35 C36 H36A 110.0 . . ?
O34 C36 H36B 110.0 . . ?
C35 C36 H36B 110.0 . . ?
H36A C36 H36B 108.4 . . ?
O34 C37 C38 108.8(3) . . ?
O34 C37 H37A 109.9 . . ?
C38 C37 H37A 109.9 . . ?
O34 C37 H37B 109.9 . . ?
C38 C37 H37B 109.9 . . ?
H37A C37 H37B 108.3 . . ?
O35 C38 C37 108.5(3) . . ?
O35 C38 H38A 110.0 . . ?
C37 C38 H38A 110.0 . . ?
O35 C38 H38B 110.0 . . ?
C37 C38 H38B 110.0 . . ?
H38A C38 H38B 108.4 . . ?
O35 C39 C40 107.6(3) . . ?
O35 C39 H39A 110.2 . . ?
C40 C39 H39A 110.2 . . ?
O35 C39 H39B 110.2 . . ?
C40 C39 H39B 110.2 . . ?
H39A C39 H39B 108.5 . . ?
O36 C40 C39 109.1(3) . . ?
O36 C40 H40A 109.9 . . ?
C39 C40 H40A 109.9 . . ?
O36 C40 H40B 109.9 . . ?
C39 C40 H40B 109.9 . . ?
H40A C40 H40B 108.3 . . ?
O36 C41 C42 108.4(3) . . ?
O36 C41 H41A 110.0 . . ?
C42 C41 H41A 110.0 . . ?
O36 C41 H41B 110.0 . . ?
C42 C41 H41B 110.0 . . ?
H41A C41 H41B 108.4 . . ?
O31 C42 C41 108.5(3) . . ?
O31 C42 H42A 110.0 . . ?
C41 C42 H42A 110.0 . . ?
O31 C42 H42B 110.0 . . ?
C41 C42 H42B 110.0 . . ?
H42A C42 H42B 108.4 . . ?
C42 O31 C31 113.3(3) . . ?
C42 O31 K1 118.9(2) . . ?
C31 O31 K1 119.8(2) . . ?
C33 O32 C32 110.5(3) . . ?
C33 O32 K1 112.22(19) . . ?
C32 O32 K1 113.33(19) . . ?
C35 O33 C34 112.3(3) . . ?
C35 O33 K1 118.69(19) . . ?
C34 O33 K1 117.1(2) . . ?
C36 O34 C37 112.3(3) . . ?
C36 O34 K1 106.07(18) . . ?
C37 O34 K1 109.11(19) . . ?
C39 O35 C38 113.5(3) . . ?
C39 O35 K1 120.4(2) . . ?
C38 O35 K1 118.8(2) . . ?
C41 O36 C40 112.7(3) . . ?
C41 O36 K1 103.79(19) . . ?
C40 O36 K1 109.8(2) . . ?
 
_diffrn_measured_fraction_theta_max    0.994
_diffrn_reflns_theta_full              27.48
_diffrn_measured_fraction_theta_full   0.994
_refine_diff_density_max    1.158
_refine_diff_density_min   -0.654
_refine_diff_density_rms    0.100


data_K18c6fcBMes2FSiMe2OH
_audit_creation_date        "2012-10-05"
_audit_creation_method CRYSTALS_ver_14.52

_oxford_structure_analysis_title  '013mk12 At 8:19 on 5/10'
_chemical_name_systematic         .
_chemical_melting_point           .
 

_cell_length_a                    12.4769(2)
_cell_length_b                    14.4345(2)
_cell_length_c                    24.4216(4)
_cell_angle_alpha                 90
_cell_angle_beta                  92.3848(5)
_cell_angle_gamma                 90
_cell_volume                      4394.47(12)
 
_symmetry_cell_setting            'monoclinic' 
_symmetry_space_group_name_H-M    'P 21/c ' 
_symmetry_space_group_name_Hall   '-P 2ybc' 
loop_
 _symmetry_equiv_pos_as_xyz
 'x,y,z'
 '-x,-y,-z'
 'x,-y+1/2,z+1/2'
 '-x,y+1/2,-z+1/2'

loop_
_atom_type_symbol
_atom_type_scat_dispersion_real
_atom_type_scat_dispersion_imag
_atom_type_scat_Cromer_Mann_a1
_atom_type_scat_Cromer_Mann_b1
_atom_type_scat_Cromer_Mann_a2
_atom_type_scat_Cromer_Mann_b2
_atom_type_scat_Cromer_Mann_a3
_atom_type_scat_Cromer_Mann_b3
_atom_type_scat_Cromer_Mann_a4
_atom_type_scat_Cromer_Mann_b4
_atom_type_scat_Cromer_Mann_c
_atom_type_scat_source  
 C       0.0033   0.0016   2.3100  20.8439   1.0200  10.2075   1.5886   0.5687
   0.8650  51.6512   0.2156 'International Tables Vol C 4.2.6.8 and 6.1.1.4'
 H       0.0000   0.0000   0.4930  10.5109   0.3229  26.1257   0.1402   3.1424
   0.0408  57.7998   0.0030 'International Tables Vol C 4.2.6.8 and 6.1.1.4'
 O       0.0106   0.0060   3.0485  13.2771   2.2868   5.7011   1.5463   0.3239
   0.8670  32.9089   0.2508 'International Tables Vol C 4.2.6.8 and 6.1.1.4'
 Fe      0.3463   0.8444  11.7695   4.7611   7.3573   0.3072   3.5222  15.3535
   2.3045  76.8805   1.0369 'International Tables Vol C 4.2.6.8 and 6.1.1.4'
 B       0.0013   0.0007   2.0545  23.2185   1.3326   1.0210   1.0979  60.3498
   0.7068   0.1403  -0.1932 'International Tables Vol C 4.2.6.8 and 6.1.1.4'
 Si      0.0817   0.0704   6.2915   2.4386   3.0353  32.3337   1.9891   0.6785
   1.5410  81.6937   1.1407 'International Tables Vol C 4.2.6.8 and 6.1.1.4'
 F       0.0171   0.0103   3.5392  10.2825   2.6412   4.2944   1.5170   0.2615
   1.0243  26.1476   0.2776 'International Tables Vol C 4.2.6.8 and 6.1.1.4'
 K       0.2009   0.2494   8.2186  12.7949   7.4398   0.7748   1.0519 213.1870
   0.8659  41.6841   1.4228 'International Tables Vol C 4.2.6.8 and 6.1.1.4'
 
 
_cell_formula_units_Z                    4

# Given Formula = C30 H30 B1 F2 Fe1 K1 O7 Si1 
# Dc =      1.02 Fooo =   1768.00 Mu =      5.05 M =    674.40
# Found Formula = C42 H61 B1 F1 Fe1 K1 O7 Si1 
# Dc =      1.26 FOOO =   1768.00 Mu =      5.15 M =    830.78

_chemical_formula_sum             'C42 H61 B1 F1 Fe1 K1 O7 Si1'
_chemical_formula_moiety          'C42 H61 B1 F1 Fe1 K1 O7 Si1'
_chemical_compound_source                .
_chemical_formula_weight            830.78
 
 
_cell_measurement_reflns_used        10081
_cell_measurement_theta_min              5
_cell_measurement_theta_max             27
_cell_measurement_temperature          150
 
_exptl_crystal_description        '?' 
_exptl_crystal_colour             'orange' 
_exptl_crystal_size_min           0.140 
_exptl_crystal_size_mid           0.140 
_exptl_crystal_size_max           0.160 
 
_exptl_crystal_density_diffrn     1.256 
_exptl_crystal_density_meas       . 
_exptl_crystal_density_method     'not measured' 
# Non-dispersive F(000): 
_exptl_crystal_F_000              1768 
_exptl_absorpt_coefficient_mu     0.515 
 
# Sheldrick geometric approximatio 0.93 0.93 
_exptl_absorpt_correction_type    multi-scan 
_exptl_absorpt_process_details    'DENZO/SCALEPACK (Otwinowski & Minor, 1997)' 
_exptl_absorpt_correction_T_min   0.86 
_exptl_absorpt_correction_T_max   0.93 
# For a Kappa CCD, set Tmin to 1.0 and 
# Tmax to the ratio of max:min frame scales in scale_all.log 
_diffrn_measurement_device_type   'Nonius KappaCCD' 
_diffrn_measurement_device        'Area' 
_diffrn_radiation_monochromator   'graphite' 
_diffrn_radiation_type            'Mo K\a'
_diffrn_radiation_wavelength           0.71073
_diffrn_measurement_method        \w 
 
# If a reference occurs more than once, delete the author 
# and date from subsequent references. 
_computing_data_collection        'COLLECT (Nonius, 2001).' 
_computing_cell_refinement        'DENZO/SCALEPACK (Otwinowski & Minor, 1997)' 
_computing_data_reduction         'DENZO/SCALEPACK (Otwinowski & Minor, 1997)' 
_computing_structure_solution     'Superflip (Palatinus & Chapuis, 2007)' 
_computing_structure_refinement   'CRYSTALS (Betteridge et al., 2003)' 
_computing_publication_material   'CRYSTALS (Betteridge et al., 2003)' 
_computing_molecular_graphics     'CAMERON (Watkin et al., 1996)' 
 
_diffrn_standards_interval_time   . 
_diffrn_standards_interval_count  . 
_diffrn_standards_number          0 
_diffrn_standards_decay_%         . 
 
_diffrn_ambient_temperature        150
_diffrn_reflns_number             76059 
_reflns_number_total              9984 
_diffrn_reflns_av_R_equivalents   0.036 
# Number of reflections without Friedels Law is 17829 
# Number of reflections with Friedels Law is 9984 
# Theoretical number of reflections is about 10079 
 
 
_diffrn_reflns_theta_min          5.106 
_diffrn_reflns_theta_max          27.484 
_diffrn_measured_fraction_theta_max 0.992 
 
_diffrn_reflns_theta_full         26.934 
_diffrn_measured_fraction_theta_full 0.993 
 
 
_diffrn_reflns_limit_h_min        -16 
_diffrn_reflns_limit_h_max        16 
_diffrn_reflns_limit_k_min        -18 
_diffrn_reflns_limit_k_max        17 
_diffrn_reflns_limit_l_min        -31 
_diffrn_reflns_limit_l_max        31 
_reflns_limit_h_min               -16 
_reflns_limit_h_max               16 
_reflns_limit_k_min               0 
_reflns_limit_k_max               18 
_reflns_limit_l_min               0 
_reflns_limit_l_max               31 
 
_oxford_diffrn_Wilson_B_factor    2.85 
_oxford_diffrn_Wilson_scale       19.01 
 
_atom_sites_solution_primary      Other  #heavy,direct,difmap,geom
# _atom_sites_solution_secondary  difmap
_atom_sites_solution_hydrogens    difmap
 
_refine_diff_density_min          -0.66 
_refine_diff_density_max          0.66 
 
 
# The current dictionary definitions do not cover the 
# situation where the reflections used for refinement were 
# selected by a user-defined sigma threshold 
 
 
# The values actually used during refinement 
_oxford_reflns_threshold_expression_ref     I>-3.0\s(I)
_refine_ls_number_reflns          9984 
_refine_ls_number_restraints      0 
_refine_ls_number_parameters      487 
_oxford_refine_ls_R_factor_ref    0.0820 
_refine_ls_wR_factor_ref          0.1099 
_refine_ls_goodness_of_fit_ref    0.9461 
_refine_ls_shift/su_max           0.0010846 
_refine_ls_shift/su_mean          0.0000435 
 
 
# The values computed with all filters except I/sigma 
_oxford_reflns_number_all         9984 
_refine_ls_R_factor_all           0.0820 
_refine_ls_wR_factor_all          0.1099 
 
# The values computed with a 2 sigma cutoff - a la SHELX 
_reflns_threshold_expression      I>2.0\s(I)
_reflns_number_gt                 6965 
_refine_ls_R_factor_gt            0.0495 
_refine_ls_wR_factor_gt           0.0980 
 
# choose from: rm (reference molecule of known chirality), 
# ad (anomolous dispersion - Flack), rmad (rm and ad), 
# syn (from synthesis), unk (unknown) or . (not applicable). 
_chemical_absolute_configuration  '.' 
 
 
_refine_ls_structure_factor_coef  Fsqd 
_refine_ls_matrix_type            full
_refine_ls_hydrogen_treatment     constr         #undef, noref, refall,
                                                 # refxyz, refU, constr or mixed
_refine_ls_weighting_scheme       calc 
_refine_ls_weighting_details 
;
 Method= Modified Sheldrick 
 w=1/[\s^2^(F^2^) + ( 0.03P)^2^ + 4.01P] 
 ,where P=(max(Fo^2^,0) + 2Fc^2^)/3 
;
# Insert your own references if required - in alphabetical order 
_publ_section_references 
; 
Betteridge, P.W., Carruthers, J.R., Cooper, R.I., 
Prout, K. & Watkin, D.J. (2003). J. Appl. Cryst. 36, 1487. 
 
Nonius (2001). COLLECT. Nonius BV, Delft, The Netherlands. 
 
Otwinowski, Z. & Minor, W. (1997). Methods in Enzymology, Vol. 276, 
edited by C. W. Carter Jr & R. M. Sweet, pp. 307--326. 
New York: Academic Press. 
 
Palatinus, L. & Chapuis, G. (2007). J. Appl. Cryst. 40, 786-790. 
 
Watkin, D.J., Prout, C.K. & Pearce, L.J. (1996). CAMERON, Chemical 
Crystallography Laboratory, Oxford, UK. 
; 

# Uequiv = arithmetic mean of Ui i.e. Ueqiv = (U1+U2+U3)/3

# Replace last . with number of unfound hydrogen atoms attached to an atom.

# ..._refinement_flags_... 
# . no refinement constraints           S special position constraint on site
# G rigid group refinement of site      R riding atom
# D distance or angle restraint on site T thermal displacement constraints
# U Uiso or Uij restraint (rigid bond)  P partial occupancy constraint


loop_
_atom_site_label
_atom_site_type_symbol
_atom_site_fract_x
_atom_site_fract_y
_atom_site_fract_z
_atom_site_U_iso_or_equiv
_atom_site_occupancy
_atom_site_adp_type
_atom_site_refinement_flags_posn
_atom_site_refinement_flags_adp
_atom_site_refinement_flags_occupancy
_atom_site_disorder_assembly
_atom_site_disorder_group
_atom_site_attached_hydrogens
Fe1 Fe 0.70368(3) 0.61370(3) 0.529630(14) 0.0417 1.0000 Uani . . . . . . 
C2 C 0.79455(17) 0.63221(15) 0.60316(9) 0.0299 1.0000 Uani . . . . . . 
C3 C 0.68345(17) 0.60745(14) 0.61260(9) 0.0302 1.0000 Uani . . . . . . 
C4 C 0.66264(19) 0.51942(16) 0.58615(10) 0.0391 1.0000 Uani . . . . . . 
C5 C 0.7563(2) 0.48999(18) 0.56048(11) 0.0476 1.0000 Uani . . . . . . 
C6 C 0.83523(19) 0.55959(17) 0.57007(10) 0.0413 1.0000 Uani . . . . . . 
Si7 Si 0.57885(5) 0.66131(5) 0.65363(3) 0.0413 1.0000 Uani . . . . . . 
O8 O 0.60679(14) 0.76792(12) 0.67095(8) 0.0557 1.0000 Uani . . . . . . 
C9 C 0.5626(3) 0.5913(2) 0.71682(14) 0.0773 1.0000 Uani . . . . . . 
C10 C 0.4459(2) 0.6614(3) 0.61610(18) 0.0952 1.0000 Uani . . . . . . 
B11 B 0.86165(19) 0.72072(17) 0.62813(10) 0.0283 1.0000 Uani . . . . . . 
F12 F 0.78488(9) 0.79996(8) 0.62514(5) 0.0322 1.0000 Uani . . . . . . 
C13 C 0.89653(16) 0.71444(15) 0.69489(9) 0.0295 1.0000 Uani . . . . . . 
C14 C 0.89071(17) 0.63606(16) 0.72972(9) 0.0344 1.0000 Uani . . . . . . 
C15 C 0.8545(2) 0.54073(17) 0.71114(11) 0.0460 1.0000 Uani . . . . . . 
C16 C 0.92113(19) 0.64228(19) 0.78566(10) 0.0436 1.0000 Uani . . . . . . 
C17 C 0.9587(2) 0.7225(2) 0.80998(10) 0.0477 1.0000 Uani . . . . . . 
C18 C 0.9915(3) 0.7259(3) 0.87060(12) 0.0756 1.0000 Uani . . . . . . 
C19 C 0.96498(18) 0.79903(19) 0.77695(10) 0.0430 1.0000 Uani . . . . . . 
C20 C 0.93465(17) 0.79720(16) 0.72111(9) 0.0338 1.0000 Uani . . . . . . 
C21 C 0.94444(19) 0.88745(16) 0.69037(10) 0.0410 1.0000 Uani . . . . . . 
C22 C 0.96511(17) 0.74389(15) 0.58941(9) 0.0306 1.0000 Uani . . . . . . 
C23 C 1.05685(17) 0.68586(16) 0.59131(9) 0.0349 1.0000 Uani . . . . . . 
C24 C 1.07233(19) 0.60787(18) 0.63245(11) 0.0434 1.0000 Uani . . . . . . 
C25 C 1.14041(19) 0.69827(18) 0.55587(10) 0.0421 1.0000 Uani . . . . . . 
C26 C 1.1407(2) 0.7695(2) 0.51833(10) 0.0469 1.0000 Uani . . . . . . 
C27 C 1.2341(2) 0.7838(3) 0.48131(13) 0.0674 1.0000 Uani . . . . . . 
C28 C 1.0542(2) 0.82872(18) 0.51679(10) 0.0431 1.0000 Uani . . . . . . 
C29 C 0.96710(18) 0.81769(16) 0.55088(9) 0.0354 1.0000 Uani . . . . . . 
C30 C 0.8815(2) 0.89217(18) 0.54467(11) 0.0508 1.0000 Uani . . . . . . 
C31 C 0.7389(3) 0.7128(3) 0.47379(13) 0.0731 1.0000 Uani . . . . . . 
C32 C 0.6362(3) 0.7280(2) 0.49446(13) 0.0765 1.0000 Uani . . . . . . 
C33 C 0.5724(3) 0.6473(3) 0.48065(14) 0.0719 1.0000 Uani . . . . . . 
C34 C 0.6394(3) 0.5883(3) 0.45324(13) 0.0809 1.0000 Uani . . . . . . 
C35 C 0.7413(3) 0.6268(3) 0.44961(13) 0.0859 1.0000 Uani . . . . . . 
K36 K 0.49039(4) 0.90863(3) 0.70450(2) 0.0367 1.0000 Uani . . . . . . 
O37 O 0.58969(14) 0.87004(12) 0.80774(7) 0.0445 1.0000 Uani . . . . . . 
C38 C 0.5504(2) 0.78714(18) 0.83164(11) 0.0526 1.0000 Uani . . . . . . 
C39 C 0.4318(2) 0.79469(19) 0.83411(11) 0.0534 1.0000 Uani . . . . . . 
O40 O 0.38497(13) 0.79401(11) 0.77995(7) 0.0437 1.0000 Uani . . . . . . 
C41 C 0.2719(2) 0.80778(19) 0.77809(13) 0.0555 1.0000 Uani . . . . . . 
C42 C 0.2318(2) 0.8040(2) 0.72007(13) 0.0547 1.0000 Uani . . . . . . 
O43 O 0.27131(13) 0.88115(12) 0.69125(8) 0.0480 1.0000 Uani . . . . . . 
C44 C 0.2347(2) 0.8819(2) 0.63469(13) 0.0605 1.0000 Uani . . . . . . 
C45 C 0.2687(2) 0.9698(2) 0.60920(13) 0.0592 1.0000 Uani . . . . . . 
O46 O 0.38221(14) 0.97010(12) 0.60716(7) 0.0477 1.0000 Uani . . . . . . 
C47 C 0.4216(3) 1.0504(2) 0.58126(12) 0.0643 1.0000 Uani . . . . . . 
C48 C 0.5403(3) 1.0473(2) 0.58343(12) 0.0687 1.0000 Uani . . . . . . 
O49 O 0.57812(14) 1.05332(12) 0.63891(7) 0.0487 1.0000 Uani . . . . . . 
C50 C 0.6924(2) 1.0537(2) 0.64474(12) 0.0546 1.0000 Uani . . . . . . 
C51 C 0.7247(2) 1.05684(18) 0.70393(12) 0.0504 1.0000 Uani . . . . . . 
O52 O 0.69499(13) 0.97132(11) 0.72757(7) 0.0427 1.0000 Uani . . . . . . 
C53 C 0.7372(2) 0.9597(2) 0.78223(11) 0.0508 1.0000 Uani . . . . . . 
C54 C 0.7031(2) 0.8673(2) 0.80225(11) 0.0504 1.0000 Uani . . . . . . 
H41 H 0.5947 0.4870 0.5856 0.0483 1.0000 Uiso R . . . . . 
H51 H 0.7656 0.4325 0.5388 0.0569 1.0000 Uiso R . . . . . 
H61 H 0.9069 0.5576 0.5553 0.0497 1.0000 Uiso R . . . . . 
H91 H 0.5046 0.6160 0.7367 0.1168 1.0000 Uiso R . . . . . 
H93 H 0.6290 0.5942 0.7387 0.1165 1.0000 Uiso R . . . . . 
H92 H 0.5479 0.5282 0.7061 0.1170 1.0000 Uiso R . . . . . 
H101 H 0.3941 0.6883 0.6395 0.1441 1.0000 Uiso R . . . . . 
H102 H 0.4510 0.6971 0.5826 0.1443 1.0000 Uiso R . . . . . 
H103 H 0.4273 0.5978 0.6079 0.1440 1.0000 Uiso R . . . . . 
H152 H 0.8480 0.5027 0.7430 0.0682 1.0000 Uiso R . . . . . 
H151 H 0.9064 0.5134 0.6893 0.0685 1.0000 Uiso R . . . . . 
H153 H 0.7861 0.5419 0.6915 0.0687 1.0000 Uiso R . . . . . 
H161 H 0.9164 0.5879 0.8071 0.0521 1.0000 Uiso R . . . . . 
H181 H 1.0182 0.7858 0.8802 0.1131 1.0000 Uiso R . . . . . 
H182 H 1.0447 0.6812 0.8788 0.1135 1.0000 Uiso R . . . . . 
H183 H 0.9319 0.7133 0.8921 0.1132 1.0000 Uiso R . . . . . 
H191 H 0.9900 0.8543 0.7918 0.0507 1.0000 Uiso R . . . . . 
H212 H 0.9866 0.9315 0.7123 0.0631 1.0000 Uiso R . . . . . 
H211 H 0.9796 0.8804 0.6560 0.0625 1.0000 Uiso R . . . . . 
H213 H 0.8745 0.9142 0.6820 0.0627 1.0000 Uiso R . . . . . 
H242 H 1.1344 0.5725 0.6243 0.0662 1.0000 Uiso R . . . . . 
H241 H 1.0815 0.6333 0.6686 0.0664 1.0000 Uiso R . . . . . 
H243 H 1.0116 0.5683 0.6316 0.0660 1.0000 Uiso R . . . . . 
H251 H 1.1976 0.6581 0.5576 0.0510 1.0000 Uiso R . . . . . 
H272 H 1.2407 0.8480 0.4752 0.1022 1.0000 Uiso R . . . . . 
H271 H 1.2985 0.7613 0.4989 0.1023 1.0000 Uiso R . . . . . 
H273 H 1.2207 0.7515 0.4476 0.1021 1.0000 Uiso R . . . . . 
H281 H 1.0536 0.8777 0.4926 0.0519 1.0000 Uiso R . . . . . 
H301 H 0.8902 0.9249 0.5112 0.0756 1.0000 Uiso R . . . . . 
H302 H 0.8887 0.9359 0.5743 0.0760 1.0000 Uiso R . . . . . 
H303 H 0.8109 0.8658 0.5441 0.0757 1.0000 Uiso R . . . . . 
H311 H 0.7995 0.7553 0.4782 0.0886 1.0000 Uiso R . . . . . 
H321 H 0.6124 0.7803 0.5144 0.0919 1.0000 Uiso R . . . . . 
H331 H 0.4969 0.6384 0.4890 0.0871 1.0000 Uiso R . . . . . 
H341 H 0.6192 0.5267 0.4397 0.0973 1.0000 Uiso R . . . . . 
H351 H 0.8050 0.5966 0.4349 0.1050 1.0000 Uiso R . . . . . 
H381 H 0.5823 0.7786 0.8679 0.0642 1.0000 Uiso R . . . . . 
H382 H 0.5685 0.7339 0.8088 0.0639 1.0000 Uiso R . . . . . 
H392 H 0.4138 0.8525 0.8524 0.0638 1.0000 Uiso R . . . . . 
H391 H 0.4041 0.7419 0.8549 0.0639 1.0000 Uiso R . . . . . 
H411 H 0.2573 0.8675 0.7944 0.0655 1.0000 Uiso R . . . . . 
H412 H 0.2388 0.7589 0.7985 0.0660 1.0000 Uiso R . . . . . 
H422 H 0.1540 0.8044 0.7182 0.0662 1.0000 Uiso R . . . . . 
H421 H 0.2569 0.7465 0.7036 0.0653 1.0000 Uiso R . . . . . 
H441 H 0.1578 0.8771 0.6325 0.0721 1.0000 Uiso R . . . . . 
H442 H 0.2658 0.8284 0.6161 0.0717 1.0000 Uiso R . . . . . 
H452 H 0.2450 1.0225 0.6309 0.0711 1.0000 Uiso R . . . . . 
H451 H 0.2377 0.9746 0.5722 0.0711 1.0000 Uiso R . . . . . 
H471 H 0.3958 1.1059 0.6006 0.0780 1.0000 Uiso R . . . . . 
H472 H 0.3935 1.0518 0.5432 0.0781 1.0000 Uiso R . . . . . 
H482 H 0.5674 1.0993 0.5635 0.0819 1.0000 Uiso R . . . . . 
H481 H 0.5655 0.9899 0.5669 0.0818 1.0000 Uiso R . . . . . 
H501 H 0.7189 1.1087 0.6262 0.0654 1.0000 Uiso R . . . . . 
H502 H 0.7216 0.9996 0.6271 0.0657 1.0000 Uiso R . . . . . 
H512 H 0.6876 1.1085 0.7218 0.0608 1.0000 Uiso R . . . . . 
H511 H 0.8017 1.0655 0.7081 0.0614 1.0000 Uiso R . . . . . 
H532 H 0.7107 1.0084 0.8058 0.0611 1.0000 Uiso R . . . . . 
H531 H 0.8158 0.9618 0.7823 0.0611 1.0000 Uiso R . . . . . 
H541 H 0.7391 0.8547 0.8375 0.0603 1.0000 Uiso R . . . . . 
H542 H 0.7227 0.8195 0.7761 0.0594 1.0000 Uiso R . . . . . 
H81 H 0.6638 0.7871 0.6580 0.0839 1.0000 Uiso R . . . . . 
loop_
_atom_site_aniso_label
_atom_site_aniso_U_11
_atom_site_aniso_U_22
_atom_site_aniso_U_33
_atom_site_aniso_U_23
_atom_site_aniso_U_13
_atom_site_aniso_U_12
Fe1 0.0509(2) 0.0464(2) 0.02717(18) 0.00028(15) -0.00607(15) -0.01293(17) 
C2 0.0322(11) 0.0311(11) 0.0260(11) 0.0035(9) -0.0013(9) 0.0000(9) 
C3 0.0355(11) 0.0280(11) 0.0268(11) 0.0012(9) -0.0022(9) -0.0044(9) 
C4 0.0439(13) 0.0353(12) 0.0376(13) -0.0014(10) -0.0028(11) -0.0101(10) 
C5 0.0617(17) 0.0354(13) 0.0457(15) -0.0123(11) 0.0023(13) -0.0029(12) 
C6 0.0399(13) 0.0413(13) 0.0431(14) -0.0082(11) 0.0062(11) -0.0003(11) 
Si7 0.0359(3) 0.0367(4) 0.0520(4) -0.0055(3) 0.0104(3) -0.0059(3) 
O8 0.0465(10) 0.0367(10) 0.0860(15) -0.0118(9) 0.0282(10) -0.0060(8) 
C9 0.116(3) 0.0535(18) 0.067(2) 0.0004(16) 0.054(2) -0.0003(18) 
C10 0.0379(17) 0.126(3) 0.122(3) -0.041(3) 0.0008(18) 0.0030(19) 
B11 0.0289(12) 0.0274(12) 0.0287(13) 0.0019(10) 0.0005(10) 0.0009(10) 
F12 0.0319(6) 0.0269(6) 0.0377(7) 0.0032(5) -0.0007(5) 0.0004(5) 
C13 0.0234(10) 0.0360(12) 0.0290(11) 0.0001(9) 0.0003(8) -0.0006(9) 
C14 0.0307(11) 0.0434(13) 0.0292(12) 0.0059(10) 0.0003(9) 0.0022(10) 
C15 0.0546(15) 0.0389(14) 0.0437(15) 0.0146(11) -0.0066(12) -0.0033(12) 
C16 0.0400(13) 0.0583(16) 0.0326(13) 0.0118(12) 0.0024(10) 0.0053(12) 
C17 0.0402(14) 0.0710(19) 0.0316(13) 0.0001(13) -0.0007(11) 0.0059(13) 
C18 0.076(2) 0.117(3) 0.0327(16) -0.0073(17) -0.0099(15) 0.007(2) 
C19 0.0336(12) 0.0568(16) 0.0382(14) -0.0148(12) -0.0016(10) -0.0019(11) 
C20 0.0260(11) 0.0417(13) 0.0338(12) -0.0046(10) 0.0020(9) -0.0017(9) 
C21 0.0406(13) 0.0366(13) 0.0455(14) -0.0072(11) -0.0005(11) -0.0079(11) 
C22 0.0318(11) 0.0341(12) 0.0258(11) -0.0003(9) -0.0018(9) -0.0043(9) 
C23 0.0310(11) 0.0420(13) 0.0317(12) 0.0003(10) 0.0005(9) -0.0021(10) 
C24 0.0360(13) 0.0479(15) 0.0463(14) 0.0064(12) 0.0035(11) 0.0097(11) 
C25 0.0324(12) 0.0560(16) 0.0379(14) -0.0042(12) 0.0018(10) 0.0006(11) 
C26 0.0401(14) 0.0666(18) 0.0344(14) -0.0025(12) 0.0061(11) -0.0133(13) 
C27 0.0556(18) 0.094(2) 0.0541(18) 0.0045(17) 0.0233(14) -0.0150(17) 
C28 0.0514(15) 0.0482(15) 0.0296(12) 0.0071(11) 0.0004(11) -0.0147(12) 
C29 0.0390(12) 0.0387(13) 0.0282(12) 0.0035(10) -0.0027(9) -0.0069(10) 
C30 0.0606(17) 0.0438(15) 0.0480(16) 0.0198(12) 0.0011(13) 0.0007(13) 
C31 0.087(3) 0.090(3) 0.0407(17) 0.0268(18) -0.0143(17) -0.029(2) 
C32 0.120(3) 0.066(2) 0.0409(17) 0.0148(15) -0.0261(19) 0.016(2) 
C33 0.067(2) 0.098(3) 0.0487(19) 0.0201(18) -0.0240(16) -0.0142(19) 
C34 0.108(3) 0.091(3) 0.0416(18) -0.0009(18) -0.0268(19) -0.028(2) 
C35 0.098(3) 0.128(4) 0.0310(16) 0.003(2) 0.0001(17) -0.005(3) 
K36 0.0377(3) 0.0363(3) 0.0363(3) -0.0009(2) 0.0030(2) 0.0007(2) 
O37 0.0520(10) 0.0442(10) 0.0374(9) 0.0001(8) 0.0015(8) 0.0017(8) 
C38 0.079(2) 0.0426(15) 0.0356(14) 0.0023(12) -0.0090(13) -0.0024(14) 
C39 0.081(2) 0.0383(14) 0.0421(16) 0.0004(12) 0.0153(14) -0.0099(14) 
O40 0.0472(10) 0.0411(9) 0.0435(10) -0.0019(8) 0.0103(8) 0.0031(8) 
C41 0.0527(16) 0.0398(15) 0.076(2) 0.0087(14) 0.0293(15) 0.0124(12) 
C42 0.0316(13) 0.0491(16) 0.084(2) 0.0063(15) 0.0093(13) 0.0012(12) 
O43 0.0408(9) 0.0463(10) 0.0571(12) 0.0009(9) 0.0042(8) -0.0003(8) 
C44 0.0380(14) 0.079(2) 0.0639(19) -0.0025(16) -0.0089(13) -0.0045(14) 
C45 0.0526(17) 0.073(2) 0.0509(17) 0.0053(15) -0.0097(13) 0.0085(15) 
O46 0.0503(10) 0.0486(10) 0.0438(10) 0.0018(8) -0.0019(8) 0.0031(8) 
C47 0.084(2) 0.0624(19) 0.0458(17) 0.0152(14) -0.0095(15) -0.0094(17) 
C48 0.084(2) 0.075(2) 0.0475(18) 0.0127(16) 0.0117(16) -0.0198(18) 
O49 0.0529(11) 0.0478(10) 0.0458(11) 0.0067(8) 0.0076(8) -0.0036(8) 
C50 0.0556(17) 0.0432(15) 0.0665(19) 0.0073(14) 0.0200(14) -0.0015(13) 
C51 0.0427(14) 0.0376(14) 0.072(2) -0.0040(13) 0.0110(13) -0.0045(11) 
O52 0.0442(9) 0.0384(9) 0.0453(10) -0.0040(8) -0.0005(8) -0.0065(7) 
C53 0.0437(14) 0.0613(18) 0.0470(16) -0.0191(13) -0.0023(12) -0.0014(13) 
C54 0.0510(15) 0.0667(18) 0.0327(14) -0.0049(12) -0.0082(11) 0.0081(13) 

_refine_ls_extinction_method 
    'None'
_oxford_refine_ls_scale 0.23541(12) 
loop_
 _geom_bond_atom_site_label_1
 _geom_bond_site_symmetry_1
 _geom_bond_atom_site_label_2
 _geom_bond_site_symmetry_2
 _geom_bond_distance
 _geom_bond_publ_flag
Fe1 . C2 . 2.100(2)    yes
Fe1 . C3 . 2.054(2)    yes
Fe1 . C4 . 2.020(2)    yes
Fe1 . C5 . 2.036(3)    yes
Fe1 . C6 . 2.036(3)    yes
Fe1 . C31 . 2.037(3)    yes
Fe1 . C32 . 2.027(3)    yes
Fe1 . C33 . 2.046(3)    yes
Fe1 . C34 . 2.033(3)    yes
Fe1 . C35 . 2.037(3)    yes
C2 . C3 . 1.459(3)    yes
C2 . C6 . 1.430(3)    yes
C2 . B11 . 1.632(3)    yes
C3 . C4 . 1.444(3)    yes
C3 . Si7 . 1.850(2)    yes
C4 . C5 . 1.414(4)    yes
C4 . H41 . 0.968    no
C5 . C6 . 1.419(3)    yes
C5 . H51 . 0.994    no
C6 . H61 . 0.979    no
Si7 . O8 . 1.6298(18)    yes
Si7 . C9 . 1.863(3)    yes
Si7 . C10 . 1.862(3)    yes
O8 . K36 . 2.6466(17)    yes
O8 . H81 . 0.837    no
C9 . H91 . 0.958    no
C9 . H93 . 0.968    no
C9 . H92 . 0.963    no
C10 . H101 . 0.962    no
C10 . H102 . 0.971    no
C10 . H103 . 0.966    no
B11 . F12 . 1.492(3)    yes
B11 . C13 . 1.672(3)    yes
B11 . C22 . 1.665(3)    yes
C13 . C14 . 1.419(3)    yes
C13 . C20 . 1.427(3)    yes
C14 . C15 . 1.512(3)    yes
C14 . C16 . 1.405(3)    yes
C15 . H152 . 0.958    no
C15 . H151 . 0.943    no
C15 . H153 . 0.962    no
C16 . C17 . 1.375(4)    yes
C16 . H161 . 0.946    no
C17 . C18 . 1.520(4)    yes
C17 . C19 . 1.372(4)    yes
C18 . H181 . 0.952    no
C18 . H182 . 0.942    no
C18 . H183 . 0.944    no
C19 . C20 . 1.400(3)    yes
C19 . H191 . 0.925    no
C20 . C21 . 1.511(3)    yes
C21 . H212 . 0.971    no
C21 . H211 . 0.968    no
C21 . H213 . 0.968    no
C22 . C23 . 1.418(3)    yes
C22 . C29 . 1.422(3)    yes
C23 . C24 . 1.516(3)    yes
C23 . C25 . 1.394(3)    yes
C24 . H242 . 0.955    no
C24 . H241 . 0.957    no
C24 . H243 . 0.949    no
C25 . C26 . 1.378(4)    yes
C25 . H251 . 0.919    no
C26 . C27 . 1.518(3)    yes
C26 . C28 . 1.376(4)    yes
C27 . H272 . 0.943    no
C27 . H271 . 0.952    no
C27 . H273 . 0.955    no
C28 . C29 . 1.405(3)    yes
C28 . H281 . 0.921    no
C29 . C30 . 1.518(3)    yes
C30 . H301 . 0.954    no
C30 . H302 . 0.961    no
C30 . H303 . 0.960    no
C31 . C32 . 1.413(5)    yes
C31 . C35 . 1.376(5)    yes
C31 . H311 . 0.976    no
C32 . C33 . 1.444(5)    yes
C32 . H321 . 0.952    no
C33 . C34 . 1.385(5)    yes
C33 . H331 . 0.980    no
C34 . C35 . 1.393(5)    yes
C34 . H341 . 0.978    no
C35 . H351 . 0.987    no
O37 . C38 . 1.427(3)    yes
O37 . C54 . 1.427(3)    yes
C38 . C39 . 1.487(4)    yes
C38 . H381 . 0.964    no
C38 . H382 . 0.981    no
C39 . O40 . 1.424(3)    yes
C39 . H392 . 0.976    no
C39 . H391 . 0.985    no
O40 . C41 . 1.424(3)    yes
C41 . C42 . 1.484(4)    yes
C41 . H411 . 0.969    no
C41 . H412 . 0.966    no
C42 . O43 . 1.417(3)    yes
C42 . H422 . 0.970    no
C42 . H421 . 0.979    no
O43 . C44 . 1.437(3)    yes
C44 . C45 . 1.483(4)    yes
C44 . H441 . 0.961    no
C44 . H442 . 0.984    no
C45 . O46 . 1.419(3)    yes
C45 . H452 . 0.980    no
C45 . H451 . 0.971    no
O46 . C47 . 1.418(3)    yes
C47 . C48 . 1.481(4)    yes
C47 . H471 . 0.991    no
C47 . H472 . 0.980    no
C48 . O49 . 1.419(3)    yes
C48 . H482 . 0.963    no
C48 . H481 . 0.980    no
O49 . C50 . 1.427(3)    yes
C50 . C51 . 1.485(4)    yes
C50 . H501 . 0.979    no
C50 . H502 . 0.970    no
C51 . O52 . 1.419(3)    yes
C51 . H512 . 0.989    no
C51 . H511 . 0.970    no
O52 . C53 . 1.424(3)    yes
C53 . C54 . 1.488(4)    yes
C53 . H532 . 0.974    no
C53 . H531 . 0.982    no
C54 . H541 . 0.971    no
C54 . H542 . 0.978    no
loop_
 _geom_angle_atom_site_label_1
 _geom_angle_site_symmetry_1
 _geom_angle_atom_site_label_2
 _geom_angle_site_symmetry_2
 _geom_angle_atom_site_label_3
 _geom_angle_site_symmetry_3
 _geom_angle
 _geom_angle_publ_flag
C2 . Fe1 . C3 . 41.10(8)    yes
C2 . Fe1 . C4 . 69.18(9)    yes
C3 . Fe1 . C4 . 41.51(9)    yes
C2 . Fe1 . C5 . 68.96(9)    yes
C3 . Fe1 . C5 . 69.36(9)    yes
C4 . Fe1 . C5 . 40.81(10)    yes
C2 . Fe1 . C6 . 40.40(9)    yes
C3 . Fe1 . C6 . 68.55(9)    yes
C4 . Fe1 . C6 . 68.41(10)    yes
C5 . Fe1 . C6 . 40.80(10)    yes
C2 . Fe1 . C31 . 111.06(11)    yes
C3 . Fe1 . C31 . 136.88(13)    yes
C4 . Fe1 . C31 . 177.13(14)    yes
C5 . Fe1 . C31 . 142.05(15)    yes
C6 . Fe1 . C31 . 113.73(13)    yes
C2 . Fe1 . C32 . 117.29(12)    yes
C3 . Fe1 . C32 . 112.82(12)    yes
C4 . Fe1 . C32 . 136.52(14)    yes
C5 . Fe1 . C32 . 172.98(13)    yes
C6 . Fe1 . C32 . 146.10(14)    yes
C2 . Fe1 . C33 . 149.34(13)    yes
C3 . Fe1 . C33 . 117.30(13)    yes
C4 . Fe1 . C33 . 109.84(12)    yes
C5 . Fe1 . C33 . 131.45(13)    yes
C6 . Fe1 . C33 . 169.81(14)    yes
C2 . Fe1 . C34 . 170.30(15)    yes
C3 . Fe1 . C34 . 146.85(13)    yes
C4 . Fe1 . C34 . 113.84(13)    yes
C5 . Fe1 . C34 . 106.88(14)    yes
C6 . Fe1 . C34 . 130.94(15)    yes
C2 . Fe1 . C35 . 132.12(13)    yes
C3 . Fe1 . C35 . 173.13(13)    yes
C4 . Fe1 . C35 . 142.47(15)    yes
C5 . Fe1 . C35 . 110.65(15)    yes
C6 . Fe1 . C35 . 106.73(14)    yes
C31 . Fe1 . C32 . 40.69(15)    yes
C31 . Fe1 . C33 . 68.40(14)    yes
C32 . Fe1 . C33 . 41.53(14)    yes
C31 . Fe1 . C34 . 66.42(14)    yes
C32 . Fe1 . C34 . 67.48(15)    yes
C33 . Fe1 . C34 . 39.70(15)    yes
C31 . Fe1 . C35 . 39.48(15)    yes
C32 . Fe1 . C35 . 68.05(17)    yes
C33 . Fe1 . C35 . 68.16(16)    yes
C34 . Fe1 . C35 . 40.02(15)    yes
Fe1 . C2 . C3 . 67.75(12)    yes
Fe1 . C2 . C6 . 67.37(13)    yes
C3 . C2 . C6 . 105.76(19)    yes
Fe1 . C2 . B11 . 132.02(14)    yes
C3 . C2 . B11 . 127.51(18)    yes
C6 . C2 . B11 . 126.63(19)    yes
C2 . C3 . Fe1 . 71.15(12)    yes
C2 . C3 . C4 . 107.41(19)    yes
Fe1 . C3 . C4 . 67.96(13)    yes
C2 . C3 . Si7 . 132.77(16)    yes
Fe1 . C3 . Si7 . 129.37(12)    yes
C4 . C3 . Si7 . 119.63(16)    yes
C3 . C4 . Fe1 . 70.53(12)    yes
C3 . C4 . C5 . 109.0(2)    yes
Fe1 . C4 . C5 . 70.23(15)    yes
C3 . C4 . H41 . 124.9    no
Fe1 . C4 . H41 . 124.2    no
C5 . C4 . H41 . 126.0    no
C4 . C5 . Fe1 . 68.96(14)    yes
C4 . C5 . C6 . 107.1(2)    yes
Fe1 . C5 . C6 . 69.58(15)    yes
C4 . C5 . H51 . 127.1    no
Fe1 . C5 . H51 . 125.3    no
C6 . C5 . H51 . 125.7    no
C2 . C6 . C5 . 110.6(2)    yes
C2 . C6 . Fe1 . 72.23(13)    yes
C5 . C6 . Fe1 . 69.62(15)    yes
C2 . C6 . H61 . 125.5    no
C5 . C6 . H61 . 123.9    no
Fe1 . C6 . H61 . 124.3    no
C3 . Si7 . O8 . 112.92(9)    yes
C3 . Si7 . C9 . 108.91(12)    yes
O8 . Si7 . C9 . 109.08(13)    yes
C3 . Si7 . C10 . 111.60(14)    yes
O8 . Si7 . C10 . 107.66(16)    yes
C9 . Si7 . C10 . 106.4(2)    yes
Si7 . O8 . K36 . 133.69(9)    yes
Si7 . O8 . H81 . 113.0    no
K36 . O8 . H81 . 110.4    no
Si7 . C9 . H91 . 109.2    no
Si7 . C9 . H93 . 108.4    no
H91 . C9 . H93 . 110.5    no
Si7 . C9 . H92 . 108.3    no
H91 . C9 . H92 . 110.5    no
H93 . C9 . H92 . 109.9    no
Si7 . C10 . H101 . 108.3    no
Si7 . C10 . H102 . 109.1    no
H101 . C10 . H102 . 110.9    no
Si7 . C10 . H103 . 107.6    no
H101 . C10 . H103 . 110.2    no
H102 . C10 . H103 . 110.7    no
C2 . B11 . F12 . 105.28(16)    yes
C2 . B11 . C13 . 115.50(17)    yes
F12 . B11 . C13 . 103.28(16)    yes
C2 . B11 . C22 . 110.05(17)    yes
F12 . B11 . C22 . 109.24(17)    yes
C13 . B11 . C22 . 112.83(17)    yes
B11 . C13 . C14 . 127.58(19)    yes
B11 . C13 . C20 . 117.40(18)    yes
C14 . C13 . C20 . 115.00(19)    yes
C13 . C14 . C15 . 124.6(2)    yes
C13 . C14 . C16 . 120.9(2)    yes
C15 . C14 . C16 . 114.5(2)    yes
C14 . C15 . H152 . 108.2    no
C14 . C15 . H151 . 110.3    no
H152 . C15 . H151 . 107.7    no
C14 . C15 . H153 . 112.4    no
H152 . C15 . H153 . 108.2    no
H151 . C15 . H153 . 109.9    no
C14 . C16 . C17 . 123.2(2)    yes
C14 . C16 . H161 . 117.6    no
C17 . C16 . H161 . 119.2    no
C16 . C17 . C18 . 121.4(3)    yes
C16 . C17 . C19 . 116.8(2)    yes
C18 . C17 . C19 . 121.8(3)    yes
C17 . C18 . H181 . 110.3    no
C17 . C18 . H182 . 110.2    no
H181 . C18 . H182 . 109.5    no
C17 . C18 . H183 . 110.4    no
H181 . C18 . H183 . 108.3    no
H182 . C18 . H183 . 108.2    no
C17 . C19 . C20 . 122.5(2)    yes
C17 . C19 . H191 . 119.4    no
C20 . C19 . H191 . 118.1    no
C13 . C20 . C19 . 121.6(2)    yes
C13 . C20 . C21 . 122.1(2)    yes
C19 . C20 . C21 . 116.3(2)    yes
C20 . C21 . H212 . 110.1    no
C20 . C21 . H211 . 112.8    no
H212 . C21 . H211 . 106.9    no
C20 . C21 . H213 . 111.0    no
H212 . C21 . H213 . 108.5    no
H211 . C21 . H213 . 107.3    no
B11 . C22 . C23 . 120.44(19)    yes
B11 . C22 . C29 . 124.15(19)    yes
C23 . C22 . C29 . 115.34(19)    yes
C22 . C23 . C24 . 122.7(2)    yes
C22 . C23 . C25 . 121.8(2)    yes
C24 . C23 . C25 . 115.4(2)    yes
C23 . C24 . H242 . 110.0    no
C23 . C24 . H241 . 109.4    no
H242 . C24 . H241 . 109.3    no
C23 . C24 . H243 . 110.7    no
H242 . C24 . H243 . 109.1    no
H241 . C24 . H243 . 108.3    no
C23 . C25 . C26 . 122.1(2)    yes
C23 . C25 . H251 . 119.3    no
C26 . C25 . H251 . 118.6    no
C25 . C26 . C27 . 121.4(3)    yes
C25 . C26 . C28 . 117.3(2)    yes
C27 . C26 . C28 . 121.3(3)    yes
C26 . C27 . H272 . 107.6    no
C26 . C27 . H271 . 109.9    no
H272 . C27 . H271 . 109.1    no
C26 . C27 . H273 . 109.7    no
H272 . C27 . H273 . 110.9    no
H271 . C27 . H273 . 109.7    no
C26 . C28 . C29 . 122.6(2)    yes
C26 . C28 . H281 . 118.7    no
C29 . C28 . H281 . 118.7    no
C22 . C29 . C28 . 120.8(2)    yes
C22 . C29 . C30 . 124.4(2)    yes
C28 . C29 . C30 . 114.7(2)    yes
C29 . C30 . H301 . 109.4    no
C29 . C30 . H302 . 110.3    no
H301 . C30 . H302 . 108.1    no
C29 . C30 . H303 . 111.2    no
H301 . C30 . H303 . 108.7    no
H302 . C30 . H303 . 109.2    no
Fe1 . C31 . C32 . 69.29(18)    yes
Fe1 . C31 . C35 . 70.3(2)    yes
C32 . C31 . C35 . 109.3(3)    yes
Fe1 . C31 . H311 . 123.6    no
C32 . C31 . H311 . 124.9    no
C35 . C31 . H311 . 125.7    no
C31 . C32 . Fe1 . 70.02(19)    yes
C31 . C32 . C33 . 106.9(3)    yes
Fe1 . C32 . C33 . 69.94(18)    yes
C31 . C32 . H321 . 127.8    no
Fe1 . C32 . H321 . 124.1    no
C33 . C32 . H321 . 125.3    no
C32 . C33 . Fe1 . 68.54(17)    yes
C32 . C33 . C34 . 105.7(3)    yes
Fe1 . C33 . C34 . 69.63(19)    yes
C32 . C33 . H331 . 125.6    no
Fe1 . C33 . H331 . 126.8    no
C34 . C33 . H331 . 128.7    no
C33 . C34 . Fe1 . 70.67(18)    yes
C33 . C34 . C35 . 110.9(3)    yes
Fe1 . C34 . C35 . 70.15(18)    yes
C33 . C34 . H341 . 124.7    no
Fe1 . C34 . H341 . 124.1    no
C35 . C34 . H341 . 124.3    no
C34 . C35 . Fe1 . 69.82(19)    yes
C34 . C35 . C31 . 107.2(4)    yes
Fe1 . C35 . C31 . 70.25(19)    yes
C34 . C35 . H351 . 126.8    no
Fe1 . C35 . H351 . 121.9    no
C31 . C35 . H351 . 125.9    no
C38 . O37 . C54 . 112.0(2)    yes
O37 . C38 . C39 . 108.3(2)    yes
O37 . C38 . H381 . 110.4    no
C39 . C38 . H381 . 110.2    no
O37 . C38 . H382 . 109.4    no
C39 . C38 . H382 . 109.5    no
H381 . C38 . H382 . 109.0    no
C38 . C39 . O40 . 109.4(2)    yes
C38 . C39 . H392 . 109.2    no
O40 . C39 . H392 . 109.7    no
C38 . C39 . H391 . 109.6    no
O40 . C39 . H391 . 109.5    no
H392 . C39 . H391 . 109.5    no
C39 . O40 . C41 . 113.4(2)    yes
O40 . C41 . C42 . 108.6(2)    yes
O40 . C41 . H411 . 108.3    no
C42 . C41 . H411 . 111.3    no
O40 . C41 . H412 . 108.9    no
C42 . C41 . H412 . 109.4    no
H411 . C41 . H412 . 110.3    no
C41 . C42 . O43 . 109.6(2)    yes
C41 . C42 . H422 . 109.9    no
O43 . C42 . H422 . 110.0    no
C41 . C42 . H421 . 108.8    no
O43 . C42 . H421 . 109.8    no
H422 . C42 . H421 . 108.7    no
C42 . O43 . C44 . 112.3(2)    yes
O43 . C44 . C45 . 108.9(2)    yes
O43 . C44 . H441 . 109.3    no
C45 . C44 . H441 . 109.9    no
O43 . C44 . H442 . 108.8    no
C45 . C44 . H442 . 110.6    no
H441 . C44 . H442 . 109.3    no
C44 . C45 . O46 . 108.7(2)    yes
C44 . C45 . H452 . 109.8    no
O46 . C45 . H452 . 109.9    no
C44 . C45 . H451 . 110.0    no
O46 . C45 . H451 . 109.1    no
H452 . C45 . H451 . 109.2    no
C45 . O46 . C47 . 112.5(2)    yes
O46 . C47 . C48 . 108.9(3)    yes
O46 . C47 . H471 . 108.8    no
C48 . C47 . H471 . 110.6    no
O46 . C47 . H472 . 108.8    no
C48 . C47 . H472 . 110.6    no
H471 . C47 . H472 . 109.0    no
C47 . C48 . O49 . 108.9(2)    yes
C47 . C48 . H482 . 109.2    no
O49 . C48 . H482 . 109.0    no
C47 . C48 . H481 . 110.4    no
O49 . C48 . H481 . 110.3    no
H482 . C48 . H481 . 109.0    no
C48 . O49 . C50 . 112.7(2)    yes
O49 . C50 . C51 . 109.1(2)    yes
O49 . C50 . H501 . 108.2    no
C51 . C50 . H501 . 110.0    no
O49 . C50 . H502 . 110.2    no
C51 . C50 . H502 . 111.4    no
H501 . C50 . H502 . 108.0    no
C50 . C51 . O52 . 107.7(2)    yes
C50 . C51 . H512 . 109.8    no
O52 . C51 . H512 . 110.0    no
C50 . C51 . H511 . 109.5    no
O52 . C51 . H511 . 110.1    no
H512 . C51 . H511 . 109.7    no
C51 . O52 . C53 . 113.0(2)    yes
O52 . C53 . C54 . 108.3(2)    yes
O52 . C53 . H532 . 110.3    no
C54 . C53 . H532 . 110.1    no
O52 . C53 . H531 . 109.1    no
C54 . C53 . H531 . 109.1    no
H532 . C53 . H531 . 109.9    no
C53 . C54 . O37 . 107.7(2)    yes
C53 . C54 . H541 . 109.4    no
O37 . C54 . H541 . 110.2    no
C53 . C54 . H542 . 109.6    no
O37 . C54 . H542 . 110.9    no
H541 . C54 . H542 . 109.1    no
loop_
 _geom_hbond_atom_site_label_D
 _geom_hbond_site_symmetry_D
 _geom_hbond_atom_site_label_H
 _geom_hbond_site_symmetry_H
 _geom_hbond_atom_site_label_A
 _geom_hbond_site_symmetry_A
 _geom_hbond_angle_DHA
 _geom_hbond_distance_DH
 _geom_hbond_distance_HA
 _geom_hbond_distance_DA
 _geom_hbond_publ_flag
C15 . H153 . C3 . 145.18 0.962 2.457 3.293(4)    yes
C21 . H211 . C22 . 127.59 0.968 2.557 3.239(4)    yes


_iucr_refine_instructions_details_constraints
;
#
# Punched on 05/10/12 at 08:29:21
#
#LIST     12                                                                    
BLOCK SCALE X'S, U'S 
RIDE C   (   4,X'S) H   (  41,X'S) 
RIDE C   (   5,X'S) H   (  51,X'S) 
RIDE C   (   6,X'S) H   (  61,X'S) 
RIDE O   (   8,X'S) H   (  81,X'S) 
RIDE C   (   9,X'S) H   (  91,X'S) H   (  93,X'S) H   (  92,X'S) 
RIDE C   (  10,X'S) H   ( 101,X'S) H   ( 102,X'S) H   ( 103,X'S) 
RIDE C   (  15,X'S) H   ( 152,X'S) H   ( 151,X'S) H   ( 153,X'S) 
RIDE C   (  16,X'S) H   ( 161,X'S) 
RIDE C   (  18,X'S) H   ( 181,X'S) H   ( 182,X'S) H   ( 183,X'S) 
RIDE C   (  19,X'S) H   ( 191,X'S) 
RIDE C   (  21,X'S) H   ( 212,X'S) H   ( 211,X'S) H   ( 213,X'S) 
RIDE C   (  24,X'S) H   ( 242,X'S) H   ( 241,X'S) H   ( 243,X'S) 
RIDE C   (  25,X'S) H   ( 251,X'S) 
RIDE C   (  27,X'S) H   ( 272,X'S) H   ( 271,X'S) H   ( 273,X'S) 
RIDE C   (  28,X'S) H   ( 281,X'S) 
RIDE C   (  30,X'S) H   ( 301,X'S) H   ( 302,X'S) H   ( 303,X'S) 
RIDE C   (  31,X'S) H   ( 311,X'S) 
RIDE C   (  32,X'S) H   ( 321,X'S) 
RIDE C   (  33,X'S) H   ( 331,X'S) 
RIDE C   (  34,X'S) H   ( 341,X'S) 
RIDE C   (  35,X'S) H   ( 351,X'S) 
RIDE C   (  38,X'S) H   ( 381,X'S) H   ( 382,X'S) 
RIDE C   (  39,X'S) H   ( 392,X'S) H   ( 391,X'S) 
RIDE C   (  41,X'S) H   ( 411,X'S) H   ( 412,X'S) 
RIDE C   (  42,X'S) H   ( 422,X'S) H   ( 421,X'S) 
RIDE C   (  44,X'S) H   ( 441,X'S) H   ( 442,X'S) 
RIDE C   (  45,X'S) H   ( 452,X'S) H   ( 451,X'S) 
RIDE C   (  47,X'S) H   ( 471,X'S) H   ( 472,X'S) 
RIDE C   (  48,X'S) H   ( 482,X'S) H   ( 481,X'S) 
RIDE C   (  50,X'S) H   ( 501,X'S) H   ( 502,X'S) 
RIDE C   (  51,X'S) H   ( 512,X'S) H   ( 511,X'S) 
RIDE C   (  53,X'S) H   ( 532,X'S) H   ( 531,X'S) 
RIDE C   (  54,X'S) H   ( 541,X'S) H   ( 542,X'S) 
END                                                                             
;


_iucr_refine_instructions_details_restraints
;
#
# Punched on 05/10/12 at 08:29:21
#
#LIST     16                                                                    
NO 
REM   HREST   START (DO NOT REMOVE THIS LINE) 
REM   HREST   END (DO NOT REMOVE THIS LINE) 
END                                                                             
;


data_global 
_audit_creation_date        "2013-02-16"
_audit_creation_method CRYSTALS_ver_14.52

_oxford_structure_analysis_title  '003mk13 in P2(1)/c'
_chemical_name_systematic         .
_chemical_melting_point           .

data_nBu4NfcBMes2CNSiMe2OH
_cell_length_a                    12.81313(12)
_cell_length_b                    17.36807(16)
_cell_length_c                    20.2116(2)
_cell_angle_alpha                 90
_cell_angle_beta                  90.3773(10)
_cell_angle_gamma                 90
_cell_volume                      4497.78(8)
 
_symmetry_cell_setting            'monoclinic' 
_symmetry_space_group_name_H-M    'P 21/c ' 
_symmetry_space_group_name_Hall   '-P 2ybc' 
loop_
 _symmetry_equiv_pos_as_xyz
 'x,y,z'
 '-x,-y,-z'
 'x,-y+1/2,z+1/2'
 '-x,y+1/2,-z+1/2'

loop_
_atom_type_symbol
_atom_type_scat_dispersion_real
_atom_type_scat_dispersion_imag
_atom_type_scat_Cromer_Mann_a1
_atom_type_scat_Cromer_Mann_b1
_atom_type_scat_Cromer_Mann_a2
_atom_type_scat_Cromer_Mann_b2
_atom_type_scat_Cromer_Mann_a3
_atom_type_scat_Cromer_Mann_b3
_atom_type_scat_Cromer_Mann_a4
_atom_type_scat_Cromer_Mann_b4
_atom_type_scat_Cromer_Mann_c
_atom_type_scat_source  
 C       0.0181   0.0091   2.3100  20.8439   1.0200  10.2075   1.5886   0.5687
   0.8650  51.6512   0.2156 'International Tables Vol C 4.2.6.8 and 6.1.1.4'
 H       0.0000   0.0000   0.4930  10.5109   0.3229  26.1257   0.1402   3.1424
   0.0408  57.7998   0.0030 'International Tables Vol C 4.2.6.8 and 6.1.1.4'
 B       0.0090   0.0039   2.0545  23.2185   1.3326   1.0210   1.0979  60.3498
   0.7068   0.1403  -0.1932 'International Tables Vol C 4.2.6.8 and 6.1.1.4'
 N       0.0311   0.0180  12.2126   0.0057   3.1322   9.8933   2.0125  28.9975
   1.1663   0.5826 -11.5290 'International Tables Vol C 4.2.6.8 and 6.1.1.4'
 O       0.0492   0.0322   3.0485  13.2771   2.2868   5.7011   1.5463   0.3239
   0.8670  32.9089   0.2508 'International Tables Vol C 4.2.6.8 and 6.1.1.4'
 F       0.0727   0.0534   3.5392  10.2825   2.6412   4.2944   1.5170   0.2615
   1.0243  26.1476   0.2776 'International Tables Vol C 4.2.6.8 and 6.1.1.4'
 Si      0.2541   0.3302   6.2915   2.4386   3.0353  32.3337   1.9891   0.6785
   1.5410  81.6937   1.1407 'International Tables Vol C 4.2.6.8 and 6.1.1.4'
 K       0.3868   1.0657   8.2186  12.7949   7.4398   0.7748   1.0519 213.1870
   0.8659  41.6841   1.4228 'International Tables Vol C 4.2.6.8 and 6.1.1.4'
 Fe     -1.1336   3.1974  11.7695   4.7611   7.3573   0.3072   3.5222  15.3535
   2.3045  76.8805   1.0369 'International Tables Vol C 4.2.6.8 and 6.1.1.4'
 
 
_cell_formula_units_Z                    4

# Given Formula = C45 H30 B1.50 F3 Fe1.50 K1.50 N1.50 O10.50 Si1.50 
# Dc =      1.50 Fooo =   1684.35 Mu =     61.92 M =   1017.49
# Found Formula = C47 H72.09 B1 Fe1 N2 O1 Si1 
# Dc =      1.15 FOOO =   1684.35 Mu =     31.96 M =    775.93

_chemical_formula_sum             'C47 H72.09 B1 Fe1 N2 O1 Si1'
_chemical_formula_moiety          'C47 H72.09 B1 Fe1 N2 O1 Si1'
_chemical_compound_source                .
_chemical_formula_weight            775.93
 
 
_cell_measurement_reflns_used        20141
_cell_measurement_theta_min              3
_cell_measurement_theta_max             76
_cell_measurement_temperature          150
 
_exptl_crystal_description        '?' 
_exptl_crystal_colour             'yellow' 
_exptl_crystal_size_min           0.060 
_exptl_crystal_size_mid           0.060 
_exptl_crystal_size_max           0.060 
 
_exptl_crystal_density_diffrn     1.146 
_exptl_crystal_density_meas       . 
_exptl_crystal_density_method     'not measured' 
# Non-dispersive F(000): 
_exptl_crystal_F_000              1684.348 
_exptl_absorpt_coefficient_mu     3.196 
 
# Sheldrick geometric approximatio 0.83 0.83 
_exptl_absorpt_correction_type    multi-scan 
_exptl_absorpt_process_details    'CrysAlis, (Oxford Diffraction, 2002)' 
_exptl_absorpt_correction_T_min   0.53 
_exptl_absorpt_correction_T_max   0.83 
_diffrn_measurement_device_type   'Oxford Diffraction SuperNova' 
_diffrn_measurement_device        'Area' 
_diffrn_radiation_monochromator   'graphite' 
_diffrn_radiation_type            'Cu K\a'
_diffrn_radiation_wavelength           1.54184
_diffrn_measurement_method        \w/2\q 
 
# If a reference occurs more than once, delete the author 
# and date from subsequent references. 
_computing_data_collection        'SuperNova, (Oxford Diffraction, 2010)' 
_computing_cell_refinement        'CrysAlis, (Oxford Diffraction, 2002)' 
_computing_data_reduction         'CrysAlis, (Oxford Diffraction, 2002)' 
_computing_structure_solution     'Superflip (Palatinus & Chapuis, 2007)' 
_computing_structure_refinement   'CRYSTALS (Betteridge et al., 2003)' 
_computing_publication_material   'CRYSTALS (Betteridge et al., 2003)' 
_computing_molecular_graphics     'CAMERON (Watkin et al., 1996)' 
 
_diffrn_standards_interval_time   . 
_diffrn_standards_interval_count  . 
_diffrn_standards_number          0 
_diffrn_standards_decay_%         ? 
 
_diffrn_ambient_temperature        150
_diffrn_reflns_number             48187 
_reflns_number_total              9386 
_diffrn_reflns_av_R_equivalents   0.036 
# Number of reflections without Friedels Law is 0 
# Number of reflections with Friedels Law is 9386 
# Theoretical number of reflections is about 18919 
 
 
_diffrn_reflns_theta_min          3.355 
_diffrn_reflns_theta_max          76.567 
_diffrn_measured_fraction_theta_max 0.992 
 
_diffrn_reflns_theta_full         75.036 
_diffrn_measured_fraction_theta_full 0.998 
 
 
_diffrn_reflns_limit_h_min        -13 
_diffrn_reflns_limit_h_max        16 
_diffrn_reflns_limit_k_min        -21 
_diffrn_reflns_limit_k_max        21 
_diffrn_reflns_limit_l_min        -25 
_diffrn_reflns_limit_l_max        25 
_reflns_limit_h_min               -16 
_reflns_limit_h_max               16 
_reflns_limit_k_min               0 
_reflns_limit_k_max               21 
_reflns_limit_l_min               0 
_reflns_limit_l_max               25 
 
_oxford_diffrn_Wilson_B_factor    2.50 
_oxford_diffrn_Wilson_scale       0.17 
 
_atom_sites_solution_primary      Other  #heavy,direct,difmap,geom
# _atom_sites_solution_secondary  difmap
_atom_sites_solution_hydrogens    difmap
 
_refine_diff_density_min          -0.85 
_refine_diff_density_max          1.54 
 
 
# The current dictionary definitions do not cover the 
# situation where the reflections used for refinement were 
# selected by a user-defined sigma threshold 
 
 
# The values actually used during refinement 
_oxford_reflns_threshold_expression_ref     I>-3.0\s(I)
_refine_ls_number_reflns          9346 
_refine_ls_number_restraints      68 
_refine_ls_number_parameters      496 
_oxford_refine_ls_R_factor_ref    0.0599 
_refine_ls_wR_factor_ref          0.1317 
_refine_ls_goodness_of_fit_ref    0.8767 
_refine_ls_shift/su_max           0.0093968 
_refine_ls_shift/su_mean          0.0002198 
 
 
# The values computed with all filters except I/sigma 
_oxford_reflns_number_all         9347 
_refine_ls_R_factor_all           0.0599 
_refine_ls_wR_factor_all          0.1317 
 
# The values computed with a 2 sigma cutoff - a la SHELX 
_reflns_threshold_expression      I>2.0\s(I)
_reflns_number_gt                 8232 
_refine_ls_R_factor_gt            0.0537 
_refine_ls_wR_factor_gt           0.1239 
 
# choose from: rm (reference molecule of known chirality), 
# ad (anomolous dispersion - Flack), rmad (rm and ad), 
# syn (from synthesis), unk (unknown) or . (not applicable). 
_chemical_absolute_configuration  '.' 
 
 
_refine_ls_structure_factor_coef  Fsqd 
_refine_ls_matrix_type            full
_refine_ls_hydrogen_treatment     constr         #undef, noref, refall,
                                                 # refxyz, refU, constr or mixed
_refine_ls_weighting_scheme       calc 
_refine_ls_weighting_details 
;
 Method, part 1, Chebychev polynomial, (Watkin, 1994, Prince, 1982) 
 [weight] = 1.0/[A~0~*T~0~(x)+A~1~*T~1~(x) ... +A~n-1~]*T~n-1~(x)] 
 where A~i~ are the Chebychev coefficients listed below and x= Fcalc/Fmax 
 Method = Robust Weighting (Prince, 1982) 
 W = [weight] * [1-(deltaF/6*sigmaF)^2^]^2^ 
 A~i~ are: 
 0.214E+04 0.352E+04 0.213E+04 862. 201. 
;
# Insert your own references if required - in alphabetical order 
_publ_section_references 
; 
Betteridge, P.W., Carruthers, J.R., Cooper, R.I., 
Prout, K. & Watkin, D.J. (2003). J. Appl. Cryst. 36, 1487. 
 
Oxford Diffraction, (2010). CrysAlisPro. 
 
Oxford Diffraction, (2010). Supernova User Manual. 
 
Palatinus, L. & Chapuis, G. (2007). J. Appl. Cryst. 40, 786-790. 
 
Prince, E. 
Mathematical Techniques in Crystallography 
and Materials Science 
Springer-Verlag, New York, 1982. 
 
Watkin D.J. (1994). 
Acta Cryst, A50, 411-437. 
 
Watkin, D.J., Prout, C.K. & Pearce, L.J. (1996). CAMERON, Chemical 
Crystallography Laboratory, Oxford, UK. 
; 

# Uequiv = arithmetic mean of Ui i.e. Ueqiv = (U1+U2+U3)/3

# Replace last . with number of unfound hydrogen atoms attached to an atom.

# ..._refinement_flags_... 
# . no refinement constraints           S special position constraint on site
# G rigid group refinement of site      R riding atom
# D distance or angle restraint on site T thermal displacement constraints
# U Uiso or Uij restraint (rigid bond)  P partial occupancy constraint


loop_
_atom_site_label
_atom_site_type_symbol
_atom_site_fract_x
_atom_site_fract_y
_atom_site_fract_z
_atom_site_U_iso_or_equiv
_atom_site_occupancy
_atom_site_adp_type
_atom_site_refinement_flags_posn
_atom_site_refinement_flags_adp
_atom_site_refinement_flags_occupancy
_atom_site_disorder_assembly
_atom_site_disorder_group
_atom_site_attached_hydrogens
C302 C 0.1368(3) 0.3892(2) 0.35428(18) 0.0631 1.0000 Uani D . . . . . 
C303 C 0.1140(2) 0.32565(17) 0.30478(13) 0.0369 1.0000 Uani . . . . . . 
Fe1 Fe 0.79503(3) 0.38885(2) 0.171965(19) 0.0292 1.0000 Uani . . . . . . 
C2 C 0.71971(17) 0.31382(12) 0.10778(11) 0.0277 1.0000 Uani D . . . . . 
C3 C 0.76270(16) 0.27033(12) 0.16173(11) 0.0232 1.0000 Uani . . . . . . 
C4 C 0.87285(17) 0.28678(13) 0.16369(11) 0.0264 1.0000 Uani . . . . . . 
C5 C 0.89992(19) 0.33684(15) 0.11086(12) 0.0331 1.0000 Uani . . . . . . 
C6 C 0.80632(19) 0.35421(15) 0.07615(12) 0.0328 1.0000 Uani . . . . . . 
B7 B 0.70694(19) 0.20674(15) 0.20962(12) 0.0249 1.0000 Uani . . . . . . 
C8 C 0.78063(17) 0.19443(13) 0.27693(11) 0.0264 1.0000 Uani . . . . . . 
C9 C 0.87254(17) 0.14912(13) 0.27274(11) 0.0268 1.0000 Uani . . . . . . 
C10 C 0.94184(18) 0.14163(15) 0.32620(12) 0.0318 1.0000 Uani . . . . . . 
C11 C 0.9244(2) 0.17633(17) 0.38647(12) 0.0361 1.0000 Uani . . . . . . 
C12 C 0.8344(2) 0.21938(17) 0.39203(12) 0.0388 1.0000 Uani . . . . . . 
C13 C 0.7636(2) 0.22891(16) 0.33970(12) 0.0336 1.0000 Uani . . . . . . 
C14 C 0.6679(2) 0.2760(2) 0.35591(14) 0.0483 1.0000 Uani . . . . . . 
C15 C 0.9992(2) 0.1655(2) 0.44393(14) 0.0519 1.0000 Uani . . . . . . 
C16 C 0.9025(2) 0.10480(15) 0.21129(13) 0.0340 1.0000 Uani . . . . . . 
C17 C 0.67434(18) 0.12369(14) 0.17268(12) 0.0287 1.0000 Uani . . . . . . 
C18 C 0.6985(2) 0.10059(14) 0.10687(13) 0.0327 1.0000 Uani . . . . . . 
C19 C 0.6562(2) 0.03331(15) 0.07967(15) 0.0413 1.0000 Uani . . . . . . 
C20 C 0.5911(2) -0.01503(16) 0.11420(18) 0.0478 1.0000 Uani . . . . . . 
C21 C 0.5416(3) -0.0846(2) 0.0813(2) 0.0730 1.0000 Uani . . . . . . 
C22 C 0.5715(2) 0.00391(16) 0.17915(18) 0.0469 1.0000 Uani . . . . . . 
C23 C 0.61050(19) 0.07139(15) 0.20870(14) 0.0365 1.0000 Uani . . . . . . 
C24 C 0.5777(2) 0.08527(18) 0.27952(15) 0.0463 1.0000 Uani . . . . . . 
C25 C 0.7690(2) 0.14422(16) 0.06045(13) 0.0383 1.0000 Uani . . . . . . 
C26 C 0.59339(18) 0.24374(15) 0.22367(12) 0.0321 1.0000 Uani . . . . . . 
N27 N 0.51130(18) 0.27035(16) 0.22647(13) 0.0467 1.0000 Uani . . . . . . 
Si28 Si 0.58652(5) 0.32874(4) 0.07178(4) 0.0367 1.0000 Uani D . . . . . 
O29 O 0.50993(19) 0.38870(14) 0.11682(13) 0.0599 1.0000 Uani . . . . . . 
C201 C 0.5184(2) 0.23596(19) 0.05745(18) 0.0567 1.0000 Uani D . . . . . 
C32 C 0.7005(3) 0.44066(17) 0.23998(17) 0.0502 1.0000 Uani . . . . . . 
C33 C 0.7111(2) 0.48824(16) 0.18388(18) 0.0501 1.0000 Uani . . . . . . 
C34 C 0.8185(3) 0.50493(16) 0.17585(18) 0.0507 1.0000 Uani . . . . . . 
C35 C 0.8748(3) 0.46751(16) 0.22771(17) 0.0490 1.0000 Uani . . . . . . 
C36 C 0.8012(3) 0.42763(17) 0.26756(16) 0.0486 1.0000 Uani . . . . . . 
N37 N 0.20899(15) 0.29679(12) 0.26688(10) 0.0290 1.0000 Uani . . . . . . 
C42 C 0.17262(19) 0.22857(15) 0.22543(13) 0.0336 1.0000 Uani . . . . . . 
C43 C 0.2553(2) 0.18966(18) 0.18464(15) 0.0451 1.0000 Uani . . . . . . 
C44 C 0.2084(3) 0.12448(19) 0.14416(17) 0.0541 1.0000 Uani . . . . . . 
C45 C 0.2870(4) 0.0815(3) 0.1028(2) 0.0786 1.0000 Uani . . . . . . 
C46 C 0.29578(18) 0.27282(15) 0.31428(12) 0.0312 1.0000 Uani . . . . . . 
C47 C 0.2645(2) 0.21230(17) 0.36416(14) 0.0399 1.0000 Uani . . . . . . 
C48 C 0.3528(2) 0.1888(2) 0.40876(15) 0.0498 1.0000 Uani . . . . . . 
C49 C 0.3173(3) 0.1355(2) 0.46357(16) 0.0532 1.0000 Uani . . . . . . 
C50 C 0.2536(2) 0.36015(15) 0.22295(12) 0.0333 1.0000 Uani . . . . . . 
C51 C 0.1818(2) 0.38525(15) 0.16692(13) 0.0372 1.0000 Uani . . . . . . 
C52 C 0.2183(2) 0.45960(17) 0.13521(14) 0.0444 1.0000 Uani . . . . . . 
C53 C 0.1475(3) 0.48299(18) 0.07803(14) 0.0493 1.0000 Uani . . . . . . 
C200 C 0.5977(2) 0.3737(4) -0.00738(18) 0.1086 1.0000 Uani D . . . . . 
C211 C 0.0093(9) 0.3803(5) 0.4405(5) 0.0945 0.4365 Uani D . . 1 2 . 
C210 C 0.0386(5) 0.4594(4) 0.4433(4) 0.0746 0.5635 Uani D . . 1 1 . 
C220 C 0.0269(4) 0.4030(5) 0.3872(4) 0.0539 0.5435 Uani D . . 1 1 . 
C221 C 0.0509(8) 0.4302(4) 0.3895(5) 0.0594 0.4565 Uani D . . 1 2 . 
H3031 H 0.0849 0.2816 0.3276 0.0435 1.0000 Uiso R . . . . . 
H3032 H 0.0636 0.3440 0.2726 0.0439 1.0000 Uiso R . . . . . 
H41 H 0.9220 0.2656 0.1966 0.0314 1.0000 Uiso R . . . . . 
H51 H 0.9697 0.3571 0.1016 0.0401 1.0000 Uiso R . . . . . 
H61 H 0.8021 0.3886 0.0381 0.0393 1.0000 Uiso R . . . . . 
H101 H 1.0020 0.1111 0.3207 0.0378 1.0000 Uiso R . . . . . 
H121 H 0.8207 0.2441 0.4322 0.0469 1.0000 Uiso R . . . . . 
H141 H 0.6744 0.2976 0.3995 0.0730 1.0000 Uiso R . . . . . 
H142 H 0.6595 0.3169 0.3244 0.0722 1.0000 Uiso R . . . . . 
H143 H 0.6047 0.2449 0.3550 0.0727 1.0000 Uiso R . . . . . 
H151 H 1.0054 0.2114 0.4686 0.0787 1.0000 Uiso R . . . . . 
H152 H 1.0681 0.1521 0.4286 0.0785 1.0000 Uiso R . . . . . 
H153 H 0.9755 0.1255 0.4740 0.0789 1.0000 Uiso R . . . . . 
H161 H 0.9730 0.0859 0.2144 0.0508 1.0000 Uiso R . . . . . 
H162 H 0.8979 0.1350 0.1718 0.0509 1.0000 Uiso R . . . . . 
H163 H 0.8585 0.0610 0.2046 0.0511 1.0000 Uiso R . . . . . 
H191 H 0.6728 0.0207 0.0350 0.0506 1.0000 Uiso R . . . . . 
H211 H 0.5166 -0.1199 0.1142 0.1097 1.0000 Uiso R . . . . . 
H212 H 0.5917 -0.1109 0.0536 0.1100 1.0000 Uiso R . . . . . 
H213 H 0.4829 -0.0684 0.0551 0.1102 1.0000 Uiso R . . . . . 
H221 H 0.5306 -0.0291 0.2051 0.0564 1.0000 Uiso R . . . . . 
H241 H 0.5599 0.0373 0.3006 0.0696 1.0000 Uiso R . . . . . 
H242 H 0.6329 0.1084 0.3044 0.0695 1.0000 Uiso R . . . . . 
H243 H 0.5175 0.1186 0.2813 0.0700 1.0000 Uiso R . . . . . 
H253 H 0.7946 0.1099 0.0269 0.0581 1.0000 Uiso R . . . . . 
H252 H 0.8277 0.1658 0.0828 0.0580 1.0000 Uiso R . . . . . 
H251 H 0.7320 0.1858 0.0387 0.0583 1.0000 Uiso R . . . . . 
H2011 H 0.4470 0.2469 0.0474 0.0844 1.0000 Uiso R . . . . . 
H2012 H 0.5498 0.2117 0.0197 0.0854 1.0000 Uiso R . . . . . 
H2013 H 0.5218 0.2031 0.0959 0.0854 1.0000 Uiso R . . . . . 
H321 H 0.6347 0.4183 0.2551 0.0598 1.0000 Uiso R . . . . . 
H331 H 0.6548 0.5065 0.1554 0.0601 1.0000 Uiso R . . . . . 
H341 H 0.8498 0.5350 0.1394 0.0613 1.0000 Uiso R . . . . . 
H351 H 0.9506 0.4681 0.2345 0.0589 1.0000 Uiso R . . . . . 
H361 H 0.8177 0.3976 0.3066 0.0583 1.0000 Uiso R . . . . . 
H421 H 0.1429 0.1919 0.2558 0.0405 1.0000 Uiso R . . . . . 
H422 H 0.1158 0.2464 0.1964 0.0397 1.0000 Uiso R . . . . . 
H431 H 0.3074 0.1675 0.2139 0.0549 1.0000 Uiso R . . . . . 
H432 H 0.2862 0.2267 0.1552 0.0545 1.0000 Uiso R . . . . . 
H441 H 0.1739 0.0887 0.1741 0.0654 1.0000 Uiso R . . . . . 
H442 H 0.1568 0.1469 0.1132 0.0652 1.0000 Uiso R . . . . . 
H451 H 0.2538 0.0386 0.0805 0.1178 1.0000 Uiso R . . . . . 
H452 H 0.3438 0.0632 0.1311 0.1185 1.0000 Uiso R . . . . . 
H453 H 0.3160 0.1155 0.0694 0.1180 1.0000 Uiso R . . . . . 
H461 H 0.3170 0.3193 0.3374 0.0382 1.0000 Uiso R . . . . . 
H462 H 0.3534 0.2549 0.2878 0.0378 1.0000 Uiso R . . . . . 
H471 H 0.2089 0.2314 0.3912 0.0489 1.0000 Uiso R . . . . . 
H472 H 0.2412 0.1676 0.3401 0.0493 1.0000 Uiso R . . . . . 
H481 H 0.3857 0.2331 0.4271 0.0608 1.0000 Uiso R . . . . . 
H482 H 0.4033 0.1616 0.3815 0.0614 1.0000 Uiso R . . . . . 
H491 H 0.3729 0.1235 0.4939 0.0796 1.0000 Uiso R . . . . . 
H492 H 0.2638 0.1609 0.4883 0.0803 1.0000 Uiso R . . . . . 
H493 H 0.2892 0.0888 0.4447 0.0800 1.0000 Uiso R . . . . . 
H501 H 0.2683 0.4039 0.2505 0.0399 1.0000 Uiso R . . . . . 
H502 H 0.3186 0.3416 0.2046 0.0396 1.0000 Uiso R . . . . . 
H511 H 0.1117 0.3936 0.1832 0.0452 1.0000 Uiso R . . . . . 
H512 H 0.1792 0.3450 0.1328 0.0454 1.0000 Uiso R . . . . . 
H521 H 0.2211 0.4993 0.1690 0.0532 1.0000 Uiso R . . . . . 
H522 H 0.2884 0.4519 0.1191 0.0532 1.0000 Uiso R . . . . . 
H531 H 0.1701 0.5315 0.0601 0.0739 1.0000 Uiso R . . . . . 
H532 H 0.0759 0.4900 0.0935 0.0736 1.0000 Uiso R . . . . . 
H533 H 0.1485 0.4444 0.0440 0.0735 1.0000 Uiso R . . . . . 
H2001 H 0.5414 0.3938 -0.0287 0.1627 1.0000 Uiso R . . . . . 
H2002 H 0.6332 0.4188 -0.0107 0.1590 1.0000 Uiso R . . . . . 
H2003 H 0.6314 0.3463 -0.0370 0.1617 1.0000 Uiso R . . . . . 
H2111 H -0.0385 0.4088 0.4682 0.1420 0.4365 Uiso R . . 1 2 . 
H2112 H 0.0679 0.3619 0.4662 0.1414 0.4365 Uiso R . . 1 2 . 
H2113 H -0.0263 0.3375 0.4192 0.1421 0.4365 Uiso R . . 1 2 . 
H2101 H -0.0301 0.4729 0.4595 0.1119 0.5635 Uiso R . . 1 1 . 
H2102 H 0.0738 0.5056 0.4282 0.1121 0.5635 Uiso R . . 1 1 . 
H2103 H 0.0791 0.4354 0.4786 0.1121 0.5635 Uiso R . . 1 1 . 
H2201 H -0.0211 0.4243 0.3546 0.0666 0.5435 Uiso R . . 1 1 . 
H2202 H -0.0019 0.3545 0.4028 0.0664 0.5435 Uiso R . . 1 1 . 
H2211 H 0.0768 0.4776 0.4090 0.0733 0.4565 Uiso R . . 1 2 . 
H2212 H -0.0034 0.4437 0.3578 0.0734 0.4565 Uiso R . . 1 2 . 
H28 H 0.4983 0.3789 0.1589 0.0905 1.0000 Uiso R . . . . . 
H3021 H 0.1865 0.3706 0.3871 0.0769 0.5435 Uiso R . . . . . 
H3022 H 0.1669 0.4321 0.3305 0.0769 0.5435 Uiso R . . . . . 
loop_
_atom_site_aniso_label
_atom_site_aniso_U_11
_atom_site_aniso_U_22
_atom_site_aniso_U_33
_atom_site_aniso_U_23
_atom_site_aniso_U_13
_atom_site_aniso_U_12
C302 0.064(2) 0.065(2) 0.060(2) -0.0206(17) 0.0043(17) 0.0180(17) 
C303 0.0292(12) 0.0453(15) 0.0363(13) 0.0047(11) 0.0020(10) 0.0045(11) 
Fe1 0.02571(19) 0.02280(19) 0.0391(2) 0.00045(14) -0.00428(15) -0.00223(14) 
C2 0.0239(10) 0.0289(11) 0.0302(11) 0.0013(9) -0.0021(9) 0.0002(9) 
C3 0.0205(10) 0.0226(10) 0.0267(10) -0.0019(8) -0.0011(8) 0.0008(8) 
C4 0.0201(10) 0.0288(11) 0.0302(11) 0.0010(9) 0.0001(8) 0.0018(8) 
C5 0.0244(11) 0.0393(13) 0.0358(12) 0.0071(10) 0.0025(9) -0.0037(10) 
C6 0.0316(12) 0.0359(13) 0.0309(12) 0.0075(10) -0.0016(9) -0.0023(10) 
B7 0.0203(11) 0.0266(12) 0.0277(12) 0.0017(10) 0.0010(9) 0.0002(9) 
C8 0.0237(10) 0.0284(11) 0.0271(11) 0.0032(9) 0.0017(8) -0.0011(9) 
C9 0.0248(11) 0.0276(11) 0.0279(11) 0.0050(9) 0.0019(8) -0.0004(9) 
C10 0.0242(11) 0.0382(13) 0.0330(12) 0.0101(10) 0.0006(9) -0.0008(10) 
C11 0.0298(12) 0.0504(15) 0.0281(11) 0.0094(11) -0.0018(9) -0.0107(11) 
C12 0.0410(14) 0.0514(16) 0.0240(11) -0.0018(11) 0.0037(10) -0.0049(12) 
C13 0.0313(12) 0.0413(14) 0.0282(11) 0.0009(10) 0.0047(9) 0.0001(10) 
C14 0.0494(17) 0.0608(19) 0.0346(14) -0.0076(13) 0.0063(12) 0.0172(15) 
C15 0.0366(15) 0.086(2) 0.0333(14) 0.0098(15) -0.0049(11) -0.0116(15) 
C16 0.0311(12) 0.0346(13) 0.0364(13) -0.0011(10) -0.0005(10) 0.0101(10) 
C17 0.0237(11) 0.0258(11) 0.0363(12) 0.0048(9) -0.0054(9) -0.0004(9) 
C18 0.0337(13) 0.0263(11) 0.0378(13) -0.0002(10) -0.0084(10) 0.0024(10) 
C19 0.0441(15) 0.0299(13) 0.0496(15) -0.0050(11) -0.0175(12) 0.0034(11) 
C20 0.0394(15) 0.0300(13) 0.074(2) -0.0026(13) -0.0247(14) -0.0016(11) 
C21 0.069(2) 0.0366(17) 0.112(3) -0.0069(19) -0.042(2) -0.0123(16) 
C22 0.0308(13) 0.0324(14) 0.077(2) 0.0130(14) -0.0119(13) -0.0091(11) 
C23 0.0266(12) 0.0326(13) 0.0502(15) 0.0107(11) -0.0058(10) -0.0032(10) 
C24 0.0399(15) 0.0459(16) 0.0531(17) 0.0186(13) 0.0063(12) -0.0074(12) 
C25 0.0487(15) 0.0353(13) 0.0311(12) -0.0058(10) 0.0015(11) 0.0025(12) 
C26 0.0254(12) 0.0351(13) 0.0357(12) 0.0042(10) 0.0041(9) -0.0016(10) 
N27 0.0280(11) 0.0599(16) 0.0523(14) 0.0086(12) 0.0065(10) 0.0087(11) 
Si28 0.0252(3) 0.0470(4) 0.0377(4) 0.0067(3) -0.0068(3) 0.0049(3) 
O29 0.0488(13) 0.0641(15) 0.0670(15) -0.0038(12) 0.0022(11) 0.0024(11) 
C201 0.0409(16) 0.063(2) 0.066(2) -0.0137(16) -0.0252(14) 0.0019(14) 
C32 0.0500(17) 0.0367(15) 0.0640(19) -0.0161(14) 0.0071(14) 0.0044(13) 
C33 0.0443(16) 0.0272(13) 0.079(2) -0.0063(14) -0.0089(15) 0.0076(12) 
C34 0.0500(17) 0.0241(13) 0.078(2) -0.0002(13) -0.0117(15) -0.0064(12) 
C35 0.0471(16) 0.0318(14) 0.068(2) -0.0110(13) -0.0149(14) -0.0060(12) 
C36 0.0601(19) 0.0373(15) 0.0482(16) -0.0169(13) -0.0048(14) -0.0002(13) 
N37 0.0239(9) 0.0325(10) 0.0307(10) 0.0016(8) -0.0009(8) -0.0037(8) 
C42 0.0306(12) 0.0335(13) 0.0365(12) 0.0011(10) -0.0042(10) -0.0073(10) 
C43 0.0396(15) 0.0452(16) 0.0506(16) -0.0105(13) -0.0001(12) -0.0029(12) 
C44 0.064(2) 0.0457(17) 0.0529(18) -0.0124(14) 0.0049(15) -0.0098(15) 
C45 0.089(3) 0.065(2) 0.081(3) -0.031(2) 0.018(2) -0.008(2) 
C46 0.0248(11) 0.0363(13) 0.0324(12) 0.0027(10) -0.0030(9) -0.0026(9) 
C47 0.0312(13) 0.0431(15) 0.0455(15) 0.0116(12) -0.0045(11) -0.0041(11) 
C48 0.0417(16) 0.0590(19) 0.0485(16) 0.0183(14) -0.0138(13) -0.0122(14) 
C49 0.0509(18) 0.0570(19) 0.0515(17) 0.0196(15) -0.0167(14) -0.0111(15) 
C50 0.0322(12) 0.0342(13) 0.0335(12) 0.0036(10) 0.0001(10) -0.0062(10) 
C51 0.0394(14) 0.0362(14) 0.0361(13) 0.0052(10) -0.0031(11) -0.0024(11) 
C52 0.0528(17) 0.0372(14) 0.0430(15) 0.0079(12) 0.0007(13) -0.0042(13) 
C53 0.065(2) 0.0442(16) 0.0392(14) 0.0101(12) 0.0042(13) 0.0090(14) 
C200 0.0317(17) 0.246(6) 0.0479(19) -0.005(3) -0.0142(15) 0.036(3) 
C211 0.138(8) 0.066(5) 0.080(6) -0.026(4) 0.054(6) -0.031(5) 
C210 0.076(4) 0.074(4) 0.075(4) -0.026(3) 0.019(3) -0.003(4) 
C220 0.051(4) 0.053(4) 0.057(4) -0.014(3) 0.002(3) 0.009(3) 
C221 0.073(5) 0.056(5) 0.049(4) -0.018(4) 0.010(4) 0.011(4) 

_refine_ls_extinction_method 
    'None'
_oxford_refine_ls_scale 3.47(3) 
loop_
 _geom_bond_atom_site_label_1
 _geom_bond_site_symmetry_1
 _geom_bond_atom_site_label_2
 _geom_bond_site_symmetry_2
 _geom_bond_distance
 _geom_bond_publ_flag
C302 . C303 . 1.517(4)    yes
C302 . C220 . 1.579(6)    yes
C302 . H3021 . 0.972    no
C302 . H3022 . 0.968    no
C302 . C303 . 1.517(4)    yes
C302 . C221 . 1.494(7)    yes
C302 . H3021 . 0.972    no
C302 . H3022 . 0.968    no
C303 . N37 . 1.527(3)    yes
C303 . H3031 . 0.970    no
C303 . H3032 . 0.968    no
Fe1 . C2 . 2.073(2)    yes
Fe1 . C3 . 2.110(2)    yes
Fe1 . C4 . 2.041(2)    yes
Fe1 . C5 . 2.042(3)    yes
Fe1 . C6 . 2.034(3)    yes
Fe1 . C32 . 2.047(3)    yes
Fe1 . C33 . 2.049(3)    yes
Fe1 . C34 . 2.040(3)    yes
Fe1 . C35 . 2.041(3)    yes
Fe1 . C36 . 2.047(3)    yes
C2 . C3 . 1.433(3)    yes
C2 . C6 . 1.463(3)    yes
C2 . Si28 . 1.869(2)    yes
C3 . C4 . 1.440(3)    yes
C3 . B7 . 1.636(3)    yes
C4 . C5 . 1.422(3)    yes
C4 . H41 . 0.985    no
C5 . C6 . 1.418(3)    yes
C5 . H51 . 0.980    no
C6 . H61 . 0.975    no
B7 . C8 . 1.665(3)    yes
B7 . C17 . 1.676(3)    yes
B7 . C26 . 1.617(3)    yes
C8 . C9 . 1.419(3)    yes
C8 . C13 . 1.421(3)    yes
C9 . C10 . 1.400(3)    yes
C9 . C16 . 1.513(3)    yes
C10 . C11 . 1.379(4)    yes
C10 . H101 . 0.943    no
C11 . C12 . 1.380(4)    yes
C11 . C15 . 1.513(4)    yes
C12 . C13 . 1.399(4)    yes
C12 . H121 . 0.937    no
C13 . C14 . 1.512(4)    yes
C14 . H141 . 0.960    no
C14 . H142 . 0.960    no
C14 . H143 . 0.974    no
C15 . H151 . 0.944    no
C15 . H152 . 0.965    no
C15 . H153 . 0.972    no
C16 . H161 . 0.962    no
C16 . H162 . 0.956    no
C16 . H163 . 0.956    no
C17 . C18 . 1.425(4)    yes
C17 . C23 . 1.426(3)    yes
C18 . C19 . 1.399(4)    yes
C18 . C25 . 1.511(4)    yes
C19 . C20 . 1.376(4)    yes
C19 . H191 . 0.955    no
C20 . C21 . 1.516(4)    yes
C20 . C22 . 1.378(5)    yes
C21 . H211 . 0.961    no
C21 . H212 . 0.969    no
C21 . H213 . 0.959    no
C22 . C23 . 1.406(4)    yes
C22 . H221 . 0.939    no
C23 . C24 . 1.514(4)    yes
C24 . H241 . 0.963    no
C24 . H242 . 0.954    no
C24 . H243 . 0.966    no
C25 . H253 . 0.962    no
C25 . H252 . 0.952    no
C25 . H251 . 0.968    no
C26 . N27 . 1.151(3)    yes
Si28 . O29 . 1.699(3)    yes
Si28 . C201 . 1.855(3)    yes
Si28 . C200 . 1.787(4)    yes
O29 . H28 . 0.881    no
C201 . H2011 . 0.956    no
C201 . H2012 . 0.962    no
C201 . H2013 . 0.964    no
C32 . C33 . 1.410(5)    yes
C32 . C36 . 1.420(5)    yes
C32 . H321 . 0.979    no
C33 . C34 . 1.416(4)    yes
C33 . H331 . 0.973    no
C34 . C35 . 1.425(5)    yes
C34 . H341 . 0.990    no
C35 . C36 . 1.424(5)    yes
C35 . H351 . 0.980    no
C36 . H361 . 0.968    no
N37 . C42 . 1.522(3)    yes
N37 . C46 . 1.521(3)    yes
N37 . C50 . 1.528(3)    yes
C42 . C43 . 1.507(4)    yes
C42 . H421 . 0.965    no
C42 . H422 . 0.981    no
C43 . C44 . 1.519(4)    yes
C43 . H431 . 0.969    no
C43 . H432 . 0.963    no
C44 . C45 . 1.511(5)    yes
C44 . H441 . 0.974    no
C44 . H442 . 0.987    no
C45 . H451 . 0.968    no
C45 . H452 . 0.976    no
C45 . H453 . 0.972    no
C46 . C47 . 1.512(3)    yes
C46 . H461 . 0.971    no
C46 . H462 . 0.966    no
C47 . C48 . 1.499(4)    yes
C47 . H471 . 0.960    no
C47 . H472 . 0.963    no
C48 . C49 . 1.515(4)    yes
C48 . H481 . 0.952    no
C48 . H482 . 0.974    no
C49 . H491 . 0.960    no
C49 . H492 . 0.959    no
C49 . H493 . 0.966    no
C50 . C51 . 1.519(4)    yes
C50 . H501 . 0.960    no
C50 . H502 . 0.968    no
C51 . C52 . 1.517(4)    yes
C51 . H511 . 0.969    no
C51 . H512 . 0.982    no
C52 . C53 . 1.520(4)    yes
C52 . H521 . 0.972    no
C52 . H522 . 0.967    no
C53 . H531 . 0.962    no
C53 . H532 . 0.979    no
C53 . H533 . 0.960    no
C200 . H2001 . 0.907    no
C200 . H2002 . 0.909    no
C200 . H2003 . 0.881    no
C211 . C221 . 1.451(8)    yes
C211 . H2111 . 0.969    no
C211 . H2112 . 0.965    no
C211 . H2113 . 0.970    no
C210 . C220 . 1.505(7)    yes
C210 . H2101 . 0.970    no
C210 . H2102 . 0.970    no
C210 . H2103 . 0.973    no
C220 . H2201 . 0.971    no
C220 . H2202 . 0.972    no
C221 . H2211 . 0.971    no
C221 . H2212 . 0.971    no
loop_
 _geom_angle_atom_site_label_1
 _geom_angle_site_symmetry_1
 _geom_angle_atom_site_label_2
 _geom_angle_site_symmetry_2
 _geom_angle_atom_site_label_3
 _geom_angle_site_symmetry_3
 _geom_angle
 _geom_angle_publ_flag
C303 . C302 . C220 . 102.8(3)    yes
C303 . C302 . H3021 . 109.2    no
C220 . C302 . H3021 . 110.2    no
C303 . C302 . H3022 . 107.9    no
C220 . C302 . H3022 . 116.9    no
H3021 . C302 . H3022 . 109.5    no
C303 . C302 . C221 . 121.4(5)    yes
C303 . C302 . H3021 . 109.2    no
C221 . C302 . H3021 . 108.4    no
C303 . C302 . H3022 . 107.9    no
C221 . C302 . H3022 . 99.7    no
H3021 . C302 . H3022 . 109.5    no
C302 . C303 . N37 . 114.8(2)    yes
C302 . C303 . H3031 . 109.5    no
N37 . C303 . H3031 . 106.9    no
C302 . C303 . H3032 . 109.1    no
N37 . C303 . H3032 . 107.5    no
H3031 . C303 . H3032 . 108.8    no
C2 . Fe1 . C3 . 40.08(8)    yes
C2 . Fe1 . C4 . 68.18(9)    yes
C3 . Fe1 . C4 . 40.57(8)    yes
C2 . Fe1 . C5 . 69.45(9)    yes
C3 . Fe1 . C5 . 68.82(9)    yes
C4 . Fe1 . C5 . 40.75(9)    yes
C2 . Fe1 . C6 . 41.74(9)    yes
C3 . Fe1 . C6 . 68.48(9)    yes
C4 . Fe1 . C6 . 68.12(10)    yes
C5 . Fe1 . C6 . 40.72(10)    yes
C2 . Fe1 . C32 . 114.93(11)    yes
C3 . Fe1 . C32 . 112.22(11)    yes
C4 . Fe1 . C32 . 136.76(12)    yes
C5 . Fe1 . C32 . 174.62(12)    yes
C6 . Fe1 . C32 . 144.65(12)    yes
C2 . Fe1 . C33 . 111.14(11)    yes
C3 . Fe1 . C33 . 136.94(11)    yes
C4 . Fe1 . C33 . 176.72(12)    yes
C5 . Fe1 . C33 . 142.36(12)    yes
C6 . Fe1 . C33 . 113.68(13)    yes
C2 . Fe1 . C34 . 135.51(11)    yes
C3 . Fe1 . C34 . 175.53(11)    yes
C4 . Fe1 . C34 . 142.15(11)    yes
C5 . Fe1 . C34 . 111.30(13)    yes
C6 . Fe1 . C34 . 108.52(13)    yes
C2 . Fe1 . C35 . 174.75(12)    yes
C3 . Fe1 . C35 . 143.58(11)    yes
C4 . Fe1 . C35 . 112.55(11)    yes
C5 . Fe1 . C35 . 107.51(12)    yes
C6 . Fe1 . C35 . 133.25(12)    yes
C2 . Fe1 . C36 . 144.33(11)    yes
C3 . Fe1 . C36 . 114.83(11)    yes
C4 . Fe1 . C36 . 110.33(11)    yes
C5 . Fe1 . C36 . 134.04(12)    yes
C6 . Fe1 . C36 . 173.42(12)    yes
C32 . Fe1 . C33 . 40.29(14)    yes
C32 . Fe1 . C34 . 68.11(14)    yes
C33 . Fe1 . C34 . 40.54(12)    yes
C32 . Fe1 . C35 . 68.37(13)    yes
C33 . Fe1 . C35 . 68.44(12)    yes
C34 . Fe1 . C35 . 40.89(13)    yes
C32 . Fe1 . C36 . 40.59(13)    yes
C33 . Fe1 . C36 . 68.21(14)    yes
C34 . Fe1 . C36 . 68.51(14)    yes
C35 . Fe1 . C36 . 40.78(13)    yes
Fe1 . C2 . C3 . 71.35(12)    yes
Fe1 . C2 . C6 . 67.71(13)    yes
C3 . C2 . C6 . 107.23(19)    yes
Fe1 . C2 . Si28 . 125.22(11)    yes
C3 . C2 . Si28 . 135.61(16)    yes
C6 . C2 . Si28 . 117.16(16)    yes
Fe1 . C3 . C2 . 68.58(12)    yes
Fe1 . C3 . C4 . 67.17(12)    yes
C2 . C3 . C4 . 106.73(19)    yes
Fe1 . C3 . B7 . 133.39(15)    yes
C2 . C3 . B7 . 129.69(19)    yes
C4 . C3 . B7 . 123.33(19)    yes
C3 . C4 . Fe1 . 72.27(12)    yes
C3 . C4 . C5 . 110.2(2)    yes
Fe1 . C4 . C5 . 69.64(14)    yes
C3 . C4 . H41 . 124.5    no
Fe1 . C4 . H41 . 125.5    no
C5 . C4 . H41 . 125.3    no
C4 . C5 . Fe1 . 69.61(13)    yes
C4 . C5 . C6 . 107.0(2)    yes
Fe1 . C5 . C6 . 69.34(14)    yes
C4 . C5 . H51 . 126.2    no
Fe1 . C5 . H51 . 124.2    no
C6 . C5 . H51 . 126.7    no
C2 . C6 . C5 . 108.9(2)    yes
C2 . C6 . Fe1 . 70.55(13)    yes
C5 . C6 . Fe1 . 69.94(14)    yes
C2 . C6 . H61 . 126.9    no
C5 . C6 . H61 . 124.2    no
Fe1 . C6 . H61 . 124.5    no
C3 . B7 . C8 . 108.82(18)    yes
C3 . B7 . C17 . 115.22(18)    yes
C8 . B7 . C17 . 113.07(18)    yes
C3 . B7 . C26 . 103.45(18)    yes
C8 . B7 . C26 . 114.43(19)    yes
C17 . B7 . C26 . 101.44(18)    yes
B7 . C8 . C9 . 119.26(19)    yes
B7 . C8 . C13 . 125.8(2)    yes
C9 . C8 . C13 . 114.8(2)    yes
C8 . C9 . C10 . 121.9(2)    yes
C8 . C9 . C16 . 123.1(2)    yes
C10 . C9 . C16 . 115.0(2)    yes
C9 . C10 . C11 . 122.4(2)    yes
C9 . C10 . H101 . 118.4    no
C11 . C10 . H101 . 119.2    no
C10 . C11 . C12 . 116.7(2)    yes
C10 . C11 . C15 . 121.2(3)    yes
C12 . C11 . C15 . 122.1(3)    yes
C11 . C12 . C13 . 122.8(2)    yes
C11 . C12 . H121 . 118.7    no
C13 . C12 . H121 . 118.5    no
C8 . C13 . C12 . 121.5(2)    yes
C8 . C13 . C14 . 123.5(2)    yes
C12 . C13 . C14 . 115.0(2)    yes
C13 . C14 . H141 . 110.2    no
C13 . C14 . H142 . 110.1    no
H141 . C14 . H142 . 109.3    no
C13 . C14 . H143 . 111.7    no
H141 . C14 . H143 . 107.5    no
H142 . C14 . H143 . 108.0    no
C11 . C15 . H151 . 110.5    no
C11 . C15 . H152 . 111.1    no
H151 . C15 . H152 . 107.4    no
C11 . C15 . H153 . 111.7    no
H151 . C15 . H153 . 107.4    no
H152 . C15 . H153 . 108.5    no
C9 . C16 . H161 . 111.3    no
C9 . C16 . H162 . 113.1    no
H161 . C16 . H162 . 107.1    no
C9 . C16 . H163 . 111.6    no
H161 . C16 . H163 . 106.9    no
H162 . C16 . H163 . 106.6    no
B7 . C17 . C18 . 127.1(2)    yes
B7 . C17 . C23 . 117.6(2)    yes
C18 . C17 . C23 . 115.2(2)    yes
C17 . C18 . C19 . 121.1(3)    yes
C17 . C18 . C25 . 124.9(2)    yes
C19 . C18 . C25 . 114.0(2)    yes
C18 . C19 . C20 . 123.0(3)    yes
C18 . C19 . H191 . 118.3    no
C20 . C19 . H191 . 118.7    no
C19 . C20 . C21 . 121.1(3)    yes
C19 . C20 . C22 . 116.9(3)    yes
C21 . C20 . C22 . 122.0(3)    yes
C20 . C21 . H211 . 110.2    no
C20 . C21 . H212 . 110.6    no
H211 . C21 . H212 . 108.9    no
C20 . C21 . H213 . 109.4    no
H211 . C21 . H213 . 107.8    no
H212 . C21 . H213 . 109.8    no
C20 . C22 . C23 . 122.5(3)    yes
C20 . C22 . H221 . 119.5    no
C23 . C22 . H221 . 118.0    no
C17 . C23 . C22 . 121.2(3)    yes
C17 . C23 . C24 . 123.0(2)    yes
C22 . C23 . C24 . 115.7(3)    yes
C23 . C24 . H241 . 110.4    no
C23 . C24 . H242 . 110.9    no
H241 . C24 . H242 . 108.0    no
C23 . C24 . H243 . 111.0    no
H241 . C24 . H243 . 108.1    no
H242 . C24 . H243 . 108.5    no
C18 . C25 . H253 . 109.6    no
C18 . C25 . H252 . 112.1    no
H253 . C25 . H252 . 107.9    no
C18 . C25 . H251 . 111.3    no
H253 . C25 . H251 . 108.0    no
H252 . C25 . H251 . 107.7    no
B7 . C26 . N27 . 172.7(3)    yes
C2 . Si28 . O29 . 113.92(12)    yes
C2 . Si28 . C201 . 111.59(8)    yes
O29 . Si28 . C201 . 110.08(14)    yes
C2 . Si28 . C200 . 109.34(8)    yes
O29 . Si28 . C200 . 105.2(2)    yes
C201 . Si28 . C200 . 106.3(2)    yes
Si28 . O29 . H28 . 120.1    no
Si28 . C201 . H2011 . 108.0    no
Si28 . C201 . H2012 . 107.8    no
H2011 . C201 . H2012 . 108.8    no
Si28 . C201 . H2013 . 111.7    no
H2011 . C201 . H2013 . 109.1    no
H2012 . C201 . H2013 . 111.3    no
Fe1 . C32 . C33 . 69.94(18)    yes
Fe1 . C32 . C36 . 69.73(17)    yes
C33 . C32 . C36 . 108.5(3)    yes
Fe1 . C32 . H321 . 123.4    no
C33 . C32 . H321 . 124.9    no
C36 . C32 . H321 . 126.6    no
C32 . C33 . Fe1 . 69.77(16)    yes
C32 . C33 . C34 . 108.1(3)    yes
Fe1 . C33 . C34 . 69.38(16)    yes
C32 . C33 . H331 . 126.2    no
Fe1 . C33 . H331 . 126.4    no
C34 . C33 . H331 . 125.6    no
C33 . C34 . Fe1 . 70.08(16)    yes
C33 . C34 . C35 . 108.1(3)    yes
Fe1 . C34 . C35 . 69.60(16)    yes
C33 . C34 . H341 . 126.3    no
Fe1 . C34 . H341 . 123.6    no
C35 . C34 . H341 . 125.6    no
C34 . C35 . Fe1 . 69.51(16)    yes
C34 . C35 . C36 . 107.7(3)    yes
Fe1 . C35 . C36 . 69.85(16)    yes
C34 . C35 . H351 . 126.5    no
Fe1 . C35 . H351 . 125.2    no
C36 . C35 . H351 . 125.9    no
C35 . C36 . C32 . 107.7(3)    yes
C35 . C36 . Fe1 . 69.37(17)    yes
C32 . C36 . Fe1 . 69.68(18)    yes
C35 . C36 . H361 . 125.5    no
C32 . C36 . H361 . 126.8    no
Fe1 . C36 . H361 . 126.7    no
C303 . N37 . C42 . 106.83(18)    yes
C303 . N37 . C46 . 110.83(18)    yes
C42 . N37 . C46 . 110.70(19)    yes
C303 . N37 . C50 . 110.97(19)    yes
C42 . N37 . C50 . 110.81(18)    yes
C46 . N37 . C50 . 106.75(17)    yes
N37 . C42 . C43 . 115.9(2)    yes
N37 . C42 . H421 . 106.5    no
C43 . C42 . H421 . 109.5    no
N37 . C42 . H422 . 107.8    no
C43 . C42 . H422 . 109.6    no
H421 . C42 . H422 . 107.1    no
C42 . C43 . C44 . 110.6(2)    yes
C42 . C43 . H431 . 109.2    no
C44 . C43 . H431 . 107.5    no
C42 . C43 . H432 . 109.4    no
C44 . C43 . H432 . 109.2    no
H431 . C43 . H432 . 111.0    no
C43 . C44 . C45 . 113.7(3)    yes
C43 . C44 . H441 . 108.7    no
C45 . C44 . H441 . 109.6    no
C43 . C44 . H442 . 107.9    no
C45 . C44 . H442 . 106.9    no
H441 . C44 . H442 . 110.0    no
C44 . C45 . H451 . 110.1    no
C44 . C45 . H452 . 109.5    no
H451 . C45 . H452 . 110.2    no
C44 . C45 . H453 . 110.1    no
H451 . C45 . H453 . 108.2    no
H452 . C45 . H453 . 108.6    no
N37 . C46 . C47 . 114.49(19)    yes
N37 . C46 . H461 . 106.1    no
C47 . C46 . H461 . 109.4    no
N37 . C46 . H462 . 107.3    no
C47 . C46 . H462 . 110.7    no
H461 . C46 . H462 . 108.8    no
C46 . C47 . C48 . 112.9(2)    yes
C46 . C47 . H471 . 109.8    no
C48 . C47 . H471 . 108.2    no
C46 . C47 . H472 . 107.9    no
C48 . C47 . H472 . 108.3    no
H471 . C47 . H472 . 109.7    no
C47 . C48 . C49 . 112.1(2)    yes
C47 . C48 . H481 . 110.1    no
C49 . C48 . H481 . 110.1    no
C47 . C48 . H482 . 107.1    no
C49 . C48 . H482 . 108.7    no
H481 . C48 . H482 . 108.6    no
C48 . C49 . H491 . 111.9    no
C48 . C49 . H492 . 108.7    no
H491 . C49 . H492 . 107.3    no
C48 . C49 . H493 . 109.8    no
H491 . C49 . H493 . 110.0    no
H492 . C49 . H493 . 109.1    no
N37 . C50 . C51 . 114.4(2)    yes
N37 . C50 . H501 . 107.8    no
C51 . C50 . H501 . 108.7    no
N37 . C50 . H502 . 107.9    no
C51 . C50 . H502 . 109.2    no
H501 . C50 . H502 . 108.7    no
C50 . C51 . C52 . 111.9(2)    yes
C50 . C51 . H511 . 110.4    no
C52 . C51 . H511 . 107.7    no
C50 . C51 . H512 . 109.7    no
C52 . C51 . H512 . 108.6    no
H511 . C51 . H512 . 108.5    no
C51 . C52 . C53 . 111.4(3)    yes
C51 . C52 . H521 . 108.4    no
C53 . C52 . H521 . 111.4    no
C51 . C52 . H522 . 108.3    no
C53 . C52 . H522 . 109.4    no
H521 . C52 . H522 . 107.8    no
C52 . C53 . H531 . 109.9    no
C52 . C53 . H532 . 110.3    no
H531 . C53 . H532 . 107.2    no
C52 . C53 . H533 . 110.3    no
H531 . C53 . H533 . 109.6    no
H532 . C53 . H533 . 109.4    no
Si28 . C200 . H2001 . 121.8    no
Si28 . C200 . H2002 . 119.0    no
H2001 . C200 . H2002 . 91.8    no
Si28 . C200 . H2003 . 114.5    no
H2001 . C200 . H2003 . 106.0    no
H2002 . C200 . H2003 . 99.7    no
C221 . C211 . H2111 . 110.0    no
C221 . C211 . H2112 . 107.0    no
H2111 . C211 . H2112 . 110.4    no
C221 . C211 . H2113 . 108.4    no
H2111 . C211 . H2113 . 110.6    no
H2112 . C211 . H2113 . 110.3    no
C220 . C210 . H2101 . 109.0    no
C220 . C210 . H2102 . 110.2    no
H2101 . C210 . H2102 . 109.4    no
C220 . C210 . H2103 . 108.8    no
H2101 . C210 . H2103 . 109.7    no
H2102 . C210 . H2103 . 109.8    no
C210 . C220 . C302 . 109.39(10)    yes
C210 . C220 . H2201 . 108.9    no
C302 . C220 . H2201 . 109.4    no
C210 . C220 . H2202 . 110.9    no
C302 . C220 . H2202 . 110.2    no
H2201 . C220 . H2202 . 108.0    no
C302 . C221 . C211 . 109.23(10)    yes
C302 . C221 . H2211 . 110.2    no
C211 . C221 . H2211 . 110.2    no
C302 . C221 . H2212 . 109.2    no
C211 . C221 . H2212 . 110.3    no
H2211 . C221 . H2212 . 107.6    no
loop_
 _geom_hbond_atom_site_label_D
 _geom_hbond_site_symmetry_D
 _geom_hbond_atom_site_label_H
 _geom_hbond_site_symmetry_H
 _geom_hbond_atom_site_label_A
 _geom_hbond_site_symmetry_A
 _geom_hbond_angle_DHA
 _geom_hbond_distance_DH
 _geom_hbond_distance_HA
 _geom_hbond_distance_DA
 _geom_hbond_publ_flag
C24 . H242 . C8 . 134.50 0.954 2.477 3.219(5)    yes
C46 . H462 . N27 . 154.44 0.966 2.395 3.293(5)    yes
C211 . H2202 . C303 . 132.4 0.894 2.533 3.205(5)    yes
O29 . H28 . N27 . 135.12 0.881 2.333 3.023(5)    yes


_iucr_refine_instructions_details_constraints
;
#
# Punched on 16/02/13 at 21:41:42
#
#LIST     12                                                                    
BLOCK SCALE X'S, U'S 
RIDE C   ( 302,X'S) H   (3021,X'S) H   (3022,X'S) 
RIDE C   ( 303,X'S) H   (3031,X'S) H   (3032,X'S) 
RIDE C   (   4,X'S) H   (  41,X'S) 
RIDE C   (   5,X'S) H   (  51,X'S) 
RIDE C   (   6,X'S) H   (  61,X'S) 
RIDE C   (  10,X'S) H   ( 101,X'S) 
RIDE C   (  12,X'S) H   ( 121,X'S) 
RIDE C   (  14,X'S) H   ( 141,X'S) H   ( 142,X'S) H   ( 143,X'S) 
RIDE C   (  15,X'S) H   ( 151,X'S) H   ( 152,X'S) H   ( 153,X'S) 
RIDE C   (  16,X'S) H   ( 161,X'S) H   ( 162,X'S) H   ( 163,X'S) 
RIDE C   (  19,X'S) H   ( 191,X'S) 
RIDE C   (  21,X'S) H   ( 211,X'S) H   ( 212,X'S) H   ( 213,X'S) 
RIDE C   (  22,X'S) H   ( 221,X'S) 
RIDE C   (  24,X'S) H   ( 241,X'S) H   ( 242,X'S) H   ( 243,X'S) 
RIDE C   (  25,X'S) H   ( 253,X'S) H   ( 252,X'S) H   ( 251,X'S) 
RIDE O   (  29,X'S) H   (  28,X'S) 
RIDE C   ( 201,X'S) H   (2011,X'S) H   (2012,X'S) H   (2013,X'S) 
RIDE C   (  32,X'S) H   ( 321,X'S) 
RIDE C   (  33,X'S) H   ( 331,X'S) 
RIDE C   (  34,X'S) H   ( 341,X'S) 
RIDE C   (  35,X'S) H   ( 351,X'S) 
RIDE C   (  36,X'S) H   ( 361,X'S) 
RIDE C   (  42,X'S) H   ( 421,X'S) H   ( 422,X'S) 
RIDE C   (  43,X'S) H   ( 431,X'S) H   ( 432,X'S) 
RIDE C   (  44,X'S) H   ( 441,X'S) H   ( 442,X'S) 
RIDE C   (  45,X'S) H   ( 451,X'S) H   ( 452,X'S) H   ( 453,X'S) 
RIDE C   (  46,X'S) H   ( 461,X'S) H   ( 462,X'S) 
RIDE C   (  47,X'S) H   ( 471,X'S) H   ( 472,X'S) 
RIDE C   (  48,X'S) H   ( 481,X'S) H   ( 482,X'S) 
RIDE C   (  49,X'S) H   ( 491,X'S) H   ( 492,X'S) H   ( 493,X'S) 
RIDE C   (  50,X'S) H   ( 501,X'S) H   ( 502,X'S) 
RIDE C   (  51,X'S) H   ( 511,X'S) H   ( 512,X'S) 
RIDE C   (  52,X'S) H   ( 521,X'S) H   ( 522,X'S) 
RIDE C   (  53,X'S) H   ( 531,X'S) H   ( 532,X'S) H   ( 533,X'S) 
RIDE C   ( 200,X'S) H   (2001,X'S) H   (2002,X'S) H   (2003,X'S) 
RIDE C   ( 211,X'S) H   (2111,X'S) H   (2112,X'S) H   (2113,X'S) 
RIDE C   ( 210,X'S) H   (2101,X'S) H   (2102,X'S) H   (2103,X'S) 
RIDE C   ( 220,X'S) H   (2201,X'S) H   (2202,X'S) 
RIDE C   ( 221,X'S) H   (2211,X'S) H   (2212,X'S) 
END                                                                             
;


_iucr_refine_instructions_details_restraints
;
#
# Punched on 16/02/13 at 21:41:42
#
#LIST     16                                                                    
REM CH3 
SAME C(2) SI(28) C(200) AND 
CONT C(2) SI(28) C(201) 
SIMU 0.01 C(2) SI(28) C(200) AND 
CONT C(2) SI(28) C(201) 
DELU 0.01 C(2) SI(28) C(200) AND 
CONT C(2) SI(28) C(201) 
REM TBA 
SAME C(302) C(220) C(210) AND 
CONT C(302) C(221) C(211) 
SIMU 0.01   C(302) C(220) C(210) AND 
CONT C(302) C(221) C(211) 
DELU 0.01   C(302) C(220) C(210) AND 
CONT C(302) C(221) C(211) 
REM   HREST   START (DO NOT REMOVE THIS LINE) 
REM   HREST   END (DO NOT REMOVE THIS LINE) 
END                                                                             
;


# start Validation Reply Form

_vrf_PLAT220_nBu4NfcBMes2CNSiMe2OH
;
PROBLEM: Large Non-Solvent    C     Ueq(max)/Ueq(min) ...        4.7 Ratio
RESPONSE: Disordered methyl group unsuitable to modeling. The metrics of
this structure are not discussed. This structure is included for
discussion of the connectivity.
;
_vrf_PLAT230_nBu4NfcBMes2CNSiMe2OH
;
PROBLEM: Large Non-Solvent    C     Ueq(max)/Ueq(min) ...        4.7 Ratio
RESPONSE: Disordered methyl  and hydroxy groups unsuitable to modeling. 
The metrics of this structure are not discussed. This structure is 
included for discussion of the connectivity.
;
_vrf_PLAT390_nBu4NfcBMes2CNSiMe2OH
;
PROBLEM: Large Non-Solvent    C     Ueq(max)/Ueq(min) ...        4.7 Ratio
RESPONSE: Disordered methyl group unsuitable to modeling. 
The metrics of this structure are not discussed. This structure is 
included for discussion of the connectivity.
;
_vrf_PLAT391_nBu4NfcBMes2CNSiMe2OH
;
PROBLEM: Large Non-Solvent    C     Ueq(max)/Ueq(min) ...        4.7 Ratio
RESPONSE: Disordered methyl group unsuitable to modeling. 
The metrics of this structure are not discussed. This structure is 
included for discussion of the connectivity.
;
_vrf_PLAT213_nBu4NfcBMes2CNSiMe2OH
;
PROBLEM: Large Non-Solvent    C     Ueq(max)/Ueq(min) ...        4.7 Ratio
RESPONSE: Disordered methyl group unsuitable to modeling. 
The metrics of this structure are not discussed. This structure is 
included for discussion of the connectivity.
;
_vrf_PLAT222_nBu4NfcBMes2CNSiMe2OH
;
PROBLEM: Large Non-Solvent    C     Ueq(max)/Ueq(min) ...        4.7 Ratio
RESPONSE: Disordered methyl group unsuitable to modeling. 
The metrics of this structure are not discussed. This structure is 
included for discussion of the connectivity.
;
_vrf_PLAT242_nBu4NfcBMes2CNSiMe2OH
;
PROBLEM: Large Non-Solvent    C     Ueq(max)/Ueq(min) ...        4.7 Ratio
RESPONSE: Disordered groups on silicon that were unsuitable to modeling. 
The metrics of this structure are not discussed. This structure is 
included for discussion of the connectivity.
;
# end Validation Reply Form
